# Supplementary material
Source: MDPI journal article supplement (https://www.mdpi.com/2073-4352/6/9/103)
Supplement: s1 [file s1]

Archive with 3 entries (2 files):
- crystals-145466-final check-suppl/
- crystals-145466-final check-suppl/CdCN2_Rcel.cif
- crystals-145466-final check-suppl/crystals-145466-final check -suppl.pdf
