# Supplementary material
Source: MDPI journal article supplement (https://www.mdpi.com/2073-4352/6/9/103)
Supplement: s1 [file s1 › crystals-145466-final check-suppl/CdCN2_Rcel.cif]

data_I 
  
_audit_creation_method            SHELXL-97 
_chemical_name_systematic 
; 
; 
_vrf_PLAT_430_I
;
PROBLEM: Short Inter D...A Contact  N2     ..  N2      ..       1.14 Ang.
PROBLEM: Short Inter D...A Contact  N3     ..  N3      ..       1.13 Ang.
RESPONSE: This alerts arise for atoms of cyanide bridging between two Cd(II) 
ions; N2, N3, C2 and C3. Atoms labeled C2/N2 or C3/N3 are hybrid due to the 
disorder of arrangement of cyanide, and due to the midpoint of C\tb N bonds 
on the symmetry of the lattice. 
Therefore, N2 or N3 do not connect N2_[3_556] or N3_[4_566], 
but connect C2_[3_556] or C3_[4_566], respectively. 
Because it is not suitable that N2-N2[3_556] and N3_ N3_[4_566] 'bonds' 
are listed in geometric parameters table, FREE command are given below: 
FREE N2 N2_$2 & C2 C2_$2 & N3 N3_$3& C3 C3_$3 .
;
_chemical_name_common             ? 
_chemical_melting_point           ? 
_chemical_formula_moiety          ? 
_chemical_formula_sum 
 'C6 H10 Cd N2 O2' 
_chemical_formula_weight          254.56 
  
loop_ 
 _atom_type_symbol 
 _atom_type_description 
 _atom_type_scat_dispersion_real 
 _atom_type_scat_dispersion_imag 
 _atom_type_scat_source 
 'C'  'C'   0.0033   0.0016 
 'International Tables Vol C Tables 4.2.6.8 and 6.1.1.4' 
 'H'  'H'   0.0000   0.0000 
 'International Tables Vol C Tables 4.2.6.8 and 6.1.1.4' 
 'N'  'N'   0.0061   0.0033 
 'International Tables Vol C Tables 4.2.6.8 and 6.1.1.4' 
 'O'  'O'   0.0106   0.0060 
 'International Tables Vol C Tables 4.2.6.8 and 6.1.1.4' 
 'Cd'  'Cd'  -0.8075   1.2024 
 'International Tables Vol C Tables 4.2.6.8 and 6.1.1.4' 
  
_symmetry_cell_setting            Orthorhombic 
_symmetry_space_group_name_H-M    C222(1) 
_symmetry_space_group_name_Hall   'C 2c 2' 
 
loop_ 
 _symmetry_equiv_pos_as_xyz 
 'x, y, z' 
 '-x, -y, z+1/2' 
 '-x, y, -z+1/2' 
 'x, -y, -z' 
 'x+1/2, y+1/2, z' 
 '-x+1/2, -y+1/2, z+1/2' 
 '-x+1/2, y+1/2, -z+1/2' 
 'x+1/2, -y+1/2, -z' 
  
_cell_length_a                    8.1727(3) 
_cell_length_b                    15.7149(6) 
_cell_length_c                    15.3108(6) 
_cell_angle_alpha                 90.00 
_cell_angle_beta                  90.00 
_cell_angle_gamma                 90.00 
_cell_volume                      1966.41(13) 
_cell_formula_units_Z             8 
_cell_measurement_temperature     253 
_cell_measurement_reflns_used     4766 
_cell_measurement_theta_min       2.59 
_cell_measurement_theta_max       30.93 
  
_exptl_crystal_description        block 
_exptl_crystal_colour             colorless 
_exptl_crystal_size_max           0.25 
_exptl_crystal_size_mid           0.23 
_exptl_crystal_size_min           0.21 
_exptl_crystal_density_meas       ? 
_exptl_crystal_density_diffrn     1.720 
_exptl_crystal_density_method     'not measured' 
_exptl_crystal_F_000              992 
_exptl_absorpt_coefficient_mu     2.180 
_exptl_absorpt_correction_type    empirical 
_exptl_absorpt_correction_T_min   0.6117 
_exptl_absorpt_correction_T_max   0.6574 
_exptl_absorpt_process_details    'SADABS; Sheldrick, 1996' 
  
_exptl_special_details 
; 
; 
  
_diffrn_ambient_temperature       253 
_diffrn_radiation_wavelength      0.71073 
_diffrn_radiation_type            MoK\a 
_diffrn_radiation_source          'fine-focus sealed tube' 
_diffrn_radiation_monochromator   graphite 
_diffrn_measurement_device_type   'CCD area detector' 
_diffrn_measurement_method        'phi and omega scans' 
_diffrn_detector_area_resol_mean  8.333 
_diffrn_standards_number          ? 
_diffrn_standards_interval_count  ? 
_diffrn_standards_interval_time   ? 
_diffrn_standards_decay_%         ? 
_diffrn_reflns_number             7375 
_diffrn_reflns_av_R_equivalents   0.0142 
_diffrn_reflns_av_unetI/netI     0.0193 
_diffrn_reflns_limit_h_min        -11 
_diffrn_reflns_limit_h_max        5 
_diffrn_reflns_limit_k_min        -22 
_diffrn_reflns_limit_k_max        22 
_diffrn_reflns_limit_l_min        -21 
_diffrn_reflns_limit_l_max        18 
_diffrn_reflns_theta_min          2.59 
_diffrn_reflns_theta_max          30.93 
_reflns_number_total              2909 
_reflns_number_gt                 2738 
_reflns_threshold_expression      >2sigma(I) 
  
_computing_data_collection        'APEX2 (Bruker 2007)' 
_computing_cell_refinement        'SAINT (Bruker 2007)' 
_computing_data_reduction         'SAINT (Bruker 2007)' 
_computing_structure_solution     'SHELXS-97 (Sheldrick, 2008)' 
_computing_structure_refinement   'SHELXL-97 (Sheldrick, 2008)' 
_computing_molecular_graphics
 'SHELXTL (Sheldrick, 2008) & CrystalMaker (Palmer, 2014)' 
_computing_publication_material
 'SHELXTL (Sheldrick, 2008) & PLATON (Spek, 2009)' 
  
_refine_special_details 
; 
 Refinement of F^2^ against ALL reflections.  The weighted R-factor wR and 
 goodness of fit S are based on F^2^, conventional R-factors R are based 
 on F, with F set to zero for negative F^2^. The threshold expression of 
 F^2^ > 2sigma(F^2^) is used only for calculating R-factors(gt) etc. and is 
 not relevant to the choice of reflections for refinement.  R-factors based 
 on F^2^ are statistically about twice as large as those based on F, and R- 
 factors based on ALL data will be even larger. 
; 
  
_refine_ls_structure_factor_coef  Fsqd 
_refine_ls_matrix_type            full 
_refine_ls_weighting_scheme       calc 
_refine_ls_weighting_details 
 'calc w=1/[\s^2^(Fo^2^)+(0.0185P)^2^+0.2061P] where P=(Fo^2^+2Fc^2^)/3' 
_atom_sites_solution_primary      direct 
_atom_sites_solution_secondary    difmap 
_atom_sites_solution_hydrogens    geom 
_refine_ls_hydrogen_treatment     mixed 
_refine_ls_extinction_method      none 
_refine_ls_extinction_coef        ? 
_refine_ls_abs_structure_details 
 'Flack, H. D. (1983). Acta Cryst. A39, 876-881.' 
_refine_ls_abs_structure_Flack    0.00(3) 
_refine_ls_number_reflns          2909 
_refine_ls_number_parameters      115 
_refine_ls_number_restraints      0 
_refine_ls_R_factor_all           0.0185 
_refine_ls_R_factor_gt            0.0164 
_refine_ls_wR_factor_ref          0.0377 
_refine_ls_wR_factor_gt           0.0369 
_refine_ls_goodness_of_fit_ref    1.030 
_refine_ls_restrained_S_all       1.030 
_refine_ls_shift/su_max           0.003 
_refine_ls_shift/su_mean          0.000 
  
loop_ 
 _atom_site_label 
 _atom_site_type_symbol 
 _atom_site_fract_x 
 _atom_site_fract_y 
 _atom_site_fract_z 
 _atom_site_U_iso_or_equiv 
 _atom_site_adp_type 
 _atom_site_occupancy 
 _atom_site_symmetry_multiplicity 
 _atom_site_calc_flag 
 _atom_site_refinement_flags 
 _atom_site_disorder_assembly 
 _atom_site_disorder_group 
Cd1 Cd 0.127642(18) 0.656438(8) 0.582036(8) 0.03241(4) Uani 1 1 d . A . 
N1 N -0.1059(2) 0.71568(12) 0.51706(13) 0.0477(5) Uani 1 1 d . . . 
N2 N 0.0282(2) 0.66105(13) 0.71590(12) 0.0415(4) Uani 0.50 1 d P . . 
N3 N 0.0941(2) 0.53177(13) 0.51764(13) 0.0442(4) Uani 0.50 1 d P . . 
C1 C 0.3006(3) 0.74410(15) 0.51898(15) 0.0389(4) Uani 1 1 d . . . 
C2 C 0.0282(2) 0.66105(13) 0.71590(12) 0.0415(4) Uani 0.50 1 d P . . 
C3 C 0.0941(2) 0.53177(13) 0.51764(13) 0.0442(4) Uani 0.50 1 d P . . 
O1 O 0.3799(3) 0.58935(13) 0.64714(13) 0.0603(5) Uani 1 1 d . . . 
H1 H 0.366(4) 0.5653(19) 0.686(2) 0.071(10) Uiso 1 1 d . . . 
C11 C 0.5494(4) 0.6102(3) 0.6323(3) 0.0664(16) Uani 0.691(7) 1 d P A 1 
H11A H 0.5568 0.6449 0.5800 0.080 Uiso 0.691(7) 1 calc PR A 1 
H11B H 0.5881 0.6443 0.6808 0.080 Uiso 0.691(7) 1 calc PR A 1 
C11' C 0.4889(11) 0.5512(7) 0.5873(5) 0.059(3) Uani 0.309(7) 1 d P A 2 
H11C H 0.4951 0.5863 0.5354 0.071 Uiso 0.309(7) 1 calc PR A 2 
H11D H 0.4455 0.4962 0.5702 0.071 Uiso 0.309(7) 1 calc PR A 2 
C12 C 0.6549(4) 0.5394(3) 0.62253(18) 0.0803(10) Uani 1 1 d . . . 
H12A H 0.6113 0.5014 0.5783 0.096 Uiso 0.691(7) 1 calc PR A 1 
H12B H 0.7616 0.5587 0.6032 0.096 Uiso 0.691(7) 1 calc PR A 1 
H12C H 0.7190 0.5096 0.5788 0.096 Uiso 0.309(7) 1 calc PR A 2 
H12D H 0.7035 0.5952 0.6300 0.096 Uiso 0.309(7) 1 calc PR A 2 
O2 O 0.6710(2) 0.49502(11) 0.70214(11) 0.0533(4) Uani 1 1 d . A . 
C13 C 0.7471(6) 0.4156(2) 0.6974(3) 0.1050(16) Uani 1 1 d . . . 
H13A H 0.8560 0.4226 0.6732 0.126 Uiso 1 1 calc R A . 
H13B H 0.6855 0.3793 0.6581 0.126 Uiso 1 1 calc R . . 
C14 C 0.7596(5) 0.3741(2) 0.7829(3) 0.1004(14) Uani 1 1 d . A . 
H14A H 0.8119 0.4120 0.8235 0.151 Uiso 1 1 calc R . . 
H14B H 0.8231 0.3230 0.7776 0.151 Uiso 1 1 calc R . . 
H14C H 0.6521 0.3603 0.8037 0.151 Uiso 1 1 calc R . . 
  
loop_ 
 _atom_site_aniso_label 
 _atom_site_aniso_U_11 
 _atom_site_aniso_U_22 
 _atom_site_aniso_U_33 
 _atom_site_aniso_U_23 
 _atom_site_aniso_U_13 
 _atom_site_aniso_U_12 
Cd1 0.03269(6) 0.03330(6) 0.03125(6) 0.00354(5) 0.00302(6) -0.00157(6) 
N1 0.0415(10) 0.0488(10) 0.0529(10) 0.0130(9) -0.0036(9) 0.0058(9) 
N2 0.0408(10) 0.0484(10) 0.0352(8) 0.0027(8) 0.0031(7) -0.0004(9) 
N3 0.0446(11) 0.0431(9) 0.0448(10) -0.0037(8) -0.0012(8) -0.0001(9) 
C1 0.0367(10) 0.0384(11) 0.0415(11) 0.0064(9) 0.0006(9) -0.0003(9) 
C2 0.0408(10) 0.0484(10) 0.0352(8) 0.0027(8) 0.0031(7) -0.0004(9) 
C3 0.0446(11) 0.0431(9) 0.0448(10) -0.0037(8) -0.0012(8) -0.0001(9) 
O1 0.0405(9) 0.0860(13) 0.0544(10) 0.0333(9) -0.0009(10) 0.0067(10) 
C11 0.0354(18) 0.089(3) 0.075(3) 0.046(3) -0.0049(18) -0.0084(19) 
C11' 0.047(4) 0.091(7) 0.039(4) 0.010(5) 0.005(4) 0.015(5) 
C12 0.0545(17) 0.145(3) 0.0415(13) 0.0112(18) 0.0055(12) 0.008(2) 
O2 0.0495(9) 0.0684(11) 0.0421(8) -0.0084(7) 0.0010(7) 0.0160(8) 
C13 0.122(4) 0.094(3) 0.100(3) -0.026(2) 0.013(3) 0.049(3) 
C14 0.095(3) 0.068(2) 0.137(4) 0.014(3) -0.011(3) 0.020(2) 
  
_geom_special_details 
; 
 All esds (except the esd in the dihedral angle between two l.s. planes) 
 are estimated using the full covariance matrix.  The cell esds are taken 
 into account individually in the estimation of esds in distances, angles 
 and torsion angles; correlations between esds in cell parameters are only 
 used when they are defined by crystal symmetry.  An approximate (isotropic) 
 treatment of cell esds is used for estimating esds involving l.s. planes. 
; 
  
loop_ 
 _geom_bond_atom_site_label_1 
 _geom_bond_atom_site_label_2 
 _geom_bond_distance 
 _geom_bond_site_symmetry_2 
 _geom_bond_publ_flag 
Cd1 C1 2.197(2) . y 
Cd1 N1 2.3449(19) . y 
Cd1 N2 2.2060(18) . y 
Cd1 N3 2.210(2) . y 
Cd1 O1 2.5207(19) . y 
N1 C1 1.135(3) 8_466 y 
N2 C2 1.141(4) 3_556 y 
N3 C3 1.135(4) 4_566 y 
C1 N1 1.135(3) 8_566 ? 
O1 C11' 1.411(9) . ? 
O1 C11 1.442(4) . ? 
O1 H1 0.72(3) . ? 
C11 C12 1.415(6) . ? 
C11 H11A 0.9700 . ? 
C11 H11B 0.9700 . ? 
C11' C12 1.471(10) . ? 
C11' H11C 0.9700 . ? 
C11' H11D 0.9700 . ? 
C12 O2 1.410(3) . ? 
C12 H12A 0.9700 . ? 
C12 H12B 0.9700 . ? 
C12 H12C 0.9700 . ? 
C12 H12D 0.9700 . ? 
O2 C13 1.396(3) . ? 
C13 C14 1.467(5) . ? 
C13 H13A 0.9700 . ? 
C13 H13B 0.9700 . ? 
C14 H14A 0.9600 . ? 
C14 H14B 0.9600 . ? 
C14 H14C 0.9600 . ? 
  
loop_ 
 _geom_angle_atom_site_label_1 
 _geom_angle_atom_site_label_2 
 _geom_angle_atom_site_label_3 
 _geom_angle 
 _geom_angle_site_symmetry_1 
 _geom_angle_site_symmetry_3 
 _geom_angle_publ_flag 
C1 Cd1 N2 128.65(8) . . y 
C1 Cd1 N3 116.08(8) . . y 
N2 Cd1 N3 113.44(8) . . y 
C1 Cd1 N1 95.06(7) . . y 
N1 Cd1 N2 94.67(7) . . y 
N1 Cd1 N3 93.53(7) . . y 
C1 Cd1 O1 84.83(7) . . y 
N1 Cd1 O1 177.94(7) . . y 
N2 Cd1 O1 86.99(7) . . y 
N3 Cd1 O1 84.67(7) . . y 
C1 N1 Cd1 167.28(19) 8_466 . ? 
C2 N2 Cd1 177.10(19) 3_556 . ? 
C3 N3 Cd1 172.67(8) 4_566 . ? 
N1 C1 Cd1 174.9(2) 8_566 . ? 
C11' O1 C11 52.2(5) . . ? 
C11' O1 Cd1 115.9(4) . . ? 
C11 O1 Cd1 128.93(18) . . ? 
C11' O1 H1 115(3) . . ? 
C11 O1 H1 114(3) . . ? 
Cd1 O1 H1 115(3) . . ? 
C12 C11 O1 115.0(4) . . ? 
C12 C11 H11A 108.5 . . ? 
O1 C11 H11A 108.5 . . ? 
C12 C11 H11B 108.5 . . ? 
O1 C11 H11B 108.5 . . ? 
H11A C11 H11B 107.5 . . ? 
O1 C11' C12 113.5(6) . . ? 
O1 C11' H11C 108.9 . . ? 
C12 C11' H11C 108.9 . . ? 
O1 C11' H11D 108.9 . . ? 
C12 C11' H11D 108.9 . . ? 
H11C C11' H11D 107.7 . . ? 
O2 C12 C11 110.8(3) . . ? 
O2 C12 C11' 117.7(4) . . ? 
C11 C12 C11' 51.6(4) . . ? 
O2 C12 H12A 109.5 . . ? 
C11 C12 H12A 109.5 . . ? 
C11' C12 H12A 58.9 . . ? 
O2 C12 H12B 109.5 . . ? 
C11 C12 H12B 109.5 . . ? 
C11' C12 H12B 132.7 . . ? 
H12A C12 H12B 108.1 . . ? 
O2 C12 H12C 107.9 . . ? 
C11 C12 H12C 141.3 . . ? 
C11' C12 H12C 107.9 . . ? 
H12A C12 H12C 54.6 . . ? 
H12B C12 H12C 56.9 . . ? 
O2 C12 H12D 107.9 . . ? 
C11 C12 H12D 61.7 . . ? 
C11' C12 H12D 107.9 . . ? 
H12A C12 H12D 142.1 . . ? 
H12B C12 H12D 52.0 . . ? 
H12C C12 H12D 107.2 . . ? 
C13 O2 C12 116.0(3) . . ? 
O2 C13 C14 112.4(3) . . ? 
O2 C13 H13A 109.1 . . ? 
C14 C13 H13A 109.1 . . ? 
O2 C13 H13B 109.1 . . ? 
C14 C13 H13B 109.1 . . ? 
H13A C13 H13B 107.9 . . ? 
C13 C14 H14A 109.5 . . ? 
C13 C14 H14B 109.5 . . ? 
H14A C14 H14B 109.5 . . ? 
C13 C14 H14C 109.5 . . ? 
H14A C14 H14C 109.5 . . ? 
H14B C14 H14C 109.5 . . ? 
  
loop_
    _geom_torsion_atom_site_label_1
    _geom_torsion_atom_site_label_2
    _geom_torsion_atom_site_label_3
    _geom_torsion_atom_site_label_4
    _geom_torsion_site_symmetry_1
    _geom_torsion_site_symmetry_2
    _geom_torsion_site_symmetry_3
    _geom_torsion_site_symmetry_4
    _geom_torsion
    _geom_torsion_publ_flag
O1 C11 C12 O2 . . . . -68.6(4) y
O1 C11' C12 O2 . . . . 54.1(9) y

loop_ 
 _geom_hbond_atom_site_label_D 
 _geom_hbond_atom_site_label_H 
 _geom_hbond_atom_site_label_A 
 _geom_hbond_distance_DH 
 _geom_hbond_distance_HA 
 _geom_hbond_distance_DA 
 _geom_hbond_angle_DHA 
 _geom_hbond_site_symmetry_A 
O1 H1 O2  0.72(3) 2.06(3) 2.774(2) 179(4) 3_656 
  
_diffrn_measured_fraction_theta_max    0.948 
_diffrn_reflns_theta_full              25.00 
_diffrn_measured_fraction_theta_full   1.000 
_refine_diff_density_max    0.327 
_refine_diff_density_min   -0.333 
_refine_diff_density_rms    0.053 

_iucr_refine_instructions_details
;
TITL test_0 in C222(1)
CELL 0.71073   8.1727  15.7149  15.3108  90.000  90.000  90.000
ZERR    8.00   0.0003   0.0006   0.0006   0.000   0.000   0.000
LATT -7
SYMM -X, -Y, 0.5+Z
SYMM -X, Y, 0.5-Z
SYMM X, -Y, -Z
SFAC C  H  N  O  Cd
UNIT 48 80 16 16 8
L.S. 4
BOND
acta 50
FMAP 2
PLAN 20
bond $h
htab
eqiv $2 -x, y, -z+3/2
eqiv $3 x, -y+1, -z+1
eqiv $5 -x+1, y, -z+3/2
free N2 N2_$2 C2 C2_$2 N3 N3_$3 C3 C3_$3
exyz N2 C2
exyz N3 C3
eadp N2 C2
eadp N3 C3
htab O1 O2_$5
size 0.25 0.23 0.21
TEMP -20
WGHT    0.018500    0.206100
FVAR       0.21519   0.69084
MOLE 1
CD1   5    0.127642    0.656438    0.582036    11.00000    0.03269    0.03330 =
         0.03125    0.00354    0.00302   -0.00157
N1    3   -0.105874    0.715678    0.517056    11.00000    0.04147    0.04877 =
         0.05295    0.01297   -0.00360    0.00585
N2    3    0.028214    0.661046    0.715905    10.50000    0.04083    0.04835 =
         0.03522    0.00272    0.00313   -0.00043
N3    3    0.094069    0.531770    0.517644    10.50000    0.04456    0.04314 =
         0.04477   -0.00372   -0.00124   -0.00010
C1    1    0.300580    0.744104    0.518985    11.00000    0.03670    0.03839 =
         0.04155    0.00639    0.00057   -0.00031
C2    1    0.028214    0.661046    0.715905    10.50000    0.04083    0.04835 =
         0.03522    0.00272    0.00313   -0.00043
C3    1    0.094069    0.531770    0.517644    10.50000    0.04456    0.04314 =
         0.04477   -0.00372   -0.00124   -0.00010
O1    4    0.379855    0.589349    0.647140    11.00000    0.04046    0.08595 =
         0.05437    0.03332   -0.00093    0.00672
H1    2    0.366028    0.565277    0.686238    11.00000    0.07102
part 1
C11   1    0.549445    0.610198    0.632262    21.00000    0.03538    0.08897 =
         0.07473    0.04575   -0.00489   -0.00838
AFIX  23
H11A  2    0.556804    0.644903    0.580018    21.00000   -1.20000
H11B  2    0.588099    0.644346    0.680837    21.00000   -1.20000
AFIX   0
part 2
C11'  1    0.488868    0.551179    0.587342   -21.00000    0.04746    0.09067 =
         0.03888    0.01000    0.00541    0.01515
AFIX  23
H11C  2    0.495121    0.586318    0.535363   -21.00000   -1.20000
H11D  2    0.445522    0.496199    0.570201   -21.00000   -1.20000
AFIX   0
part 0
C12   1    0.654855    0.539382    0.622527    11.00000    0.05448    0.14486 =
         0.04153    0.01116    0.00546    0.00809
part 1
AFIX  23
H12A  2    0.611287    0.501426    0.578310    21.00000   -1.20000
H12B  2    0.761627    0.558700    0.603230    21.00000   -1.20000
AFIX  23
part 2
H12C  2    0.719049    0.509642    0.578848   -21.00000   -1.20000
H12D  2    0.703490    0.595216    0.629988   -21.00000   -1.20000
AFIX   0
part 0
O2    4    0.671034    0.495016    0.702141    11.00000    0.04950    0.06835 =
         0.04210   -0.00838    0.00104    0.01596
C13   1    0.747148    0.415608    0.697363    11.00000    0.12179    0.09360 =
         0.09976   -0.02551    0.01254    0.04935
AFIX  23
H13A  2    0.856021    0.422597    0.673177    11.00000   -1.20000
H13B  2    0.685522    0.379256    0.658127    11.00000   -1.20000
AFIX   0
C14   1    0.759630    0.374128    0.782924    11.00000    0.09549    0.06839 =
         0.13731    0.01411   -0.01079    0.02000
AFIX 137
H14A  2    0.811905    0.411965    0.823477    11.00000   -1.50000
H14B  2    0.823091    0.322988    0.777569    11.00000   -1.50000
H14C  2    0.652064    0.360283    0.803725    11.00000   -1.50000
HKLF 4
 
REM  test_0 in C222(1)
REM R1 =  0.0164 for   2738 Fo > 4sig(Fo)  and  0.0185 for all   2909 data
REM    115 parameters refined using      0 restraints
 
END  
     
WGHT      0.0185      0.2061 
REM Highest difference peak  0.327,  deepest hole -0.333,  1-sigma level  0.053
Q1    1   0.0528  0.6256  0.5831  11.00000  0.05    0.33
Q2    1   0.0583  0.6916  0.5939  11.00000  0.05    0.29
Q3    1   0.1989  0.6213  0.5917  11.00000  0.05    0.28
Q4    1   0.2054  0.6901  0.5938  11.00000  0.05    0.26
Q5    1   0.8167  0.4423  0.7200  11.00000  0.05    0.21
Q6    1   0.3628  0.6257  0.6797  11.00000  0.05    0.20
Q7    1   0.1241  0.6552  0.5272  11.00000  0.05    0.19
Q8    1   0.7371  0.4194  0.6526  11.00000  0.05    0.18
Q9    1   0.0635  0.5519  0.5555  11.00000  0.05    0.18
Q10   1   0.6077  0.6271  0.4581  11.00000  0.05    0.17
Q11   1   0.6225  0.6236  0.7031  11.00000  0.05    0.17
Q12   1  -0.1186  0.7076  0.4851  11.00000  0.05    0.16
Q13   1  -0.0329  0.5315  0.5795  11.00000  0.05    0.15
Q14   1   0.5808  0.5223  0.7170  11.00000  0.05    0.15
Q15   1   0.5000  0.6387  0.7500  10.50000  0.05    0.15
Q16   1   0.3667  0.7425  0.5388  11.00000  0.05    0.15
Q17   1   0.9264  0.5321  0.7087  11.00000  0.05    0.15
Q18   1   0.8648  0.4892  0.7361  11.00000  0.05    0.15
Q19   1   0.0664  0.6823  0.6977  11.00000  0.05    0.15
Q20   1  -0.0180  0.7254  0.5067  11.00000  0.05    0.15
;

#END I
 
data_II 
  
_audit_creation_method            SHELXL-2014 
_chemical_name_systematic 
; 
 ? 
; 

_vrf_PLAT_241_II
;
PROBLEM: High   'MainMol' Ueq as Compared to Neighbors of        C20 Check 
PROBLEM: High   'MainMol' Ueq as Compared to Neighbors of        C26 Check 
RESPONSE: These alerts arise because of the insoluble disorder associated 
with the butyl groups, especially, C17, C20 and C26. Alert PLAT242 arises 
because the C17 of high Ueq is adjacent to O4 of low Ueq 
(in the other word, very weak or non disorder). 
;

_vrf_PLAT_242_II
;
PROBLEM: Low    'MainMol' Ueq as Compared to Neighbors of         O4 Check
RESPONSE: Please see our response to _vrf_PLAT241_II.
;

_chemical_name_common             ? 
_chemical_melting_point           ? 
_chemical_formula_moiety          ? 
_chemical_formula_sum 
 'C26 H42 Cd4 N8 O6' 
_chemical_formula_weight          1012.27 
  
loop_ 
 _atom_type_symbol 
 _atom_type_description 
 _atom_type_scat_dispersion_real 
 _atom_type_scat_dispersion_imag 
 _atom_type_scat_source 
 'C'  'C'   0.0033   0.0016 
 'International Tables Vol C Tables 4.2.6.8 and 6.1.1.4' 
 'H'  'H'   0.0000   0.0000 
 'International Tables Vol C Tables 4.2.6.8 and 6.1.1.4' 
 'N'  'N'   0.0061   0.0033 
 'International Tables Vol C Tables 4.2.6.8 and 6.1.1.4' 
 'O'  'O'   0.0106   0.0060 
 'International Tables Vol C Tables 4.2.6.8 and 6.1.1.4' 
 'Cd'  'Cd'  -0.8075   1.2024 
 'International Tables Vol C Tables 4.2.6.8 and 6.1.1.4' 
  
_space_group_crystal_system       monoclinic 
_space_group_IT_number            14 
_space_group_name_H-M_alt         'P 21/c' 
_space_group_name_Hall            '-P 2ybc' 
  
_shelx_space_group_comment 
; 
The symmetry employed for this shelxl refinement is uniquely defined 
by the following loop, which should always be used as a source of 
symmetry information in preference to the above space-group names. 
They are only intended as comments. 
; 
  
loop_ 
 _space_group_symop_operation_xyz 
 'x, y, z' 
 '-x, y+1/2, -z+1/2' 
 '-x, -y, -z' 
 'x, -y-1/2, z-1/2' 
  
_cell_length_a                    8.9441(4) 
_cell_length_b                    15.2192(7) 
_cell_length_c                    29.4582(13) 
_cell_angle_alpha                 90 
_cell_angle_beta                  91.6930(10) 
_cell_angle_gamma                 90 
_cell_volume                      4008.2(3) 
_cell_formula_units_Z             4 
_cell_measurement_temperature     273 
_cell_measurement_reflns_used     9962 
_cell_measurement_theta_min       2.278 
_cell_measurement_theta_max       28.261 
  
_exptl_crystal_description        block 
_exptl_crystal_colour             colorless 
_exptl_crystal_density_meas       1.636 
_exptl_crystal_density_method     'floating method' 
_exptl_crystal_density_diffrn     1.677 
_exptl_crystal_F_000              1976 
_exptl_transmission_factor_min    ? 
_exptl_transmission_factor_max    ? 
_exptl_crystal_size_max           0.420 
_exptl_crystal_size_mid           0.320 
_exptl_crystal_size_min           0.260 
_exptl_absorpt_coefficient_mu     2.135 
_shelx_estimated_absorpt_T_min    0.467 
_shelx_estimated_absorpt_T_max    0.607 
_exptl_absorpt_correction_type    empirical 
_exptl_absorpt_correction_T_min   0.4675 
_exptl_absorpt_correction_T_max   0.6067 
_exptl_absorpt_process_details    'SADABS; Sheldrick, 1996' 
  
_exptl_special_details 
; 
 ? 
; 
  
_diffrn_ambient_temperature       273 
_diffrn_radiation_wavelength      0.71073 
_diffrn_radiation_type            MoK\a 
_diffrn_source                    'fine-focus sealed tube' 
_diffrn_measurement_device_type   'CCD area detector' 
_diffrn_measurement_method        'phi and omega scans' 
_diffrn_detector_area_resol_mean  8.333 
_diffrn_reflns_number             29345 
_diffrn_reflns_av_unetI/netI      0.0280 
_diffrn_reflns_av_R_equivalents   0.0228 
_diffrn_reflns_limit_h_min        -11 
_diffrn_reflns_limit_h_max        11 
_diffrn_reflns_limit_k_min        -11 
_diffrn_reflns_limit_k_max        20 
_diffrn_reflns_limit_l_min        -38 
_diffrn_reflns_limit_l_max        39 
_diffrn_reflns_theta_min          1.925 
_diffrn_reflns_theta_max          28.317 
_diffrn_reflns_theta_full         25.242 
_diffrn_measured_fraction_theta_max   0.996 
_diffrn_measured_fraction_theta_full  1.000 
_diffrn_reflns_Laue_measured_fraction_max    0.996 
_diffrn_reflns_Laue_measured_fraction_full   1.000 
_diffrn_reflns_point_group_measured_fraction_max   0.996 
_diffrn_reflns_point_group_measured_fraction_full  1.000 
_reflns_number_total              9947 
_reflns_number_gt                 7933 
_reflns_threshold_expression      'I > 2\s(I)' 
_reflns_Friedel_coverage          0.000 
_reflns_Friedel_fraction_max      . 
_reflns_Friedel_fraction_full     . 
  
_reflns_special_details 
; 
 Reflections were merged by SHELXL according to the crystal 
 class for the calculation of statistics and refinement. 
  
 _reflns_Friedel_fraction is defined as the number of unique 
 Friedel pairs measured divided by the number that would be 
 possible theoretically, ignoring centric projections and 
 systematic absences. 
; 
  
_computing_data_collection     'SMART (Bruker, 2007)'
_computing_cell_refinement     'SAINT (Bruker, 2007)'
_computing_data_reduction     'SAINT (Bruker, 2007)'
_computing_structure_solution     'SHELXS97 (Sheldrick, 2008)'
_computing_structure_refinement
'SHELXL97 (Sheldrick, 2008) & SHELXL-2014 (Sheldrick, 2014)' 
_computing_molecular_graphics
 'SHELXTL (Sheldrick, 2008) & CrystalMaker (Palmer, 2014)'
_computing_publication_material
 'SHELXTL-2014 (Sheldrick, 2014) & PLATON (Spek, 2009)' 
  
_refine_special_details 
; 
 ? 
; 
_refine_ls_structure_factor_coef  Fsqd 
_refine_ls_matrix_type            full 
_refine_ls_weighting_scheme       calc 
_refine_ls_weighting_details 
'w=1/[\s^2^(Fo^2^)+(0.0372P)^2^+1.7273P] where P=(Fo^2^+2Fc^2^)/3' 
_atom_sites_solution_primary      ? 
_atom_sites_solution_secondary    ? 
_atom_sites_solution_hydrogens    mixed 
_refine_ls_hydrogen_treatment     mixed 
_refine_ls_extinction_method      none 
_refine_ls_extinction_coef        . 
_refine_ls_number_reflns          9947 
_refine_ls_number_parameters      438 
_refine_ls_number_restraints      63 
_refine_ls_R_factor_all           0.0445 
_refine_ls_R_factor_gt            0.0326 
_refine_ls_wR_factor_ref          0.0802 
_refine_ls_wR_factor_gt           0.0749 
_refine_ls_goodness_of_fit_ref    1.010 
_refine_ls_restrained_S_all       1.019 
_refine_ls_shift/su_max           0.003 
_refine_ls_shift/su_mean          0.000 
  
loop_ 
 _atom_site_label 
 _atom_site_type_symbol 
 _atom_site_fract_x 
 _atom_site_fract_y 
 _atom_site_fract_z 
 _atom_site_U_iso_or_equiv 
 _atom_site_adp_type 
 _atom_site_occupancy 
 _atom_site_site_symmetry_order 
 _atom_site_calc_flag 
 _atom_site_refinement_flags_posn 
 _atom_site_refinement_flags_adp 
 _atom_site_refinement_flags_occupancy 
 _atom_site_disorder_assembly 
 _atom_site_disorder_group 
Cd1 Cd 0.07544(2) 0.85736(2) 0.12327(2) 0.04491(7) Uani 1 1 d . . . . . 
Cd2 Cd 0.59222(2) 0.70009(2) 0.19955(2) 0.04331(7) Uani 1 1 d . . . . . 
Cd3 Cd 0.48954(2) 0.36586(2) 0.13282(2) 0.04306(7) Uani 1 1 d . . . . . 
Cd4 Cd 0.98462(3) 0.19813(2) 0.06324(2) 0.04547(7) Uani 1 1 d . . . . . 
N1 N 0.3864(3) 0.7571(2) 0.15964(10) 0.0606(8) Uani 1 1 d . . . . . 
N2 N -0.1356(4) 0.7935(2) 0.14324(11) 0.0680(8) Uani 1 1 d . . . . . 
N3 N 0.5427(3) 0.5627(2) 0.17983(9) 0.0568(7) Uani 1 1 d . . . . . 
N4 N 0.4767(3) 0.2936(2) 0.20132(10) 0.0607(8) Uani 1 1 d . . . . . 
N5 N 0.6937(4) 0.2975(2) 0.10993(10) 0.0612(8) Uani 1 1 d . . . . . 
N6 N 1.1795(4) 0.2761(2) 0.08964(11) 0.0660(8) Uani 1 1 d . . . . . 
N7 N 0.0627(3) 0.8113(2) 0.04810(10) 0.0639(8) Uani 1 1 d . . . . . 
N8 N 1.0214(4) 0.0641(3) 0.09064(10) 0.0689(9) Uani 1 1 d . . . . . 
C1 C 0.2836(4) 0.7918(2) 0.14610(11) 0.0502(8) Uani 1 1 d . . . . . 
C2 C 0.7642(4) 0.7605(2) 0.15882(11) 0.0500(8) Uani 1 1 d . . . . . 
C3 C 0.5207(3) 0.4943(2) 0.16523(9) 0.0424(7) Uani 1 1 d . . . . . 
C4 C 0.5437(4) 0.7611(2) 0.26495(11) 0.0502(8) Uani 1 1 d . . . . . 
C5 C 0.7934(3) 0.2618(2) 0.09535(10) 0.0458(7) Uani 1 1 d . . . . . 
C6 C 0.2817(3) 0.3119(2) 0.10415(11) 0.0476(7) Uani 1 1 d . . . . . 
C7 C 0.9534(4) 0.1963(2) -0.01029(11) 0.0533(8) Uani 1 1 d . . . . . 
C8 C 0.0434(4) 0.9943(2) 0.10303(11) 0.0476(7) Uani 1 1 d . . . . . 
C9 C 0.1740(7) 0.9023(4) 0.24132(17) 0.0743(16) Uani 0.758(7) 1 d . . P A 1 
H9A H 0.2193 0.8454 0.2363 0.089 Uiso 0.758(7) 1 calc R U P A 1 
H9B H 0.2541 0.9452 0.2429 0.089 Uiso 0.758(7) 1 calc R U P A 1 
C9' C 0.062(2) 0.8683(13) 0.2359(6) 0.0743(16) Uani 0.242(7) 1 d . . P A 2 
H9'1 H 0.1197 0.8160 0.2297 0.089 Uiso 0.242(7) 1 calc R U P A 2 
H9'2 H -0.0425 0.8508 0.2362 0.089 Uiso 0.242(7) 1 calc R U P A 2 
C10 C 0.1067(7) 0.9003(3) 0.28294(17) 0.1029(17) Uani 1 1 d . . . . . 
H10A H 0.1757 0.8755 0.3055 0.123 Uiso 0.688(7) 1 calc R U P A 1 
H10B H 0.0192 0.8627 0.2809 0.123 Uiso 0.688(7) 1 calc R U P A 1 
H10C H 0.0678 0.8586 0.3045 0.123 Uiso 0.312(7) 1 calc R U P A 2 
H10D H 0.2149 0.8974 0.2857 0.123 Uiso 0.312(7) 1 calc R U P A 2 
C11 C -0.0188(10) 0.9748(5) 0.3373(2) 0.097(2) Uani 0.688(7) 1 d D . P A 1 
H11A H 0.0396 0.9425 0.3600 0.116 Uiso 0.688(7) 1 calc R U P A 1 
H11B H -0.1108 0.9428 0.3309 0.116 Uiso 0.688(7) 1 calc R U P A 1 
C12 C -0.0532(12) 1.0649(5) 0.3544(3) 0.106(3) Uani 0.688(7) 1 d D . P A 1 
H12A H -0.1135 1.0954 0.3315 0.127 Uiso 0.688(7) 1 calc R U P A 1 
H12B H 0.0398 1.0971 0.3585 0.127 Uiso 0.688(7) 1 calc R U P A 1 
C11' C -0.0697(18) 1.0147(13) 0.3222(5) 0.097(2) Uani 0.312(7) 1 d D . P A 2 
H11C H -0.1046 1.0708 0.3104 0.116 Uiso 0.312(7) 1 calc R U P A 2 
H11D H -0.1505 0.9724 0.3192 0.116 Uiso 0.312(7) 1 calc R U P A 2 
C12' C -0.019(3) 1.0235(14) 0.3710(5) 0.106(3) Uani 0.312(7) 1 d D . P A 2 
H12C H 0.0028 0.9657 0.3833 0.127 Uiso 0.312(7) 1 calc R U P A 2 
H12D H 0.0720 1.0579 0.3728 0.127 Uiso 0.312(7) 1 calc R U P A 2 
C13 C -0.1347(9) 1.0664(6) 0.3986(2) 0.148(3) Uani 1 1 d . . . . . 
H13A H -0.1693 1.1264 0.4022 0.177 Uiso 0.688(7) 1 calc R U P A 1 
H13B H -0.2236 1.0309 0.3935 0.177 Uiso 0.688(7) 1 calc R U P A 1 
H13C H -0.1363 1.1297 0.3947 0.177 Uiso 0.312(7) 1 calc R U P A 2 
H13D H -0.2338 1.0426 0.3925 0.177 Uiso 0.312(7) 1 calc R U P A 2 
C14 C -0.0766(9) 1.0416(6) 0.4409(3) 0.167(3) Uani 1 1 d . . . . . 
H14A H -0.1516 1.0489 0.4633 0.250 Uiso 0.688(7) 1 calc R U P A 1 
H14B H -0.0464 0.9811 0.4400 0.250 Uiso 0.688(7) 1 calc R U P A 1 
H14C H 0.0084 1.0776 0.4487 0.250 Uiso 0.688(7) 1 calc R U P A 1 
H14D H -0.1389 1.0643 0.4642 0.250 Uiso 0.312(7) 1 calc R U P A 2 
H14E H -0.0735 0.9787 0.4428 0.250 Uiso 0.312(7) 1 calc R U P A 2 
H14F H 0.0228 1.0647 0.4450 0.250 Uiso 0.312(7) 1 calc R U P A 2 
C15 C 0.8729(6) 0.6531(4) 0.28794(18) 0.0741(16) Uani 0.779(7) 1 d . . P B 1 
H15A H 0.8322 0.7093 0.2970 0.089 Uiso 0.779(7) 1 calc R U P B 1 
H15B H 0.8372 0.6091 0.3089 0.089 Uiso 0.779(7) 1 calc R U P B 1 
C15' C 0.918(2) 0.6917(14) 0.2567(7) 0.0741(16) Uani 0.221(7) 1 d . . P B 2 
H15C H 0.8668 0.7423 0.2690 0.089 Uiso 0.221(7) 1 calc R U P B 2 
H15D H 0.9724 0.7115 0.2306 0.089 Uiso 0.221(7) 1 calc R U P B 2 
C16 C 1.0285(6) 0.6570(3) 0.29227(19) 0.1023(18) Uani 1 1 d . . . . . 
H16A H 1.0669 0.6939 0.2684 0.123 Uiso 0.646(9) 1 calc R U P B 1 
H16B H 1.0569 0.6834 0.3212 0.123 Uiso 0.646(9) 1 calc R U P B 1 
H16C H 1.1109 0.6985 0.2939 0.123 Uiso 0.354(9) 1 calc R U P B 2 
H16D H 0.9796 0.6601 0.3212 0.123 Uiso 0.354(9) 1 calc R U P B 2 
C17 C 1.2518(19) 0.5671(14) 0.2791(5) 0.156(5) Uani 0.646(9) 1 d D U P B 1 
H17A H 1.2626 0.5354 0.2509 0.187 Uiso 0.646(9) 1 calc R U P B 1 
H17B H 1.2929 0.6255 0.2754 0.187 Uiso 0.646(9) 1 calc R U P B 1 
C18 C 1.3282(18) 0.5247(14) 0.3131(5) 0.186(5) Uani 0.646(9) 1 d D U P B 1 
H18A H 1.2825 0.4671 0.3150 0.224 Uiso 0.646(9) 1 calc R U P B 1 
H18B H 1.3039 0.5553 0.3408 0.224 Uiso 0.646(9) 1 calc R U P B 1 
C19 C 1.4794(12) 0.5103(9) 0.3160(5) 0.159(4) Uani 0.646(9) 1 d . U P B 1 
H19A H 1.5303 0.5462 0.2940 0.191 Uiso 0.646(9) 1 calc R U P B 1 
H19B H 1.5018 0.4491 0.3102 0.191 Uiso 0.646(9) 1 calc R U P B 1 
C17' C 1.243(4) 0.582(2) 0.3005(11) 0.156(5) Uani 0.354(9) 1 d D U P B 2 
H17C H 1.2561 0.5929 0.3328 0.187 Uiso 0.354(9) 1 calc R U P B 2 
H17D H 1.2837 0.6316 0.2844 0.187 Uiso 0.354(9) 1 calc R U P B 2 
C18' C 1.322(4) 0.504(2) 0.2888(10) 0.186(5) Uani 0.354(9) 1 d D U P B 2 
H18C H 1.4035 0.5134 0.2683 0.224 Uiso 0.354(9) 1 calc R U P B 2 
H18D H 1.2587 0.4556 0.2786 0.224 Uiso 0.354(9) 1 calc R U P B 2 
C19' C 1.374(2) 0.4982(17) 0.3409(8) 0.159(4) Uani 0.354(9) 1 d . U P B 2 
H19C H 1.2958 0.5268 0.3577 0.191 Uiso 0.354(9) 1 calc R U P B 2 
H19D H 1.3704 0.4365 0.3490 0.191 Uiso 0.354(9) 1 calc R U P B 2 
C20 C 1.5258(10) 0.5341(8) 0.3612(4) 0.216(5) Uani 1 1 d . U . . . 
H20A H 1.6316 0.5253 0.3651 0.323 Uiso 0.646(9) 1 calc R U P B 1 
H20B H 1.5025 0.5948 0.3664 0.323 Uiso 0.646(9) 1 calc R U P B 1 
H20C H 1.4742 0.4982 0.3825 0.323 Uiso 0.646(9) 1 calc R U P B 1 
H20D H 1.5312 0.5231 0.3933 0.323 Uiso 0.354(9) 1 calc R U P B 2 
H20E H 1.6072 0.5050 0.3470 0.323 Uiso 0.354(9) 1 calc R U P B 2 
H20F H 1.5320 0.5962 0.3558 0.323 Uiso 0.354(9) 1 calc R U P B 2 
C21 C 0.6377(4) 0.5054(3) 0.05630(14) 0.0696(11) Uani 1 1 d . . . . . 
H21A H 0.6800 0.4929 0.0270 0.084 Uiso 1 1 calc R U . . . 
H21B H 0.7122 0.4906 0.0797 0.084 Uiso 1 1 calc R U . . . 
C22 C 0.6019(5) 0.6019(3) 0.05911(13) 0.0754(12) Uani 1 1 d . . . . . 
H22A H 0.5403 0.6127 0.0851 0.091 Uiso 1 1 calc R U . . . 
H22B H 0.6938 0.6351 0.0633 0.091 Uiso 1 1 calc R U . . . 
C23 C 0.4509(7) 0.7115(4) 0.02323(18) 0.1102(19) Uani 1 1 d D . . . . 
H23A H 0.3680 0.6995 0.0428 0.132 Uiso 0.508(6) 1 calc R U P C 1 
H23B H 0.4064 0.7222 -0.0067 0.132 Uiso 0.508(6) 1 calc R U P C 1 
H23C H 0.4033 0.7174 0.0522 0.132 Uiso 0.492(6) 1 calc R U P C 2 
H23D H 0.3775 0.7205 -0.0012 0.132 Uiso 0.492(6) 1 calc R U P C 2 
C24 C 0.5063(13) 0.7945(6) 0.0378(4) 0.098(2) Uani 0.508(6) 1 d D . P C 1 
H24A H 0.5532 0.7891 0.0678 0.117 Uiso 0.508(6) 1 calc R U P C 1 
H24B H 0.4243 0.8359 0.0396 0.117 Uiso 0.508(6) 1 calc R U P C 1 
C25 C 0.6139(16) 0.8266(9) 0.0062(6) 0.142(4) Uani 0.508(6) 1 d D U P C 1 
H25A H 0.5683 0.8259 -0.0241 0.170 Uiso 0.508(6) 1 calc R U P C 1 
H25B H 0.6982 0.7864 0.0063 0.170 Uiso 0.508(6) 1 calc R U P C 1 
C24' C 0.5938(13) 0.7769(6) 0.0192(5) 0.098(2) Uani 0.492(6) 1 d D . P C 2 
H24C H 0.6627 0.7685 0.0449 0.117 Uiso 0.492(6) 1 calc R U P C 2 
H24D H 0.6464 0.7645 -0.0084 0.117 Uiso 0.492(6) 1 calc R U P C 2 
C25' C 0.5380(14) 0.8679(8) 0.0184(6) 0.142(4) Uani 0.492(6) 1 d D . P C 2 
H25C H 0.4833 0.8807 0.0456 0.170 Uiso 0.492(6) 1 calc R U P C 2 
H25D H 0.4729 0.8780 -0.0080 0.170 Uiso 0.492(6) 1 calc R U P C 2 
C26 C 0.6748(9) 0.9225(6) 0.0164(4) 0.195(4) Uani 1 1 d D . . . . 
H26A H 0.7454 0.9386 -0.0060 0.292 Uiso 0.508(6) 1 calc R U P C 1 
H26B H 0.5929 0.9633 0.0156 0.292 Uiso 0.508(6) 1 calc R U P C 1 
H26C H 0.7230 0.9237 0.0460 0.292 Uiso 0.508(6) 1 calc R U P C 1 
H26D H 0.6475 0.9835 0.0159 0.292 Uiso 0.492(6) 1 calc R U P C 2 
H26E H 0.7379 0.9110 0.0427 0.292 Uiso 0.492(6) 1 calc R U P C 2 
H26F H 0.7276 0.9083 -0.0105 0.292 Uiso 0.492(6) 1 calc R U P C 2 
O1 O 0.0777(4) 0.92293(19) 0.20221(9) 0.0730(8) Uani 1 1 d D . . . . 
H1HY H 0.033(5) 0.969(2) 0.2058(17) 0.110 Uiso 1 1 d D U . . . 
O2 O 0.0641(4) 0.9838(2) 0.29677(9) 0.0807(8) Uani 1 1 d D . . . . 
O3 O 0.8147(3) 0.63231(19) 0.24268(10) 0.0739(8) Uani 1 1 d D . . . . 
H3HY H 0.850(5) 0.588(2) 0.2329(17) 0.111 Uiso 1 1 d D U . . . 
O4 O 1.0914(3) 0.5737(2) 0.28956(11) 0.0837(9) Uani 1 1 d . . . . . 
O5 O 0.5089(3) 0.45225(18) 0.06184(8) 0.0572(6) Uani 1 1 d . . . . . 
H5HY H 0.479(5) 0.429(3) 0.0386(14) 0.086 Uiso 1 1 d . U . . . 
O6 O 0.5257(3) 0.63005(18) 0.01927(8) 0.0697(7) Uani 1 1 d . . . . . 
  
loop_ 
 _atom_site_aniso_label 
 _atom_site_aniso_U_11 
 _atom_site_aniso_U_22 
 _atom_site_aniso_U_33 
 _atom_site_aniso_U_23 
 _atom_site_aniso_U_13 
 _atom_site_aniso_U_12 
Cd1 0.04505(13) 0.04703(13) 0.04252(12) 0.00208(10) -0.00103(9) 0.00498(10) 
Cd2 0.04536(13) 0.04451(13) 0.04008(11) -0.00684(10) 0.00170(9) 0.00144(10) 
Cd3 0.04728(13) 0.04249(13) 0.03945(11) -0.00124(9) 0.00177(9) -0.00266(10) 
Cd4 0.04984(13) 0.04690(14) 0.03940(12) -0.00182(10) -0.00316(9) 0.00259(10) 
N1 0.0541(17) 0.067(2) 0.0601(17) -0.0060(16) -0.0090(14) 0.0154(15) 
N2 0.070(2) 0.069(2) 0.0649(19) -0.0003(17) -0.0020(16) 0.0023(17) 
N3 0.0600(17) 0.0607(19) 0.0493(15) -0.0001(15) -0.0045(13) 0.0006(14) 
N4 0.074(2) 0.0612(19) 0.0472(15) 0.0117(14) 0.0028(14) -0.0111(15) 
N5 0.0662(19) 0.065(2) 0.0524(16) 0.0050(15) -0.0038(14) 0.0004(16) 
N6 0.069(2) 0.065(2) 0.0639(19) -0.0024(16) 0.0028(16) 0.0008(17) 
N7 0.0701(19) 0.079(2) 0.0424(15) -0.0060(15) -0.0033(13) 0.0130(17) 
N8 0.070(2) 0.080(2) 0.0568(18) -0.0028(18) 0.0021(15) -0.0023(18) 
C1 0.0517(18) 0.0522(19) 0.0465(17) -0.0066(15) -0.0040(14) 0.0058(16) 
C2 0.0466(18) 0.056(2) 0.0484(17) 0.0061(16) 0.0082(14) -0.0053(15) 
C3 0.0559(18) 0.0362(16) 0.0351(14) -0.0049(13) -0.0011(12) -0.0029(13) 
C4 0.059(2) 0.0465(18) 0.0447(17) -0.0066(15) 0.0017(14) 0.0070(15) 
C5 0.0444(17) 0.0500(18) 0.0430(16) -0.0035(14) 0.0024(13) 0.0090(14) 
C6 0.0429(16) 0.0511(19) 0.0485(17) -0.0029(15) -0.0056(13) -0.0085(14) 
C7 0.0525(19) 0.061(2) 0.0458(17) -0.0039(16) -0.0001(14) 0.0096(16) 
C8 0.0584(19) 0.0384(17) 0.0458(16) 0.0095(14) -0.0007(14) 0.0026(14) 
C9 0.084(4) 0.076(4) 0.061(3) -0.009(3) -0.013(3) 0.022(3) 
C9' 0.084(4) 0.076(4) 0.061(3) -0.009(3) -0.013(3) 0.022(3) 
C10 0.158(5) 0.076(3) 0.073(3) 0.013(3) -0.024(3) -0.007(3) 
C11 0.134(6) 0.078(5) 0.080(5) 0.028(4) 0.025(4) 0.001(4) 
C12 0.152(7) 0.079(6) 0.089(6) 0.013(4) 0.047(5) 0.009(5) 
C11' 0.134(6) 0.078(5) 0.080(5) 0.028(4) 0.025(4) 0.001(4) 
C12' 0.152(7) 0.079(6) 0.089(6) 0.013(4) 0.047(5) 0.009(5) 
C13 0.159(7) 0.176(8) 0.110(5) 0.003(5) 0.029(5) 0.019(6) 
C14 0.148(7) 0.198(9) 0.155(7) 0.032(7) 0.011(5) 0.007(6) 
C15 0.089(4) 0.070(4) 0.062(3) -0.008(3) -0.017(3) 0.020(3) 
C15' 0.089(4) 0.070(4) 0.062(3) -0.008(3) -0.017(3) 0.020(3) 
C16 0.120(4) 0.075(3) 0.108(4) 0.007(3) -0.055(3) -0.018(3) 
C17 0.064(4) 0.229(10) 0.175(12) 0.080(9) 0.005(9) -0.004(5) 
C18 0.099(5) 0.259(11) 0.201(11) 0.084(8) -0.008(7) 0.044(6) 
C19 0.089(5) 0.196(9) 0.192(9) 0.076(7) 0.008(5) 0.024(6) 
C17' 0.064(4) 0.229(10) 0.175(12) 0.080(9) 0.005(9) -0.004(5) 
C18' 0.099(5) 0.259(11) 0.201(11) 0.084(8) -0.008(7) 0.044(6) 
C19' 0.089(5) 0.196(9) 0.192(9) 0.076(7) 0.008(5) 0.024(6) 
C20 0.146(7) 0.259(11) 0.241(10) 0.046(9) -0.022(6) 0.031(7) 
C21 0.061(2) 0.081(3) 0.066(2) 0.019(2) -0.0047(18) -0.005(2) 
C22 0.096(3) 0.074(3) 0.055(2) 0.009(2) -0.017(2) -0.026(2) 
C23 0.166(6) 0.083(4) 0.080(3) -0.006(3) -0.014(3) 0.020(4) 
C24 0.123(8) 0.064(4) 0.108(7) -0.003(4) 0.029(5) 0.019(5) 
C25 0.108(8) 0.105(9) 0.215(13) 0.006(9) 0.056(8) -0.001(7) 
C24' 0.123(8) 0.064(4) 0.108(7) -0.003(4) 0.029(5) 0.019(5) 
C25' 0.108(8) 0.105(9) 0.215(13) 0.006(9) 0.056(8) -0.001(7) 
C26 0.130(6) 0.150(8) 0.305(12) 0.052(8) 0.014(7) 0.006(6) 
O1 0.104(2) 0.0648(18) 0.0493(14) -0.0101(14) -0.0096(14) 0.0221(15) 
O2 0.111(2) 0.075(2) 0.0572(15) -0.0103(15) 0.0118(15) -0.0222(17) 
O3 0.0819(19) 0.0649(18) 0.0730(17) -0.0141(14) -0.0271(15) 0.0245(15) 
O4 0.0590(16) 0.082(2) 0.108(2) 0.0249(19) -0.0193(15) -0.0089(15) 
O5 0.0639(15) 0.0650(16) 0.0423(12) 0.0033(12) -0.0018(11) -0.0086(12) 
O6 0.098(2) 0.0671(17) 0.0436(13) -0.0017(13) -0.0098(13) 0.0036(15) 
  
_geom_special_details 
; 
 All esds (except the esd in the dihedral angle between two l.s. planes) 
 are estimated using the full covariance matrix.  The cell esds are taken 
 into account individually in the estimation of esds in distances, angles 
 and torsion angles; correlations between esds in cell parameters are only 
 used when they are defined by crystal symmetry.  An approximate (isotropic) 
 treatment of cell esds is used for estimating esds involving l.s. planes. 
; 
  
loop_ 
 _geom_bond_atom_site_label_1 
 _geom_bond_atom_site_label_2 
 _geom_bond_distance 
 _geom_bond_site_symmetry_2 
 _geom_bond_publ_flag 
Cd1 C8 2.185(3) . ? 
Cd1 C1 2.200(3) . ? 
Cd1 N2 2.218(3) . ? 
Cd1 N7 2.322(3) . ? 
Cd1 O1 2.530(3) . ? 
Cd2 C2 2.182(3) . ? 
Cd2 C4 2.194(3) . ? 
Cd2 N3 2.212(3) . ? 
Cd2 N1 2.323(3) . ? 
Cd2 O3 2.547(3) . ? 
Cd3 C6 2.180(3) . ? 
Cd3 C3 2.190(3) . ? 
Cd3 N5 2.223(3) . ? 
Cd3 N4 2.303(3) . ? 
Cd3 O5 2.480(2) . ? 
Cd4 C7 2.176(3) . ? 
Cd4 C5 2.203(3) . ? 
Cd4 N8 2.215(4) . ? 
Cd4 N6 2.229(3) . ? 
N1 C1 1.123(4) . ? 
N2 C2 1.136(4) 1_455 ? 
N3 C3 1.140(4) . ? 
N4 C4 1.130(4) 2_645 ? 
N5 C5 1.140(4) . ? 
N6 C6 1.137(4) 1_655 ? 
N7 C7 1.125(4) 3_665 ? 
N8 C8 1.137(5) 1_645 ? 
C2 N2 1.136(4) 1_655 ? 
C4 N4 1.130(4) 2_655 ? 
C6 N6 1.137(4) 1_455 ? 
C7 N7 1.125(4) 3_665 ? 
C8 N8 1.137(5) 1_465 ? 
C9 C10 1.382(7) . ? 
C9 O1 1.452(6) . ? 
C9 H9A 0.9700 . ? 
C9 H9B 0.9700 . ? 
C9' O1 1.306(19) . ? 
C9' C10 1.513(17) . ? 
C9' H9'1 0.9700 . ? 
C9' H9'2 0.9700 . ? 
C10 O2 1.391(6) . ? 
C10 H10A 0.9700 . ? 
C10 H10B 0.9700 . ? 
C10 H10C 0.9700 . ? 
C10 H10D 0.9700 . ? 
C11 O2 1.430(7) . ? 
C11 C12 1.497(9) . ? 
C11 H11A 0.9700 . ? 
C11 H11B 0.9700 . ? 
C12 C13 1.511(10) . ? 
C12 H12A 0.9700 . ? 
C12 H12B 0.9700 . ? 
C11' C12' 1.499(16) . ? 
C11' O2 1.505(14) . ? 
C11' H11C 0.9700 . ? 
C11' H11D 0.9700 . ? 
C12' C13 1.49(2) . ? 
C12' H12C 0.9700 . ? 
C12' H12D 0.9700 . ? 
C13 C14 1.388(9) . ? 
C13 H13A 0.9700 . ? 
C13 H13B 0.9700 . ? 
C13 H13C 0.9700 . ? 
C13 H13D 0.9700 . ? 
C14 H14A 0.9600 . ? 
C14 H14B 0.9600 . ? 
C14 H14C 0.9600 . ? 
C14 H14D 0.9600 . ? 
C14 H14E 0.9600 . ? 
C14 H14F 0.9600 . ? 
C15 C16 1.396(7) . ? 
C15 O3 1.452(5) . ? 
C15 H15A 0.9700 . ? 
C15 H15B 0.9700 . ? 
C15' O3 1.35(2) . ? 
C15' C16 1.516(18) . ? 
C15' H15C 0.9700 . ? 
C15' H15D 0.9700 . ? 
C16 O4 1.390(6) . ? 
C16 H16A 0.9700 . ? 
C16 H16B 0.9700 . ? 
C16 H16C 0.9700 . ? 
C16 H16D 0.9700 . ? 
C17 C18 1.358(14) . ? 
C17 O4 1.479(17) . ? 
C17 H17A 0.9700 . ? 
C17 H17B 0.9700 . ? 
C18 C19 1.370(18) . ? 
C18 H18A 0.9700 . ? 
C18 H18B 0.9700 . ? 
C19 C20 1.431(14) . ? 
C19 H19A 0.9700 . ? 
C19 H19B 0.9700 . ? 
C17' O4 1.39(4) . ? 
C17' C18' 1.433(19) . ? 
C17' H17C 0.9700 . ? 
C17' H17D 0.9700 . ? 
C18' C19' 1.59(4) . ? 
C18' H18C 0.9700 . ? 
C18' H18D 0.9700 . ? 
C19' C20 1.57(2) . ? 
C19' H19C 0.9700 . ? 
C19' H19D 0.9700 . ? 
C20 H20A 0.9600 . ? 
C20 H20B 0.9600 . ? 
C20 H20C 0.9600 . ? 
C20 H20D 0.9600 . ? 
C20 H20E 0.9600 . ? 
C20 H20F 0.9600 . ? 
C21 O5 1.421(4) . ? 
C21 C22 1.507(6) . ? 
C21 H21A 0.9700 . ? 
C21 H21B 0.9700 . ? 
C22 O6 1.406(4) . ? 
C22 H22A 0.9700 . ? 
C22 H22B 0.9700 . ? 
C23 O6 1.415(6) . ? 
C23 C24 1.419(10) . ? 
C23 C24' 1.628(12) . ? 
C23 H23A 0.9700 . ? 
C23 H23B 0.9700 . ? 
C23 H23C 0.9700 . ? 
C23 H23D 0.9700 . ? 
C24 C25 1.443(13) . ? 
C24 H24A 0.9700 . ? 
C24 H24B 0.9700 . ? 
C25 C26 1.584(14) . ? 
C25 H25A 0.9700 . ? 
C25 H25B 0.9700 . ? 
C24' C25' 1.472(13) . ? 
C24' H24C 0.9700 . ? 
C24' H24D 0.9700 . ? 
C25' C26 1.482(12) . ? 
C25' H25C 0.9700 . ? 
C25' H25D 0.9700 . ? 
C26 H26A 0.9600 . ? 
C26 H26B 0.9600 . ? 
C26 H26C 0.9600 . ? 
C26 H26D 0.9600 . ? 
C26 H26E 0.9600 . ? 
C26 H26F 0.9600 . ? 
O1 H1HY 0.812(19) . ? 
O3 H3HY 0.806(19) . ? 
O5 H5HY 0.81(4) . ? 
  
loop_ 
 _geom_angle_atom_site_label_1 
 _geom_angle_atom_site_label_2 
 _geom_angle_atom_site_label_3 
 _geom_angle 
 _geom_angle_site_symmetry_1 
 _geom_angle_site_symmetry_3 
 _geom_angle_publ_flag 
C8 Cd1 C1 128.24(13) . . ? 
C8 Cd1 N2 112.61(12) . . ? 
C1 Cd1 N2 116.09(13) . . ? 
C8 Cd1 N7 91.44(12) . . ? 
C1 Cd1 N7 99.90(11) . . ? 
N2 Cd1 N7 95.90(12) . . ? 
C8 Cd1 O1 82.64(11) . . ? 
C1 Cd1 O1 85.07(10) . . ? 
N2 Cd1 O1 85.01(11) . . ? 
N7 Cd1 O1 173.88(10) . . ? 
C2 Cd2 C4 117.75(13) . . ? 
C2 Cd2 N3 113.13(12) . . ? 
C4 Cd2 N3 126.01(12) . . ? 
C2 Cd2 N1 97.20(12) . . ? 
C4 Cd2 N1 96.41(11) . . ? 
N3 Cd2 N1 94.06(11) . . ? 
C2 Cd2 O3 83.78(12) . . ? 
C4 Cd2 O3 84.57(11) . . ? 
N3 Cd2 O3 84.01(10) . . ? 
N1 Cd2 O3 178.06(11) . . ? 
C6 Cd3 C3 126.97(12) . . ? 
C6 Cd3 N5 113.87(12) . . ? 
C3 Cd3 N5 117.07(12) . . ? 
C6 Cd3 N4 95.48(11) . . ? 
C3 Cd3 N4 93.05(11) . . ? 
N5 Cd3 N4 96.03(11) . . ? 
C6 Cd3 O5 87.31(10) . . ? 
C3 Cd3 O5 83.28(10) . . ? 
N5 Cd3 O5 85.06(10) . . ? 
N4 Cd3 O5 176.27(10) . . ? 
C7 Cd4 C5 110.76(12) . . ? 
C7 Cd4 N8 111.38(13) . . ? 
C5 Cd4 N8 110.93(12) . . ? 
C7 Cd4 N6 115.46(13) . . ? 
C5 Cd4 N6 103.02(12) . . ? 
N8 Cd4 N6 104.89(12) . . ? 
C1 N1 Cd2 169.6(3) . . ? 
C2 N2 Cd1 171.4(3) 1_455 . ? 
C3 N3 Cd2 172.9(3) . . ? 
C4 N4 Cd3 173.2(3) 2_645 . ? 
C5 N5 Cd3 175.3(3) . . ? 
C6 N6 Cd4 176.4(3) 1_655 . ? 
C7 N7 Cd1 167.6(3) 3_665 . ? 
C8 N8 Cd4 177.0(3) 1_645 . ? 
N1 C1 Cd1 176.5(3) . . ? 
N2 C2 Cd2 170.4(3) 1_655 . ? 
N3 C3 Cd3 175.5(3) . . ? 
N4 C4 Cd2 177.8(3) 2_655 . ? 
N5 C5 Cd4 176.3(3) . . ? 
N6 C6 Cd3 173.5(3) 1_455 . ? 
N7 C7 Cd4 174.7(4) 3_665 . ? 
N8 C8 Cd1 176.2(3) 1_465 . ? 
C10 C9 O1 116.4(5) . . ? 
C10 C9 H9A 108.2 . . ? 
O1 C9 H9A 108.2 . . ? 
C10 C9 H9B 108.2 . . ? 
O1 C9 H9B 108.2 . . ? 
H9A C9 H9B 107.3 . . ? 
O1 C9' C10 117.3(15) . . ? 
O1 C9' H9'1 108.0 . . ? 
C10 C9' H9'1 108.0 . . ? 
O1 C9' H9'2 108.0 . . ? 
C10 C9' H9'2 108.0 . . ? 
H9'1 C9' H9'2 107.2 . . ? 
C9 C10 O2 111.8(5) . . ? 
O2 C10 C9' 119.7(8) . . ? 
C9 C10 H10A 109.3 . . ? 
O2 C10 H10A 109.3 . . ? 
C9 C10 H10B 109.3 . . ? 
O2 C10 H10B 109.3 . . ? 
H10A C10 H10B 107.9 . . ? 
O2 C10 H10C 107.4 . . ? 
C9' C10 H10C 107.4 . . ? 
O2 C10 H10D 107.4 . . ? 
C9' C10 H10D 107.4 . . ? 
H10C C10 H10D 106.9 . . ? 
O2 C11 C12 108.1(6) . . ? 
O2 C11 H11A 110.1 . . ? 
C12 C11 H11A 110.1 . . ? 
O2 C11 H11B 110.1 . . ? 
C12 C11 H11B 110.1 . . ? 
H11A C11 H11B 108.4 . . ? 
C11 C12 C13 114.5(7) . . ? 
C11 C12 H12A 108.6 . . ? 
C13 C12 H12A 108.6 . . ? 
C11 C12 H12B 108.6 . . ? 
C13 C12 H12B 108.6 . . ? 
H12A C12 H12B 107.6 . . ? 
C12' C11' O2 106.5(13) . . ? 
C12' C11' H11C 110.4 . . ? 
O2 C11' H11C 110.4 . . ? 
C12' C11' H11D 110.4 . . ? 
O2 C11' H11D 110.4 . . ? 
H11C C11' H11D 108.6 . . ? 
C13 C12' C11' 111.8(16) . . ? 
C13 C12' H12C 109.3 . . ? 
C11' C12' H12C 109.3 . . ? 
C13 C12' H12D 109.3 . . ? 
C11' C12' H12D 109.3 . . ? 
H12C C12' H12D 107.9 . . ? 
C14 C13 C12' 97.2(9) . . ? 
C14 C13 C12 126.3(8) . . ? 
C14 C13 H13A 105.7 . . ? 
C12 C13 H13A 105.7 . . ? 
C14 C13 H13B 105.7 . . ? 
C12 C13 H13B 105.7 . . ? 
H13A C13 H13B 106.2 . . ? 
C14 C13 H13C 112.3 . . ? 
C12' C13 H13C 112.3 . . ? 
C14 C13 H13D 112.3 . . ? 
C12' C13 H13D 112.3 . . ? 
H13C C13 H13D 109.9 . . ? 
C13 C14 H14A 109.5 . . ? 
C13 C14 H14B 109.5 . . ? 
H14A C14 H14B 109.5 . . ? 
C13 C14 H14C 109.5 . . ? 
H14A C14 H14C 109.5 . . ? 
H14B C14 H14C 109.5 . . ? 
C13 C14 H14D 109.5 . . ? 
C13 C14 H14E 109.5 . . ? 
H14D C14 H14E 109.5 . . ? 
C13 C14 H14F 109.5 . . ? 
H14D C14 H14F 109.5 . . ? 
H14E C14 H14F 109.5 . . ? 
C16 C15 O3 115.0(5) . . ? 
C16 C15 H15A 108.5 . . ? 
O3 C15 H15A 108.5 . . ? 
C16 C15 H15B 108.5 . . ? 
O3 C15 H15B 108.5 . . ? 
H15A C15 H15B 107.5 . . ? 
O3 C15' C16 113.9(15) . . ? 
O3 C15' H15C 108.8 . . ? 
C16 C15' H15C 108.8 . . ? 
O3 C15' H15D 108.8 . . ? 
C16 C15' H15D 108.8 . . ? 
H15C C15' H15D 107.7 . . ? 
O4 C16 C15 111.0(4) . . ? 
O4 C16 C15' 122.3(8) . . ? 
O4 C16 H16A 109.4 . . ? 
C15 C16 H16A 109.4 . . ? 
O4 C16 H16B 109.4 . . ? 
C15 C16 H16B 109.4 . . ? 
H16A C16 H16B 108.0 . . ? 
O4 C16 H16C 106.7 . . ? 
C15' C16 H16C 106.7 . . ? 
O4 C16 H16D 106.7 . . ? 
C15' C16 H16D 106.7 . . ? 
H16C C16 H16D 106.6 . . ? 
C18 C17 O4 110.5(14) . . ? 
C18 C17 H17A 109.5 . . ? 
O4 C17 H17A 109.5 . . ? 
C18 C17 H17B 109.5 . . ? 
O4 C17 H17B 109.5 . . ? 
H17A C17 H17B 108.1 . . ? 
C17 C18 C19 126.6(18) . . ? 
C17 C18 H18A 105.7 . . ? 
C19 C18 H18A 105.7 . . ? 
C17 C18 H18B 105.7 . . ? 
C19 C18 H18B 105.7 . . ? 
H18A C18 H18B 106.1 . . ? 
C18 C19 C20 106.0(13) . . ? 
C18 C19 H19A 110.5 . . ? 
C20 C19 H19A 110.5 . . ? 
C18 C19 H19B 110.5 . . ? 
C20 C19 H19B 110.5 . . ? 
H19A C19 H19B 108.7 . . ? 
O4 C17' C18' 111(3) . . ? 
O4 C17' H17C 109.5 . . ? 
C18' C17' H17C 109.5 . . ? 
O4 C17' H17D 109.5 . . ? 
C18' C17' H17D 109.5 . . ? 
H17C C17' H17D 108.0 . . ? 
C17' C18' C19' 87(2) . . ? 
C17' C18' H18C 114.2 . . ? 
C19' C18' H18C 114.2 . . ? 
C17' C18' H18D 114.2 . . ? 
C19' C18' H18D 114.2 . . ? 
H18C C18' H18D 111.4 . . ? 
C20 C19' C18' 125(2) . . ? 
C20 C19' H19C 106.1 . . ? 
C18' C19' H19C 106.1 . . ? 
C20 C19' H19D 106.1 . . ? 
C18' C19' H19D 106.1 . . ? 
H19C C19' H19D 106.3 . . ? 
C19 C20 H20A 109.5 . . ? 
C19 C20 H20B 109.5 . . ? 
H20A C20 H20B 109.5 . . ? 
C19 C20 H20C 109.5 . . ? 
H20A C20 H20C 109.5 . . ? 
H20B C20 H20C 109.5 . . ? 
C19' C20 H20D 109.5 . . ? 
C19' C20 H20E 109.5 . . ? 
H20D C20 H20E 109.5 . . ? 
C19' C20 H20F 109.5 . . ? 
H20D C20 H20F 109.5 . . ? 
H20E C20 H20F 109.5 . . ? 
O5 C21 C22 111.9(3) . . ? 
O5 C21 H21A 109.2 . . ? 
C22 C21 H21A 109.2 . . ? 
O5 C21 H21B 109.2 . . ? 
C22 C21 H21B 109.2 . . ? 
H21A C21 H21B 107.9 . . ? 
O6 C22 C21 110.5(3) . . ? 
O6 C22 H22A 109.6 . . ? 
C21 C22 H22A 109.6 . . ? 
O6 C22 H22B 109.6 . . ? 
C21 C22 H22B 109.6 . . ? 
H22A C22 H22B 108.1 . . ? 
O6 C23 C24 130.0(7) . . ? 
O6 C23 C24' 98.9(5) . . ? 
O6 C23 H23A 104.8 . . ? 
C24 C23 H23A 104.8 . . ? 
O6 C23 H23B 104.8 . . ? 
C24 C23 H23B 104.8 . . ? 
H23A C23 H23B 105.8 . . ? 
O6 C23 H23C 112.0 . . ? 
C24' C23 H23C 112.0 . . ? 
O6 C23 H23D 112.0 . . ? 
C24' C23 H23D 112.0 . . ? 
H23C C23 H23D 109.7 . . ? 
C23 C24 C25 109.9(9) . . ? 
C23 C24 H24A 109.7 . . ? 
C25 C24 H24A 109.7 . . ? 
C23 C24 H24B 109.7 . . ? 
C25 C24 H24B 109.7 . . ? 
H24A C24 H24B 108.2 . . ? 
C24 C25 C26 114.9(11) . . ? 
C24 C25 H25A 108.5 . . ? 
C26 C25 H25A 108.5 . . ? 
C24 C25 H25B 108.5 . . ? 
C26 C25 H25B 108.5 . . ? 
H25A C25 H25B 107.5 . . ? 
C25' C24' C23 108.0(8) . . ? 
C25' C24' H24C 110.1 . . ? 
C23 C24' H24C 110.1 . . ? 
C25' C24' H24D 110.1 . . ? 
C23 C24' H24D 110.1 . . ? 
H24C C24' H24D 108.4 . . ? 
C24' C25' C26 104.3(9) . . ? 
C24' C25' H25C 110.9 . . ? 
C26 C25' H25C 110.9 . . ? 
C24' C25' H25D 110.9 . . ? 
C26 C25' H25D 110.9 . . ? 
H25C C25' H25D 108.9 . . ? 
C25 C26 H26A 109.5 . . ? 
C25 C26 H26B 109.5 . . ? 
H26A C26 H26B 109.5 . . ? 
C25 C26 H26C 109.5 . . ? 
H26A C26 H26C 109.5 . . ? 
H26B C26 H26C 109.5 . . ? 
C25' C26 H26D 109.5 . . ? 
C25' C26 H26E 109.5 . . ? 
H26D C26 H26E 109.5 . . ? 
C25' C26 H26F 109.5 . . ? 
H26D C26 H26F 109.5 . . ? 
H26E C26 H26F 109.5 . . ? 
C9' O1 Cd1 116.7(8) . . ? 
C9 O1 Cd1 129.2(3) . . ? 
C9' O1 H1HY 112(4) . . ? 
C9 O1 H1HY 112(4) . . ? 
Cd1 O1 H1HY 118(4) . . ? 
C10 O2 C11 108.1(4) . . ? 
C10 O2 C11' 131.3(9) . . ? 
C15' O3 Cd2 113.5(8) . . ? 
C15 O3 Cd2 128.6(3) . . ? 
C15' O3 H3HY 114(4) . . ? 
C15 O3 H3HY 112(4) . . ? 
Cd2 O3 H3HY 118(4) . . ? 
C16 O4 C17' 107.4(14) . . ? 
C16 O4 C17 118.1(9) . . ? 
C21 O5 Cd3 118.4(2) . . ? 
C21 O5 H5HY 113(3) . . ? 
Cd3 O5 H5HY 117(3) . . ? 
C22 O6 C23 114.6(3) . . ? 
  
loop_ 
 _geom_torsion_atom_site_label_1 
 _geom_torsion_atom_site_label_2 
 _geom_torsion_atom_site_label_3 
 _geom_torsion_atom_site_label_4 
 _geom_torsion 
 _geom_torsion_site_symmetry_1 
 _geom_torsion_site_symmetry_2 
 _geom_torsion_site_symmetry_3 
 _geom_torsion_site_symmetry_4 
 _geom_torsion_publ_flag 
O1 C9_a C10 O2 -69.5(7) . . . . ? 
O1 C9' C10 O2 44.6(19) . . . . ? 
O3 C15 C16 O4 -71.5(6) . . . . ? 
O3 C15' C16 O4 42(2) . . . . ? 
O5 C21 C22 O6 -74.2(4) . . . . ? 
  
loop_ 
 _geom_hbond_atom_site_label_D 
 _geom_hbond_atom_site_label_H 
 _geom_hbond_atom_site_label_A 
 _geom_hbond_distance_DH 
 _geom_hbond_distance_HA 
 _geom_hbond_distance_DA 
 _geom_hbond_angle_DHA 
 _geom_hbond_site_symmetry_A 
O5 H5HY O6  0.81(4) 1.93(4) 2.708(3) 162(5) 3_665 
O3 H3HY O2  0.806(19) 1.97(2) 2.777(4) 174(5) 2_645 
O1 H1HY O4  0.812(19) 1.95(2) 2.763(4) 174(5) 2_655 
  
_refine_diff_density_max    0.501 
_refine_diff_density_min   -0.688 
_refine_diff_density_rms    0.093 
  
_shelxl_version_number 2014-3 
  
_shelx_res_file 
; 
TITL ino_3 in P2(1)/c 
CELL 0.71073   8.9441  15.2192  29.4582  90.000  91.693  90.000 
ZERR    4.00   0.0004   0.0007   0.0013   0.000   0.001   0.000 
LATT 1 
SYMM -X, 0.5+Y, 0.5-Z 
SFAC C  H  N  O  Cd 
UNIT 104 168 32 24 16 
L.S. 4 
ACTA 
bond $h 
FMAP 2 
PLAN 20 
eadp C9 C9' 
eadp C11 C11' 
eadp C12 C12' 
eadp C15 C15' 
eadp C17 C17' 
eadp C18 C18' 
eadp C19 C19' 
eadp C24 C24' 
eadp C25 C25' 
omit 0 0 2 
isor C17 C18 C19 C25 
rigu C17 > C20 
rigu C26 
dfix 0.82 0.02 O1 H1HY O3 H3HY 
sadi O2 C11 O2 C11' 
sadi C11 C12 C11' C12' 
dfix 1.45 0.02 C17 C18 C17' C18' 
sadi C23 C24 C23 C24' 
sadi C24 C25 C24' C25' 
sadi C25 C26 C25' C26 
size 0.42 0.32 0.26 
conf O1 C9 C10 O2 
conf O1 C9' C10 O2 
conf O3 C15 C16 O4 
conf O3 C15' C16 O4 
conf O5 C21 C22 O6 
htab O5 O6_$3 
htab O3 O2_$2 
htab O1 O4_$1 
eqiv $3 -x+1, -y+1, -z 
eqiv $2 -x+1, y-1/2, -z+1/2 
eqiv $1 -x+1, y+1/2, -z+1/2 
htab 
TEMP 0 
WGHT    0.037200    1.727300 
FVAR       0.11559   0.68788   0.64592   0.50766   0.75801   0.77861 
MOLE 1 
CD1   5    0.075439    0.857355    0.123268    11.00000    0.04505    0.04703 = 
         0.04252    0.00208   -0.00103    0.00498 
CD2   5    0.592216    0.700087    0.199551    11.00000    0.04536    0.04451 = 
         0.04008   -0.00684    0.00170    0.00144 
CD3   5    0.489536    0.365862    0.132824    11.00000    0.04728    0.04249 = 
         0.03945   -0.00124    0.00177   -0.00266 
CD4   5    0.984618    0.198126    0.063241    11.00000    0.04984    0.04690 = 
         0.03940   -0.00182   -0.00316    0.00259 
N1    3    0.386386    0.757140    0.159644    11.00000    0.05415    0.06696 = 
         0.06010   -0.00600   -0.00899    0.01541 
N2    3   -0.135643    0.793501    0.143240    11.00000    0.06965    0.06918 = 
         0.06488   -0.00027   -0.00203    0.00228 
N3    3    0.542674    0.562664    0.179828    11.00000    0.06002    0.06073 = 
         0.04935   -0.00005   -0.00445    0.00064 
N4    3    0.476699    0.293642    0.201316    11.00000    0.07379    0.06116 = 
         0.04721    0.01174    0.00275   -0.01113 
N5    3    0.693653    0.297516    0.109932    11.00000    0.06624    0.06465 = 
         0.05239    0.00499   -0.00380    0.00039 
N6    3    1.179482    0.276066    0.089638    11.00000    0.06918    0.06499 = 
         0.06394   -0.00235    0.00277    0.00078 
N7    3    0.062725    0.811347    0.048101    11.00000    0.07011    0.07893 = 
         0.04243   -0.00599   -0.00335    0.01297 
N8    3    1.021359    0.064054    0.090643    11.00000    0.06978    0.08023 = 
         0.05684   -0.00283    0.00211   -0.00227 
C1    1    0.283643    0.791836    0.146095    11.00000    0.05174    0.05219 = 
         0.04649   -0.00664   -0.00404    0.00583 
C2    1    0.764210    0.760464    0.158824    11.00000    0.04656    0.05557 = 
         0.04842    0.00614    0.00824   -0.00531 
C3    1    0.520654    0.494340    0.165227    11.00000    0.05586    0.03621 = 
         0.03508   -0.00488   -0.00110   -0.00292 
C4    1    0.543688    0.761146    0.264949    11.00000    0.05931    0.04648 = 
         0.04470   -0.00658    0.00169    0.00700 
C5    1    0.793391    0.261762    0.095346    11.00000    0.04442    0.05000 = 
         0.04301   -0.00351    0.00237    0.00896 
C6    1    0.281699    0.311881    0.104154    11.00000    0.04286    0.05113 = 
         0.04848   -0.00289   -0.00559   -0.00848 
C7    1    0.953399    0.196345   -0.010292    11.00000    0.05254    0.06140 = 
         0.04581   -0.00386   -0.00006    0.00959 
C8    1    0.043359    0.994323    0.103026    11.00000    0.05843    0.03838 = 
         0.04575    0.00946   -0.00069    0.00258 
part 1 
C9    1    0.173993    0.902285    0.241319    51.00000    0.08431    0.07642 = 
         0.06139   -0.00892   -0.01318    0.02218 
AFIX  23 
H9A   2    0.219317    0.845351    0.236261    51.00000   -1.20000 
H9B   2    0.254090    0.945244    0.242908    51.00000   -1.20000 
AFIX   0 
part 2 
C9'   1    0.061776    0.868253    0.235873   -51.00000    0.08431    0.07642 = 
         0.06139   -0.00892   -0.01318    0.02218 
AFIX  23 
H9'1  2    0.119719    0.815964    0.229667   -51.00000   -1.20000 
H9'2  2   -0.042492    0.850797    0.236193   -51.00000   -1.20000 
AFIX   0 
part 0 
C10   1    0.106671    0.900340    0.282939    11.00000    0.15842    0.07583 = 
         0.07275    0.01343   -0.02386   -0.00722 
part 1 
AFIX  23 
H10A  2    0.175744    0.875497    0.305469    21.00000   -1.20000 
H10B  2    0.019207    0.862701    0.280920    21.00000   -1.20000 
AFIX  23 
part 2 
H10C  2    0.067794    0.858641    0.304521   -21.00000   -1.20000 
H10D  2    0.214896    0.897408    0.285690   -21.00000   -1.20000 
AFIX   0 
part 1 
C11   1   -0.018758    0.974761    0.337303    21.00000    0.13369    0.07793 = 
         0.07992    0.02805    0.02509    0.00137 
AFIX  23 
H11A  2    0.039566    0.942481    0.360026    21.00000   -1.20000 
H11B  2   -0.110789    0.942778    0.330900    21.00000   -1.20000 
AFIX   0 
C12   1   -0.053213    1.064905    0.354429    21.00000    0.15155    0.07878 = 
         0.08879    0.01298    0.04714    0.00911 
AFIX  23 
H12A  2   -0.113547    1.095399    0.331510    21.00000   -1.20000 
H12B  2    0.039845    1.097072    0.358498    21.00000   -1.20000 
AFIX   0 
part 2 
C11'  1   -0.069671    1.014670    0.322198   -21.00000    0.13369    0.07793 = 
         0.07992    0.02805    0.02509    0.00137 
AFIX  23 
H11C  2   -0.104633    1.070766    0.310406   -21.00000   -1.20000 
H11D  2   -0.150531    0.972401    0.319201   -21.00000   -1.20000 
AFIX   0 
C12'  1   -0.019241    1.023486    0.370951   -21.00000    0.15155    0.07878 = 
         0.08879    0.01298    0.04714    0.00911 
AFIX  23 
H12C  2    0.002751    0.965670    0.383293   -21.00000   -1.20000 
H12D  2    0.072043    1.057884    0.372758   -21.00000   -1.20000 
AFIX   0 
part 0 
C13   1   -0.134706    1.066440    0.398625    11.00000    0.15861    0.17579 = 
         0.11019    0.00304    0.02901    0.01917 
part 1 
AFIX  23 
H13A  2   -0.169342    1.126374    0.402182    21.00000   -1.20000 
H13B  2   -0.223615    1.030883    0.393499    21.00000   -1.20000 
AFIX  23 
part 2 
H13C  2   -0.136265    1.129727    0.394741   -21.00000   -1.20000 
H13D  2   -0.233828    1.042554    0.392537   -21.00000   -1.20000 
AFIX   0 
part 0 
C14   1   -0.076604    1.041616    0.440905    11.00000    0.14845    0.19756 = 
         0.15533    0.03169    0.01106    0.00745 
part 1 
AFIX  33 
H14A  2   -0.151583    1.048917    0.463254    21.00000   -1.50000 
H14B  2   -0.046445    0.981122    0.439967    21.00000   -1.50000 
H14C  2    0.008409    1.077636    0.448743    21.00000   -1.50000 
AFIX  33 
part 2 
H14D  2   -0.138851    1.064294    0.464177   -21.00000   -1.50000 
H14E  2   -0.073534    0.978668    0.442806   -21.00000   -1.50000 
H14F  2    0.022766    1.064713    0.444981   -21.00000   -1.50000 
AFIX   0 
part 1 
C15   1    0.872865    0.653058    0.287943    61.00000    0.08870    0.07023 = 
         0.06231   -0.00773   -0.01738    0.02033 
AFIX  23 
H15A  2    0.832210    0.709260    0.297008    61.00000   -1.20000 
H15B  2    0.837232    0.609061    0.308852    61.00000   -1.20000 
AFIX   0 
part 2 
C15'  1    0.917803    0.691735    0.256693   -61.00000    0.08870    0.07023 = 
         0.06231   -0.00773   -0.01738    0.02033 
AFIX  23 
H15C  2    0.866837    0.742261    0.269027   -61.00000   -1.20000 
H15D  2    0.972388    0.711533    0.230626   -61.00000   -1.20000 
AFIX   0 
part 0 
C16   1    1.028525    0.657045    0.292274    11.00000    0.11976    0.07534 = 
         0.10823    0.00740   -0.05480   -0.01839 
part 1 
AFIX  23 
H16A  2    1.066943    0.693862    0.268400    31.00000   -1.20000 
H16B  2    1.056886    0.683436    0.321238    31.00000   -1.20000 
AFIX  23 
part 2 
H16C  2    1.110904    0.698485    0.293928   -31.00000   -1.20000 
H16D  2    0.979625    0.660119    0.321186   -31.00000   -1.20000 
AFIX   0 
part 1 
part 1 
C17   1    1.251763    0.567101    0.279143    31.00000    0.06379    0.22888 = 
         0.17534    0.08026    0.00549   -0.00365 
AFIX  23 
H17A  2    1.262639    0.535417    0.250861    31.00000   -1.20000 
H17B  2    1.292944    0.625533    0.275423    31.00000   -1.20000 
AFIX   0 
C18   1    1.328245    0.524661    0.313067    31.00000    0.09884    0.25864 = 
         0.20066    0.08410   -0.00835    0.04399 
AFIX  23 
H18A  2    1.282494    0.467054    0.315043    31.00000   -1.20000 
H18B  2    1.303868    0.555266    0.340768    31.00000   -1.20000 
AFIX   0 
C19   1    1.479405    0.510346    0.315968    31.00000    0.08916    0.19632 = 
         0.19203    0.07623    0.00789    0.02382 
AFIX  23 
H19A  2    1.530292    0.546203    0.294006    31.00000   -1.20000 
H19B  2    1.501810    0.449067    0.310193    31.00000   -1.20000 
AFIX   0 
part 2 
C17'  1    1.242949    0.581859    0.300543   -31.00000    0.06379    0.22888 = 
         0.17534    0.08026    0.00549   -0.00365 
AFIX  23 
H17C  2    1.256115    0.592859    0.332848   -31.00000   -1.20000 
H17D  2    1.283682    0.631553    0.284406   -31.00000   -1.20000 
AFIX   0 
C18'  1    1.322392    0.503688    0.288817   -31.00000    0.09884    0.25864 = 
         0.20066    0.08410   -0.00835    0.04399 
AFIX  23 
H18C  2    1.403531    0.513350    0.268261   -31.00000   -1.20000 
H18D  2    1.258657    0.455608    0.278598   -31.00000   -1.20000 
AFIX   0 
C19'  1    1.373784    0.498192    0.340932   -31.00000    0.08916    0.19632 = 
         0.19203    0.07623    0.00789    0.02382 
AFIX  23 
H19C  2    1.295822    0.526772    0.357738   -31.00000   -1.20000 
H19D  2    1.370394    0.436451    0.349008   -31.00000   -1.20000 
AFIX   0 
part 0 
C20   1    1.525759    0.534105    0.361242    11.00000    0.14557    0.25895 = 
         0.24064    0.04626   -0.02212    0.03121 
part 1 
AFIX  33 
H20A  2    1.631635    0.525256    0.365132    31.00000   -1.50000 
H20B  2    1.502529    0.594796    0.366431    31.00000   -1.50000 
H20C  2    1.474203    0.498196    0.382529    31.00000   -1.50000 
AFIX  33 
part 2 
H20D  2    1.531165    0.523149    0.393342   -31.00000   -1.50000 
H20E  2    1.607249    0.504983    0.347006   -31.00000   -1.50000 
H20F  2    1.531954    0.596179    0.355820   -31.00000   -1.50000 
AFIX   0 
part 0 
C21   1    0.637715    0.505353    0.056300    11.00000    0.06122    0.08069 = 
         0.06650    0.01853   -0.00469   -0.00523 
AFIX  23 
H21A  2    0.679988    0.492856    0.027049    11.00000   -1.20000 
H21B  2    0.712199    0.490618    0.079669    11.00000   -1.20000 
AFIX   0 
C22   1    0.601853    0.601897    0.059114    11.00000    0.09622    0.07357 = 
         0.05542    0.00909   -0.01677   -0.02579 
AFIX  23 
H22A  2    0.540282    0.612652    0.085099    11.00000   -1.20000 
H22B  2    0.693759    0.635146    0.063287    11.00000   -1.20000 
AFIX   0 
C23   1    0.450867    0.711486    0.023226    11.00000    0.16643    0.08266 = 
         0.08037   -0.00623   -0.01438    0.02011 
part 1 
AFIX  23 
H23A  2    0.367995    0.699452    0.042807    41.00000   -1.20000 
H23B  2    0.406352    0.722208   -0.006686    41.00000   -1.20000 
AFIX  23 
part 2 
H23C  2    0.403275    0.717376    0.052234   -41.00000   -1.20000 
H23D  2    0.377491    0.720526   -0.001234   -41.00000   -1.20000 
AFIX   0 
part 1 
part 1 
C24   1    0.506336    0.794509    0.037774    41.00000    0.12328    0.06353 = 
         0.10798   -0.00347    0.02919    0.01879 
AFIX  23 
H24A  2    0.553234    0.789064    0.067754    41.00000   -1.20000 
H24B  2    0.424271    0.835900    0.039622    41.00000   -1.20000 
AFIX   0 
C25   1    0.613947    0.826573    0.006215    41.00000    0.10770    0.10526 = 
         0.21457    0.00619    0.05558   -0.00128 
AFIX  23 
H25A  2    0.568277    0.825880   -0.024062    41.00000   -1.20000 
H25B  2    0.698157    0.786406    0.006296    41.00000   -1.20000 
AFIX   0 
part 2 
C24'  1    0.593841    0.776920    0.019165   -41.00000    0.12328    0.06353 = 
         0.10798   -0.00347    0.02919    0.01879 
AFIX  23 
H24C  2    0.662693    0.768483    0.044854   -41.00000   -1.20000 
H24D  2    0.646406    0.764498   -0.008445   -41.00000   -1.20000 
AFIX   0 
C25'  1    0.537955    0.867897    0.018420   -41.00000    0.10770    0.10526 = 
         0.21457    0.00619    0.05558   -0.00128 
AFIX  23 
H25C  2    0.483276    0.880743    0.045585   -41.00000   -1.20000 
H25D  2    0.472857    0.877999   -0.007985   -41.00000   -1.20000 
AFIX   0 
part 0 
C26   1    0.674791    0.922482    0.016444    11.00000    0.13019    0.14995 = 
         0.30498    0.05249    0.01416    0.00637 
part 1 
AFIX  33 
H26A  2    0.745366    0.938586   -0.006032    41.00000   -1.50000 
H26B  2    0.592886    0.963274    0.015577    41.00000   -1.50000 
H26C  2    0.723002    0.923728    0.045989    41.00000   -1.50000 
AFIX  33 
part 2 
H26D  2    0.647530    0.983490    0.015853   -41.00000   -1.50000 
H26E  2    0.737921    0.911023    0.042699   -41.00000   -1.50000 
H26F  2    0.727574    0.908298   -0.010499   -41.00000   -1.50000 
AFIX   0 
part 0 
O1    4    0.077743    0.922933    0.202208    11.00000    0.10428    0.06478 = 
         0.04929   -0.01009   -0.00960    0.02214 
H1HY  2    0.032765    0.968651    0.205783    11.00000   -1.50000 
O2    4    0.064078    0.983799    0.296774    11.00000    0.11070    0.07477 = 
         0.05720   -0.01031    0.01177   -0.02224 
O3    4    0.814701    0.632313    0.242680    11.00000    0.08194    0.06489 = 
         0.07300   -0.01412   -0.02709    0.02451 
H3HY  2    0.850173    0.587676    0.232940    11.00000   -1.50000 
O4    4    1.091359    0.573745    0.289557    11.00000    0.05899    0.08248 = 
         0.10825    0.02492   -0.01932   -0.00886 
O5    4    0.508874    0.452248    0.061843    11.00000    0.06393    0.06504 = 
         0.04232    0.00327   -0.00183   -0.00857 
H5HY  2    0.479256    0.429378    0.038591    11.00000   -1.50000 
O6    4    0.525664    0.630052    0.019275    11.00000    0.09764    0.06715 = 
         0.04360   -0.00165   -0.00978    0.00357 
HKLF 4 
  
REM  ino_3 in P2(1)/c 
REM R1 =  0.0326 for    7933 Fo > 4sig(Fo)  and  0.0445 for all    9947 data 
REM    438 parameters refined using     63 restraints 
  
END 
  
WGHT      0.0372      1.6520 
  
REM Instructions for potential hydrogen bonds 
HTAB O1 O4_$1 
HTAB O3 O2_$2 
HTAB O5 O6_$3 
  
REM Highest difference peak  0.501,  deepest hole -0.688,  1-sigma level  0.093 
Q1    1   1.3202  0.5680  0.3335  11.00000  0.05    0.50 
Q2    1   0.2259  0.3171  0.1098  11.00000  0.05    0.42 
Q3    1   0.6980  0.7507  0.1573  11.00000  0.05    0.40 
Q4    1   0.4806  0.7812  0.0013  11.00000  0.05    0.40 
Q5    1   0.2797  0.3029  0.0901  11.00000  0.05    0.40 
Q6    1   0.0021  0.9955  0.0944  11.00000  0.05    0.39 
Q7    1   0.7499  0.7834  0.1477  11.00000  0.05    0.38 
Q8    1   0.7807  0.2523  0.1091  11.00000  0.05    0.38 
Q9    1   0.1484  0.8811  0.1271  11.00000  0.05    0.37 
Q10   1   0.7616  0.7589  0.1787  11.00000  0.05    0.36 
Q11   1   0.8216  0.2411  0.0825  11.00000  0.05    0.36 
Q12   1   1.0498  0.1786  0.0600  11.00000  0.05    0.36 
Q13   1   0.7980  0.7436  0.1473  11.00000  0.05    0.36 
Q14   1   0.0737  1.0020  0.0895  11.00000  0.05    0.35 
Q15   1   0.7484  0.2632  0.0914  11.00000  0.05    0.35 
Q16   1   0.6547  0.7396  0.2022  11.00000  0.05    0.33 
Q17   1   0.7967  0.7716  0.1652  11.00000  0.05    0.33 
Q18   1   0.3335  0.3373  0.0998  11.00000  0.05    0.32 
Q19   1   0.0153  0.8891  0.1182  11.00000  0.05    0.32 
Q20   1   0.2418  0.3563  0.0822  11.00000  0.05    0.32 
; 
_shelx_res_checksum   71459 
  
_shelx_hkl_file 
; 
   1   0   0    7.43    0.50 
  -1   0   0    6.65    0.45 
  -1   0   0    6.74    0.51 
  -2   0   0 5330.00  133.57 
   2   0   0 5234.77  123.49 
  -3   0   0    1.85    0.31 
   3   0   0    1.22    0.28 
   4   0   0  374.60    9.36 
  -4   0   0  383.63    9.99 
   5   0   0   13.12    0.90 
  -5   0   0   13.15    0.90 
   6   0   0   -0.02    0.55 
  -6   0   0   -0.42    0.47 
  -7   0   0   35.06    1.82 
   7   0   0   37.65    1.87 
   8   0   0    9.72    1.14 
  -8   0   0   11.34    1.19 
  -9   0   0   40.35    2.19 
   9   0   0   39.74    2.21 
 -10   0   0   55.48    2.85 
  10   0   0   60.06    2.93 
  11   0   0    4.43    1.08 
 -11   0   0    2.80    0.94 
   0   1   0   -0.60    0.08 
  -1  -1   0    6.86    0.26 
   1  -1   0    6.88    0.30 
   1   1   0    6.45    0.32 
  -1  -1   0    6.71    0.33 
   1   1   0    7.75    0.27 
   2   1   0 1513.10   34.84 
  -2  -1   0 1512.98   37.49 
  -2   1   0 1496.48   37.47 
  -2  -1   0 1513.38   38.76 
   2  -1   0 1486.47   34.80 
   2   1   0 1522.46   39.15 
   3  -1   0    3.78    0.40 
  -3   1   0    5.07    0.46 
   3   1   0    4.06    0.43 
  -3  -1   0    4.18    0.43 
   3   1   0    3.62    0.21 
   4  -1   0 1526.44   34.70 
   4   1   0 1447.01   34.69 
  -4   1   0 1505.86   37.28 
  -4  -1   0 1476.89   37.28 
   5   1   0   56.91    2.12 
  -5   1   0   57.06    2.16 
  -5  -1   0   58.30    2.16 
   5  -1   0   56.35    2.06 
   6   1   0   97.63    3.30 
   6  -1   0   96.96    3.27 
  -6  -1   0   98.91    3.41 
  -6   1   0  103.22    3.41 
  -7  -1   0   29.25    1.66 
   7  -1   0   34.00    1.72 
  -7   1   0   30.53    1.71 
   7   1   0   28.86    1.65 
  -8   1   0    4.83    0.84 
   8   1   0    3.96    0.87 
  -8  -1   0    4.41    0.87 
   8  -1   0    2.87    0.80 
  -9   1   0    0.01    0.54 
   9   1   0    0.12    0.64 
   9  -1   0    0.20    0.63 
  -9  -1   0    0.48    0.58 
  10  -1   0   -0.10    0.74 
  10   1   0   -0.10    0.65 
 -10  -1   0    0.16    0.68 
 -10   1   0   -0.36    0.60 
 -11  -1   0    1.93    0.86 
 -11   1   0    0.71    0.76 
  11   1   0    1.43    0.86 
  11  -1   0    1.42    0.83 
   0   2   0  975.02   22.73 
   1  -2   0   11.62    0.46 
   1   2   0   11.58    0.49 
   1   2   0   12.50    0.52 
  -2  -2   0   92.41    2.65 
   2   2   0   88.65    2.49 
   2   2   0   94.65    2.45 
   2  -2   0   90.36    2.42 
  -3   2   0   87.12    2.63 
  -3  -2   0   87.93    2.68 
   3   2   0   85.90    2.31 
   3   2   0   85.39    2.54 
   3  -2   0   87.46    2.47 
   4   2   0    2.81    0.46 
  -4   2   0    3.55    0.47 
   4   2   0    3.81    0.25 
  -4  -2   0    2.89    0.48 
   4  -2   0    2.72    0.45 
   5  -2   0  307.01    7.88 
   5   2   0  299.20    7.95 
  -5  -2   0  315.39    8.47 
  -5   2   0  306.23    8.41 
  -6   2   0   10.68    0.92 
   6  -2   0    8.01    0.87 
  -6  -2   0    7.34    0.88 
   6   2   0    8.89    0.89 
   7   2   0   56.50    2.46 
   7  -2   0   52.17    2.26 
  -7   2   0   55.54    2.40 
  -7  -2   0   49.61    2.34 
  -8  -2   0    2.68    0.75 
  -8   2   0    2.46    0.67 
   8  -2   0    2.02    0.71 
   8   2   0    1.34    0.69 
  -9   2   0    1.58    0.72 
   9  -2   0    0.88    0.73 
  -9  -2   0    1.68    0.71 
   9   2   0    0.35    0.79 
  10  -2   0   18.67    1.60 
 -10  -2   0   16.62    1.62 
  10   2   0   18.01    1.69 
 -10   2   0   19.36    1.61 
  11   2   0    1.22    0.91 
 -11  -2   0    2.66    0.88 
  11  -2   0    1.34    0.86 
   0   3   0    0.03    0.18 
   1   3   0  183.03    4.86 
   1   3   0  186.29    4.57 
  -1   3   0  179.22    4.47 
  -1   3   0  184.84    4.39 
   2  -3   0  187.66    4.59 
   2   3   0  179.57    4.68 
   2   3   0  184.99    4.82 
   3  -3   0  195.30    5.00 
  -3  -3   0  193.66    5.44 
   3   3   0  204.20    5.11 
   3   3   0  193.33    5.13 
   4   3   0    2.93    0.26 
   4  -3   0    2.24    0.40 
  -4  -3   0    2.42    0.46 
   4   3   0    3.45    0.52 
  -4   3   0    2.61    0.43 
   5  -3   0   -0.08    0.42 
  -5   3   0    0.97    0.49 
   5   3   0    0.76    0.47 
  -5  -3   0    0.08    0.48 
  -6  -3   0    0.57    0.43 
   6   3   0   -0.09    0.36 
   6  -3   0    0.41    0.41 
  -6   3   0    0.55    0.40 
  -7  -3   0   90.91    3.40 
  -7   3   0   76.60    3.20 
   7   3   0   91.54    3.35 
   7  -3   0   95.19    3.22 
  -8   3   0    0.18    0.43 
   8  -3   0    0.29    0.49 
   8   3   0   -0.34    0.48 
  -8  -3   0    1.83    0.63 
  -9   3   0   43.56    2.36 
   9  -3   0   45.58    2.36 
  -9  -3   0   44.48    2.45 
   9   3   0   42.99    2.46 
  10  -3   0    0.36    0.65 
 -10   3   0    0.68    0.62 
  10   3   0    0.90    0.75 
 -10  -3   0    1.17    0.76 
  11   3   0   12.35    1.63 
  11  -3   0    9.07    1.40 
 -11  -3   0   14.46    1.60 
   0   4   0   53.93    1.59 
   1   4   0   14.47    0.71 
  -1   4   0   14.59    0.60 
   1   4   0   14.92    0.73 
  -1   4   0   14.92    0.62 
   2   4   0  237.27    6.08 
   2  -4   0  225.77    5.67 
   2   4   0  227.97    5.82 
   3  -4   0  395.45    9.57 
   3   4   0  394.92   10.06 
   3   4   0  394.23    9.74 
   4  -4   0   18.73    0.99 
   4   4   0   20.87    1.12 
   4   4   0   19.00    0.79 
  -5  -4   0  490.17   12.92 
  -5   4   0  488.00   12.84 
   5   4   0  479.04   12.17 
   5  -4   0  493.79   11.92 
   5   4   0  467.46   12.10 
   6  -4   0    0.15    0.41 
  -6   4   0    0.14    0.37 
  -6  -4   0   -0.08    0.38 
   6   4   0    0.07    0.41 
  -7  -4   0  181.54    5.65 
   7  -4   0  173.61    5.18 
  -7   4   0  174.45    5.53 
   7   4   0  168.17    5.35 
  -8   4   0    1.65    0.64 
   8   4   0    2.24    0.75 
  -8  -4   0    1.67    0.66 
   8  -4   0    0.76    0.58 
   9  -4   0   19.58    1.59 
  -9  -4   0   17.85    1.62 
  -9   4   0   18.45    1.55 
   9   4   0   20.28    1.65 
 -10  -4   0    1.01    0.69 
  10  -4   0    0.65    0.71 
  10   4   0    0.53    0.74 
 -10   4   0    1.49    0.67 
  11  -4   0    0.35    0.82 
 -11  -4   0    1.20    0.81 
  11   4   0    1.45    0.89 
   0   5   0   -0.22    0.20 
  -1   5   0    0.16    0.20 
   1   5   0    0.14    0.21 
   1   5   0    0.07    0.22 
   2   5   0   97.94    2.93 
   2   5   0   97.88    2.84 
   3   5   0   75.53    2.31 
   3   5   0   71.58    2.39 
   3  -5   0   75.25    2.25 
   4  -5   0  176.72    4.78 
   4   5   0  184.17    4.87 
   4   5   0  175.95    5.01 
   5   5   0   28.34    1.49 
   5   5   0   27.32    1.05 
   5  -5   0   26.32    1.31 
  -5   5   0   27.54    1.46 
   6   5   0   27.79    1.68 
   6  -5   0   29.40    1.50 
  -6   5   0   28.13    1.49 
  -6   5   0   30.51    1.64 
   7  -5   0    3.13    0.69 
  -7   5   0    3.96    0.78 
  -7   5   0    4.10    0.63 
   7   5   0    3.86    0.81 
   8   5   0    0.24    0.71 
  -8   5   0    0.03    0.58 
   8  -5   0    0.95    0.63 
  -9   5   0   19.13    1.55 
   9  -5   0   18.79    1.53 
   9   5   0   18.49    1.60 
  10   5   0    0.19    0.70 
  10  -5   0    0.47    0.70 
 -10   5   0    1.57    0.76 
  11   5   0   10.48    1.59 
  11  -5   0   13.59    1.54 
   0   6   0  427.35   10.40 
   0   6   0  434.82   11.34 
  -1   6   0   37.93    1.34 
   1   6   0   37.72    1.56 
   1   6   0   41.63    1.47 
  -2   6   0  423.89   10.17 
   2   6   0  420.15   11.03 
   2   6   0  426.88   10.40 
  -2   6   0  420.95    9.97 
   3   6   0   44.90    1.68 
   3   6   0   46.86    1.81 
   3  -6   0   46.36    1.60 
   4   6   0   19.97    1.20 
   4  -6   0   18.41    1.02 
   4   6   0   20.01    1.00 
   5   6   0    8.70    0.90 
   5  -6   0    9.89    0.81 
   5   6   0   10.50    0.67 
  -6   6   0    0.44    0.52 
   6  -6   0    0.80    0.52 
  -6   6   0    0.23    0.44 
   6   6   0    0.34    0.54 
  -7   6   0    5.51    0.88 
   7   6   0    7.40    1.02 
   7  -6   0    6.07    0.81 
  -7   6   0    7.36    0.79 
   8  -6   0    1.14    0.74 
   8   6   0    0.66    0.73 
  -8   6   0    1.27    0.72 
   9  -6   0   10.30    1.19 
  -9   6   0    8.23    1.18 
   9   6   0    8.38    1.26 
 -10   6   0    4.86    1.00 
  10   6   0    2.67    1.02 
  10  -6   0    1.74    0.85 
  11  -6   0    0.62    0.75 
  11   6   0    0.79    0.84 
   0   7   0    0.78    0.31 
   0   7   0   -0.47    0.22 
   1   7   0    4.06    0.50 
  -1   7   0    4.17    0.47 
   1   7   0    3.76    0.53 
   2   7   0   64.39    2.35 
   2   7   0   69.18    2.28 
  -2   7   0   62.95    2.02 
   3   7   0    4.98    0.59 
  -3   7   0    6.52    0.56 
  -3   7   0    5.68    0.53 
   3   7   0    5.53    0.68 
   4  -7   0   49.91    1.84 
   4   7   0   47.25    1.86 
   4   7   0   48.73    2.10 
   5  -7   0   25.24    1.32 
   5   7   0   25.62    1.53 
   5   7   0   27.12    1.22 
   6   7   0    0.08    0.65 
   6  -7   0    0.99    0.59 
  -6   7   0   -0.87    0.51 
  -6   7   0    1.65    0.66 
   7  -7   0   52.42    2.24 
  -7   7   0   56.22    2.58 
   7   7   0   54.42    2.56 
  -7   7   0   53.17    2.36 
  -8   7   0    5.30    1.01 
   8  -7   0    3.25    0.83 
   8   7   0    3.61    1.03 
  -9   7   0   19.08    1.59 
   9  -7   0   15.57    1.40 
   9   7   0   16.90    1.67 
 -10   7   0    0.61    0.68 
  10   7   0    0.59    0.82 
  10  -7   0   -0.79    0.55 
  11   7   0    0.46    0.89 
   0   8   0    5.94    0.71 
   0   8   0    6.87    0.63 
  -1   8   0  109.80    3.15 
  -1   8   0  109.99    3.65 
   1   8   0  108.77    3.25 
   1   8   0  107.90    3.56 
  -2   8   0    1.25    0.37 
   2   8   0    0.26    0.41 
   2   8   0    0.88    0.44 
  -3   8   0  439.64   10.56 
  -3   8   0  433.15   10.75 
   3   8   0  450.66   11.72 
   3   8   0  441.43   11.14 
   4   8   0   12.86    1.07 
   4   8   0   12.05    0.91 
   5   8   0  353.53    9.18 
   5  -8   0  338.40    8.74 
   5   8   0  320.51    9.07 
  -5   8   0  348.19    9.62 
  -6   8   0    7.38    0.93 
   6   8   0    8.96    1.11 
   6  -8   0    7.25    0.85 
   7   8   0  208.52    6.48 
   7  -8   0  206.96    6.01 
  -7   8   0  212.73    6.71 
   8  -8   0    0.65    0.59 
  -8   8   0    0.18    0.60 
   8   8   0    0.94    0.72 
  -9   8   0   10.83    1.36 
   9   8   0    7.94    1.34 
   9  -8   0   11.02    1.24 
 -10   8   0    1.94    0.76 
  10   8   0    0.91    0.81 
   0   9   0   -0.01    0.33 
   0   9   0   -0.26    0.34 
   1   9   0   38.98    1.66 
  -1   9   0   38.11    1.91 
  -1   9   0   41.23    1.60 
   1   9   0   37.46    1.90 
  -2   9   0   16.47    0.94 
   2   9   0   13.85    1.09 
   2   9   0   15.32    1.07 
  -2   9   0   14.24    1.13 
   3   9   0  166.26    4.86 
  -3   9   0  161.16    5.25 
  -3   9   0  164.51    4.49 
   3   9   0  163.80    5.01 
   4   9   0    0.03    0.44 
  -4   9   0    0.49    0.34 
  -4   9   0    0.24    0.38 
   4   9   0   -0.42    0.30 
  -4   9   0    0.13    0.32 
   5  -9   0    0.25    0.48 
   5   9   0    0.78    0.56 
   5   9   0    0.17    0.39 
  -5   9   0    1.01    0.56 
   6  -9   0    6.99    0.86 
  -6   9   0    6.86    0.94 
   6   9   0    7.39    1.07 
   7   9   0   94.93    3.81 
  -7   9   0   93.44    3.69 
   7  -9   0  101.40    3.46 
  -7   9   0   92.95    3.84 
   8   9   0    1.08    0.76 
  -8   9   0    1.07    0.66 
   8  -9   0    0.02    0.54 
  -9   9   0   71.61    3.42 
   9   9   0   69.79    3.48 
 -10   9   0    3.57    0.93 
  10   9   0    2.29    1.09 
   0  10   0   75.90    2.59 
   0  10   0   79.77    3.07 
  -1  10   0    0.01    0.33 
   1  10   0    0.24    0.40 
   1  10   0    1.03    0.45 
  -1  10   0   -0.63    0.32 
  -2  10   0    7.76    0.72 
   2  10   0    5.84    0.81 
  -2  10   0    6.14    0.90 
   2  10   0    7.18    0.81 
  -3  10   0  220.11    5.87 
  -3  10   0  222.26    6.79 
   3  10   0  217.83    6.52 
   3  10   0  222.04    6.28 
  -4  10   0    0.92    0.57 
  -4  10   0    1.43    0.49 
   4  10   0    1.17    0.55 
  -4  10   0    1.45    0.48 
   4  10   0    0.29    0.45 
   5  10   0  294.61    8.21 
  -5  10   0  289.77    7.60 
  -5  10   0  289.77    8.59 
   5  10   0  282.48    8.11 
   6  10   0    0.97    0.61 
  -6  10   0    0.21    0.60 
  -7  10   0  155.08    5.32 
   7 -10   0  151.68    4.78 
   7  10   0  147.50    5.31 
  -7  10   0  154.65    5.50 
   8  10   0    7.03    1.25 
  -8  10   0    5.06    1.04 
   9  10   0    4.04    1.17 
  -9  10   0    3.01    0.99 
 -10  10   0    5.16    1.20 
  10  10   0    4.19    1.16 
   0  11   0    0.59    0.45 
   0  11   0    0.29    0.39 
   1  11   0   30.06    1.71 
   1  11   0   29.39    1.49 
  -1  11   0   25.11    1.33 
  -1  11   0   28.82    1.77 
   2  11   0   28.64    1.55 
   2  11   0   24.58    1.59 
  -2  11   0   26.92    1.73 
  -2  11   0   28.58    1.39 
   3  11   0   82.80    3.04 
  -3  11   0   78.24    2.66 
  -3  11   0   82.90    3.33 
   3  11   0   75.61    3.06 
   4  11   0   31.25    1.76 
   4  11   0   30.21    1.83 
  -4  11   0   29.16    1.49 
  -4  11   0   28.44    1.93 
   5  11   0    0.05    0.47 
   5  11   0    0.46    0.59 
  -5  11   0    0.45    0.48 
  -5  11   0   -0.18    0.43 
  -5  11   0   -0.79    0.48 
   6  11   0    1.27    0.80 
  -6  11   0    0.77    0.51 
  -6  11   0   -0.24    0.66 
  -6  11   0    0.56    0.57 
   7  11   0   29.81    2.13 
  -7  11   0   30.86    2.06 
   8  11   0    0.08    0.77 
  -8  11   0    0.38    0.67 
  -9  11   0   18.40    1.75 
   9  11   0   18.73    1.99 
  10  11   0    3.54    1.25 
   0  12   0  397.47   10.87 
   0  12   0  355.97    9.59 
  -1  12   0   44.32    2.29 
   1  12   0   42.22    2.20 
   1  12   0   43.94    1.94 
  -1  12   0   41.12    1.81 
   2  12   0  160.24    4.99 
  -2  12   0  168.40    4.78 
  -2  12   0  170.46    5.67 
   2  12   0  169.99    5.50 
   3  12   0    2.47    0.69 
  -3  12   0    3.11    0.79 
   3  12   0    2.57    0.69 
  -3  12   0    2.35    0.59 
   4  12   0   25.88    1.69 
  -4  12   0   23.14    1.33 
   4  12   0   21.78    1.52 
  -4  12   0   25.57    1.80 
  -5  12   0    1.45    0.72 
   5  12   0    1.90    0.77 
   5  12   0    1.01    0.55 
  -6  12   0    4.93    1.07 
   6  12   0    5.14    1.09 
  -7  12   0    0.94    0.80 
   7  12   0    3.44    1.07 
  -8  12   0    8.53    1.43 
   8  12   0    7.73    1.44 
   9  12   0    3.60    1.19 
  -9  12   0    4.20    1.05 
   0  13   0    1.22    0.54 
   0  13   0    0.63    0.58 
   1  13   0   -0.02    0.50 
  -1  13   0   -0.54    0.48 
  -1  13   0   -0.31    0.40 
   1  13   0    0.94    0.52 
   2  13   0   38.31    2.16 
  -2  13   0   42.92    2.40 
  -2  13   0   43.57    1.87 
   2  13   0   41.07    2.00 
  -3  13   0    0.66    0.51 
   3  13   0    0.40    0.57 
  -3  13   0    0.50    0.58 
   3  13   0    0.55    0.54 
   4  13   0   74.75    3.18 
  -4  13   0   79.66    3.52 
   4  13   0   75.34    3.13 
  -5  13   0    0.38    0.78 
   5  13   0    0.54    0.61 
   5  13   0    0.81    0.73 
  -6  13   0    3.14    1.02 
   6  13   0    2.12    0.99 
  -7  13   0   -0.47    0.64 
   7  13   0    0.16    0.82 
   8  13   0   -0.15    0.88 
  -8  13   0    1.38    0.76 
  -9  13   0    1.47    0.92 
   9  13   0    0.04    0.81 
   0  14   0  216.11    7.09 
   0  14   0  223.22    6.24 
   1  14   0   -0.35    0.54 
  -1  14   0   -0.18    0.49 
   1  14   0   -0.04    0.58 
  -1  14   0   -1.30    0.49 
   2  14   0   85.74    3.25 
  -2  14   0   87.13    3.04 
   2  14   0   86.95    3.66 
  -2  14   0   94.43    3.92 
   3  14   0    2.91    0.86 
  -3  14   0    4.57    1.09 
   3  14   0    5.53    1.00 
  -4  14   0    3.04    0.92 
   4  14   0    3.27    0.92 
   4  14   0    3.07    0.88 
  -5  14   0   20.01    1.82 
   5  14   0   19.46    1.63 
   5  14   0   19.10    1.73 
   6  14   0   -0.28    0.74 
  -6  14   0   -0.20    0.66 
  -7  14   0   14.34    1.63 
   7  14   0   11.64    1.59 
   8  14   0    0.70    0.92 
  -8  14   0    1.07    0.77 
   0  15   0    1.38    0.74 
   0  15   0    1.73    0.64 
  -1  15   0    3.76    0.79 
   1  15   0    2.05    0.91 
  -1  15   0    2.81    0.94 
   1  15   0    4.84    0.95 
   2  15   0    3.41    0.86 
   2  15   0    4.09    1.00 
  -2  15   0    6.05    1.14 
  -3  15   0    9.19    1.33 
   3  15   0    6.64    1.20 
   3  15   0    7.88    1.14 
   4  15   0    5.67    1.06 
   4  15   0    5.62    1.06 
  -4  15   0    6.42    1.18 
   5  15   0    9.43    1.35 
  -5  15   0    9.65    1.43 
  -6  15   0   -0.59    0.68 
   6  15   0   -1.31    0.62 
   7  15   0    1.20    0.97 
  -7  15   0    0.93    0.85 
   8  15   0    1.61    0.99 
   0  16   0   39.72    2.46 
  -1  16   0    8.52    1.30 
   1  16   0    8.90    1.30 
   1  16   0    9.94    1.09 
   2  16   0   21.10    1.55 
  -2  16   0   21.60    1.85 
   2  16   0   22.88    1.81 
  -3  16   0    0.69    0.85 
   3  16   0    1.45    0.69 
   3  16   0    0.61    0.74 
  -4  16   0   12.35    1.60 
   4  16   0   10.26    1.33 
   4  16   0   10.66    1.32 
   5  16   0    0.84    0.92 
  -5  16   0    1.58    0.98 
  -6  16   0    3.57    1.15 
   6  16   0    3.67    1.13 
   7  16   0    0.36    0.91 
  -7  16   0    0.73    0.91 
   0  17   0   -0.27    0.66 
   1  17   0    0.34    0.70 
  -1  17   0   -0.32    0.60 
  -2  17   0   17.05    1.77 
   2  17   0   20.14    1.62 
   2  17   0   17.92    1.69 
   3  17   0    0.09    0.61 
   3  17   0    0.32    0.65 
  -3  17   0    0.49    0.73 
   4  17   0   20.88    1.84 
  -4  17   0   22.43    2.04 
   4  17   0   17.72    1.76 
   5  17   0    0.70    0.83 
  -5  17   0   -0.48    0.70 
   6  17   0    4.78    1.20 
  -6  17   0    2.56    1.12 
   0  18   0  101.39    4.49 
   1  18   0    0.93    0.78 
  -1  18   0    1.00    0.71 
   2  18   0   43.89    2.71 
  -2  18   0   42.46    2.77 
   3  18   0   -0.46    0.71 
  -3  18   0    0.58    0.78 
   4  18   0    3.91    1.07 
   4  18   0    4.14    1.05 
  -4  18   0    3.96    1.19 
   5  18   0    0.29    0.84 
  -5  18   0   -0.82    0.74 
   0  19   0    0.06    0.72 
   1  19   0    0.17    0.70 
  -1  19   0   -1.25    0.65 
   2  19   0   15.65    1.75 
  -2  19   0   16.50    1.91 
   3  19   0    0.49    0.72 
  -3  19   0   -0.08    0.81 
   4  19   0   15.34    1.75 
  -4  19   0   13.61    1.84 
   0  20   0   21.28    2.09 
   1  20   0    2.69    1.06 
  -1  20   0    3.32    1.20 
   2  20   0    4.39    1.16 
  -2  20   0    4.95    1.27 
  11   0  -1   -0.91    0.49 
 -11   0   1   -0.94    0.52 
 -10   0   1    2.07    0.86 
  10   0  -1    0.61    0.84 
   9   0  -1   -1.38    0.41 
  -9   0   1   -0.22    0.53 
   8   0  -1   -0.11    0.59 
  -8   0   1    0.46    0.60 
   7   0  -1    0.07    0.42 
  -7   0   1   -0.32    0.35 
  -6   0   1    0.63    0.57 
   6   0  -1    0.15    0.55 
   5   0  -1    0.25    0.32 
  -5   0   1   -0.38    0.26 
   4   0  -1   -0.14    0.37 
  -4   0   1   -0.14    0.36 
   3   0  -1   -0.19    0.18 
  -3   0   1    0.87    0.28 
  -2   0   1   -1.07    0.20 
   1   0  -1   -0.72    0.13 
  -1   0   1   -1.02    0.14 
   0   0   1    0.01    0.01 
   0   0  -1    0.00    0.01 
   1   0   1   -0.32    0.09 
  -1   0  -1    0.06    0.10 
   1   0   1   -0.28    0.07 
  -2   0  -1    0.32    0.17 
   2   0   1    0.48    0.13 
   2   0   1    0.03    0.19 
   3   0   1    1.11    0.32 
  -3   0  -1   -0.11    0.19 
  -4   0  -1   -0.42    0.31 
   4   0   1   -0.27    0.33 
  -5   0  -1   -0.07    0.31 
   5   0   1   -0.06    0.31 
   6   0   1   -0.11    0.50 
  -6   0  -1    0.76    0.54 
  -7   0  -1   -0.17    0.41 
   7   0   1    0.91    0.55 
   8   0   1    0.31    0.59 
  -8   0  -1    0.25    0.53 
  -9   0  -1   -0.23    0.55 
   9   0   1    0.63    0.59 
  10   0   1    1.11    0.80 
 -10   0  -1    0.63    0.64 
  11   0   1    0.16    0.78 
  11   1  -1    0.84    0.75 
 -11   1   1    0.58    0.65 
  11  -1  -1   -1.01    0.60 
 -11  -1   1    0.79    0.63 
  10   1  -1    3.29    1.00 
 -10  -1   1    1.80    0.92 
  10  -1  -1    2.98    0.99 
 -10   1   1    4.53    0.99 
   9  -1  -1    6.34    1.04 
  -9   1   1    5.11    0.98 
  -9  -1   1    5.96    1.02 
   9   1  -1    5.27    1.03 
   8  -1  -1    4.11    0.89 
   8   1  -1    6.19    0.97 
  -8   1   1    7.84    0.99 
  -8  -1   1    6.17    1.00 
  -7  -1   1    1.65    0.58 
   7   1  -1    0.18    0.51 
   7  -1  -1    1.29    0.54 
  -7   1   1    0.64    0.53 
  -6  -1   1    4.80    0.82 
   6   1  -1    5.12    0.77 
  -6   1   1    5.44    0.78 
  -6   1   1    4.45    0.39 
   6  -1  -1    4.00    0.78 
   5  -1  -1   61.46    2.18 
  -5   1   1   61.01    1.81 
   5   1  -1   62.26    2.22 
  -5  -1   1   60.25    2.29 
  -5   1   1   60.97    2.30 
   4   1  -1    6.12    0.62 
  -4  -1   1    5.13    0.64 
  -4   1   1    7.61    0.72 
   4  -1  -1    5.60    0.60 
   3  -1  -1 1114.27   25.89 
  -3   1   1 1107.32   27.88 
   3   1  -1 1124.68   25.96 
  -3  -1   1 1104.64   27.90 
   2  -1  -1   15.62    0.64 
   2   1  -1   14.81    0.69 
  -2   1   1   16.90    0.71 
  -2  -1   1   14.12    0.69 
   1   1  -1 1451.35   34.27 
  -1   1   1 1413.76   36.71 
   1  -1  -1 1406.26   33.78 
   1   1   1  529.27   12.31 
   1   1   1  526.01   13.28 
   1  -1   1  534.37   12.32 
  -1  -1  -1  514.42   13.24 
   2   1   1   58.98    1.59 
   2  -1   1   57.36    1.67 
  -2   1  -1   59.51    1.72 
   2   1   1   54.53    1.68 
  -2  -1  -1   57.66    1.74 
   3  -1   1   10.15    0.64 
  -3  -1  -1   11.43    0.65 
   3   1   1    9.55    0.65 
  -3   1  -1    9.68    0.60 
   3   1   1   10.83    0.44 
  -4  -1  -1   29.75    1.33 
   4   1   1   27.12    0.93 
  -4   1  -1   30.35    1.32 
   4   1   1   29.56    1.37 
   4  -1   1   27.83    1.28 
  -5  -1  -1    2.08    0.49 
   5   1   1    0.49    0.48 
   5  -1   1    1.28    0.45 
  -5   1  -1    1.69    0.46 
  -6   1  -1   96.59    3.28 
   6  -1   1   92.53    3.20 
  -6  -1  -1   95.38    3.30 
   6   1   1   97.48    3.26 
   7   1   1   14.41    1.25 
  -7  -1  -1   14.88    1.18 
   7  -1   1   16.62    1.24 
  -7   1  -1   14.47    1.18 
   8   1   1   24.45    1.62 
  -8  -1  -1   23.00    1.56 
   8  -1   1   23.58    1.58 
  -8   1  -1   24.44    1.56 
  -9   1  -1   40.39    2.17 
   9   1   1   37.65    2.18 
  -9  -1  -1   38.24    2.15 
   9  -1   1   41.04    2.23 
  10   1   1    0.28    0.63 
  10  -1   1   -0.30    0.66 
 -10  -1  -1    0.12    0.65 
 -10   1  -1    0.58    0.60 
  11   1   1   13.62    1.60 
  11  -1   1   11.39    1.49 
  11  -2  -1   -0.23    0.67 
 -11  -2   1    0.76    0.70 
  11   2  -1   -0.47    0.73 
 -11   2   1    0.19    0.68 
 -10  -2   1    6.41    1.16 
 -10   2   1    8.58    1.18 
  10  -2  -1    6.38    1.17 
  10   2  -1    7.74    1.22 
   9  -2  -1   12.40    1.32 
  -9   2   1   12.95    1.36 
   9   2  -1   13.47    1.44 
  -9  -2   1   12.60    1.35 
   8   2  -1    1.95    0.70 
  -8  -2   1    0.31    0.61 
   8  -2  -1    0.07    0.55 
  -8   2   1    1.80    0.61 
  -7  -2   1  249.97    7.27 
   7   2  -1  247.02    6.89 
   7  -2  -1  243.30    6.74 
  -7   2   1  229.21    7.13 
   6  -2  -1   -0.44    0.41 
  -6  -2   1   -0.92    0.42 
   6   2  -1    0.61    0.44 
  -6   2   1    0.23    0.24 
  -6   2   1    2.62    0.57 
  -5   2   1 1472.84   37.26 
   5   2  -1 1441.86   34.70 
  -5  -2   1 1499.18   37.32 
   5  -2  -1 1493.92   34.61 
  -5   2   1 1491.10   36.70 
  -4   2   1    1.85    0.38 
   4   2  -1    1.50    0.40 
   4  -2  -1    1.12    0.37 
  -4  -2   1    1.42    0.43 
  -3  -2   1 1164.00   28.96 
   3  -2  -1 1152.52   26.82 
   3   2  -1 1161.39   29.24 
  -3   2   1 1136.47   28.91 
   2   2  -1   11.75    0.44 
   2   2  -1   10.12    0.57 
  -2  -2   1   11.29    0.60 
   2  -2  -1   12.22    0.54 
   1  -2  -1   88.80    2.23 
   1   2  -1   88.15    2.34 
  -1   2   1   90.81    2.49 
   0   2   1   82.93    2.08 
   0   2   1   85.11    2.30 
   0   2  -1   81.36    2.14 
   1  -2   1   94.92    2.42 
   1   2   1   94.45    2.55 
   1   2   1   94.69    2.43 
   2   2   1  356.15    8.88 
   2   2   1  347.57    8.46 
   2  -2   1  354.30    8.42 
  -2  -2  -1  347.57    9.04 
   3  -2   1   30.49    1.16 
  -3  -2  -1   31.40    1.22 
   3   2   1   30.80    0.96 
   3   2   1   28.92    1.20 
  -3   2  -1   28.61    1.15 
  -4   2  -1  319.65    8.48 
   4  -2   1  317.72    7.97 
   4   2   1  324.15    8.08 
   4   2   1  317.06    8.05 
  -4  -2  -1  313.12    8.51 
   5   2   1   98.69    2.68 
   5  -2   1  104.73    3.15 
   5   2   1   98.87    3.20 
  -5   2  -1  100.87    3.25 
  -5  -2  -1   98.25    3.26 
  -6   2  -1   40.43    1.83 
  -6  -2  -1   41.33    1.89 
   6  -2   1   42.02    1.86 
   6   2   1   40.18    1.89 
  -7   2  -1  106.78    3.75 
   7   2   1  107.89    3.75 
  -7  -2  -1  109.43    3.83 
   7  -2   1  111.59    3.68 
   8   2   1    3.49    0.84 
   8  -2   1    1.49    0.70 
  -8  -2  -1    3.14    0.77 
  -8   2  -1    2.05    0.66 
   9  -2   1   18.14    1.54 
  -9   2  -1   16.32    1.45 
  -9  -2  -1   17.98    1.51 
   9   2   1   19.01    1.67 
 -10   2  -1    7.06    1.10 
  10   2   1    8.02    1.25 
 -10  -2  -1    7.66    1.20 
  10  -2   1    6.15    1.16 
  11  -2   1    0.75    0.81 
  11   2   1    1.76    0.92 
 -11   3   1    2.84    0.83 
 -11  -3   1    1.51    0.82 
  11   3  -1    1.38    0.84 
  11  -3  -1    0.38    0.80 
 -10  -3   1    2.57    0.90 
 -10   3   1    4.07    0.89 
  10  -3  -1    2.41    0.81 
  10   3  -1    1.74    0.85 
   9  -3  -1   35.37    2.05 
  -9  -3   1   32.92    2.10 
  -9   3   1   31.12    2.01 
   9   3  -1   33.42    2.14 
  -8  -3   1    0.70    0.56 
  -8   3   1    1.51    0.62 
   8   3  -1    0.74    0.63 
   8  -3  -1    0.91    0.52 
   7  -3  -1   70.23    2.70 
  -7  -3   1   72.00    2.95 
   7   3  -1   74.54    2.92 
  -7   3   1   69.01    2.88 
  -6   3   1    2.99    0.41 
  -6  -3   1    2.90    0.65 
   6   3  -1    2.20    0.61 
   6  -3  -1    2.63    0.55 
  -6   3   1    2.65    0.59 
  -5   3   1   23.37    1.11 
  -5  -3   1   24.18    1.37 
   5   3  -1   23.83    1.37 
  -5   3   1   23.16    1.34 
   5  -3  -1   23.85    1.25 
   4  -3  -1    1.33    0.35 
  -4  -3   1    1.52    0.39 
   4   3  -1    1.66    0.41 
  -4   3   1    1.56    0.38 
   4   3  -1    1.52    0.18 
  -3  -3   1 1282.59   32.96 
   3   3  -1 1318.97   30.68 
   3   3  -1 1337.41   32.83 
   3  -3  -1 1322.12   30.51 
   2   3  -1  162.16    4.24 
   2  -3  -1  158.93    4.00 
   2   3  -1  159.53    4.16 
  -1   3   1 3461.30   88.95 
  -1   3   1 3562.90   83.04 
  -1   3   1 3552.89   81.48 
   0   3   1  338.14    8.60 
   0   3  -1  332.53    8.00 
   0   3   1  334.27    7.94 
   1   3   1  904.21   22.23 
  -1   3  -1  896.01   20.72 
   1   3   1  891.91   20.74 
  -1   3  -1  876.62   20.32 
   2  -3   1  237.52    5.82 
   2   3   1  236.81    6.12 
   2   3   1  235.95    5.89 
   3   3   1   41.49    1.32 
   3  -3   1   41.78    1.45 
  -3  -3  -1   41.22    1.56 
   3   3   1   43.18    1.55 
  -4   3  -1    1.27    0.35 
  -4  -3  -1    1.00    0.35 
   4  -3   1    0.60    0.31 
   4   3   1    0.81    0.38 
   4   3   1    0.95    0.19 
  -5   3  -1   20.90    1.17 
   5   3   1   19.50    1.24 
  -5  -3  -1   19.08    1.21 
   5   3   1   19.34    0.77 
   5  -3   1   20.93    1.20 
  -6   3  -1   53.70    2.20 
   6   3   1   52.64    2.22 
  -6  -3  -1   58.14    2.32 
   6  -3   1   52.33    2.10 
   7  -3   1   90.00    3.10 
  -7  -3  -1   85.08    3.23 
  -7   3  -1   79.98    3.11 
   7   3   1   78.13    3.11 
   8  -3   1   20.71    1.49 
  -8  -3  -1   21.79    1.54 
  -8   3  -1   22.60    1.50 
   8   3   1   21.73    1.60 
  -9   3  -1  124.33    4.52 
   9   3   1  122.21    4.54 
   9  -3   1  128.13    4.43 
  -9  -3  -1  126.18    4.61 
 -10  -3  -1    0.28    0.63 
  10   3   1    1.31    0.75 
  10  -3   1    0.74    0.74 
 -10   3  -1    1.67    0.71 
  11   3   1   27.11    2.12 
  11  -3   1   29.17    2.13 
  11   4  -1    0.13    0.82 
 -11   4   1    1.88    0.79 
  11  -4  -1   -0.09    0.77 
 -11  -4   1    1.73    0.86 
 -10  -4   1   14.78    1.56 
  10   4  -1   12.77    1.52 
 -10   4   1   10.03    1.30 
  10  -4  -1   10.17    1.28 
  -9   4   1    1.88    0.79 
   9   4  -1    2.61    0.91 
   9  -4  -1    1.53    0.79 
  -9  -4   1    1.06    0.78 
   8  -4  -1   31.46    1.80 
   8   4  -1   29.50    1.87 
  -8  -4   1   34.84    1.99 
  -8   4   1   29.79    1.85 
   7  -4  -1  129.18    4.06 
  -7   4   1  129.72    4.40 
   7   4  -1  122.73    4.25 
  -7  -4   1  130.82    4.48 
   6   4  -1    5.33    0.81 
  -6   4   1    7.43    0.69 
  -6   4   1    7.53    0.84 
  -6  -4   1    6.43    0.85 
   6  -4  -1    7.10    0.77 
   5   4  -1  826.98   20.91 
  -5   4   1  842.74   21.29 
   5   4  -1  837.98   20.27 
  -5  -4   1  854.04   21.72 
   5  -4  -1  847.40   20.03 
  -5   4   1  833.04   21.63 
  -4  -4   1    4.71    0.61 
   4   4  -1    3.91    0.37 
   4  -4  -1    4.14    0.48 
   4   4  -1    3.52    0.56 
   3   4  -1  553.53   13.70 
   3  -4  -1  540.98   12.91 
   3   4  -1  534.49   13.12 
   2  -4  -1  248.32    6.04 
   2   4  -1  244.89    6.22 
   2   4  -1  248.99    6.49 
  -1   4   1   54.14    1.53 
   1   4  -1   54.46    1.70 
  -1   4   1   56.26    1.86 
   0   4   1    6.23    0.42 
   0   4   1    5.47    0.45 
   0   4  -1    6.42    0.46 
   1   4   1  146.67    3.74 
  -1   4  -1  145.30    3.69 
  -1   4  -1  144.14    3.62 
   1   4   1  146.51    4.03 
   2   4   1    1.43    0.32 
   2  -4   1    0.92    0.27 
   2   4   1    0.75    0.24 
   3  -4   1    9.46    0.66 
   3   4   1    9.07    0.76 
   3   4   1   11.54    0.63 
   4   4   1  221.95    5.92 
   4   4   1  224.67    5.79 
   4  -4   1  215.44    5.73 
   5   4   1   60.90    2.30 
   5   4   1   55.84    1.76 
  -5   4  -1   57.42    2.22 
  -5  -4  -1   58.15    2.27 
   5  -4   1   53.24    2.08 
  -6   4  -1   80.30    2.95 
  -6  -4  -1   83.52    3.05 
   6   4   1   74.93    2.90 
   6  -4   1   87.14    2.87 
   7   4   1   17.57    1.37 
   7  -4   1   14.97    1.25 
  -7  -4  -1   15.72    1.33 
  -7   4  -1   16.00    1.25 
   8  -4   1   10.08    1.09 
  -8   4  -1    7.71    1.01 
  -8  -4  -1   10.41    1.17 
   8   4   1    5.94    1.02 
  -9   4  -1    1.28    0.65 
   9  -4   1    0.17    0.69 
  -9  -4  -1    0.92    0.77 
   9   4   1    1.08    0.77 
  10  -4   1    4.99    1.02 
 -10   4  -1    3.41    0.89 
  10   4   1    2.41    0.92 
 -10  -4  -1    4.65    1.01 
  11   4   1    7.99    1.44 
  11  -4   1    9.37    1.39 
  11  -5  -1    0.72    0.84 
  11   5  -1   -0.19    0.78 
 -11   5   1    1.84    0.74 
  10   5  -1    1.58    0.83 
 -10   5   1    1.16    0.74 
  10  -5  -1    0.77    0.71 
   9   5  -1    3.80    0.98 
  -9  -5   1    3.73    1.03 
  -9   5   1    3.51    0.86 
   9  -5  -1    3.59    0.85 
   8  -5  -1   66.83    2.82 
  -8  -5   1   76.51    3.21 
   8   5  -1   75.37    3.22 
  -8   5   1   73.47    3.14 
  -7  -5   1   10.13    1.11 
   7  -5  -1   11.94    1.04 
  -7   5   1    9.79    1.08 
   7   5  -1   10.52    1.15 
   6   5  -1  114.40    3.83 
  -6   5   1  123.12    3.72 
  -6   5   1  115.60    3.93 
  -6  -5   1   99.36    3.89 
   6  -5  -1  121.54    3.63 
  -5   5   1   31.09    1.46 
   5   5  -1   31.52    1.62 
  -5   5   1   29.61    1.57 
   5  -5  -1   33.09    1.45 
   5   5  -1   33.07    1.14 
   4  -5  -1   63.11    2.07 
   4   5  -1   64.72    2.01 
   4   5  -1   62.93    2.31 
   3   5  -1  256.63    6.59 
   3   5  -1  252.34    6.70 
   3  -5  -1  250.62    6.31 
   2   5  -1    3.26    0.46 
   2   5  -1    3.35    0.41 
  -1   5   1  370.71    8.90 
  -1   5   1  373.22    9.80 
   1   5  -1  374.62    9.09 
   0   5   1  202.37    5.02 
   0   5   1  202.01    5.55 
   0   5  -1  198.94    5.09 
   1   5   1  107.23    2.96 
   1   5   1  108.82    3.23 
  -1   5  -1  109.22    2.92 
   2   5   1 1657.67   38.59 
   2   5   1 1668.21   41.25 
   3   5   1   10.59    0.82 
   3  -5   1   11.59    0.73 
   3   5   1   11.52    0.70 
   4  -5   1  629.89   15.22 
   4   5   1  630.50   15.44 
   4   5   1  641.14   16.01 
   5   5   1    3.28    0.65 
   5  -5   1    2.44    0.54 
   5   5   1    2.88    0.36 
  -5   5  -1    3.03    0.57 
   6  -5   1  112.04    3.49 
  -6   5  -1  107.17    3.67 
   6   5   1  103.96    3.63 
   7   5   1   53.56    2.44 
   7  -5   1   55.56    2.31 
  -7   5  -1   53.03    2.39 
  -8   5  -1    4.24    0.91 
   8  -5   1    5.85    0.94 
   8   5   1    4.17    1.00 
  -9   5  -1   22.03    1.60 
   9   5   1   19.93    1.71 
   9  -5   1   17.70    1.51 
  10  -5   1    0.80    0.68 
 -10   5  -1    0.91    0.59 
  10   5   1    0.67    0.82 
  11   5   1    1.11    0.87 
  11  -5   1    0.79    0.81 
  11   6  -1   -0.05    0.77 
  10  -6  -1   71.11    3.17 
  10   6  -1   74.70    3.58 
 -10   6   1   71.60    3.41 
   9  -6  -1    1.25    0.64 
  -9   6   1    2.14    0.71 
   9   6  -1    0.82    0.71 
   8   6  -1   87.63    3.65 
  -8   6   1   95.19    3.78 
   8  -6  -1   96.51    3.45 
   7   6  -1    0.86    0.64 
  -7   6   1    1.88    0.54 
   7  -6  -1    2.27    0.62 
  -7   6   1    1.58    0.61 
  -6   6   1    2.14    0.60 
  -6   6   1    2.61    0.70 
   6   6  -1    2.60    0.76 
   6  -6  -1    1.98    0.62 
   5   6  -1    0.88    0.28 
   5   6  -1    0.66    0.47 
   5  -6  -1    1.02    0.43 
  -5   6   1    0.49    0.34 
   4   6  -1   -0.39    0.31 
   4   6  -1    1.27    0.50 
  -4   6   1   -0.79    0.37 
   4  -6  -1    0.69    0.38 
   3   6  -1    8.00    0.63 
  -3   6   1    9.93    0.82 
   3  -6  -1    9.01    0.61 
   3   6  -1    7.71    0.75 
   2   6  -1  506.92   12.28 
  -2   6   1  512.06   13.23 
  -2   6   1  504.42   11.75 
  -2   6   1  498.49   11.98 
   2   6  -1  500.51   13.03 
   1   6  -1  121.34    3.64 
   1   6  -1  116.78    3.35 
  -1   6   1  119.09    3.68 
  -1   6   1  120.59    3.19 
   0   6   1  861.86   21.84 
   0   6   1  850.48   20.17 
   0   6  -1  871.03   20.26 
   1   6   1   26.13    1.24 
   1   6   1   28.22    1.15 
  -1   6  -1   27.69    1.10 
  -2   6  -1  979.19   22.28 
  -2   6  -1  958.80   22.70 
   2   6   1  969.28   24.44 
   2   6   1  976.53   22.88 
   3  -6   1   19.06    0.94 
   3   6   1   17.12    0.92 
   3   6   1   16.19    0.98 
   4  -6   1    5.48    0.61 
   4   6   1    3.20    0.62 
   4   6   1    2.00    0.39 
   5   6   1    6.51    0.57 
   5   6   1    7.10    0.86 
   5  -6   1    6.87    0.73 
   6  -6   1   98.15    3.26 
   6   6   1  101.25    3.57 
  -6   6  -1   95.99    3.48 
  -7   6  -1    8.95    0.88 
   7  -6   1    9.64    0.99 
   7   6   1    9.38    1.10 
  -7   6  -1    9.23    1.04 
   8  -6   1   36.61    1.97 
   8   6   1   34.63    2.15 
  -8   6  -1   34.57    2.03 
   9  -6   1   20.11    1.57 
   9   6   1   21.66    1.78 
  -9   6  -1   23.85    1.69 
 -10   6  -1    1.76    0.67 
  10  -6   1   -0.14    0.66 
  10   6   1   -0.10    0.75 
  11  -6   1   11.71    1.44 
  11   6   1   10.14    1.58 
  11   7  -1    1.96    0.98 
  10   7  -1    7.02    1.37 
  10  -7  -1    6.61    1.11 
 -10   7   1    9.62    1.41 
   9  -7  -1    0.95    0.61 
   9   7  -1    0.82    0.73 
  -9   7   1    1.54    0.70 
  -8   7   1  135.98    4.86 
   8  -7  -1  127.11    4.28 
   8   7  -1  129.64    4.74 
  -7   7   1   -0.27    0.50 
   7   7  -1   -0.24    0.57 
   7  -7  -1    0.65    0.53 
  -7   7   1    0.29    0.50 
  -6   7   1  141.56    4.69 
   6  -7  -1  140.60    4.16 
   6   7  -1  131.81    4.51 
  -6   7   1  136.73    4.49 
   5   7  -1    0.35    0.30 
   5   7  -1    0.16    0.48 
   5  -7  -1    0.57    0.40 
  -5   7   1    0.02    0.35 
   4   7  -1    8.48    0.90 
  -4   7   1    7.60    0.84 
   4  -7  -1    8.61    0.73 
   4   7  -1    9.08    0.78 
  -3   7   1    3.86    0.45 
  -3   7   1    0.80    0.43 
  -3   7   1    3.59    0.44 
   3   7  -1    1.13    0.45 
   3   7  -1    1.11    0.41 
  -2   7   1  123.96    3.41 
   2   7  -1  126.80    3.71 
   2   7  -1  125.21    3.87 
  -2   7   1  131.48    4.05 
   1   7  -1   23.23    1.19 
  -1   7   1   21.65    1.21 
  -1   7   1   22.25    0.97 
   1   7  -1   21.03    1.08 
   0   7   1   46.65    1.60 
   0   7  -1   45.97    1.68 
   0   7   1   48.88    1.93 
   1   7   1    4.93    0.60 
  -1   7  -1    5.06    0.51 
   1   7   1    4.55    0.51 
   2   7   1 1120.05   28.20 
   2   7   1 1126.55   26.35 
  -2   7  -1 1112.47   26.17 
   3   7   1    1.68    0.40 
   3   7   1    2.31    0.49 
  -3   7  -1    2.01    0.40 
  -3   7  -1    1.64    0.39 
   4  -7   1  905.03   21.88 
   4   7   1  920.87   22.18 
   4   7   1  942.15   23.34 
   5  -7   1   10.06    0.87 
   5   7   1   10.15    1.02 
   5   7   1   10.30    0.78 
   6   7   1  261.95    7.51 
   6  -7   1  267.43    7.19 
  -6   7  -1  267.61    7.81 
   7  -7   1   22.21    1.45 
   7   7   1   20.33    1.61 
  -7   7  -1   21.60    1.43 
  -7   7  -1   18.66    1.45 
   8   7   1   19.00    1.68 
   8  -7   1   19.12    1.45 
  -8   7  -1   21.75    1.61 
   9  -7   1    0.97    0.64 
  -9   7  -1    1.32    0.70 
   9   7   1    2.00    0.91 
  10  -7   1   -0.47    0.64 
  10   7   1    0.96    0.83 
 -10   7  -1    0.62    0.62 
  11   7   1    5.63    1.34 
  10   8  -1   19.22    1.93 
 -10   8   1   21.74    1.82 
   9  -8  -1    0.70    0.63 
  -9   8   1    1.28    0.64 
   9   8  -1    0.07    0.77 
  -8   8   1   17.50    1.54 
   8   8  -1   16.91    1.60 
   8  -8  -1   14.28    1.28 
  -7   8   1    4.61    0.94 
   7   8  -1    4.75    1.02 
  -7   8   1    5.38    0.97 
   7  -8  -1    5.83    0.88 
   6   8  -1    8.43    1.11 
   6  -8  -1    8.66    0.90 
  -6   8   1    9.13    1.01 
   5  -8  -1    2.81    0.61 
   5   8  -1    1.47    0.67 
   5   8  -1    1.07    0.47 
  -5   8   1   -0.40    0.55 
   4   8  -1   15.54    1.23 
  -4   8   1   15.16    1.21 
   4   8  -1   16.14    1.05 
  -3   8   1    0.34    0.37 
   3   8  -1   -0.15    0.39 
  -3   8   1    0.85    0.38 
  -3   8   1    0.21    0.47 
   3   8  -1    1.34    0.55 
  -2   8   1   70.27    2.21 
  -2   8   1   71.92    2.73 
   2   8  -1   73.72    2.52 
   2   8  -1   70.94    2.60 
   1   8  -1   11.97    0.87 
  -1   8   1   11.16    0.74 
   1   8  -1   11.60    0.93 
  -1   8   1   11.76    0.94 
   0   8   1  205.06    5.97 
   0   8   1  198.67    5.30 
   0   8  -1  204.90    5.38 
  -1   8  -1   -0.61    0.26 
   1   8   1    0.10    0.30 
   1   8   1    0.26    0.36 
  -2   8  -1  335.79    8.51 
   2   8   1  342.54    9.32 
   2   8   1  349.90    8.72 
  -3   8  -1   21.76    1.09 
   3   8   1   21.66    1.28 
   3   8   1   23.85    1.35 
  -3   8  -1   22.36    1.12 
   4   8   1   15.82    1.18 
   4   8   1   18.80    1.11 
   5  -8   1    3.88    0.65 
   5   8   1    2.80    0.59 
   5   8   1    2.92    0.73 
  -6   8  -1   35.79    1.92 
   6   8   1   36.82    2.04 
   6  -8   1   36.15    1.75 
  -7   8  -1    9.78    1.17 
   7  -8   1   10.05    1.07 
   7   8   1    7.33    1.19 
  -7   8  -1    6.91    0.99 
  -8   8  -1   14.42    1.43 
   8  -8   1   16.32    1.34 
   8   8   1   15.44    1.57 
   9   8   1   11.20    1.49 
   9  -8   1   11.73    1.28 
  -9   8  -1   12.59    1.42 
  10   8   1    0.79    0.83 
  10   9  -1    0.43    0.79 
 -10   9   1    1.93    0.76 
  -9   9   1    1.66    0.79 
   9   9  -1    0.09    0.76 
   8  -9  -1    9.43    1.09 
  -8   9   1   13.93    1.46 
   8   9  -1   10.08    1.35 
   7  -9  -1    0.97    0.63 
   7   9  -1    0.43    0.72 
  -7   9   1   -0.10    0.61 
  -7   9   1   -0.58    0.62 
  -6   9   1    6.36    0.90 
   6   9  -1    7.21    1.05 
   6  -9  -1    5.84    0.76 
   5   9  -1    0.72    0.65 
  -5   9   1   -0.16    0.48 
   5   9  -1    0.20    0.43 
   5  -9  -1    1.18    0.52 
   4   9  -1    0.80    0.52 
   4   9  -1    0.61    0.41 
  -4   9   1    1.42    0.41 
  -4   9   1    0.63    0.37 
  -4   9   1    0.97    0.47 
  -3   9   1    7.60    1.00 
   3   9  -1    8.28    0.98 
   3   9  -1    9.98    0.99 
  -3   9   1   10.71    0.84 
  -2   9   1   17.21    0.93 
   2   9  -1   14.40    1.12 
   2   9  -1   15.29    1.10 
  -2   9   1   13.55    1.15 
  -1   9   1   35.32    1.43 
  -1   9   1   32.78    1.78 
   1   9  -1   34.03    1.58 
   1   9  -1   30.19    1.74 
   0   9  -1   19.67    1.14 
   0   9  -1   21.02    1.31 
   0   9   1   20.28    1.31 
   0   9   1   20.69    1.07 
   1   9   1    2.94    0.55 
  -1   9  -1    1.91    0.48 
   1   9   1   -0.02    0.56 
   2   9   1    1.66    0.54 
  -2   9  -1    2.06    0.45 
   2   9   1    2.56    0.54 
   3   9   1    1.10    0.54 
  -3   9  -1    1.50    0.46 
   3   9   1    2.92    0.65 
  -4   9  -1    7.60    0.73 
   4   9   1    4.90    0.78 
  -4   9  -1    6.48    0.68 
   4   9   1    6.94    0.76 
   5   9   1    6.31    0.76 
   5  -9   1    6.07    0.77 
   5   9   1    4.49    0.87 
   6  -9   1    2.08    0.63 
  -6   9  -1    0.52    0.50 
   6   9   1    0.47    0.60 
  -7   9  -1   22.15    1.62 
   7  -9   1   22.21    1.56 
   7   9   1   20.99    1.79 
  -7   9  -1   19.54    1.65 
  -8   9  -1    1.11    0.68 
   8   9   1    2.22    0.89 
   8  -9   1    2.10    0.72 
   9  -9   1    7.07    1.12 
  -9   9  -1   10.16    1.35 
   9   9   1    6.09    1.33 
  10   9   1    0.46    0.83 
 -10  10   1    7.35    1.31 
  10  10  -1    7.43    1.40 
  -9  10   1    2.43    0.95 
   9  10  -1    2.56    1.05 
  -8  10   1   11.06    1.38 
   8  10  -1   10.88    1.50 
  -7  10   1   20.37    1.74 
   7  10  -1   18.39    1.74 
  -7  10   1   15.47    1.51 
   6  10  -1    6.75    1.12 
  -6  10   1    5.54    0.95 
  -5  10   1   45.90    2.38 
  -5  10   1   45.16    1.85 
   5  10  -1   47.18    2.33 
  -5  10   1   42.53    1.86 
   5  10  -1   47.22    2.08 
   4  10  -1   20.70    1.34 
  -4  10   1   25.76    1.62 
  -4  10   1   19.32    1.14 
  -4  10   1   21.73    1.18 
   4  10  -1   22.01    1.44 
   3  10  -1   56.75    2.41 
  -3  10   1   62.37    2.71 
  -3  10   1   56.54    2.06 
   3  10  -1   57.47    2.40 
   2  10  -1   84.00    3.06 
  -2  10   1   71.30    3.04 
  -2  10   1   79.35    2.55 
   2  10  -1   86.10    2.89 
  -1  10   1   14.10    1.14 
   1  10  -1   12.70    0.99 
  -1  10   1   13.06    0.89 
   1  10  -1   13.35    1.10 
   0  10   1  185.28    5.18 
   0  10  -1  182.11    5.24 
   0  10  -1  211.58    6.04 
   0  10   1  187.62    5.91 
   1  10   1    1.71    0.56 
   1  10   1    2.26    0.52 
  -1  10  -1    1.37    0.52 
   2  10   1  102.68    3.54 
   2  10   1  104.17    3.25 
  -2  10  -1  100.71    3.08 
  -2  10  -1   86.25    3.51 
   3  10   1    1.78    0.67 
   3  10   1    3.32    0.76 
  -3  10  -1    2.78    0.74 
  -3  10  -1    3.35    0.58 
  -4  10  -1   17.72    1.41 
  -4  10  -1   18.91    1.14 
   4  10   1   19.30    1.35 
  -4  10  -1   18.27    1.12 
   4  10   1   18.36    1.29 
  -5  10  -1   17.29    1.50 
  -5  10  -1   15.34    1.14 
   5  10   1   15.57    1.30 
  -5  10  -1   18.47    1.16 
   5  10   1   17.53    1.52 
  -6  10  -1    0.04    0.55 
   6  10   1    0.57    0.61 
  -7  10  -1    6.81    1.11 
   7  10   1    5.19    1.09 
   7 -10   1    6.34    0.94 
  -7  10  -1    6.08    1.07 
   8  10   1    0.59    0.72 
  -8  10  -1    1.83    0.76 
   8 -10   1    0.06    0.54 
   9  10   1    1.14    0.93 
  -9  10  -1    3.18    0.94 
  10  10   1   -0.33    0.71 
  10  11  -1    3.09    1.11 
 -10  11   1    3.18    1.04 
  -9  11   1    2.63    0.90 
   9  11  -1    1.20    0.89 
  -8  11   1   17.57    1.74 
   8  11  -1   16.06    1.73 
   7  11  -1    1.49    0.85 
  -7  11   1    0.50    0.70 
  -6  11   1   37.89    2.25 
   6  11  -1   37.99    2.30 
  -5  11   1   -0.26    0.38 
   5  11  -1    0.03    0.45 
  -5  11   1    0.33    0.44 
   5  11  -1    0.79    0.63 
  -5  11   1   -0.16    0.53 
   4  11  -1    7.53    0.99 
  -4  11   1    7.00    1.07 
   4  11  -1    5.99    0.89 
  -4  11   1    6.35    0.74 
   3  11  -1   22.62    1.51 
  -3  11   1   24.10    1.26 
  -3  11   1   20.30    1.56 
   3  11  -1   22.82    1.52 
  -2  11   1    0.49    0.42 
   2  11  -1   -0.09    0.44 
  -2  11   1   -1.15    0.44 
   2  11  -1    0.29    0.49 
  -1  11   1   37.85    2.07 
   1  11  -1   39.16    1.99 
  -1  11   1   37.43    1.61 
   1  11  -1   38.21    1.78 
   0  11  -1   23.13    1.30 
   0  11   1   22.81    1.25 
   0  11  -1   22.83    1.50 
   0  11   1   22.55    1.50 
   1  11   1   20.61    1.42 
   1  11   1   21.49    1.29 
  -1  11  -1   19.68    1.19 
  -1  11  -1   20.84    1.47 
   2  11   1  184.61    5.28 
  -2  11  -1  180.73    5.10 
  -2  11  -1  182.00    5.88 
  -3  11  -1   13.77    1.30 
   3  11   1   11.92    1.13 
   3  11   1   12.83    1.19 
  -3  11  -1   14.39    1.05 
   4  11   1  252.54    7.31 
   4  11   1  241.96    7.01 
  -4  11  -1  237.17    6.57 
  -4  11  -1  247.13    7.57 
   5  11   1    0.08    0.47 
  -5  11  -1    0.86    0.51 
   5  11   1    0.10    0.59 
  -5  11  -1   -0.17    0.43 
  -5  11  -1    1.20    0.65 
   6  11   1  104.29    3.99 
  -6  11  -1  101.17    4.03 
  -6  11  -1  102.07    3.44 
  -6  11  -1  102.15    3.35 
   7  11   1    0.67    0.78 
  -7  11  -1    1.35    0.78 
   8  11   1    9.68    1.46 
  -8  11  -1    8.88    1.33 
  -9  11  -1    5.34    1.15 
   9  11   1    5.20    1.33 
  -9  12   1    0.91    0.78 
   9  12  -1   -0.52    0.80 
  -8  12   1   16.63    1.82 
   8  12  -1   14.00    1.73 
   7  12  -1    3.93    1.08 
  -7  12   1    3.04    0.93 
   6  12  -1    0.54    0.66 
  -6  12   1   -0.18    0.62 
   5  12  -1    0.18    0.54 
   5  12  -1    0.07    0.47 
  -5  12   1    0.29    0.59 
   4  12  -1    0.76    0.67 
  -4  12   1    0.77    0.50 
  -4  12   1    0.64    0.67 
   4  12  -1    0.28    0.57 
   3  12  -1    6.89    0.95 
   3  12  -1    7.43    0.97 
  -3  12   1    7.17    0.78 
  -3  12   1    7.41    1.06 
   2  12  -1   21.87    1.47 
  -2  12   1   22.88    1.28 
   2  12  -1   20.17    1.57 
  -2  12   1   21.51    1.66 
   1  12  -1    8.11    0.92 
  -1  12   1    9.47    0.87 
   1  12  -1    8.32    1.05 
  -1  12   1    8.34    1.10 
   0  12  -1  150.99    4.55 
   0  12   1  152.95    5.25 
   0  12   1  153.48    4.49 
   0  12  -1  155.87    5.25 
  -1  12  -1    3.37    0.64 
  -1  12  -1    3.25    0.81 
   1  12   1    2.57    0.78 
   1  12   1    3.79    0.72 
   2  12   1  136.57    4.38 
   2  12   1  148.36    4.90 
  -2  12  -1  144.44    5.01 
  -2  12  -1  138.19    4.21 
  -3  12  -1    2.31    0.62 
   3  12   1    2.56    0.70 
  -3  12  -1    2.36    0.72 
   3  12   1    3.30    0.75 
   4  12   1    6.83    0.94 
  -4  12  -1    7.66    1.12 
   4  12   1    6.93    1.00 
  -4  12  -1    6.70    0.81 
   5  12   1   -0.69    0.55 
   5  12   1   -0.01    0.48 
  -5  12  -1    0.09    0.53 
  -5  12  -1   -0.46    0.42 
   6  12   1   23.58    1.86 
  -6  12  -1   24.78    1.88 
   7  12   1   10.90    1.48 
  -7  12  -1    8.88    1.31 
  -8  12  -1   14.31    1.68 
   8  12   1   12.39    1.64 
  -9  12  -1   14.32    1.73 
   9  12   1   11.70    1.69 
  -9  13   1    1.04    0.84 
   9  13  -1    1.50    0.90 
   8  13  -1   17.31    1.88 
  -8  13   1   14.67    1.80 
  -7  13   1    0.14    0.65 
   7  13  -1   -0.66    0.71 
   6  13  -1   20.11    1.87 
  -6  13   1   22.77    1.92 
   5  13  -1    4.15    1.02 
   5  13  -1    4.24    0.87 
  -5  13   1    4.50    1.07 
  -4  13   1   -0.14    0.68 
   4  13  -1    1.09    0.69 
   4  13  -1    0.74    0.59 
  -3  13   1   11.95    1.02 
   3  13  -1   12.50    1.21 
  -3  13   1   17.19    1.54 
   3  13  -1   12.09    1.21 
  -2  13   1   16.67    1.57 
   2  13  -1   18.05    1.44 
  -2  13   1   17.56    1.20 
   2  13  -1   19.84    1.38 
  -1  13   1   34.00    2.05 
   1  13  -1   34.17    1.76 
  -1  13   1   32.72    1.61 
   1  13  -1   36.23    2.07 
   0  13  -1   -0.48    0.43 
   0  13  -1    0.46    0.49 
   0  13   1    0.95    0.50 
   0  13   1   -0.22    0.41 
   1  13   1    8.21    1.08 
  -1  13  -1   10.68    1.26 
   1  13   1   10.19    0.99 
  -1  13  -1   10.39    0.98 
   2  13   1   64.75    2.67 
  -2  13  -1   74.25    3.23 
  -2  13  -1   66.95    2.54 
   2  13   1   71.96    3.06 
   3  13   1    6.06    0.92 
  -3  13  -1    4.82    0.98 
  -3  13  -1    4.61    0.73 
   3  13   1    4.59    0.88 
   4  13   1   92.21    3.54 
  -4  13  -1   90.59    3.15 
   4  13   1   93.00    3.66 
  -4  13  -1   85.78    3.78 
   5  13   1   27.24    1.79 
   5  13   1   25.80    1.86 
  -5  13  -1   26.82    2.02 
  -6  13  -1   30.21    2.14 
   6  13   1   27.87    2.10 
   7  13   1   24.01    2.03 
  -7  13  -1   25.43    2.01 
   8  13   1   -0.31    0.78 
  -8  13  -1    0.77    0.69 
   9  13   1    9.67    1.54 
  -9  13  -1   11.53    1.66 
   8  14  -1    0.30    0.85 
  -8  14   1   -0.22    0.71 
   7  14  -1   21.25    1.93 
  -7  14   1   15.19    1.71 
   6  14  -1    5.55    1.19 
  -6  14   1    6.64    1.23 
   5  14  -1  109.63    4.27 
  -5  14   1  114.99    4.56 
   5  14  -1  105.11    4.14 
  -4  14   1   10.28    1.37 
   4  14  -1    8.18    1.17 
   4  14  -1    7.61    1.13 
   3  14  -1   49.18    2.57 
  -3  14   1   54.24    2.83 
   3  14  -1   53.38    2.52 
  -2  14   1    0.34    0.76 
   2  14  -1   -0.38    0.60 
   2  14  -1    0.22    0.62 
  -1  14   1    7.02    0.85 
  -1  14   1    8.97    1.24 
   1  14  -1    5.65    1.05 
   1  14  -1    7.47    0.95 
   0  14  -1   25.63    1.59 
   0  14  -1   28.10    1.91 
   0  14   1   24.51    1.49 
   0  14   1   25.62    1.87 
   1  14   1    1.14    0.67 
  -1  14  -1   -0.33    0.57 
  -1  14  -1    1.20    0.63 
   1  14   1    0.80    0.59 
  -2  14  -1    2.76    0.90 
  -2  14  -1    2.90    0.72 
   2  14   1    4.15    0.98 
   2  14   1    3.71    0.84 
   3  14   1    2.17    0.76 
  -3  14  -1    1.87    0.87 
  -3  14  -1    1.10    0.64 
   3  14   1    1.42    0.76 
   4  14   1    9.12    1.17 
   4  14   1    6.67    1.08 
  -4  14  -1   10.29    1.35 
   5  14   1   18.15    1.60 
   5  14   1   21.81    1.77 
  -5  14  -1   20.76    1.77 
   6  14   1   16.49    1.69 
  -6  14  -1   22.61    1.89 
   7  14   1    4.65    1.18 
  -7  14  -1    4.31    1.11 
  -8  14  -1    5.51    1.23 
   8  14   1    4.57    1.19 
   8  15  -1    0.59    0.91 
   7  15  -1    1.25    0.98 
  -7  15   1    2.59    1.03 
  -6  15   1    1.27    0.85 
   6  15  -1    0.04    0.78 
   5  15  -1   15.84    1.61 
  -5  15   1   15.03    1.67 
   4  15  -1   -0.35    0.57 
  -4  15   1   -0.12    0.62 
   4  15  -1   -0.84    0.58 
  -3  15   1  120.16    4.75 
   3  15  -1  117.59    4.53 
   3  15  -1  117.46    4.25 
   2  15  -1    0.61    0.74 
  -2  15   1    0.90    0.71 
   2  15  -1    0.44    0.64 
   1  15  -1  237.52    6.87 
  -1  15   1  235.74    7.76 
   1  15  -1  243.26    7.71 
   0  15  -1    4.11    1.01 
   0  15   1    3.57    0.96 
   0  15   1    4.33    0.80 
   0  15  -1    2.64    0.77 
  -1  15  -1   73.43    3.45 
   1  15   1   70.87    2.86 
   1  15   1   74.17    3.44 
  -1  15  -1   75.93    2.84 
   2  15   1   15.34    1.51 
   2  15   1   13.53    1.26 
  -2  15  -1   13.68    1.52 
   3  15   1    2.26    0.90 
   3  15   1    3.85    0.89 
  -3  15  -1    3.74    0.95 
  -4  15  -1    2.15    0.85 
   4  15   1    1.84    0.83 
   4  15   1    2.35    0.85 
   5  15   1    3.25    0.99 
  -5  15  -1    4.02    1.09 
  -6  15  -1    2.62    0.98 
   6  15   1    2.04    0.94 
  -7  15  -1   20.68    1.93 
   7  15   1   19.01    1.97 
  -7  16   1   24.15    2.15 
   7  16  -1   16.06    1.92 
  -6  16   1   -1.04    0.73 
   6  16  -1   -1.63    0.72 
   5  16  -1  104.37    4.31 
  -5  16   1  108.34    4.67 
   4  16  -1   -0.01    0.59 
   4  16  -1    1.03    0.74 
  -4  16   1    0.34    0.75 
   3  16  -1   49.89    2.54 
  -3  16   1   47.93    2.87 
   3  16  -1   50.25    2.68 
  -2  16   1   -1.17    0.46 
   2  16  -1    1.01    0.68 
   2  16  -1    0.38    0.58 
   1  16  -1    2.19    0.69 
   1  16  -1    0.75    0.64 
  -1  16   1    1.62    0.80 
   0  16  -1    0.53    0.71 
   0  16  -1   -0.17    0.52 
   0  16   1    0.34    0.68 
  -1  16  -1   15.59    1.62 
   1  16   1   16.93    1.36 
   1  16   1   16.51    1.64 
   2  16   1    8.44    1.26 
   2  16   1    9.19    1.13 
  -2  16  -1    6.88    1.26 
   3  16   1    2.81    0.88 
  -3  16  -1    1.52    0.84 
   3  16   1    2.29    0.85 
   4  16   1   18.95    1.65 
   4  16   1   19.65    1.73 
  -4  16  -1   19.56    1.92 
  -5  16  -1   12.47    1.64 
   5  16   1   12.15    1.55 
   6  16   1    7.56    1.39 
  -6  16  -1    8.53    1.46 
   7  16   1   10.55    1.64 
  -7  16  -1   13.71    1.74 
  -6  17   1   -0.97    0.81 
   6  17  -1    0.14    0.85 
  -5  17   1    2.09    0.96 
   5  17  -1   -0.55    0.73 
  -4  17   1    2.14    1.02 
   4  17  -1    0.88    0.76 
   4  17  -1    2.68    0.93 
  -3  17   1   27.65    2.21 
   3  17  -1   25.18    1.97 
   3  17  -1   27.39    1.91 
   2  17  -1    2.02    0.82 
   2  17  -1    2.24    0.82 
  -2  17   1    2.06    0.96 
   1  17  -1   46.65    2.76 
   1  17  -1   46.79    2.32 
  -1  17   1   50.62    2.91 
   0  17   1    7.63    1.30 
   0  17  -1    7.52    1.28 
   1  17   1    3.84    1.05 
  -1  17  -1    3.85    1.08 
   2  17   1    9.97    1.38 
  -2  17  -1    8.86    1.43 
  -3  17  -1    2.15    0.99 
   3  17   1    4.40    0.97 
   3  17   1    3.86    1.01 
   4  17   1    3.09    1.02 
  -4  17  -1    1.18    0.89 
   4  17   1    1.61    0.86 
  -5  17  -1    1.30    0.90 
   5  17   1    1.87    0.93 
  -6  17  -1    0.29    0.85 
   6  17   1    0.92    0.85 
   5  18  -1    4.33    1.16 
  -5  18   1    4.10    1.24 
   4  18  -1    2.55    0.94 
  -4  18   1    2.01    1.04 
   4  18  -1    1.49    0.85 
   3  18  -1   -0.99    0.57 
   3  18  -1    0.00    0.68 
  -3  18   1    0.07    0.81 
  -2  18   1    4.46    1.20 
   2  18  -1    4.61    1.15 
   1  18  -1    5.05    1.16 
  -1  18   1    5.54    1.20 
   0  18   1    8.65    1.41 
   0  18  -1    6.10    1.27 
   1  18   1   10.46    1.48 
  -1  18  -1   11.35    1.51 
   2  18   1    1.31    0.88 
  -2  18  -1    1.13    0.82 
  -3  18  -1    1.07    0.79 
   3  18   1    0.44    0.77 
  -4  18  -1    0.91    0.92 
   4  18   1   -0.46    0.64 
   4  18   1   -0.60    0.67 
   5  18   1   -0.01    0.78 
  -5  18  -1   -1.36    0.69 
   4  19  -1    2.72    0.98 
  -4  19   1    0.10    0.88 
  -3  19   1    0.35    0.81 
   3  19  -1    0.75    0.80 
   2  19  -1    0.20    0.73 
  -2  19   1   -0.36    0.77 
   1  19  -1    0.76    0.80 
  -1  19   1   -0.77    0.72 
   0  19   1    0.85    0.78 
   0  19  -1    1.89    0.93 
   1  19   1    3.13    1.00 
  -1  19  -1    0.88    0.92 
   2  19   1    6.48    1.29 
  -2  19  -1    6.80    1.41 
  -3  19  -1    3.00    1.13 
   3  19   1    3.40    1.04 
   4  19   1   12.03    1.64 
  -4  19  -1    9.78    1.60 
   2  20  -1    2.55    0.96 
  -2  20   1    2.22    1.01 
   1  20  -1    2.41    0.99 
  -1  20   1    1.38    0.92 
   0  20   1    5.91    1.36 
   0  20  -1    5.34    1.28 
  -1  20  -1    0.18    0.78 
   1  20   1   -0.74    0.63 
  -2  20  -1    5.97    1.39 
   2  20   1    8.96    1.50 
 -11   0   2   -0.15    0.66 
  11   0  -2    0.50    0.68 
 -10   0   2   98.28    4.02 
  10   0  -2   93.20    3.83 
  -9   0   2    1.56    0.74 
   9   0  -2    1.37    0.72 
  -8   0   2   50.36    2.46 
   8   0  -2   49.98    2.37 
   7   0  -2    7.94    0.94 
  -7   0   2   11.79    1.06 
   6   0  -2   75.14    2.69 
  -6   0   2   75.18    2.85 
   5   0  -2   73.75    2.49 
  -5   0   2   75.81    2.66 
  -4   0   2 1038.59   26.29 
   4   0  -2 1042.05   24.43 
  -3   0   2  803.55   20.33 
   3   0  -2  804.76   18.86 
  -2   0   2 1417.46   35.49 
  -2   0   2 1450.84   38.01 
   2   0  -2 1405.55   32.92 
   1   0  -2  179.57    4.71 
  -1   0   2  178.07    4.73 
  -1   0   2  179.39    4.69 
   1   0  -2  182.81    4.34 
   0   0  -2   -1.28    0.01 
  -1   0  -2  198.13    5.20 
   1   0   2  199.51    4.82 
   1   0   2  202.85    5.14 
  -2   0  -2  444.57   11.08 
   2   0   2  436.66   10.40 
   2   0   2  431.43   11.00 
   3   0   2   38.50    1.38 
  -3   0  -2   37.91    1.32 
   3   0   2   37.23    1.17 
   4   0   2   -0.02    0.34 
  -4   0  -2    0.85    0.37 
   5   0   2   49.49    1.97 
  -5   0  -2   53.68    1.98 
   6   0   2  317.60    8.33 
  -6   0  -2  310.82    8.67 
   7   0   2    4.03    0.76 
  -7   0  -2    4.10    0.73 
  -8   0  -2  155.02    4.98 
   8   0   2  145.20    4.85 
   9   0   2   21.02    1.66 
  -9   0  -2   24.15    1.65 
  10   0   2   47.65    2.63 
 -10   0  -2   54.22    2.67 
  11   0   2   21.68    1.84 
  11  -1  -2    2.96    0.95 
  11   1  -2    1.92    0.85 
 -11   1   2    1.71    0.85 
 -11  -1   2    2.83    0.93 
  10  -1  -2   21.58    1.77 
 -10  -1   2   24.16    1.87 
  10   1  -2   25.33    1.92 
 -10   1   2   24.86    1.83 
   9   1  -2    1.68    0.75 
   9  -1  -2    3.32    0.84 
  -9  -1   2    3.20    0.86 
  -9   1   2    1.85    0.81 
  -8  -1   2  216.23    6.80 
   8   1  -2  220.84    6.46 
  -8   1   2  218.05    6.78 
   8  -1  -2  217.68    6.39 
   7  -1  -2    4.92    0.78 
  -7  -1   2    4.93    0.81 
  -7   1   2    4.54    0.78 
   7   1  -2    3.95    0.78 
   6   1  -2  971.96   23.21 
   6  -1  -2  976.59   23.16 
  -6   1   2  983.81   24.08 
  -6   1   2  947.39   24.86 
  -6  -1   2  957.78   24.89 
   5   1  -2   33.52    1.51 
  -5  -1   2   33.03    1.53 
   5  -1  -2   30.35    1.42 
  -5   1   2   33.84    1.07 
  -5   1   2   32.18    1.55 
  -4   1   2  587.03   14.54 
  -4  -1   2  583.28   15.02 
   4   1  -2  582.75   13.98 
  -4   1   2  566.63   14.98 
   4  -1  -2  581.92   13.91 
   3  -1  -2  107.09    2.94 
  -3  -1   2  109.84    3.23 
  -3   1   2  110.88    3.22 
  -3   1   2  109.83    2.91 
   3   1  -2  106.11    3.00 
  -2   1   2   17.76    0.77 
  -2  -1   2   18.50    0.80 
   2  -1  -2   17.95    0.69 
   2   1  -2   18.10    0.74 
  -2   1   2   18.97    0.65 
  -1   1   2    8.83    0.37 
  -1  -1   2    8.15    0.41 
   1   1  -2   10.01    0.42 
   1  -1  -2    9.51    0.33 
   0  -1   2    0.14    0.06 
   0   1  -2    0.16    0.07 
   0  -1  -2    0.06    0.03 
   0   1   2    0.28    0.04 
   0   1   2    0.24    0.07 
   1  -1   2  171.03    4.54 
   1   1   2  177.19    4.27 
   1   1   2  173.40    4.53 
   1  -1   2  176.94    4.29 
   2  -1   2  293.75    7.21 
  -2  -1  -2  297.28    7.67 
   2   1   2  308.99    7.59 
   2   1   2  291.70    7.23 
  -2   1  -2  300.78    7.65 
   3  -1   2  517.23   12.48 
   3   1   2  518.45   12.51 
  -3   1  -2  515.70   13.28 
  -3  -1  -2  527.89   13.32 
   3   1   2  532.02   13.11 
  -4   1  -2 1519.91   37.71 
   4   1   2 1488.65   35.19 
   4  -1   2 1490.68   35.16 
   4   1   2 1507.44   37.35 
  -4  -1  -2 1537.64   37.74 
  -5  -1  -2   96.64    3.09 
  -5   1  -2   95.40    3.06 
   5  -1   2   94.27    3.02 
   5   1   2   92.54    3.04 
  -6   1  -2  435.99   11.90 
   6  -1   2  437.78   11.30 
   6   1   2  461.69   11.40 
  -6  -1  -2  449.71   11.97 
   7   1   2    2.13    0.75 
  -7   1  -2    2.61    0.66 
  -7  -1  -2    2.90    0.66 
   7  -1   2    2.77    0.72 
  -8   1  -2    8.91    1.03 
   8   1   2    8.49    1.08 
  -8  -1  -2   11.46    1.15 
   8  -1   2    8.59    1.11 
   9   1   2    5.53    1.07 
  -9   1  -2    6.96    1.02 
   9  -1   2    8.20    1.14 
  -9  -1  -2    6.03    1.01 
  10  -1   2    0.39    0.79 
 -10  -1  -2    1.35    0.77 
 -10   1  -2    2.63    0.82 
  10   1   2    1.72    0.77 
  11  -1   2    1.22    0.76 
  11   1   2    1.19    0.90 
  11  -2  -2    1.04    0.86 
 -11   2   2    2.25    0.92 
 -11  -2   2    0.66    0.74 
  11   2  -2    0.70    0.82 
  10  -2  -2   30.38    2.02 
  10   2  -2   29.20    2.08 
 -10   2   2   31.33    2.00 
 -10  -2   2   34.54    2.20 
  -9  -2   2    7.23    1.13 
   9  -2  -2    5.63    1.02 
  -9   2   2    5.48    1.02 
   9   2  -2    3.76    1.01 
   8   2  -2   24.81    1.66 
  -8   2   2   23.90    1.59 
  -8  -2   2   23.56    1.65 
   8  -2  -2   21.11    1.47 
   7   2  -2    0.13    0.50 
   7  -2  -2    0.67    0.58 
  -7   2   2    0.10    0.46 
  -7  -2   2    0.97    0.52 
  -6   2   2    5.13    0.44 
   6  -2  -2    4.90    0.71 
   6   2  -2    5.28    0.77 
  -6  -2   2    4.52    0.78 
  -6   2   2    5.32    0.75 
  -5   2   2   25.50    1.35 
  -5  -2   2   23.24    1.32 
   5  -2  -2   22.45    1.24 
   5   2  -2   23.66    1.34 
  -5   2   2   20.20    0.98 
  -4   2   2  271.91    6.85 
   4  -2  -2  260.35    6.62 
  -4   2   2  253.31    7.17 
  -4  -2   2  262.87    7.23 
   4   2  -2  265.05    6.76 
   3   2  -2    6.27    0.53 
  -3   2   2    5.28    0.44 
  -3  -2   2    4.63    0.51 
   3  -2  -2    5.06    0.44 
  -3   2   2    6.03    0.57 
  -2  -2   2   20.50    0.89 
  -2   2   2   22.28    0.83 
   2   2  -2   22.26    0.89 
   2  -2  -2   21.77    0.75 
  -1   2   2  688.87   17.46 
   1  -2  -2  717.59   16.47 
   1   2  -2  688.31   16.33 
   0   2  -2   55.79    1.55 
   0   2   2   55.96    1.64 
   0   2   2   55.82    1.43 
   1   2   2  926.99   22.63 
   1  -2   2  891.46   21.12 
   1   2   2  905.91   21.10 
   2  -2   2  103.32    2.77 
   2   2   2  103.25    2.79 
   2   2   2  103.83    2.80 
  -3  -2  -2  139.75    3.89 
   3   2   2  137.74    3.65 
  -3   2  -2  138.40    3.83 
   3  -2   2  138.23    3.69 
   3   2   2  132.98    3.72 
  -4  -2  -2  111.64    3.30 
  -4   2  -2  107.11    3.22 
   4  -2   2  101.74    3.10 
   4   2   2  105.21    3.20 
   4   2   2  109.02    2.92 
  -5   2  -2   -0.01    0.36 
   5  -2   2    0.14    0.43 
  -5  -2  -2   -0.08    0.37 
   5   2   2    0.63    0.23 
   5   2   2    0.04    0.47 
   6  -2   2  179.22    5.23 
  -6   2  -2  189.84    5.46 
   6   2   2  166.09    5.25 
  -6  -2  -2  195.16    5.55 
  -7  -2  -2    0.88    0.56 
  -7   2  -2    1.00    0.53 
   7  -2   2    1.03    0.56 
   7   2   2    0.08    0.59 
   8  -2   2   49.14    2.37 
   8   2   2   48.67    2.43 
  -8   2  -2   50.96    2.33 
  -8  -2  -2   51.82    2.39 
   9   2   2    7.95    1.20 
  -9   2  -2   10.26    1.16 
  -9  -2  -2    7.23    1.10 
   9  -2   2   10.38    1.25 
  10   2   2   15.70    1.62 
 -10   2  -2   16.13    1.45 
 -10  -2  -2   15.88    1.56 
  10  -2   2   13.57    1.48 
  11  -2   2   10.80    1.47 
  11   2   2   12.11    1.55 
 -11  -3   2   13.56    1.60 
  11   3  -2   12.77    1.66 
  11  -3  -2   16.52    1.66 
 -11   3   2   17.56    1.63 
 -10  -3   2   -0.42    0.58 
 -10   3   2    0.47    0.51 
  10   3  -2    0.80    0.65 
  10  -3  -2   -0.40    0.63 
   9  -3  -2    7.16    1.12 
  -9   3   2    7.30    1.10 
  -9  -3   2    7.69    1.17 
   9   3  -2    7.36    1.16 
  -8  -3   2    3.00    0.74 
   8  -3  -2    1.54    0.60 
   8   3  -2    1.82    0.73 
  -8   3   2    2.41    0.69 
   7  -3  -2   -0.03    0.52 
  -7   3   2    0.60    0.59 
  -7  -3   2    0.47    0.57 
   7   3  -2    0.80    0.58 
  -6  -3   2    2.12    0.62 
   6   3  -2    2.02    0.56 
   6  -3  -2    2.57    0.57 
  -6   3   2    2.68    0.38 
  -6   3   2    1.57    0.52 
  -5   3   2   90.92    3.12 
  -5   3   2   89.40    2.77 
  -5  -3   2   94.23    3.20 
   5  -3  -2   88.60    2.82 
   5   3  -2   91.72    3.02 
   4  -3  -2    1.83    0.37 
  -4   3   2    2.28    0.35 
   4   3  -2    1.78    0.19 
  -4  -3   2    2.07    0.47 
  -4   3   2    2.39    0.46 
   4   3  -2    1.95    0.45 
   3  -3  -2  716.48   17.00 
   3   3  -2  707.03   17.19 
   3   3  -2  755.91   18.11 
  -3   3   2  722.29   18.24 
  -3  -3   2  722.55   18.50 
   2   3  -2   48.71    1.60 
  -2  -3   2   49.50    1.70 
   2  -3  -2   49.57    1.42 
  -2   3   2   49.41    1.63 
  -1   3   2 2164.63   50.97 
  -1   3   2 2150.08   55.59 
  -1   3   2 2146.66   49.94 
   1   3  -2 2158.96   50.61 
   0   3   2    5.12    0.32 
   0   3   2    5.24    0.41 
   0   3  -2    6.05    0.43 
  -1   3  -2  316.60    7.41 
   1   3   2  311.71    7.54 
   1   3   2  316.33    8.10 
  -1   3  -2  317.31    7.56 
   2   3   2    0.74    0.23 
   2  -3   2    0.74    0.24 
   2   3   2    0.72    0.19 
   3  -3   2    6.25    0.53 
   3   3   2    5.91    0.41 
   3   3   2    6.29    0.57 
  -4   3  -2    8.48    0.65 
  -4  -3  -2    9.46    0.72 
   4   3   2    6.95    0.67 
   4  -3   2    7.64    0.66 
   4   3   2    8.11    0.48 
   5   3   2   19.66    1.18 
   5   3   2   15.37    0.71 
  -5   3  -2   15.94    1.02 
  -5  -3  -2   15.75    1.06 
   5  -3   2   13.58    1.03 
  -6   3  -2   20.90    1.27 
  -6  -3  -2   23.72    1.39 
   6   3   2   21.77    1.36 
   6  -3   2   20.60    1.30 
  -7  -3  -2    4.35    0.81 
  -7   3  -2    5.86    0.83 
   7   3   2    3.95    0.84 
   7  -3   2    6.45    0.89 
   8   3   2   56.06    2.66 
  -8   3  -2   58.92    2.55 
  -8  -3  -2   60.15    2.65 
   8  -3   2   58.24    2.57 
  -9   3  -2   15.57    1.34 
  -9  -3  -2   13.09    1.39 
   9   3   2   15.88    1.58 
   9  -3   2   13.68    1.39 
 -10   3  -2   11.70    1.30 
  10  -3   2   11.58    1.36 
 -10  -3  -2   10.58    1.34 
  10   3   2   10.44    1.42 
  11  -3   2    7.54    1.32 
  11   3   2    6.83    1.37 
 -11  -4   2    0.91    0.83 
  11  -4  -2    0.16    0.73 
 -11   4   2    2.39    0.78 
  11   4  -2    1.48    0.94 
 -10  -4   2   16.65    1.64 
  10  -4  -2    9.77    1.26 
  10   4  -2   11.78    1.47 
 -10   4   2   13.02    1.43 
  -9   4   2    3.10    0.90 
  -9  -4   2    2.30    0.96 
   9  -4  -2    2.36    0.84 
   9   4  -2    2.19    0.84 
   8  -4  -2   36.74    1.89 
   8   4  -2   37.31    2.07 
  -8   4   2   35.13    2.04 
  -8  -4   2   35.88    2.04 
   7  -4  -2    4.27    0.76 
  -7   4   2    5.10    0.87 
   7   4  -2    3.91    0.82 
  -7  -4   2    4.48    0.89 
   6  -4  -2   24.79    1.32 
   6   4  -2   24.82    1.46 
  -6   4   2   26.16    1.22 
  -6  -4   2   27.31    1.58 
  -6   4   2   23.32    1.43 
   5   4  -2   99.47    3.26 
   5  -4  -2   97.81    3.01 
  -5   4   2   99.51    3.13 
  -5   4   2  100.05    3.37 
  -5  -4   2   98.71    3.41 
   5   4  -2   97.26    2.64 
   4  -4  -2   14.71    0.83 
  -4   4   2   14.68    0.88 
  -4  -4   2   16.13    1.02 
   4   4  -2   14.33    0.67 
   4   4  -2   15.35    1.03 
  -3   4   2  241.98    6.54 
   3   4  -2  236.74    6.24 
   3   4  -2  246.38    6.31 
   3  -4  -2  242.23    6.00 
   2   4  -2  144.88    3.87 
  -2   4   2  142.78    4.06 
   2  -4  -2  140.84    3.59 
  -1   4   2   29.55    0.92 
   1   4  -2   30.25    1.13 
  -1   4   2   29.20    1.19 
   0   4  -2    1.71    0.32 
   0   4   2    1.47    0.30 
   0   4   2    1.64    0.25 
   1   4   2  907.93   20.79 
  -1   4  -2  879.72   20.78 
   1   4   2  904.39   22.32 
  -1   4  -2  870.88   20.38 
   2   4   2   22.87    0.95 
   2   4   2   24.79    1.02 
   2  -4   2   23.14    0.97 
   3  -4   2  249.23    6.40 
   3   4   2  260.89    6.53 
   3   4   2  251.12    6.64 
   4   4   2   83.68    2.74 
   4   4   2   83.69    2.46 
   4  -4   2   83.92    2.62 
   5  -4   2  117.95    3.56 
  -5   4  -2  116.32    3.71 
   5   4   2  115.12    3.27 
   5   4   2  120.29    3.73 
   6   4   2   20.04    1.36 
  -6   4  -2   21.68    1.33 
   6  -4   2   21.49    1.31 
  -6  -4  -2   21.09    1.35 
   7  -4   2    0.01    0.46 
  -7  -4  -2    0.97    0.57 
   7   4   2    0.87    0.59 
  -7   4  -2    1.46    0.59 
   8   4   2   19.05    1.63 
   8  -4   2   23.11    1.59 
  -8  -4  -2   22.98    1.61 
  -8   4  -2   21.30    1.50 
   9   4   2   -0.01    0.60 
  -9  -4  -2    0.06    0.64 
   9  -4   2   -0.23    0.64 
  -9   4  -2    1.16    0.58 
 -10   4  -2   13.86    1.39 
  10   4   2   13.40    1.59 
  10  -4   2   11.69    1.38 
  11   4   2    0.78    0.79 
  11  -4   2    1.15    0.85 
  11   5  -2    4.64    1.23 
 -11   5   2    6.67    1.20 
  11  -5  -2    7.50    1.21 
  10  -5  -2    2.96    0.90 
  10   5  -2    1.01    0.81 
 -10  -5   2    4.74    1.10 
 -10   5   2    2.06    0.84 
  -9  -5   2    2.26    0.84 
   9  -5  -2    2.94    0.84 
   9   5  -2    3.63    0.99 
  -9   5   2    3.88    0.87 
  -8  -5   2   81.96    3.41 
   8   5  -2   74.89    3.22 
  -8   5   2   72.44    3.23 
   8  -5  -2   77.50    2.97 
  -7  -5   2    1.47    0.68 
  -7   5   2    1.62    0.60 
   7   5  -2    1.79    0.64 
   7  -5  -2    1.48    0.59 
  -6   5   2  193.05    5.64 
  -6   5   2  199.41    6.03 
   6   5  -2  195.02    5.77 
   6  -5  -2  193.96    5.43 
  -6  -5   2  195.64    6.05 
   5   5  -2    6.91    0.82 
   5  -5  -2    8.36    0.72 
   5   5  -2    6.20    0.49 
  -5   5   2    6.64    0.79 
  -5   5   2    7.79    0.73 
   4   5  -2  218.92    6.08 
   4   5  -2  228.86    5.97 
  -4   5   2  222.99    6.29 
   4  -5  -2  229.23    5.79 
   3  -5  -2   80.31    2.36 
  -3   5   2   83.82    2.74 
   3   5  -2   83.15    2.52 
   3   5  -2   85.71    2.69 
   2   5  -2   63.69    2.10 
  -2   5   2   62.60    2.20 
   2   5  -2   66.62    2.14 
  -1   5   2  488.97   12.62 
   1   5  -2  491.59   11.76 
  -1   5   2  483.65   11.51 
   0   5  -2    0.04    0.25 
   0   5   2   -0.17    0.21 
   0   5   2    0.25    0.22 
   1   5   2  933.23   21.78 
  -1   5  -2  926.94   21.80 
   1   5   2  937.49   23.44 
   2   5   2    5.70    0.54 
   2   5   2    5.30    0.52 
   3  -5   2  131.26    3.58 
   3   5   2  129.30    3.68 
   3   5   2  122.73    3.63 
   4  -5   2   56.62    1.98 
   4   5   2   53.78    2.07 
   4   5   2   54.89    1.86 
  -5   5  -2    2.65    0.54 
   5   5   2    1.71    0.33 
   5  -5   2    1.72    0.54 
   5   5   2    2.57    0.63 
   6   5   2  108.46    3.66 
   6  -5   2  104.78    3.45 
  -6   5  -2  106.91    3.64 
   7  -5   2    9.10    0.99 
   7   5   2    6.97    0.99 
  -7   5  -2    8.74    0.97 
  -8   5  -2   58.56    2.66 
   8  -5   2   63.34    2.66 
   8   5   2   58.84    2.79 
  -9   5  -2    0.30    0.58 
   9  -5   2    1.15    0.71 
   9   5   2    0.86    0.69 
  10  -5   2    2.67    0.88 
  10   5   2    3.12    1.05 
  11   5   2    5.12    1.24 
  11  -5   2    5.99    1.19 
  11   6  -2   -0.12    0.75 
 -11   6   2    1.40    0.66 
  10  -6  -2   10.97    1.33 
  10   6  -2   14.19    1.67 
 -10   6   2   12.66    1.51 
   9   6  -2    0.41    0.68 
   9  -6  -2    1.22    0.61 
  -9   6   2    1.22    0.62 
  -8   6   2   13.47    1.43 
   8   6  -2   13.76    1.47 
   8  -6  -2   13.83    1.26 
  -7   6   2    0.72    0.47 
   7   6  -2    1.46    0.63 
   7  -6  -2    0.25    0.48 
  -7   6   2    1.45    0.57 
   6  -6  -2    0.28    0.48 
  -6   6   2    0.18    0.49 
   6   6  -2   -0.02    0.58 
  -6   6   2   -0.48    0.40 
   5   6  -2   15.11    1.20 
  -5   6   2   18.85    1.16 
   5  -6  -2   20.79    1.09 
   5   6  -2   20.55    0.93 
   4   6  -2   65.23    2.25 
  -4   6   2   69.06    2.55 
   4   6  -2   67.01    2.52 
   4  -6  -2   71.16    2.22 
   3   6  -2   26.67    1.18 
  -3   6   2   25.30    1.31 
   3  -6  -2   26.82    1.07 
   3   6  -2   26.50    1.34 
  -2   6   2  128.49    3.42 
   2   6  -2  133.20    3.90 
  -2   6   2  130.28    4.05 
   2   6  -2  134.92    3.80 
  -2   6   2  130.98    3.36 
  -1   6   2  142.19    4.28 
  -1   6   2  143.91    3.71 
   1   6  -2  145.17    3.97 
   0   6  -2    6.57    0.56 
   0   6   2    7.50    0.56 
   0   6   2    6.56    0.67 
   1   6   2   20.43    0.92 
  -1   6  -2   21.00    0.95 
   1   6   2   18.85    1.01 
  -2   6  -2   55.84    1.81 
   2   6   2   57.29    1.96 
   2   6   2   58.38    2.07 
  -2   6  -2   59.98    1.88 
   3   6   2    0.36    0.32 
   3   6   2    0.54    0.27 
   3  -6   2    0.57    0.31 
   4  -6   2   10.58    0.83 
   4   6   2   10.07    0.90 
   4   6   2   11.11    0.74 
   5  -6   2   36.56    1.62 
   5   6   2   36.21    1.77 
   5   6   2   37.70    1.44 
   6  -6   2    1.92    0.62 
  -6   6  -2    2.40    0.65 
   6   6   2    3.22    0.78 
  -7   6  -2   -0.30    0.42 
   7   6   2    0.66    0.63 
   7  -6   2    1.34    0.57 
   8  -6   2   23.54    1.63 
   8   6   2   22.41    1.84 
  -8   6  -2   27.18    1.73 
   9  -6   2    7.15    1.09 
   9   6   2    8.22    1.27 
  -9   6  -2    8.98    1.17 
  10  -6   2    5.80    1.08 
  10   6   2    4.57    1.18 
  11  -6   2    4.95    1.13 
  11   6   2    7.20    1.41 
  11   7  -2    3.23    1.16 
 -11   7   2    6.02    1.25 
  10   7  -2    1.88    0.98 
 -10   7   2    1.37    0.84 
  -9   7   2    3.80    0.87 
   9   7  -2    2.86    0.86 
   9  -7  -2    2.97    0.77 
  -8   7   2   28.26    1.97 
   8  -7  -2   25.40    1.62 
   8   7  -2   26.42    1.89 
   7   7  -2    5.64    1.02 
  -7   7   2    4.79    0.76 
  -7   7   2    4.17    0.87 
   7  -7  -2    5.08    0.76 
  -6   7   2   24.91    1.58 
   6   7  -2   24.61    1.75 
  -6   7   2   32.60    1.85 
   6  -7  -2   27.77    1.47 
   5  -7  -2   32.12    1.42 
   5   7  -2   28.69    1.29 
   5   7  -2   29.32    1.66 
  -5   7   2   30.64    1.61 
   4   7  -2   11.95    0.88 
   4   7  -2   10.77    1.02 
   4  -7  -2   11.53    0.83 
  -4   7   2   10.73    1.00 
  -3   7   2  413.73   11.26 
   3   7  -2  420.20   11.01 
   3   7  -2  427.28   10.58 
  -3   7   2  414.95    9.90 
  -3   7   2  417.13   10.11 
  -2   7   2    7.22    0.74 
  -2   7   2    8.01    0.57 
   2   7  -2    7.91    0.73 
   2   7  -2    7.29    0.69 
  -1   7   2  266.02    6.55 
  -1   7   2  267.35    7.40 
   1   7  -2  259.47    6.80 
   0   7   2    1.03    0.38 
   0   7   2    0.74    0.29 
   0   7  -2    0.56    0.31 
  -1   7  -2   30.13    1.24 
   1   7   2   29.74    1.39 
   1   7   2   25.58    1.16 
  -2   7  -2   16.90    0.92 
   2   7   2   15.80    1.00 
  -2   7  -2   15.45    0.92 
   2   7   2   13.63    1.00 
   3   7   2    0.77    0.40 
   3   7   2    1.53    0.41 
   4  -7   2   24.33    1.26 
   4   7   2   19.97    1.19 
   4   7   2   20.49    1.38 
   5  -7   2    0.30    0.43 
   5   7   2    0.50    0.48 
   5   7   2    0.52    0.37 
   6  -7   2    0.02    0.52 
  -6   7  -2   -0.14    0.46 
   6   7   2    0.97    0.68 
   7  -7   2    9.31    1.01 
   7   7   2    9.66    1.22 
  -7   7  -2    9.79    1.10 
   8  -7   2    6.87    1.00 
   8   7   2    7.76    1.23 
  -8   7  -2    7.81    1.07 
   9  -7   2    8.59    1.13 
  -9   7  -2    8.03    1.14 
   9   7   2    6.93    1.25 
  10   7   2    2.83    1.08 
  10  -7   2    3.50    0.94 
  11   7   2    1.09    0.89 
  11  -7   2    2.21    0.91 
 -10   8   2    0.45    0.64 
  10   8  -2   -0.15    0.69 
   9   8  -2    2.99    0.99 
  -9   8   2    3.81    0.97 
   8   8  -2    3.42    0.93 
   8  -8  -2    4.59    0.84 
  -8   8   2    3.49    0.96 
  -7   8   2    2.95    0.89 
  -7   8   2    1.68    0.73 
   7   8  -2    3.50    0.98 
   7  -8  -2    3.39    0.74 
  -6   8   2   54.22    2.38 
   6   8  -2   49.37    2.39 
   6  -8  -2   51.62    2.06 
   5  -8  -2   59.96    2.18 
   5   8  -2   55.98    2.49 
  -5   8   2   60.73    2.57 
   5   8  -2   62.64    2.22 
  -4   8   2   83.47    3.14 
   4   8  -2   84.83    3.07 
   4   8  -2   84.54    2.87 
   3   8  -2  134.85    4.16 
  -3   8   2  132.74    3.58 
  -3   8   2  135.72    4.40 
  -3   8   2  134.01    3.66 
   3   8  -2  135.44    4.12 
  -2   8   2   20.41    0.93 
   2   8  -2   15.97    1.12 
  -2   8   2   18.70    1.28 
   2   8  -2   18.39    1.19 
  -1   8   2   70.30    2.69 
  -1   8   2   73.05    2.21 
   1   8  -2   74.47    2.45 
   0   8  -2    8.10    0.71 
   0   8   2    8.66    0.64 
   0   8   2    7.26    0.80 
   1   8   2  414.75   10.09 
  -1   8  -2  410.43   10.12 
   1   8   2  403.51   10.99 
  -2   8  -2   18.10    0.99 
   2   8   2   17.61    1.08 
   2   8   2   16.94    1.14 
  -3   8  -2  453.77   10.81 
   3   8   2  442.68   11.22 
  -3   8  -2  449.14   11.01 
   3   8   2  445.27   11.87 
   4   8   2  154.48    4.58 
   4   8   2  146.64    4.53 
   5  -8   2   39.35    1.76 
   5   8   2   39.66    1.72 
   5   8   2   37.34    1.93 
   6   8   2   93.09    3.48 
   6  -8   2   92.74    3.22 
   7   8   2    1.48    0.80 
  -7   8  -2    0.91    0.59 
   7  -8   2    0.51    0.56 
  -7   8  -2   -0.15    0.56 
  -8   8  -2    5.48    0.96 
   8   8   2    5.12    1.10 
   8  -8   2    3.34    0.83 
   9   8   2    0.68    0.77 
  -9   8  -2    1.38    0.70 
   9  -8   2    1.51    0.73 
  10  -8   2    2.67    0.85 
  10   8   2    3.01    1.07 
  10   9  -2    0.20    0.76 
 -10   9   2    0.83    0.71 
   9   9  -2    7.46    1.38 
  -9   9   2    9.02    1.37 
   8   9  -2    1.45    0.81 
  -8   9   2    1.17    0.65 
  -7   9   2   -0.40    0.59 
   7  -9  -2    0.34    0.54 
   7   9  -2    1.00    0.72 
  -7   9   2   -0.69    0.55 
   6   9  -2    0.49    0.58 
  -6   9   2    0.72    0.53 
   6  -9  -2    1.02    0.52 
   5   9  -2   39.47    2.09 
   5   9  -2   39.87    1.78 
  -5   9   2   36.83    1.99 
  -4   9   2   14.39    1.17 
   4   9  -2   10.94    0.97 
  -4   9   2   14.62    0.87 
   4   9  -2   13.14    1.17 
  -4   9   2   13.87    0.88 
  -3   9   2  767.89   18.09 
   3   9  -2  750.74   19.70 
   3   9  -2  768.92   18.64 
  -3   9   2  766.25   20.00 
  -2   9   2   87.20    3.22 
   2   9  -2   83.07    2.94 
  -2   9   2   86.58    2.62 
   2   9  -2   90.70    3.15 
  -1   9   2 1116.17   28.53 
   1   9  -2 1098.64   26.42 
  -1   9   2 1110.23   26.15 
   1   9  -2 1139.42   28.43 
   0   9  -2   -0.24    0.34 
   0   9   2    0.00    0.32 
   0   9   2    1.11    0.49 
   1   9   2  794.28   18.88 
   1   9   2  783.61   20.48 
  -1   9  -2  796.53   18.93 
   2   9   2   37.54    1.77 
   2   9   2   35.54    1.60 
  -2   9  -2   36.25    1.53 
   3   9   2   47.39    2.03 
   3   9   2   46.99    2.07 
  -3   9  -2   51.15    1.86 
  -3   9  -2   51.36    1.90 
  -4   9  -2   -0.06    0.35 
  -4   9  -2    0.27    0.36 
   4   9   2    0.27    0.35 
   4   9   2    0.26    0.48 
   5   9   2    4.43    0.86 
   5   9   2    4.95    0.70 
   6  -9   2   69.41    2.66 
   6   9   2   69.02    2.99 
   7   9   2    1.18    0.76 
   7  -9   2    1.75    0.70 
  -7   9  -2    2.24    0.73 
  -7   9  -2    1.38    0.71 
  -8   9  -2   76.40    3.39 
   8  -9   2   79.61    3.12 
   8   9   2   74.75    3.44 
   9  -9   2   11.04    1.28 
  -9   9  -2   13.93    1.49 
   9   9   2   11.63    1.54 
  10   9   2   18.12    1.97 
  10  10  -2    1.13    0.94 
 -10  10   2    1.32    0.73 
  -9  10   2   16.10    1.76 
   9  10  -2   12.91    1.72 
  -8  10   2    0.68    0.61 
   8  10  -2    0.77    0.77 
  -7  10   2   -0.39    0.63 
   7  10  -2    0.91    0.81 
  -7  10   2    1.70    0.81 
  -6  10   2   11.56    1.21 
   6  10  -2    8.75    1.18 
   5  10  -2   36.72    2.05 
   5  10  -2   36.33    1.79 
  -5  10   2   37.50    2.13 
  -5  10   2   38.48    1.61 
  -5  10   2   38.89    1.65 
  -4  10   2   16.97    1.03 
  -4  10   2   16.71    1.36 
   4  10  -2   14.91    1.14 
   4  10  -2   15.51    1.32 
  -4  10   2   16.66    1.00 
  -3  10   2  108.93    3.90 
   3  10  -2   89.52    3.42 
   3  10  -2  106.09    3.62 
  -3  10   2  110.92    3.13 
   2  10  -2    4.01    0.69 
  -2  10   2    2.67    0.72 
   2  10  -2    4.07    0.70 
  -2  10   2    3.90    0.56 
  -1  10   2   19.28    1.03 
   1  10  -2   18.89    1.30 
  -1  10   2   20.65    1.41 
   1  10  -2   19.15    1.20 
   0  10   2    0.76    0.40 
   0  10  -2    0.74    0.44 
   0  10   2    0.52    0.49 
   0  10  -2    0.01    0.41 
   1  10   2  405.98   11.21 
   1  10   2  408.70   10.21 
  -1  10  -2  409.19   10.24 
   2  10   2   22.35    1.30 
   2  10   2   23.71    1.46 
  -2  10  -2   23.53    1.26 
  -3  10  -2  468.12   11.65 
   3  10   2  468.78   12.68 
   3  10   2  471.60   11.92 
   4  10   2  149.01    4.56 
   4  10   2  137.53    4.53 
  -4  10  -2  137.67    4.14 
  -4  10  -2  139.11    4.06 
  -5  10  -2   29.87    1.57 
   5  10   2   30.85    1.74 
  -5  10  -2   30.33    1.53 
   5  10   2   30.72    1.85 
   6  10   2   97.73    3.78 
  -6  10  -2  104.10    3.93 
   7  10   2   -1.08    0.63 
   7 -10   2    0.16    0.56 
  -7  10  -2   -0.87    0.54 
   8 -10   2    9.24    1.11 
  -8  10  -2    8.65    1.26 
   8  10   2    7.04    1.23 
   9  10   2   -0.39    0.76 
  -9  10  -2    1.90    0.77 
  10  10   2    3.83    1.11 
 -10  11   2    1.23    0.89 
  10  11  -2    1.82    1.03 
  -9  11   2    0.27    0.72 
   9  11  -2    0.74    0.82 
  -8  11   2   17.08    1.75 
   8  11  -2   13.90    1.71 
  -7  11   2    8.71    1.18 
   7  11  -2    8.09    1.32 
  -6  11   2   52.07    2.69 
   6  11  -2   55.17    2.73 
   5  11  -2    0.69    0.68 
  -5  11   2   -0.35    0.52 
   5  11  -2    0.09    0.47 
  -4  11   2   34.99    1.54 
   4  11  -2   34.13    1.97 
   4  11  -2   32.49    1.81 
  -4  11   2   33.82    2.08 
   3  11  -2  103.35    3.68 
  -3  11   2  104.99    3.14 
  -3  11   2  102.28    3.92 
   3  11  -2   98.37    3.52 
   2  11  -2    4.48    0.78 
  -2  11   2    3.81    0.56 
   2  11  -2    2.38    0.67 
  -2  11   2    5.13    0.89 
   1  11  -2  178.75    5.21 
   1  11  -2  187.66    5.76 
  -1  11   2  182.75    4.95 
  -1  11   2  174.63    5.77 
   0  11   2   29.98    1.78 
   0  11  -2   31.12    1.55 
   0  11   2   32.64    1.48 
   0  11  -2   29.23    1.75 
  -1  11  -2   27.04    1.70 
   1  11   2   25.28    1.63 
   1  11   2   28.47    1.42 
  -1  11  -2   26.23    1.39 
   2  11   2   99.57    3.68 
   2  11   2  101.76    3.35 
  -2  11  -2  100.84    3.25 
  -3  11  -2   15.75    1.08 
   3  11   2   11.83    1.16 
   3  11   2   11.96    1.11 
   4  11   2   54.23    2.43 
  -4  11  -2   51.35    2.14 
   4  11   2   54.22    2.44 
  -5  11  -2   28.90    1.54 
  -5  11  -2   30.20    1.91 
   5  11   2   28.28    1.84 
  -5  11  -2   29.60    1.52 
   5  11   2   29.47    1.71 
   6  11   2    1.33    0.82 
  -6  11  -2    0.95    0.59 
  -6  11  -2   -0.34    0.59 
  -6  11  -2    1.57    0.66 
  -7  11  -2    1.05    0.70 
  -7  11  -2    0.98    0.62 
  -7  11  -2    1.05    0.65 
   7  11   2    0.91    0.82 
  -8  11  -2   11.24    1.40 
   8  11   2   11.33    1.48 
  -9  11  -2    3.10    0.95 
   9  11   2    0.72    0.86 
   9  12  -2    4.92    1.25 
  -9  12   2    6.53    1.33 
   8  12  -2   10.56    1.56 
  -8  12   2   12.34    1.60 
   7  12  -2    0.61    0.75 
  -7  12   2    1.01    0.70 
  -6  12   2    0.56    0.70 
   6  12  -2    1.16    0.76 
   5  12  -2   -0.14    0.58 
  -5  12   2    0.92    0.65 
   5  12  -2   -0.84    0.43 
   4  12  -2   31.05    1.83 
   4  12  -2   33.34    1.99 
  -4  12   2   34.29    2.10 
   3  12  -2   -0.55    0.47 
   3  12  -2    0.39    0.53 
  -3  12   2    0.19    0.55 
  -3  12   2   -0.04    0.41 
  -2  12   2   39.56    1.69 
   2  12  -2   36.56    2.08 
   2  12  -2   39.44    1.97 
  -2  12   2   39.38    2.22 
  -1  12   2   43.51    1.87 
  -1  12   2   43.27    2.31 
   1  12  -2   50.06    2.40 
   1  12  -2   48.97    2.15 
   0  12  -2    1.75    0.62 
   0  12  -2   -0.03    0.66 
   0  12   2    1.32    0.55 
   0  12   2   -0.72    0.59 
   1  12   2   60.28    2.35 
   1  12   2   60.52    2.76 
  -1  12  -2   64.47    2.82 
  -1  12  -2   60.81    2.35 
  -2  12  -2    1.57    0.53 
  -2  12  -2   -0.76    0.57 
   2  12   2   -0.33    0.50 
   2  12   2    0.00    0.51 
  -3  12  -2   19.41    1.23 
   3  12   2   19.12    1.40 
  -3  12  -2   17.30    1.45 
   3  12   2   17.48    1.32 
   4  12   2   25.95    1.66 
  -4  12  -2   25.62    1.76 
   4  12   2   27.55    1.72 
  -4  12  -2   23.22    1.42 
   5  12   2    5.01    0.88 
  -5  12  -2    5.60    0.79 
  -5  12  -2    4.03    0.91 
   5  12   2    5.81    1.00 
   6  12   2   50.64    2.68 
  -6  12  -2   51.99    2.22 
  -6  12  -2   52.77    2.73 
  -6  12  -2   49.02    2.24 
   7  12   2    1.73    0.90 
  -7  12  -2   -0.01    0.75 
   8  12   2   29.08    2.19 
  -8  12  -2   31.21    2.24 
   9  12   2    1.78    1.03 
  -9  13   2    1.41    0.83 
   9  13  -2    1.17    0.92 
   8  13  -2   38.78    2.70 
  -8  13   2   36.72    2.60 
  -7  13   2    2.49    0.88 
   7  13  -2    0.42    0.75 
   6  13  -2  103.03    4.21 
  -6  13   2  103.29    4.29 
  -5  13   2    0.10    0.68 
   5  13  -2    0.47    0.70 
   5  13  -2   -0.10    0.55 
   4  13  -2   50.79    2.52 
  -4  13   2   45.82    2.63 
   4  13  -2   50.52    2.43 
   3  13  -2    1.03    0.58 
   3  13  -2   -0.09    0.51 
  -3  13   2   -0.18    0.56 
  -2  13   2    6.86    0.74 
   2  13  -2    6.51    0.98 
   2  13  -2    6.95    0.92 
  -2  13   2    6.29    1.06 
   1  13  -2   20.26    1.56 
   1  13  -2   19.24    1.34 
  -1  13   2   17.24    1.15 
  -1  13   2   16.67    1.50 
   0  13  -2    0.65    0.63 
   0  13   2    0.95    0.53 
   0  13   2    0.95    0.63 
   0  13  -2    1.06    0.60 
   1  13   2   93.42    3.20 
   1  13   2   94.61    3.74 
  -1  13  -2   91.15    3.19 
  -1  13  -2   96.88    3.80 
  -2  13  -2   43.07    2.37 
   2  13   2   40.83    2.24 
   2  13   2   38.05    1.93 
  -2  13  -2   45.60    1.97 
   3  13   2   54.21    2.41 
   3  13   2   52.71    2.52 
  -3  13  -2   48.33    2.59 
  -3  13  -2   45.06    2.07 
   4  13   2  108.83    3.98 
  -4  13  -2  111.65    4.36 
   4  13   2  104.55    4.06 
  -4  13  -2  111.27    3.63 
   5  13   2    4.19    0.92 
   5  13   2    6.34    1.13 
  -5  13  -2    5.68    1.09 
  -6  13  -2   59.72    3.04 
   6  13   2   54.69    2.88 
   7  13   2    0.57    0.77 
  -7  13  -2   -0.67    0.59 
   8  13   2    4.23    1.20 
  -8  13  -2    6.09    1.26 
   9  13   2    0.66    0.77 
   8  14  -2    3.46    1.15 
  -8  14   2    3.66    1.18 
  -7  14   2    1.30    0.92 
   7  14  -2    3.17    1.07 
  -6  14   2    2.70    0.96 
   6  14  -2    2.46    0.99 
  -5  14   2   14.49    1.63 
   5  14  -2   12.47    1.44 
   4  14  -2   20.80    1.71 
  -4  14   2   22.39    1.87 
   4  14  -2   22.19    1.69 
  -3  14   2   22.93    1.84 
   3  14  -2   23.86    1.73 
   3  14  -2   22.04    1.63 
   2  14  -2   23.51    1.61 
  -2  14   2   20.80    1.81 
   2  14  -2   26.48    1.83 
  -1  14   2   12.26    1.07 
  -1  14   2   12.16    1.40 
   1  14  -2   14.25    1.24 
   1  14  -2   12.01    1.35 
   0  14  -2    2.97    0.74 
   0  14  -2    2.89    0.91 
   0  14   2    2.92    0.66 
   0  14   2    1.68    0.80 
  -1  14  -2    0.88    0.63 
  -1  14  -2    0.00    0.70 
   1  14   2    0.18    0.57 
   1  14   2    0.70    0.67 
   2  14   2   33.41    1.83 
  -2  14  -2   36.89    2.29 
  -2  14  -2   33.25    1.75 
   2  14   2   33.03    2.11 
  -3  14  -2    8.24    0.97 
   3  14   2    7.44    1.04 
  -3  14  -2    6.24    1.17 
   3  14   2    8.56    1.16 
   4  14   2    8.73    1.17 
   4  14   2    9.75    1.19 
  -4  14  -2    6.73    1.15 
  -5  14  -2    9.74    1.36 
   5  14   2   11.87    1.33 
   5  14   2   10.10    1.32 
  -6  14  -2    0.43    0.68 
   6  14   2    0.49    0.82 
   7  14   2    1.67    0.90 
  -7  14  -2    0.69    0.79 
  -8  14  -2    6.92    1.30 
   8  14   2    5.68    1.33 
   8  15  -2    1.32    0.94 
  -7  15   2    1.18    0.88 
   7  15  -2    0.79    0.91 
   6  15  -2    3.27    1.02 
  -6  15   2    2.01    0.94 
  -5  15   2    0.50    0.79 
   5  15  -2   -0.18    0.73 
   4  15  -2   -0.40    0.62 
   4  15  -2   -1.17    0.55 
  -4  15   2    0.45    0.71 
   3  15  -2    4.19    1.02 
  -3  15   2    6.27    1.19 
   3  15  -2    5.00    1.04 
   2  15  -2    6.24    1.03 
   2  15  -2    6.23    1.13 
  -2  15   2    7.59    1.26 
  -1  15   2   22.24    1.94 
   1  15  -2   22.78    1.64 
   1  15  -2   20.74    1.77 
   0  15  -2   15.70    1.54 
   0  15   2   14.20    1.50 
   0  15  -2   13.85    1.24 
   0  15   2   13.49    1.18 
  -1  15  -2   12.27    1.16 
  -1  15  -2   10.88    1.38 
   1  15   2   10.91    1.44 
   1  15   2   10.22    1.10 
  -2  15  -2    0.22    0.61 
   2  15   2    2.18    0.81 
  -2  15  -2    1.48    0.61 
   2  15   2    1.60    0.70 
   3  15   2    0.05    0.64 
   3  15   2    1.71    0.73 
  -3  15  -2    1.04    0.73 
   4  15   2   -0.60    0.60 
  -4  15  -2    0.40    0.65 
   4  15   2    1.29    0.70 
  -5  15  -2    7.14    1.26 
   5  15   2    4.68    1.08 
   5  15   2    6.13    1.11 
  -6  15  -2    7.56    1.34 
   6  15   2    6.39    1.28 
   7  15   2    1.45    0.98 
  -7  15  -2    2.58    0.99 
   7  16  -2    0.35    0.93 
  -7  16   2    1.03    1.01 
   6  16  -2   -0.71    0.76 
  -6  16   2    0.19    0.92 
   5  16  -2    1.34    0.89 
  -5  16   2    1.70    0.95 
  -4  16   2   -0.41    0.65 
   4  16  -2    0.83    0.73 
   4  16  -2    1.61    0.72 
  -3  16   2   -1.23    0.66 
   3  16  -2    1.65    0.70 
   3  16  -2    0.91    0.74 
   2  16  -2   -0.74    0.56 
  -2  16   2   -0.59    0.56 
   2  16  -2   -0.17    0.54 
  -1  16   2    5.58    1.15 
   1  16  -2    7.54    1.21 
   1  16  -2    7.82    1.08 
   0  16  -2   -0.29    0.56 
   0  16   2    0.28    0.65 
   0  16  -2   -0.94    0.60 
   1  16   2   14.95    1.57 
  -1  16  -2   16.31    1.64 
  -1  16  -2   16.20    1.37 
   2  16   2    0.75    0.63 
  -2  16  -2   -0.01    0.76 
   2  16   2    2.02    0.78 
   3  16   2    6.51    1.14 
   3  16   2    6.96    1.08 
  -3  16  -2    5.93    1.26 
   4  16   2    4.92    1.10 
   4  16   2    3.98    0.99 
  -4  16  -2    3.18    1.09 
  -5  16  -2    2.11    0.89 
   5  16   2    0.42    0.87 
   6  16   2    6.46    1.30 
  -6  16  -2    5.54    1.28 
  -7  16  -2    0.11    0.81 
   7  16   2    0.47    0.87 
   6  17  -2   28.91    2.28 
  -6  17   2   27.12    2.32 
  -5  17   2    0.23    0.82 
   5  17  -2    0.75    0.88 
   4  17  -2   19.73    1.77 
   4  17  -2   19.24    1.71 
  -4  17   2   19.42    2.00 
   3  17  -2    0.07    0.63 
   3  17  -2   -0.03    0.65 
  -3  17   2    0.08    0.71 
   2  17  -2    6.15    1.18 
  -2  17   2    5.56    1.27 
   2  17  -2    5.25    1.00 
  -1  17   2    1.16    0.86 
   1  17  -2    2.04    0.88 
   1  17  -2    2.33    0.82 
   0  17   2    5.88    1.22 
   0  17  -2    4.96    1.18 
  -1  17  -2   13.40    1.63 
   1  17   2   13.24    1.58 
  -2  17  -2   17.97    1.82 
   2  17   2   21.14    1.83 
   3  17   2    8.87    1.34 
  -3  17  -2    9.81    1.47 
   3  17   2   10.71    1.27 
   4  17   2   39.21    2.53 
  -4  17  -2   43.83    2.79 
   4  17   2   38.55    2.34 
  -5  17  -2    5.93    1.28 
   5  17   2    5.51    1.20 
  -6  17  -2    9.24    1.52 
   6  17   2   11.49    1.57 
   5  18  -2    1.19    0.89 
  -5  18   2   -0.46    0.76 
  -4  18   2   17.76    1.92 
   4  18  -2   18.95    1.78 
   4  18  -2   15.09    1.62 
   3  18  -2    8.98    1.37 
  -3  18   2    5.84    1.31 
   3  18  -2    7.90    1.23 
   2  18  -2    6.51    1.10 
   2  18  -2    6.90    1.29 
  -2  18   2    6.83    1.33 
  -1  18   2   14.81    1.70 
   1  18  -2   15.28    1.68 
   0  18  -2    0.86    0.70 
   0  18   2    0.91    0.89 
   1  18   2   10.09    1.47 
  -1  18  -2    9.52    1.45 
  -2  18  -2    1.49    0.80 
   2  18   2    0.17    0.74 
  -3  18  -2   -0.92    0.64 
   3  18   2   -1.28    0.59 
   4  18   2    1.30    0.84 
  -4  18  -2    0.54    0.85 
   5  18   2    2.07    0.95 
  -5  18  -2    0.57    0.90 
   4  19  -2    6.56    1.23 
  -4  19   2    6.80    1.48 
   4  19  -2    6.04    1.26 
  -3  19   2    8.23    1.50 
   3  19  -2    6.10    1.25 
   2  19  -2   -0.23    0.69 
  -2  19   2   -0.70    0.74 
   1  19  -2    1.15    0.86 
  -1  19   2    0.31    0.82 
   0  19   2    0.84    0.75 
   0  19  -2    1.36    0.86 
   1  19   2    1.79    0.83 
  -1  19  -2    0.74    0.91 
   2  19   2    4.01    1.12 
  -2  19  -2    2.77    1.09 
  -3  19  -2    6.16    1.37 
   3  19   2    6.50    1.30 
  -4  19  -2   12.38    1.70 
   4  19   2   12.00    1.62 
  -1  20   2    6.14    1.35 
   1  20  -2    3.95    1.12 
   0  20   2   -0.10    0.77 
   0  20  -2   -0.36    0.70 
  -1  20  -2    9.88    1.57 
   1  20   2   10.97    1.62 
 -11   0   3   -0.60    0.61 
  11   0  -3   -1.14    0.57 
 -10   0   3    1.54    0.75 
  10   0  -3    0.72    0.78 
  -9   0   3   -1.29    0.44 
   9   0  -3   -0.23    0.57 
  -8   0   3    0.21    0.55 
   8   0  -3    0.72    0.60 
   7   0  -3   -0.13    0.41 
  -7   0   3   -0.51    0.38 
   6   0  -3    0.11    0.49 
  -6   0   3   -0.34    0.46 
   5   0  -3   -0.42    0.37 
  -5   0   3   -0.11    0.38 
  -4   0   3    0.24    0.36 
   4   0  -3    0.12    0.34 
   3   0  -3    0.13    0.24 
  -3   0   3    0.09    0.23 
  -2   0   3    0.31    0.11 
  -2   0   3    0.00    0.18 
   2   0  -3    0.18    0.18 
  -1   0   3   -0.03    0.07 
   1   0  -3   -0.04    0.08 
  -1   0   3   -0.05    0.10 
  -1   0  -3    0.32    0.06 
   1   0   3   -0.03    0.05 
   1   0   3    0.12    0.09 
   1   0   3    0.27    0.12 
  -2   0  -3    0.08    0.11 
   2   0   3   -0.14    0.10 
   2   0   3   -0.20    0.16 
   3   0   3    0.38    0.17 
  -3   0  -3    0.10    0.18 
   3   0   3    0.20    0.23 
   4   0   3   -0.23    0.31 
  -4   0  -3    0.26    0.26 
   4   0   3    0.54    0.21 
  -5   0  -3   -0.19    0.32 
   5   0   3    0.64    0.44 
   6   0   3   -0.66    0.44 
  -6   0  -3   -0.62    0.36 
  -7   0  -3    0.92    0.55 
   7   0   3    0.04    0.59 
   8   0   3    0.28    0.59 
  -8   0  -3   -0.35    0.41 
  -9   0  -3    0.24    0.58 
   9   0   3    0.45    0.69 
  10   0   3    0.07    0.70 
  11   0   3   -0.43    0.77 
  11   1  -3   14.62    1.61 
 -11   1   3   15.37    1.66 
  11  -1  -3   14.49    1.57 
 -11  -1   3   15.42    1.66 
 -10  -1   3    1.01    0.76 
 -10   1   3    2.04    0.75 
  10   1  -3    0.59    0.77 
  10  -1  -3    0.88    0.76 
  -9  -1   3   13.30    1.37 
  -9   1   3   11.40    1.34 
   9  -1  -3   12.22    1.28 
   9   1  -3   13.03    1.36 
   8  -1  -3    1.45    0.67 
  -8   1   3    1.97    0.69 
   8   1  -3    2.11    0.73 
  -8  -1   3    1.76    0.69 
   7  -1  -3   -0.31    0.46 
  -7   1   3   -0.12    0.47 
   7   1  -3   -0.39    0.41 
  -7  -1   3    0.42    0.48 
  -6  -1   3   73.90    2.82 
  -6   1   3   75.83    2.85 
   6   1  -3   72.15    2.68 
   6  -1  -3   72.10    2.58 
  -5   1   3   26.65    0.87 
  -5  -1   3   24.64    1.37 
   5   1  -3   24.38    1.30 
   5  -1  -3   25.34    1.27 
  -5   1   3   25.89    1.35 
  -4  -1   3  395.19   10.71 
   4  -1  -3  411.79    9.90 
   4   1  -3  404.65    9.97 
  -4   1   3  409.38   10.21 
  -4   1   3  403.53   10.72 
   3   1  -3   16.17    0.82 
  -3  -1   3   15.28    0.84 
   3  -1  -3   16.13    0.76 
  -3   1   3   16.51    0.85 
  -3   1   3   15.89    0.61 
  -2  -1   3  105.30    3.07 
  -2   1   3  111.46    2.88 
   2  -1  -3  108.36    2.76 
  -2   1   3  105.62    3.05 
   2   1  -3  109.07    2.85 
   1  -1  -3  305.14    7.05 
  -1  -1   3  284.48    7.49 
  -1  -1   3  288.05    7.57 
   1   1  -3  299.84    7.06 
  -1   1   3  301.48    7.51 
   0   1   3   36.17    0.95 
   0   1  -3   36.82    1.03 
   0  -1   3   34.26    1.07 
   0  -1  -3   36.81    0.94 
   0   1   3   36.03    1.08 
   1  -1   3  210.67    5.13 
   1  -1   3  205.80    5.44 
   1   1   3  216.57    5.44 
   1   1   3  210.85    5.09 
   2  -1   3  175.04    4.64 
   2  -1   3  174.63    4.44 
  -2   1  -3  177.88    4.60 
   2   1   3  170.78    4.43 
  -2  -1  -3  177.65    4.63 
   2   1   3  180.24    4.61 
   3  -1   3   74.02    2.26 
  -3   1  -3   74.58    2.24 
   3   1   3   75.58    2.29 
   3   1   3   77.77    2.17 
  -3  -1  -3   74.42    2.26 
  -4  -1  -3    1.46    0.38 
   4   1   3    1.62    0.45 
   4  -1   3    0.83    0.41 
   4   1   3    1.62    0.27 
  -4   1  -3    1.52    0.36 
   5  -1   3    1.97    0.53 
  -5  -1  -3    0.30    0.37 
   5   1   3    0.41    0.26 
  -5   1  -3    0.20    0.38 
   5   1   3    0.57    0.50 
  -6   1  -3   35.46    1.62 
   6   1   3   30.75    1.71 
   6  -1   3   33.66    1.71 
  -6  -1  -3   35.83    1.65 
   7   1   3   16.14    1.35 
  -7   1  -3   16.98    1.21 
   7  -1   3   16.93    1.31 
  -7  -1  -3   16.39    1.21 
   8  -1   3   45.47    2.30 
  -8  -1  -3   49.13    2.25 
   8   1   3   48.64    2.34 
  -8   1  -3   44.38    2.15 
   9  -1   3    1.87    0.75 
  -9  -1  -3    1.56    0.71 
   9   1   3    0.29    0.74 
  -9   1  -3    2.17    0.72 
  10   1   3   13.66    1.48 
  10  -1   3   13.47    1.53 
 -10  -1  -3   13.10    1.38 
  11   1   3    0.69    0.85 
  11  -1   3    1.35    0.86 
  11   2  -3    4.53    1.14 
 -11   2   3    6.75    1.23 
 -11  -2   3    4.81    1.11 
  11  -2  -3    4.91    1.13 
 -10  -2   3    4.14    1.06 
  10   2  -3    3.09    0.93 
  10  -2  -3    6.24    1.10 
 -10   2   3    4.53    0.95 
   9  -2  -3   87.75    3.39 
  -9   2   3   84.43    3.61 
   9   2  -3   87.75    3.52 
  -9  -2   3   84.55    3.63 
  -8  -2   3   35.11    1.99 
   8   2  -3   34.11    1.91 
  -8   2   3   34.07    1.94 
   8  -2  -3   33.96    1.83 
   7  -2  -3  162.67    4.84 
  -7   2   3  157.67    5.21 
   7   2  -3  163.26    4.99 
  -7  -2   3  162.51    5.28 
  -6   2   3   83.98    2.38 
  -6  -2   3   80.38    3.02 
   6   2  -3   80.29    2.87 
   6  -2  -3   82.16    2.77 
  -6   2   3   79.40    2.99 
   5  -2  -3   33.49    1.47 
  -5   2   3   33.62    1.21 
  -5   2   3   31.33    1.59 
   5   2  -3   34.41    1.58 
  -5  -2   3   33.90    1.66 
  -4   2   3   14.56    0.92 
   4   2  -3   13.04    0.86 
   4  -2  -3   12.31    0.78 
  -4  -2   3   11.97    0.88 
  -4   2   3   12.27    0.65 
  -3   2   3    5.68    0.42 
   3  -2  -3    5.02    0.43 
  -3   2   3    4.31    0.47 
  -3  -2   3    4.99    0.51 
   3   2  -3    4.15    0.45 
   2   2  -3    5.04    0.43 
   2  -2  -3    5.57    0.34 
  -2  -2   3    4.50    0.41 
  -2   2   3    4.93    0.37 
  -1   2   3    0.56    0.16 
  -1  -2   3    0.90    0.19 
   1   2  -3    0.40    0.19 
   0   2   3  680.15   15.98 
   0   2   3  656.43   16.69 
   1   2   3 1037.16   23.98 
   1  -2   3 1024.51   24.01 
   1   2   3 1040.29   25.69 
   2  -2   3   82.58    2.35 
   2   2   3   85.30    2.37 
   2   2   3   84.32    2.36 
   3   2   3 1274.81   29.21 
   3  -2   3 1239.31   29.16 
  -3   2  -3 1226.80   31.21 
  -3  -2  -3 1253.73   31.27 
   3   2   3 1263.21   31.02 
  -4   2  -3   22.09    1.02 
   4   2   3   22.41    0.86 
   4   2   3   21.02    1.12 
  -4  -2  -3   21.78    1.06 
   4  -2   3   20.03    1.06 
   5   2   3  638.67   15.65 
   5   2   3  647.62   16.07 
   5  -2   3  629.57   15.55 
  -5   2  -3  652.78   16.53 
  -5  -2  -3  634.47   16.56 
  -6  -2  -3   49.78    2.05 
  -6   2  -3   48.23    1.99 
   6   2   3   44.46    2.06 
   6   2   3   47.93    1.54 
   6  -2   3   49.48    2.06 
   7  -2   3   73.30    2.77 
  -7   2  -3   67.08    2.66 
   7   2   3   61.83    2.70 
  -7  -2  -3   72.93    2.77 
   8   2   3    0.32    0.56 
  -8  -2  -3    0.92    0.52 
  -8   2  -3   -0.10    0.52 
   8  -2   3    0.40    0.65 
   9   2   3    3.66    1.03 
  -9  -2  -3    4.90    0.95 
  -9   2  -3    4.12    0.84 
   9  -2   3    4.24    0.96 
  10   2   3   32.68    2.20 
 -10  -2  -3   33.19    2.11 
  10  -2   3   30.04    2.10 
  11  -2   3    0.85    0.80 
  11   2   3    0.48    0.84 
 -11  -3   3   45.62    2.74 
  11   3  -3   43.27    2.66 
  11  -3  -3   44.35    2.54 
 -11   3   3   44.18    2.61 
  10   3  -3    0.18    0.60 
 -10   3   3    0.37    0.56 
 -10  -3   3   -0.89    0.59 
  10  -3  -3    0.04    0.63 
  -9  -3   3   43.79    2.51 
  -9   3   3   43.86    2.45 
   9  -3  -3   47.35    2.36 
   9   3  -3   43.66    2.43 
  -8  -3   3    0.85    0.59 
   8   3  -3    0.49    0.59 
  -8   3   3    0.31    0.53 
   8  -3  -3   -0.39    0.46 
  -7   3   3    1.01    0.62 
   7  -3  -3    0.61    0.54 
   7   3  -3    0.59    0.59 
  -7  -3   3    0.04    0.58 
  -6  -3   3   31.13    1.69 
  -6   3   3   32.22    1.24 
   6  -3  -3   30.98    1.46 
  -6   3   3   27.28    1.55 
   6   3  -3   25.54    1.52 
  -5   3   3   66.20    2.17 
   5  -3  -3   67.17    2.28 
  -5   3   3   70.68    2.58 
   5   3  -3   67.98    2.45 
  -5  -3   3   68.40    2.60 
  -4   3   3  449.46   11.45 
  -4   3   3  444.49   11.80 
  -4  -3   3  444.97   11.84 
   4   3  -3  450.04   11.04 
   4  -3  -3  445.75   10.79 
   3  -3  -3    8.61    0.55 
   3   3  -3    8.07    0.64 
   3   3  -3    8.18    0.44 
  -3   3   3    6.97    0.58 
  -3  -3   3    9.24    0.72 
   2   3  -3  737.44   18.02 
  -2  -3   3  770.09   19.39 
  -2   3   3  784.29   19.23 
   2  -3  -3  772.92   17.83 
  -1   3   3 1477.51   35.16 
  -1   3   3 1525.86   37.34 
  -1   3   3 1517.30   35.96 
   0   3  -3  420.55   10.13 
   0   3   3  423.17   10.81 
   0   3   3  431.31    9.99 
   1   3   3  692.95   17.21 
  -1   3  -3  671.42   16.06 
   1   3   3  698.75   16.04 
  -1   3  -3  683.00   15.76 
   2   3   3    0.44    0.18 
   2  -3   3    0.82    0.25 
   2   3   3    0.95    0.25 
   3  -3   3    5.95    0.55 
   3   3   3    7.90    0.48 
   3   3   3    5.83    0.54 
   4   3   3   21.50    1.13 
  -4  -3  -3   22.41    1.11 
   4   3   3   23.43    0.91 
   4  -3   3   20.86    1.10 
  -4   3  -3   21.80    1.04 
  -5  -3  -3   41.97    1.79 
   5  -3   3   44.72    1.80 
   5   3   3   41.61    1.86 
   5   3   3   43.45    1.44 
  -5   3  -3   43.34    1.75 
   6   3   3   82.66    2.46 
  -6  -3  -3   86.35    3.05 
   6   3   3   84.93    3.04 
  -6   3  -3   87.35    2.99 
   6  -3   3   84.41    2.96 
  -7  -3  -3   37.57    1.89 
   7   3   3   33.13    1.86 
   7  -3   3   35.82    1.86 
  -7   3  -3   39.38    1.87 
   8  -3   3  151.74    5.05 
  -8  -3  -3  169.00    5.33 
  -8   3  -3  160.48    5.18 
   8   3   3  159.17    5.25 
   9  -3   3    6.35    1.05 
  -9   3  -3    6.26    0.95 
   9   3   3    5.65    1.10 
  -9  -3  -3    7.51    1.10 
  10   3   3   52.46    2.82 
 -10  -3  -3   51.77    2.73 
  10  -3   3   57.33    2.85 
  11  -3   3    0.25    0.74 
  11   3   3   -1.32    0.70 
 -11  -4   3   10.64    1.53 
  11   4  -3    7.06    1.38 
  11  -4  -3    6.27    1.21 
 -11   4   3    9.30    1.34 
 -10  -4   3    0.88    0.72 
 -10   4   3    0.71    0.68 
  10   4  -3    0.77    0.65 
  10  -4  -3    0.50    0.68 
  -9   4   3   89.07    3.74 
   9   4  -3   84.34    3.60 
  -9  -4   3   86.66    3.79 
   9  -4  -3  100.46    3.57 
   8  -4  -3    5.62    0.87 
  -8  -4   3    5.28    0.97 
   8   4  -3    7.22    1.08 
  -8   4   3    6.42    1.04 
  -7   4   3   87.78    3.36 
  -7  -4   3   91.39    3.47 
   7  -4  -3   76.03    2.92 
   7   4  -3   91.17    3.33 
  -6   4   3  111.96    3.79 
   6  -4  -3  110.70    3.38 
   6   4  -3  108.17    3.65 
  -6  -4   3   98.66    3.73 
  -6   4   3  111.37    3.33 
  -5   4   3    4.13    0.56 
  -5   4   3    4.83    0.71 
  -5  -4   3    4.85    0.74 
   5   4  -3    5.41    0.76 
   5  -4  -3    6.34    0.64 
   4   4  -3  665.09   16.06 
  -4  -4   3  632.01   16.67 
  -4   4   3  630.11   16.63 
   4   4  -3  647.37   15.57 
   4  -4  -3  633.49   15.22 
  -4   4   3  637.49   16.34 
  -3   4   3   18.08    0.95 
   3   4  -3   17.48    0.97 
   3   4  -3   19.17    0.81 
  -3  -4   3   19.48    1.04 
   3  -4  -3   20.07    0.83 
   2  -4  -3  539.71   12.62 
   2   4  -3  527.79   12.91 
  -2   4   3  547.19   13.77 
  -1   4   3    3.26    0.26 
   1   4  -3    3.01    0.38 
  -1   4   3    3.36    0.39 
   0   4  -3  304.96    7.43 
   0   4   3  302.23    7.20 
   0   4   3  301.69    7.93 
   1   4   3  195.04    4.77 
  -1   4  -3  191.98    4.83 
  -1   4  -3  187.02    4.73 
   1   4   3  190.73    5.18 
   2   4   3   65.04    2.02 
   2  -4   3   60.95    1.95 
   2   4   3   62.17    1.95 
   3   4   3  406.29   10.31 
   3   4   3  399.73    9.89 
   3  -4   3  398.58    9.81 
   4   4   3   57.35    2.12 
   4   4   3   59.19    1.88 
   4  -4   3   59.17    2.06 
   5  -4   3   56.40    2.16 
   5   4   3   56.69    1.86 
  -5   4  -3   58.04    2.18 
   5   4   3   60.14    2.30 
   6   4   3  164.03    4.93 
   6   4   3  163.30    4.39 
  -6   4  -3  158.37    4.92 
   6  -4   3  159.76    4.74 
   7   4   3    3.64    0.80 
   7  -4   3    2.83    0.72 
  -7   4  -3    2.52    0.65 
  -7  -4  -3    3.24    0.73 
   8  -4   3   55.39    2.53 
   8   4   3   56.26    2.68 
  -8   4  -3   53.72    2.45 
  -8  -4  -3   54.87    2.58 
  -9   4  -3    0.84    0.57 
   9  -4   3   -0.38    0.55 
   9   4   3   -0.07    0.70 
  10   4   3    3.96    1.03 
  10  -4   3    2.73    0.93 
  11  -4   3    2.29    0.95 
  11   4   3    0.64    0.79 
  11   5  -3    3.29    1.11 
 -11   5   3    5.01    1.04 
  10  -5  -3    2.23    0.84 
 -10  -5   3    1.78    0.81 
 -10   5   3    0.65    0.62 
  10   5  -3    0.12    0.75 
  -9   5   3    0.67    0.61 
   9  -5  -3    0.10    0.57 
  -9  -5   3   -0.01    0.62 
   9   5  -3    0.77    0.66 
   8  -5  -3   66.49    2.71 
  -8   5   3   69.44    3.07 
   8   5  -3   62.42    2.90 
  -8  -5   3   68.36    3.11 
   7   5  -3   42.31    2.19 
   7  -5  -3   42.41    1.95 
  -7   5   3   44.21    2.22 
  -7  -5   3   51.58    2.39 
  -6  -5   3  208.84    6.22 
  -6   5   3  184.63    6.03 
  -6   5   3  201.62    5.71 
   6  -5  -3  198.11    5.47 
   6   5  -3  199.10    5.84 
  -5   5   3   44.56    2.02 
   5  -5  -3   46.97    1.76 
   5   5  -3   48.04    1.50 
   5   5  -3   42.95    1.96 
  -5   5   3   46.15    1.85 
  -5  -5   3   51.18    2.17 
  -4   5   3   25.98    1.33 
   4   5  -3   26.42    1.09 
   4  -5  -3   29.10    1.19 
   4   5  -3   26.27    1.43 
   3  -5  -3    0.78    0.27 
   3   5  -3    0.65    0.25 
  -3   5   3    0.54    0.32 
   3   5  -3    0.33    0.35 
  -2   5   3  275.73    6.49 
   2   5  -3  271.54    7.01 
  -2   5   3  272.71    7.44 
  -2   5   3  281.67    6.63 
  -1   5   3    0.69    0.32 
   1   5  -3    1.46    0.35 
  -1   5   3    2.76    0.27 
   0   5   3  404.76   10.55 
   0   5  -3  402.08    9.84 
   0   5   3  408.03    9.61 
   1   5   3   92.83    2.57 
   1   5   3   94.60    2.87 
  -1   5  -3   89.72    2.62 
   2   5   3   80.10    2.43 
   2   5   3   82.06    2.55 
   3  -5   3  592.22   14.11 
   3   5   3  575.10   14.16 
   3   5   3  592.74   14.94 
   4   5   3   20.62    1.21 
   4   5   3   20.03    0.97 
   4  -5   3   21.03    1.13 
   5   5   3  301.99    7.90 
   5  -5   3  289.06    7.70 
   5   5   3  294.47    7.75 
  -5   5  -3  294.18    8.14 
  -6   5  -3    5.58    0.74 
   6  -5   3    4.64    0.75 
   6   5   3    5.18    0.49 
   6   5   3    4.01    0.80 
   7  -5   3    2.73    0.71 
  -7   5  -3    3.31    0.72 
   7   5   3    4.12    0.87 
  -8   5  -3   23.04    1.55 
   8   5   3   21.59    1.70 
   8  -5   3   24.34    1.64 
  -9   5  -3    1.10    0.64 
   9   5   3    0.96    0.69 
   9  -5   3    0.60    0.68 
  10  -5   3   23.58    1.83 
  10   5   3   26.32    2.06 
  11  -5   3    0.70    0.83 
  11   5   3    1.29    0.81 
  11   6  -3    4.17    1.17 
 -11   6   3    5.61    1.14 
 -10   6   3    3.65    1.03 
  10   6  -3    3.08    1.02 
  10  -6  -3    4.07    0.97 
  -9   6   3   18.87    1.60 
   9  -6  -3   18.72    1.45 
   9   6  -3   18.96    1.63 
   8   6  -3    6.39    1.12 
   8  -6  -3    7.73    0.99 
  -8   6   3    6.80    1.16 
  -7   6   3    4.85    0.87 
   7  -6  -3    3.32    0.71 
   7   6  -3    2.61    0.78 
   6  -6  -3   71.39    2.54 
  -6   6   3   72.46    2.69 
  -6   6   3   72.71    2.98 
   6   6  -3   78.12    2.99 
   5   6  -3   -0.59    0.26 
   5   6  -3    0.12    0.44 
  -5   6   3    0.62    0.40 
   5  -6  -3    0.45    0.37 
   4   6  -3  850.09   20.39 
  -4   6   3  840.17   21.61 
   4  -6  -3  837.22   19.91 
   4   6  -3  853.14   21.27 
  -3   6   3    4.14    0.58 
   3  -6  -3    4.39    0.44 
   3   6  -3    3.39    0.45 
   3   6  -3    3.93    0.62 
  -2   6   3 1839.57   42.57 
   2   6  -3 1878.18   42.97 
  -2   6   3 1846.61   46.01 
  -2   6   3 1822.82   41.76 
  -1   6   3  311.96    7.63 
  -1   6   3  325.23    8.57 
   1   6  -3  313.43    7.97 
   0   6   3  258.49    6.33 
   0   6  -3  262.93    6.58 
   0   6   3  252.89    7.05 
  -1   6  -3  577.15   13.75 
   1   6   3  569.86   14.78 
   1   6   3  576.88   13.65 
   2   6   3    1.95    0.40 
   2   6   3    2.59    0.44 
   3   6   3   15.40    0.94 
   3  -6   3   14.35    0.89 
   3   6   3   14.87    0.89 
   4   6   3    6.38    0.73 
   4   6   3    6.43    0.60 
   4  -6   3    5.05    0.64 
   5   6   3   76.69    2.85 
   5  -6   3   80.46    2.74 
   5   6   3   81.32    2.56 
   6  -6   3   57.78    2.40 
   6   6   3   63.86    2.64 
  -6   6  -3   69.68    2.61 
   7  -6   3  112.46    3.79 
   7   6   3  112.80    4.06 
  -7   6  -3  110.85    3.94 
   8   6   3   81.09    3.44 
   8  -6   3   81.59    3.20 
  -8   6  -3   77.34    3.20 
   9   6   3    6.43    1.17 
  -9   6  -3    5.10    0.99 
   9  -6   3    5.43    1.01 
  10  -6   3   12.12    1.38 
  10   6   3    9.38    1.47 
  11  -6   3    3.44    1.04 
  11   6   3    3.44    1.11 
 -11   7   3    3.69    1.03 
  11   7  -3    3.25    1.07 
  10   7  -3    0.96    0.82 
 -10   7   3   -0.07    0.69 
   9   7  -3    9.73    1.35 
   9  -7  -3   11.06    1.17 
  -9   7   3   13.05    1.43 
   8  -7  -3   74.69    2.91 
  -8   7   3   77.13    3.39 
   8   7  -3   71.55    3.24 
   7   7  -3   23.66    1.76 
  -7   7   3   27.89    1.55 
  -7   7   3   27.49    1.79 
   7  -7  -3   22.02    1.41 
   6   7  -3  300.74    8.35 
   6  -7  -3  303.71    7.82 
  -6   7   3  292.95    8.44 
  -6   7   3  301.27    8.79 
  -5   7   3   19.42    1.27 
   5   7  -3   19.46    1.35 
   5   7  -3   18.73    1.02 
   5  -7  -3   18.83    1.09 
   4   7  -3  313.07    8.30 
  -4   7   3  304.66    8.67 
   4   7  -3  318.25    8.35 
   4  -7  -3  310.35    7.77 
  -3   7   3    2.33    0.37 
   3   7  -3    0.19    0.41 
  -3   7   3    2.53    0.38 
  -3   7   3   -0.07    0.43 
   3   7  -3    0.25    0.31 
  -2   7   3    0.78    0.37 
  -2   7   3    0.19    0.23 
   2   7  -3    0.05    0.32 
   1   7  -3    8.63    0.74 
  -1   7   3    8.36    0.77 
  -1   7   3    7.38    0.53 
   0   7   3  148.37    4.52 
   0   7  -3  154.17    4.19 
   0   7   3  148.97    3.95 
  -1   7  -3  374.56    9.38 
   1   7   3  387.74   10.18 
   1   7   3  378.52    9.29 
  -2   7  -3   59.47    1.95 
   2   7   3   60.53    2.20 
   2   7   3   55.47    1.99 
  -2   7  -3   57.97    1.97 
  -3   7  -3  921.05   21.50 
   3   7   3  946.63   23.52 
   3   7   3  930.33   22.08 
  -3   7  -3  910.80   21.91 
   4   7   3    6.66    0.68 
   4   7   3    5.44    0.75 
   4  -7   3    6.76    0.73 
   5  -7   3  216.22    6.11 
   5   7   3  227.86    6.23 
   5   7   3  225.16    6.36 
   6   7   3   12.91    1.21 
   6  -7   3   13.28    1.09 
  -6   7  -3   12.23    1.10 
   7   7   3    2.70    0.84 
  -7   7  -3    1.62    0.64 
   7  -7   3    2.07    0.67 
  -8   7  -3    2.00    0.72 
   8  -7   3    1.27    0.70 
   8   7   3    0.65    0.75 
   9  -7   3    4.75    0.98 
  -9   7  -3    4.22    0.93 
   9   7   3    5.33    1.20 
  10  -7   3    0.15    0.65 
  10   7   3    0.83    0.86 
  11   7   3    0.83    0.88 
  11  -7   3    0.35    0.76 
  10   8  -3    3.87    1.15 
 -10   8   3    2.37    0.91 
   9   8  -3    0.89    0.82 
  -9   8   3    1.35    0.76 
   8  -8  -3    5.82    0.85 
  -8   8   3    6.01    1.12 
   8   8  -3    5.99    1.16 
  -7   8   3    3.46    0.91 
   7  -8  -3    1.28    0.61 
  -7   8   3    0.30    0.67 
   7   8  -3    0.31    0.76 
   6   8  -3   12.86    1.28 
   6  -8  -3   11.57    1.00 
  -6   8   3   13.50    1.19 
  -5   8   3    3.00    0.75 
   5   8  -3    2.90    0.79 
   5  -8  -3    4.35    0.62 
   5   8  -3    2.85    0.55 
  -4   8   3  226.64    6.68 
   4   8  -3  214.21    6.35 
   4   8  -3  233.17    6.36 
  -3   8   3    0.94    0.33 
  -3   8   3   -0.04    0.48 
  -3   8   3    1.58    0.36 
   3   8  -3    0.45    0.41 
   3   8  -3    0.81    0.49 
   2   8  -3  660.63   17.05 
   2   8  -3  654.53   16.03 
  -2   8   3  668.10   17.23 
  -2   8   3  648.26   15.55 
  -1   8   3   87.34    3.10 
  -1   8   3   85.43    2.52 
   1   8  -3   89.50    2.86 
   0   8   3  165.74    5.00 
   0   8   3  161.05    4.33 
   0   8  -3  164.46    4.55 
   1   8   3  135.45    3.79 
  -1   8  -3  135.24    3.89 
   1   8   3  139.15    4.30 
   2   8   3    7.87    0.74 
  -2   8  -3    8.25    0.73 
   2   8   3    7.18    0.79 
   3   8   3    1.19    0.52 
   3   8   3    1.86    0.57 
  -3   8  -3    2.31    0.52 
  -3   8  -3    2.96    0.55 
   4   8   3    0.76    0.50 
   4   8   3   -0.15    0.36 
   5   8   3   46.05    1.88 
   5   8   3   42.32    2.06 
   5  -8   3   41.65    1.88 
   6  -8   3    5.96    0.84 
   6   8   3    5.15    0.96 
   7   8   3   38.89    2.20 
  -7   8  -3   39.92    2.11 
   7  -8   3   38.92    1.99 
   8   8   3   13.70    1.52 
  -8   8  -3   15.69    1.41 
   8  -8   3   14.04    1.31 
   9  -8   3    1.93    0.80 
  -9   8  -3    2.79    0.81 
   9   8   3    0.69    0.86 
  10   8   3    2.38    1.09 
  10  -8   3    3.51    0.96 
  10   9  -3    0.96    0.90 
 -10   9   3    2.51    0.84 
   9   9  -3    0.68    0.89 
  -9   9   3    1.14    0.89 
   8   9  -3   -0.11    0.61 
  -8   9   3   -0.14    0.55 
   7   9  -3    2.97    0.90 
  -7   9   3    1.59    0.75 
  -7   9   3    2.62    0.89 
  -6   9   3    1.82    0.63 
   6   9  -3    1.68    0.76 
   6  -9  -3    1.79    0.56 
  -5   9   3    4.59    0.84 
   5   9  -3    6.72    1.01 
   5   9  -3    4.46    0.69 
   4   9  -3    1.68    0.56 
  -4   9   3    2.26    0.46 
  -4   9   3    2.34    0.46 
  -4   9   3    2.13    0.65 
   4   9  -3    2.31    0.69 
   3   9  -3   20.95    1.40 
  -3   9   3   23.25    1.09 
  -3   9   3   20.62    1.57 
   3   9  -3   23.41    1.52 
  -2   9   3   18.83    1.41 
   2   9  -3   18.15    1.29 
   2   9  -3   20.81    1.34 
  -2   9   3   19.80    1.01 
  -1   9   3    4.16    0.83 
   1   9  -3    4.86    0.73 
  -1   9   3    6.03    0.61 
   0   9  -3   50.51    2.00 
   0   9   3   52.61    1.84 
   0   9   3   52.87    2.26 
   1   9   3   -0.04    0.49 
  -1   9  -3    0.53    0.41 
   1   9   3    0.43    0.39 
  -2   9  -3   86.59    2.82 
   2   9   3   88.87    3.17 
   2   9   3   90.75    2.90 
   3   9   3    6.53    0.78 
  -3   9  -3    6.46    0.70 
   3   9   3    6.34    0.76 
  -3   9  -3    6.02    0.68 
   4   9   3    0.55    0.47 
  -4   9  -3    1.85    0.50 
   4   9   3    1.13    0.49 
  -4   9  -3    1.45    0.47 
   5   9   3    1.67    0.68 
   5   9   3    2.32    0.56 
   6  -9   3    2.68    0.71 
   6   9   3    1.81    0.76 
   7   9   3    0.91    0.78 
   7  -9   3    0.81    0.65 
  -7   9  -3    1.26    0.62 
  -8   9  -3    3.09    0.85 
   8  -9   3    1.55    0.66 
   8   9   3    1.98    0.88 
   9   9   3    0.89    0.93 
  -9   9  -3    2.45    0.79 
   9  -9   3    0.66    0.69 
  10   9   3    3.42    1.14 
 -10  10   3    1.81    0.83 
  10  10  -3   -0.62    0.71 
   9  10  -3    2.63    1.09 
  -9  10   3    3.25    1.08 
   8  10  -3   -0.08    0.72 
  -8  10   3    0.50    0.65 
   7  10  -3    6.87    1.22 
  -7  10   3    4.00    1.03 
  -7  10   3    5.10    1.12 
   6  10  -3    2.62    0.84 
  -6  10   3    4.45    0.88 
  -5  10   3    0.22    0.39 
   5  10  -3   -0.26    0.41 
  -5  10   3   -0.92    0.49 
   5  10  -3    0.68    0.62 
  -5  10   3    0.10    0.38 
   4  10  -3   14.50    1.29 
  -4  10   3   13.96    1.27 
   4  10  -3   13.28    1.11 
  -4  10   3   14.84    0.95 
   3  10  -3    0.60    0.49 
   3  10  -3   -0.16    0.46 
  -3  10   3    0.31    0.53 
  -3  10   3    0.75    0.37 
  -2  10   3   21.90    1.51 
   2  10  -3   28.88    1.53 
   2  10  -3   25.71    1.50 
  -2  10   3   28.24    1.20 
  -1  10   3    1.34    0.58 
   1  10  -3    1.35    0.52 
  -1  10   3    1.88    0.42 
   1  10  -3    0.87    0.44 
   0  10  -3   82.50    2.79 
   0  10   3   82.87    3.16 
   0  10   3   81.36    2.59 
   1  10   3    0.34    0.41 
   1  10   3   -0.17    0.41 
  -1  10  -3    0.30    0.42 
   2  10   3   20.72    1.27 
  -2  10  -3   19.54    1.19 
   2  10   3   19.44    1.36 
  -3  10  -3   52.24    2.06 
   3  10   3   50.79    2.32 
   3  10   3   53.08    2.23 
   4  10   3    6.96    0.94 
   4  10   3    7.15    0.91 
  -4  10  -3    7.14    0.80 
  -4  10  -3    8.22    0.85 
   5  10   3   18.61    1.31 
  -5  10  -3   17.99    1.25 
   5  10   3   17.03    1.37 
  -5  10  -3   16.60    1.17 
   6  10   3    7.00    1.07 
   7  10   3   13.04    1.43 
  -7  10  -3   16.96    1.49 
   7 -10   3   18.83    1.46 
   8  10   3    3.68    0.98 
  -8  10  -3    3.35    0.92 
   8 -10   3    3.38    0.88 
   9  10   3    1.75    0.97 
  10  10   3    9.02    1.57 
 -10  11   3    2.32    0.96 
  -9  11   3    8.46    1.46 
   9  11  -3    9.42    1.52 
  -8  11   3   17.24    1.78 
   8  11  -3   15.87    1.80 
   7  11  -3    5.64    1.17 
  -7  11   3    6.64    1.13 
  -6  11   3   85.78    3.60 
   6  11  -3   86.24    3.58 
   5  11  -3    0.06    0.59 
   5  11  -3    0.36    0.48 
  -5  11   3    0.14    0.61 
   4  11  -3  107.97    3.92 
  -4  11   3  105.20    3.29 
  -4  11   3  119.76    4.27 
   4  11  -3  112.03    3.87 
  -3  11   3    2.27    0.50 
   3  11  -3    1.02    0.59 
   3  11  -3    1.86    0.69 
  -3  11   3    0.68    0.65 
   2  11  -3   16.71    1.30 
  -2  11   3   18.49    1.01 
   2  11  -3   13.55    1.18 
  -2  11   3   18.00    1.41 
  -1  11   3   52.20    2.45 
   1  11  -3   55.68    2.45 
  -1  11   3   51.10    1.90 
   1  11  -3   52.00    2.18 
   0  11   3    9.62    1.07 
   0  11   3    9.98    0.85 
   0  11  -3   11.02    0.97 
  -1  11  -3  156.33    4.55 
   1  11   3  154.87    5.09 
   1  11   3  152.88    4.45 
   2  11   3    7.05    0.95 
   2  11   3    6.27    0.80 
  -2  11  -3    7.09    0.82 
   3  11   3  146.32    4.77 
   3  11   3  135.10    4.39 
  -3  11  -3  145.75    4.29 
   4  11   3    0.61    0.57 
   4  11   3   -0.07    0.51 
  -4  11  -3   -0.23    0.45 
   5  11   3   42.27    2.20 
  -5  11  -3   40.23    1.86 
   5  11   3   40.66    2.07 
  -5  11  -3   39.59    1.90 
  -6  11  -3   21.06    1.44 
  -6  11  -3   20.46    1.36 
  -6  11  -3   19.41    1.62 
   6  11   3   20.59    1.69 
   7  11   3   -0.14    0.59 
  -7  11  -3    0.36    0.60 
  -7  11  -3   -0.58    0.54 
  -7  11  -3    0.51    0.64 
   8  11   3    4.91    1.13 
  -8  11  -3    4.39    1.04 
   9  11   3    0.98    0.96 
   9  12  -3   -0.56    0.79 
  -9  12   3    1.25    0.87 
  -8  12   3    6.00    1.23 
   8  12  -3    3.99    1.25 
  -7  12   3    1.59    0.79 
   7  12  -3    0.70    0.78 
  -6  12   3    5.15    1.05 
   6  12  -3    4.87    1.06 
  -5  12   3    1.77    0.71 
   5  12  -3    1.45    0.77 
   5  12  -3    0.13    0.56 
  -4  12   3  100.33    3.95 
   4  12  -3   99.16    3.68 
   4  12  -3   97.29    3.70 
  -3  12   3   17.35    1.52 
   3  12  -3   15.36    1.34 
   3  12  -3   15.81    1.30 
  -2  12   3  210.14    5.73 
  -2  12   3  218.20    6.89 
   2  12  -3  217.79    6.28 
   2  12  -3  219.54    6.72 
   1  12  -3   95.55    3.57 
  -1  12   3   85.80    3.53 
  -1  12   3   92.69    2.88 
   1  12  -3   84.90    3.13 
   0  12  -3  115.77    4.22 
   0  12   3  116.60    3.54 
   0  12  -3  120.97    3.77 
   0  12   3  108.80    4.20 
  -1  12  -3   49.98    2.07 
  -1  12  -3   48.19    2.42 
   1  12   3   45.00    1.95 
   1  12   3   43.65    2.27 
  -2  12  -3    2.47    0.59 
   2  12   3    0.98    0.62 
   2  12   3    2.75    0.65 
  -3  12  -3   18.01    1.24 
   3  12   3   15.93    1.28 
   3  12   3   18.01    1.37 
  -4  12  -3    2.60    0.65 
   4  12   3    1.06    0.66 
   4  12   3    2.39    0.71 
  -5  12  -3   37.05    2.19 
   5  12   3   31.35    2.01 
   5  12   3   36.39    2.01 
  -5  12  -3   35.63    1.83 
  -6  12  -3    4.58    1.02 
  -6  12  -3    5.80    0.89 
  -6  12  -3    6.66    0.95 
   6  12   3    5.96    1.15 
  -7  12  -3   29.06    2.10 
   7  12   3   29.84    2.10 
   8  12   3   10.77    1.53 
  -8  12  -3   10.69    1.41 
   9  12   3    2.28    1.03 
   9  13  -3    0.82    0.83 
  -9  13   3    1.49    0.87 
   8  13  -3    5.67    1.41 
  -8  13   3    7.18    1.36 
  -7  13   3   -0.22    0.66 
   7  13  -3   -0.04    0.76 
   6  13  -3   41.37    2.53 
  -6  13   3   41.62    2.54 
  -5  13   3    2.22    0.88 
   5  13  -3    2.02    0.71 
   5  13  -3    1.73    0.83 
   4  13  -3   10.94    1.14 
   4  13  -3   10.76    1.25 
  -4  13   3    9.48    1.32 
  -3  13   3    3.84    0.90 
   3  13  -3    6.18    0.93 
   3  13  -3    5.48    0.92 
   2  13  -3   23.03    1.63 
  -2  13   3   25.59    1.83 
   2  13  -3   24.08    1.58 
  -1  13   3    2.30    0.56 
   1  13  -3    1.94    0.71 
   1  13  -3    0.96    0.59 
  -1  13   3    1.14    0.66 
   0  13  -3  102.58    3.50 
   0  13  -3  105.87    4.01 
   0  13   3   99.93    3.96 
   0  13   3  102.16    3.30 
   1  13   3   36.19    2.13 
   1  13   3   37.00    1.77 
  -1  13  -3   36.07    1.79 
  -1  13  -3   39.69    2.19 
   2  13   3   23.58    1.50 
  -2  13  -3   26.41    1.53 
  -2  13  -3   24.87    1.79 
   2  13   3   24.93    1.76 
  -3  13  -3  106.96    3.56 
   3  13   3  106.40    4.01 
   3  13   3  105.54    3.70 
  -3  13  -3   98.45    4.09 
   4  13   3    0.11    0.64 
   4  13   3   -0.71    0.62 
  -4  13  -3   -0.99    0.66 
  -4  13  -3    0.24    0.56 
   5  13   3   54.87    2.61 
  -5  13  -3   45.13    2.18 
   5  13   3   45.49    2.45 
  -5  13  -3   44.19    2.59 
  -6  13  -3   -0.14    0.66 
   6  13   3    0.12    0.77 
  -7  13  -3    1.56    0.85 
   7  13   3    1.89    0.92 
   8  13   3    0.72    0.89 
  -8  13  -3    1.98    0.84 
   9  13   3    1.71    0.91 
   8  14  -3    0.85    0.91 
  -8  14   3    0.48    0.77 
  -7  14   3    9.16    1.44 
   7  14  -3    9.70    1.54 
   6  14  -3   16.63    1.78 
  -6  14   3   22.43    1.91 
  -5  14   3    6.99    1.30 
   5  14  -3    5.48    1.11 
   4  14  -3   61.45    2.92 
  -4  14   3   57.43    3.01 
   4  14  -3   66.59    2.95 
   3  14  -3    4.76    0.95 
   3  14  -3    4.72    0.97 
  -3  14   3    5.01    1.12 
   2  14  -3   34.98    2.12 
  -2  14   3   32.86    2.20 
   2  14  -3   33.91    1.93 
   1  14  -3   51.67    2.70 
   1  14  -3   61.44    2.54 
  -1  14   3   55.13    2.86 
   0  14  -3    3.40    0.79 
   0  14   3    1.55    0.86 
   0  14   3    3.72    0.71 
   0  14  -3    4.23    1.00 
   1  14   3  158.65    5.61 
  -1  14  -3  177.15    5.83 
  -1  14  -3  171.90    5.03 
   1  14   3  145.81    4.80 
  -2  14  -3   10.24    1.34 
   2  14   3   11.32    1.12 
  -2  14  -3   11.24    1.06 
   2  14   3   10.98    1.31 
   3  14   3   87.77    3.30 
  -3  14  -3   85.61    3.14 
   3  14   3   83.27    3.56 
  -3  14  -3   83.63    3.69 
   4  14   3    0.32    0.71 
   4  14   3   -0.15    0.57 
  -4  14  -3    0.08    0.61 
  -4  14  -3    0.10    0.65 
   5  14   3   15.75    1.53 
   5  14   3   17.45    1.60 
  -5  14  -3   18.71    1.71 
  -6  14  -3    2.02    0.84 
   6  14   3    2.09    0.89 
   7  14   3    0.00    0.75 
  -7  14  -3   -0.03    0.69 
   8  14   3    0.24    0.86 
  -8  15   3   -0.14    0.71 
  -7  15   3    0.88    0.84 
   7  15  -3   -0.20    0.80 
   6  15  -3    1.86    0.95 
  -6  15   3    1.48    0.87 
  -5  15   3    0.80    0.78 
   5  15  -3    0.16    0.78 
   4  15  -3   50.92    2.67 
  -4  15   3   48.00    2.78 
   4  15  -3   50.94    2.63 
   3  15  -3   11.06    1.32 
   3  15  -3   11.94    1.34 
  -3  15   3   13.33    1.55 
   2  15  -3   97.57    3.70 
   2  15  -3   97.74    4.04 
  -2  15   3  106.75    4.33 
   1  15  -3   77.25    3.51 
   1  15  -3   83.33    3.15 
  -1  15   3   76.51    3.61 
   0  15  -3   60.59    3.01 
   0  15  -3   57.63    2.51 
   0  15   3   58.70    3.03 
   1  15   3   45.04    2.12 
   1  15   3   44.53    2.61 
  -1  15  -3   46.92    2.61 
  -1  15  -3   51.23    2.27 
   2  15   3    3.96    0.85 
   2  15   3    4.80    1.03 
  -2  15  -3    4.48    0.83 
  -2  15  -3    4.69    1.02 
  -3  15  -3   -0.27    0.56 
  -3  15  -3    0.13    0.52 
   3  15   3    0.08    0.59 
   3  15   3    0.11    0.57 
  -4  15  -3   -0.76    0.50 
   4  15   3   -0.02    0.60 
   4  15   3    0.09    0.64 
  -5  15  -3   13.13    1.57 
   5  15   3   14.19    1.50 
   5  15   3   15.11    1.56 
  -6  15  -3    6.45    1.31 
   6  15   3    7.53    1.36 
  -7  15  -3    4.17    1.11 
   7  15   3    5.61    1.27 
  -7  16   3   14.84    1.82 
   7  16  -3   15.48    1.86 
   6  16  -3    9.93    1.56 
  -6  16   3   11.20    1.64 
  -5  16   3    0.79    0.95 
   5  16  -3    2.69    0.96 
  -4  16   3   14.25    1.65 
   4  16  -3   13.95    1.45 
   4  16  -3   10.42    1.36 
   3  16  -3    0.72    0.64 
  -3  16   3    0.72    0.85 
   3  16  -3    1.13    0.66 
   2  16  -3   -0.40    0.53 
   2  16  -3   -0.57    0.54 
  -2  16   3    0.14    0.65 
  -1  16   3    0.47    0.66 
   1  16  -3    3.92    0.88 
   1  16  -3    4.69    1.03 
   0  16  -3   13.38    1.28 
   0  16  -3   13.24    1.53 
   0  16   3   15.63    1.61 
  -1  16  -3   57.62    3.01 
   1  16   3   51.10    2.85 
  -1  16  -3   55.46    2.50 
  -2  16  -3    3.12    1.08 
   2  16   3    5.21    1.07 
   2  16   3    4.29    0.88 
   3  16   3   65.65    2.92 
   3  16   3   71.24    3.36 
  -3  16  -3   67.05    3.43 
   4  16   3    6.73    1.16 
  -4  16  -3    4.47    1.19 
   4  16   3    5.19    1.05 
  -5  16  -3   29.54    2.27 
   5  16   3   28.14    2.09 
  -6  16  -3   14.77    1.76 
   6  16   3   13.60    1.64 
   7  16   3    1.36    0.95 
  -7  16  -3    0.60    0.78 
  -6  17   3   -0.01    0.85 
   6  17  -3    0.42    0.89 
  -5  17   3    8.38    1.50 
   5  17  -3    9.96    1.49 
  -4  17   3    5.54    1.32 
   4  17  -3    4.83    1.05 
   4  17  -3    6.60    1.21 
   3  17  -3   -0.66    0.52 
  -3  17   3   -0.25    0.74 
   3  17  -3    0.85    0.73 
   2  17  -3    9.19    1.35 
  -2  17   3    8.56    1.44 
   2  17  -3   10.47    1.24 
  -1  17   3   11.27    1.53 
   1  17  -3   10.87    1.26 
   1  17  -3    9.96    1.40 
   0  17   3    1.60    0.80 
   0  17  -3    3.17    0.86 
   0  17  -3    2.57    0.97 
  -1  17  -3    7.76    1.37 
   1  17   3    7.69    1.32 
   2  17   3    2.53    0.93 
  -2  17  -3    1.56    0.91 
   3  17   3    0.80    0.75 
  -3  17  -3    1.91    0.94 
  -4  17  -3    4.01    1.16 
   4  17   3    3.58    0.95 
   4  17   3    2.54    0.99 
   5  17   3    6.76    1.27 
  -5  17  -3    7.51    1.40 
  -6  17  -3    2.08    1.00 
   6  17   3    2.17    1.07 
   5  18  -3    0.35    0.88 
  -5  18   3   -1.19    0.67 
   4  18  -3    4.22    1.11 
   4  18  -3    5.12    1.09 
  -4  18   3    3.84    1.20 
   3  18  -3    3.08    1.00 
  -3  18   3    4.18    1.21 
   3  18  -3    3.56    1.00 
   2  18  -3    2.57    0.87 
  -2  18   3    1.33    0.93 
   2  18  -3    1.61    0.87 
   1  18  -3    1.97    0.87 
  -1  18   3    1.39    0.85 
   0  18   3   -0.78    0.59 
   0  18  -3    0.41    0.70 
   1  18   3    0.80    0.76 
  -1  18  -3    1.66    0.87 
   2  18   3   -0.85    0.62 
  -2  18  -3    0.26    0.74 
   3  18   3   -0.45    0.63 
  -3  18  -3   -0.84    0.68 
  -4  18  -3    4.88    1.27 
   4  18   3    4.06    1.11 
  -5  18  -3   -1.70    0.71 
   4  19  -3    5.59    1.23 
  -4  19   3    4.30    1.29 
   4  19  -3    5.17    1.12 
   3  19  -3    1.53    0.85 
  -3  19   3    0.77    0.85 
   3  19  -3    2.74    0.92 
  -2  19   3    1.02    0.87 
   2  19  -3    2.01    0.92 
  -1  19   3    0.56    0.84 
   1  19  -3    0.28    0.85 
   0  19   3    0.64    0.78 
   0  19  -3    0.84    0.78 
   1  19   3    1.23    0.85 
  -1  19  -3    1.37    0.98 
   2  19   3    1.69    0.94 
  -2  19  -3    1.20    0.93 
  -3  19  -3    4.57    1.25 
   3  19   3    5.14    1.21 
   4  19   3    3.25    1.09 
  -4  19  -3    3.57    1.17 
   1  20  -3    0.58    0.79 
  -1  20   3    0.06    0.79 
   0  20   3    4.63    1.33 
   0  20  -3    4.45    1.18 
   1  20   3    0.86    0.88 
  -1  20  -3    2.46    0.99 
 -11   0   4    7.86    1.30 
  11   0  -4    3.85    1.07 
 -10   0   4    7.21    1.24 
  10   0  -4    7.07    1.17 
  -9   0   4    3.42    0.96 
   9   0  -4    4.05    0.92 
  -8   0   4    1.17    0.63 
   8   0  -4    0.72    0.57 
  -7   0   4    9.91    1.07 
   7   0  -4    9.35    0.99 
   6   0  -4   16.35    1.12 
  -6   0   4   19.65    1.34 
  -5   0   4  485.47   12.99 
   5   0  -4  493.65   12.03 
  -4   0   4  595.21   15.39 
   4   0  -4  592.38   14.22 
  -3   0   4  466.78   12.10 
   3   0  -4  461.66   11.15 
  -3   0   4  472.59   11.81 
  -2   0   4  522.68   13.52 
   2   0  -4  528.58   12.48 
  -2   0   4  543.29   13.36 
  -1   0   4   40.04    1.28 
   1   0  -4   41.86    1.17 
  -1   0   4   42.14    1.23 
   0   0  -4  833.44   19.75 
   0   0   4  856.06   22.14 
   0   0   4  876.26   21.14 
   0   0  -4  828.22   19.37 
   1   0   4  460.77   10.89 
   1   0   4  464.44   11.65 
  -2   0  -4  213.22    5.49 
   2   0   4  215.04    5.57 
   2   0   4  211.46    5.31 
   3   0   4   17.08    0.75 
  -3   0  -4   17.55    0.76 
   3   0   4   16.98    0.86 
   4   0   4   18.11    1.03 
   4   0   4   19.66    0.83 
  -4   0  -4   18.20    0.89 
  -5   0  -4  390.68   10.24 
   5   0   4  387.35    9.95 
   5   0   4  384.38    9.82 
   6   0   4    3.38    0.68 
  -6   0  -4    3.96    0.62 
  -7   0  -4  480.31   12.98 
   7   0   4  487.47   12.47 
  -8   0  -4   10.45    1.04 
   8   0   4   10.04    1.15 
  -9   0  -4  139.18    4.70 
   9   0   4  129.14    4.68 
  10   0   4    3.36    0.95 
  11   0   4    4.60    1.17 
  11   1  -4    2.34    0.87 
 -11   1   4    2.23    0.84 
  11  -1  -4    1.45    0.91 
 -11  -1   4    2.63    0.91 
  10   1  -4   27.21    1.96 
 -10   1   4   27.56    2.00 
 -10  -1   4   26.59    2.01 
  10  -1  -4   27.21    1.90 
   9   1  -4   50.97    2.53 
   9  -1  -4   53.09    2.52 
  -9  -1   4   52.47    2.65 
  -9   1   4   51.06    2.64 
  -8   1   4    5.45    0.95 
   8   1  -4    4.43    0.89 
  -8  -1   4    5.48    0.97 
   8  -1  -4    3.48    0.77 
  -7  -1   4  217.67    6.74 
  -7   1   4  217.11    6.73 
   7  -1  -4  223.17    6.25 
   7   1  -4  230.35    6.37 
   6   1  -4   34.63    1.70 
  -6  -1   4   35.66    1.80 
  -6   1   4   37.70    1.82 
   6  -1  -4   37.16    1.67 
   5  -1  -4  423.91   10.38 
  -5   1   4  405.37   11.22 
   5   1  -4  419.30   10.46 
  -5  -1   4  409.51   11.26 
  -5   1   4  435.31   10.56 
  -4   1   4   24.13    0.87 
  -4  -1   4   24.71    1.28 
   4  -1  -4   25.91    1.11 
   4   1  -4   25.13    1.15 
  -4   1   4   25.48    1.25 
  -3  -1   4   29.87    1.25 
  -3   1   4   28.76    1.22 
   3   1  -4   29.27    1.15 
  -3   1   4   30.77    0.97 
   3  -1  -4   28.88    1.07 
   2   1  -4   87.10    2.34 
   2  -1  -4   87.30    2.23 
  -2  -1   4   78.99    2.50 
  -2   1   4   83.81    2.51 
  -2   1   4   87.83    2.34 
  -2  -1   4   85.25    2.27 
   1  -1  -4   24.64    0.69 
  -1   1   4   24.48    0.83 
  -1  -1   4   23.87    0.80 
  -1   1   4   23.15    0.86 
   1   1  -4   23.70    0.84 
  -1  -1   4   21.94    0.85 
   0   1   4  820.02   20.17 
   0  -1   4  789.67   20.35 
   0  -1   4  804.09   20.17 
   0   1   4  826.48   19.46 
   1  -1   4  378.79    8.84 
   1   1   4  367.29    8.79 
   1   1   4  371.06    9.41 
   1  -1   4  369.39    9.43 
   2  -1   4   48.46    1.51 
   2  -1   4   46.54    1.52 
  -2  -1  -4   48.38    1.43 
  -2   1  -4   50.20    1.41 
   2   1   4   48.99    1.50 
   2   1   4   46.75    1.50 
   3  -1   4 1133.54   26.49 
  -3  -1  -4 1130.39   28.32 
   3  -1   4 1112.34   28.17 
   3   1   4 1142.14   26.51 
  -3   1  -4 1136.73   28.30 
   3   1   4 1146.96   28.16 
  -4  -1  -4   77.88    2.47 
  -4   1  -4   83.77    2.49 
   4  -1   4   78.69    2.52 
   4   1   4   74.13    2.52 
   4   1   4   80.18    2.34 
  -5   1  -4  728.15   18.60 
  -5  -1  -4  730.42   18.65 
   5   1   4  741.92   18.27 
   5  -1   4  718.73   17.58 
   5   1   4  720.08   17.63 
   6  -1   4   11.85    1.06 
   6   1   4    9.49    0.96 
  -6   1  -4   12.71    0.93 
  -6  -1  -4   12.45    0.95 
  -7  -1  -4   44.05    2.04 
   7   1   4   45.18    2.19 
   7  -1   4   46.76    2.14 
  -7   1  -4   42.76    1.98 
  -8  -1  -4    9.01    0.99 
   8   1   4    7.81    1.07 
   8  -1   4    9.60    1.12 
  -8   1  -4    9.03    1.00 
  -9   1  -4   28.88    1.77 
  -9  -1  -4   26.69    1.76 
   9   1   4   28.23    1.97 
   9  -1   4   26.83    1.89 
  10   1   4   11.08    1.40 
  10  -1   4   11.38    1.40 
  11   1   4   10.37    1.48 
  11  -1   4    8.39    1.38 
 -11   2   4    7.48    1.31 
 -11  -2   4    7.86    1.34 
  11  -2  -4    5.57    1.17 
  11   2  -4    6.52    1.23 
  10  -2  -4    0.68    0.69 
 -10  -2   4    0.45    0.66 
  10   2  -4    0.17    0.69 
 -10   2   4    1.40    0.73 
  -9  -2   4   23.55    1.83 
   9  -2  -4   25.71    1.73 
   9   2  -4   27.32    1.84 
  -9   2   4   24.35    1.84 
  -8   2   4    6.82    1.02 
  -8  -2   4    6.22    1.00 
   8  -2  -4    5.79    0.87 
   8   2  -4    4.57    0.88 
   7  -2  -4   24.65    1.53 
  -7  -2   4   31.40    1.79 
   7   2  -4   30.04    1.66 
  -7   2   4   31.10    1.75 
  -6   2   4   -0.05    0.23 
  -6  -2   4   -0.07    0.44 
   6  -2  -4   -0.20    0.40 
  -6   2   4    0.48    0.48 
   6   2  -4   -0.34    0.44 
  -5   2   4    4.58    0.41 
   5  -2  -4    4.03    0.59 
  -5  -2   4    3.36    0.69 
  -5   2   4    4.31    0.69 
   5   2  -4    4.26    0.62 
  -4   2   4  120.26    3.73 
   4   2  -4  125.10    3.52 
  -4   2   4  121.49    3.33 
   4  -2  -4  114.52    3.31 
  -4  -2   4  123.80    3.78 
   3   2  -4   29.15    1.18 
  -3   2   4   30.37    1.05 
  -3   2   4   28.51    1.23 
   3  -2  -4   29.97    1.05 
  -3  -2   4   28.67    1.25 
   2  -2  -4   24.02    0.80 
  -2   2   4   25.81    0.93 
  -2  -2   4   24.28    1.02 
   2   2  -4   25.31    1.00 
  -1   2   4   19.37    0.78 
   1  -2  -4   18.00    0.56 
  -1   2   4   18.92    0.56 
   1   2  -4   19.29    0.83 
  -1  -2   4   18.06    0.78 
   0   2  -4   -1.00    0.24 
   0   2   4   -0.29    0.16 
   0   2   4   -0.67    0.24 
   1  -2   4  153.03    3.88 
   1   2   4  150.62    4.06 
   1   2   4  151.37    3.78 
   2   2   4  977.03   22.68 
   2  -2   4  963.85   22.70 
   2   2   4  976.68   24.19 
  -3   2  -4   25.10    0.95 
  -3  -2  -4   22.61    0.98 
   3   2   4   23.40    0.92 
   3   2   4   24.43    1.08 
   3  -2   4   23.16    1.06 
   4   2   4  131.00    3.60 
   4   2   4  132.28    3.78 
   4  -2   4  129.13    3.72 
  -4  -2  -4  129.15    3.79 
  -4   2  -4  129.00    3.75 
   5   2   4  100.37    2.86 
  -5   2  -4  100.69    3.13 
  -5  -2  -4  103.38    3.21 
   5  -2   4   96.55    3.13 
   5   2   4   94.26    3.17 
  -6  -2  -4    0.21    0.41 
   6   2   4   -0.01    0.24 
   6   2   4    0.49    0.51 
  -6   2  -4   -0.77    0.32 
   6  -2   4    0.53    0.49 
   7  -2   4  124.87    4.07 
  -7   2  -4  123.66    4.03 
  -7  -2  -4  123.71    4.11 
   7   2   4  120.40    4.13 
   8   2   4    2.67    0.83 
  -8   2  -4    2.73    0.75 
   8  -2   4    2.29    0.77 
  -8  -2  -4    4.02    0.77 
  -9  -2  -4   32.55    1.98 
   9  -2   4   36.00    2.09 
  -9   2  -4   32.95    1.86 
   9   2   4   32.90    2.12 
  10   2   4    0.05    0.71 
  10  -2   4    0.52    0.78 
  11   2   4    1.16    0.90 
  11  -2   4    3.09    0.97 
  11  -3  -4   11.59    1.41 
 -11  -3   4   11.16    1.54 
 -11   3   4   10.60    1.47 
  11   3  -4    9.85    1.49 
  10   3  -4    5.92    1.18 
 -10   3   4    9.49    1.31 
 -10  -3   4    7.00    1.26 
  10  -3  -4    9.46    1.22 
   9   3  -4    6.00    1.08 
   9  -3  -4    6.27    1.01 
  -9  -3   4    4.88    1.07 
  -9   3   4    4.80    1.05 
  -8   3   4    3.93    0.88 
   8   3  -4    3.69    0.88 
   8  -3  -4    3.63    0.80 
  -8  -3   4    4.91    0.95 
   7   3  -4   11.24    1.09 
   7  -3  -4   13.28    1.08 
  -7  -3   4    9.92    1.11 
  -7   3   4   13.55    1.24 
  -6   3   4    1.75    0.35 
   6   3  -4    0.33    0.45 
  -6   3   4    1.08    0.51 
   6  -3  -4   -0.07    0.45 
  -6  -3   4    0.42    0.52 
  -5  -3   4  116.10    3.89 
   5   3  -4  116.33    3.66 
  -5   3   4  118.40    3.41 
  -5   3   4  116.99    3.85 
   5  -3  -4  121.95    3.46 
   4   3  -4   34.69    1.49 
  -4  -3   4   32.49    1.54 
   4  -3  -4   34.22    1.29 
  -4   3   4   34.47    1.56 
  -4   3   4   35.27    1.32 
   3   3  -4   96.75    2.89 
  -3  -3   4  103.24    3.12 
   3  -3  -4   98.13    2.64 
  -3   3   4   95.22    2.87 
   2   3  -4  252.51    6.41 
  -2  -3   4  250.82    6.84 
  -2   3   4  257.46    6.72 
   2  -3  -4  262.10    6.11 
   1   3  -4   21.76    0.93 
  -1   3   4   20.48    0.89 
  -1   3   4   21.30    0.60 
  -1   3   4   21.91    0.60 
   0   3  -4 1059.45   25.51 
   0   3   4 1136.00   25.87 
  -1   3  -4   18.69    0.75 
   1   3   4   16.23    0.75 
  -1   3  -4   18.35    0.76 
   1   3   4   15.54    0.67 
   2   3   4   83.71    2.39 
   2   3   4   85.61    2.47 
   2  -3   4   83.88    2.43 
   3   3   4   89.78    2.71 
   3   3   4   88.54    2.64 
   3  -3   4   95.66    2.74 
   4  -3   4   79.31    2.53 
   4   3   4   75.33    2.33 
   4   3   4   76.99    2.56 
  -4   3  -4   78.84    2.48 
   5   3   4  146.78    4.44 
  -5  -3  -4  152.82    4.52 
  -5   3  -4  152.38    4.46 
   5   3   4  152.68    4.17 
   5  -3   4  151.66    4.39 
   6   3   4   16.88    1.27 
  -6  -3  -4   15.96    1.16 
   6   3   4   17.74    0.87 
   6  -3   4   13.81    1.13 
  -6   3  -4   15.55    1.10 
   7  -3   4   31.33    1.70 
  -7   3  -4   30.15    1.62 
   7   3   4   30.25    1.75 
  -7  -3  -4   33.91    1.73 
   8  -3   4   11.02    1.19 
   8   3   4    8.75    1.19 
  -8   3  -4    9.33    1.06 
  -8  -3  -4   10.76    1.13 
   9  -3   4    4.77    0.97 
  -9  -3  -4    4.16    0.89 
   9   3   4    3.86    0.94 
  -9   3  -4    4.01    0.82 
  10  -3   4    9.81    1.36 
  10   3   4   11.78    1.48 
  11  -3   4    1.22    0.82 
  11   3   4    1.69    0.91 
 -11  -4   4    0.85    0.83 
 -11   4   4    3.96    0.97 
  11   4  -4    0.34    0.74 
  11  -4  -4    0.25    0.70 
  10  -4  -4    2.96    0.90 
 -10   4   4    4.71    1.04 
  10   4  -4    3.38    0.97 
 -10  -4   4    4.04    1.12 
   9  -4  -4   27.35    1.77 
  -9  -4   4   33.29    2.18 
  -9   4   4   29.85    2.02 
   9   4  -4   30.87    2.04 
  -8   4   4    1.27    0.70 
   8   4  -4    1.16    0.70 
  -8  -4   4    1.34    0.75 
   8  -4  -4   -0.04    0.56 
   7  -4  -4  139.35    4.25 
  -7   4   4  139.60    4.77 
   7   4  -4  135.05    4.49 
  -7  -4   4  141.22    4.81 
   6  -4  -4    8.25    0.82 
   6   4  -4    7.00    0.91 
  -6   4   4    8.58    0.76 
  -6   4   4   10.37    1.04 
  -6  -4   4    9.32    1.02 
   5   4  -4  209.29    5.91 
  -5   4   4  211.79    5.85 
  -5  -4   4  218.49    6.36 
   5  -4  -4  213.18    5.59 
  -5   4   4  210.06    6.26 
  -4   4   4    2.04    0.43 
  -4   4   4    2.62    0.54 
  -4  -4   4    1.32    0.46 
   4  -4  -4    2.03    0.39 
   4   4  -4    1.94    0.27 
   4   4  -4    2.11    0.50 
  -3   4   4    5.51    0.52 
   3   4  -4    6.48    0.62 
   3  -4  -4    6.38    0.48 
   2  -4  -4  572.45   13.01 
   2   4  -4  541.01   13.33 
  -2   4   4  553.24   14.18 
  -1   4   4   18.35    0.63 
   1   4  -4   18.53    0.92 
  -1   4   4   18.10    0.91 
   0   4   4  274.72    6.53 
   0   4   4  272.99    7.25 
   0   4  -4  269.95    6.80 
   1   4   4  123.05    3.20 
  -1   4  -4  124.10    3.32 
   1   4   4  124.28    3.55 
  -1   4  -4  122.36    3.25 
   2   4   4  896.92   21.06 
   2   4   4  905.55   22.51 
   2  -4   4  893.43   21.11 
   3   4   4  150.59    4.16 
   3  -4   4  149.18    4.08 
   3   4   4  148.26    4.10 
   4   4   4  110.72    3.19 
   4   4   4  109.26    3.37 
   4  -4   4  108.95    3.29 
  -5   4  -4  321.19    8.78 
   5  -4   4  322.67    8.39 
   5   4   4  325.10    8.52 
   5   4   4  330.15    8.47 
   6   4   4    0.60    0.30 
   6  -4   4    0.06    0.49 
   6   4   4    0.09    0.48 
   7  -4   4   89.67    3.20 
   7   4   4   82.53    3.24 
  -7   4  -4   87.11    3.16 
   8   4   4   -0.05    0.59 
   8  -4   4    0.27    0.62 
  -8   4  -4    0.21    0.52 
  -9   4  -4   12.16    1.19 
   9   4   4   10.63    1.37 
   9  -4   4    9.10    1.21 
  10  -4   4    6.82    1.19 
  10   4   4    4.76    1.13 
  11  -4   4    0.19    0.76 
  11   4   4   -0.25    0.75 
 -11  -5   4   13.75    1.74 
  11   5  -4   12.15    1.63 
 -11   5   4   16.41    1.72 
  10   5  -4    0.51    0.74 
  10  -5  -4   -0.17    0.63 
 -10  -5   4    2.00    0.90 
 -10   5   4   -0.16    0.70 
   9   5  -4   32.67    2.10 
  -9   5   4   31.88    2.10 
   9  -5  -4   36.20    1.99 
  -9  -5   4   36.01    2.26 
   8  -5  -4   -0.06    0.58 
   8   5  -4    0.43    0.66 
  -8   5   4    0.51    0.61 
  -8  -5   4   -0.05    0.64 
  -7  -5   4   28.35    1.79 
   7   5  -4   26.95    1.76 
  -7   5   4   28.79    1.81 
   7  -5  -4   29.44    1.55 
  -6   5   4   36.02    1.90 
  -6   5   4   34.40    1.61 
   6   5  -4   35.57    1.88 
  -6  -5   4   35.56    1.93 
   6  -5  -4   33.77    1.57 
  -5   5   4   11.32    1.01 
   5   5  -4    8.94    0.61 
   5  -5  -4   12.48    0.87 
  -5   5   4    9.58    0.82 
   5   5  -4    8.99    0.92 
  -5  -5   4   10.72    1.06 
   4   5  -4  228.28    6.20 
   4  -5  -4  229.66    5.78 
   4   5  -4  230.39    6.04 
  -4   5   4  222.39    6.32 
   3  -5  -4   31.76    1.10 
  -3   5   4   31.42    1.39 
   3   5  -4   31.30    1.41 
  -2   5   4  473.16   12.26 
  -2   5   4  464.81   10.87 
  -2   5   4  476.78   11.09 
   2   5  -4  473.70   11.54 
  -1   5   4    6.48    0.60 
  -1   5   4    6.89    0.41 
   1   5  -4    6.09    0.60 
   0   5   4  124.84    3.18 
   0   5   4  128.15    3.71 
   0   5  -4  119.83    3.46 
  -1   5  -4  142.89    3.89 
   1   5   4  145.85    4.19 
   1   5   4  147.89    3.77 
   2   5   4  142.43    3.89 
  -2   5  -4  143.22    3.90 
  -2   5  -4  144.37    3.82 
   2   5   4  149.87    4.18 
   3   5   4  263.63    7.03 
   3   5   4  255.94    6.74 
   3  -5   4  267.52    6.75 
   4   5   4   57.06    1.97 
   4  -5   4   59.87    2.12 
   4   5   4   59.12    2.18 
   5   5   4   26.29    1.51 
  -5   5  -4   25.61    1.35 
   5  -5   4   28.17    1.42 
   5   5   4   27.84    1.20 
  -6   5  -4   10.23    0.90 
   6   5   4    9.73    0.68 
   6  -5   4    9.20    0.95 
   6   5   4   10.38    1.08 
   7   5   4    2.59    0.74 
  -7   5  -4    2.42    0.65 
   7  -5   4    2.45    0.69 
   8   5   4    2.50    0.94 
  -8   5  -4    5.08    0.83 
   8  -5   4    3.13    0.80 
   9  -5   4   18.81    1.58 
  -9   5  -4   17.75    1.45 
   9   5   4   17.86    1.69 
  10  -5   4    4.53    1.05 
  10   5   4    3.91    1.06 
  11  -5   4   11.09    1.49 
  11   5   4    8.42    1.47 
  11   6  -4    0.11    0.82 
 -11   6   4    2.67    0.90 
  10   6  -4    0.94    0.76 
 -10   6   4    0.53    0.81 
   9   6  -4    1.47    0.77 
  -9   6   4    2.60    0.76 
   9  -6  -4    0.00    0.60 
  -8   6   4    3.22    0.95 
   8  -6  -4    1.97    0.72 
   8   6  -4    3.07    0.84 
   7  -6  -4   10.51    1.01 
   7   6  -4    9.81    1.17 
  -7   6   4   10.47    1.17 
  -6   6   4    1.96    0.57 
   6  -6  -4    2.25    0.57 
  -6   6   4    3.50    0.76 
   6   6  -4    2.06    0.70 
   5  -6  -4  117.72    3.36 
  -5   6   4  115.15    3.69 
   5   6  -4  118.49    3.32 
   5   6  -4  105.72    3.71 
   4   6  -4   27.73    1.22 
   4  -6  -4   27.09    1.15 
  -4   6   4   25.51    1.42 
   4   6  -4   29.18    1.52 
   3   6  -4   65.53    2.44 
  -3   6   4   67.89    2.46 
   3  -6  -4   71.29    2.02 
   2   6  -4  226.09    5.93 
  -2   6   4  218.55    5.40 
  -2   6   4  220.47    6.26 
  -1   6   4    0.14    0.29 
  -1   6   4    0.01    0.21 
   1   6  -4    0.41    0.37 
   0   6   4  174.79    4.99 
   0   6  -4  170.62    4.65 
   0   6   4  174.57    4.35 
  -1   6  -4   22.69    1.04 
   1   6   4   22.39    0.97 
   1   6   4   23.55    1.15 
   2   6   4   22.04    1.12 
   2   6   4   23.06    1.07 
  -2   6  -4   22.45    1.02 
  -2   6  -4   22.88    1.05 
   3  -6   4    3.88    0.54 
   3   6   4    4.86    0.54 
   3   6   4    4.81    0.60 
   4   6   4    1.61    0.38 
   4  -6   4    2.10    0.49 
   4   6   4    1.60    0.52 
   5  -6   4   86.76    2.90 
   5   6   4   89.54    2.77 
   5   6   4   79.07    2.96 
   6  -6   4    0.19    0.42 
   6   6   4    0.65    0.35 
  -6   6  -4    1.10    0.49 
   6   6   4    0.68    0.59 
   7   6   4   59.96    2.74 
  -7   6  -4   57.17    2.48 
   7  -6   4   53.51    2.43 
  -8   6  -4    0.72    0.53 
   8   6   4   -0.19    0.58 
   8  -6   4   -0.10    0.53 
   9   6   4   22.71    1.92 
  -9   6  -4   20.11    1.60 
   9  -6   4   21.01    1.66 
  10   6   4   -0.62    0.61 
  10  -6   4    0.06    0.62 
  11  -6   4    0.98    0.88 
  11   6   4   -0.28    0.81 
  11   7  -4    2.29    0.99 
 -11   7   4    2.80    0.99 
  10   7  -4    7.14    1.31 
 -10   7   4    8.38    1.37 
   9   7  -4    0.32    0.70 
  -9   7   4    1.01    0.64 
   8  -7  -4    3.93    0.79 
   8   7  -4    4.28    1.01 
  -8   7   4    3.71    0.96 
  -7   7   4   24.19    1.49 
   7  -7  -4   26.89    1.50 
  -7   7   4   21.61    1.65 
   7   7  -4   22.16    1.73 
  -6   7   4    2.74    0.74 
  -6   7   4    0.83    0.64 
   6  -7  -4    3.04    0.61 
   6   7  -4    2.92    0.80 
   5   7  -4   39.91    1.57 
   5  -7  -4   39.79    1.59 
  -5   7   4   38.10    1.82 
   5   7  -4   37.52    1.91 
   4   7  -4   25.75    1.52 
   4   7  -4   28.08    1.28 
  -4   7   4   25.41    1.46 
   4  -7  -4   28.95    1.19 
  -3   7   4   17.10    0.78 
   3   7  -4   14.22    1.05 
  -3   7   4   16.01    0.75 
  -3   7   4   13.19    1.05 
   3   7  -4   12.39    0.90 
  -2   7   4  179.79    5.30 
   2   7  -4  175.54    4.97 
  -2   7   4  178.82    4.48 
   1   7  -4   19.12    1.12 
  -1   7   4   16.80    0.77 
  -1   7   4   18.95    1.14 
   0   7   4  212.91    6.03 
   0   7   4  210.25    5.27 
   0   7  -4  206.78    5.56 
   1   7   4   11.87    0.89 
   1   7   4   12.55    0.75 
  -1   7  -4   11.68    0.81 
   2   7   4   96.06    2.91 
  -2   7  -4   96.18    2.92 
   2   7   4   98.37    3.19 
  -2   7  -4   97.40    2.88 
  -3   7  -4   50.20    1.85 
  -3   7  -4   54.39    1.93 
   3   7   4   49.35    1.97 
   3   7   4   48.06    1.99 
   4   7   4    3.66    0.56 
   4   7   4    5.04    0.73 
   4  -7   4    4.03    0.63 
   5  -7   4   56.55    2.23 
   5   7   4   53.68    2.08 
   5   7   4   52.69    2.32 
   6   7   4    1.18    0.60 
   6  -7   4    0.07    0.44 
  -6   7  -4   -0.23    0.39 
  -7   7  -4   31.23    1.76 
   7   7   4   31.88    1.98 
   7  -7   4   29.37    1.74 
   8   7   4    4.14    0.96 
   8  -7   4    5.83    0.94 
  -8   7  -4    6.05    0.92 
   9   7   4    0.77    0.75 
   9  -7   4    1.00    0.71 
  10   7   4    2.95    1.03 
  10  -7   4    4.42    1.00 
  11   7   4    0.01    0.82 
  11  -7   4    0.73    0.83 
 -10   8   4    5.15    1.12 
  10   8  -4    2.53    1.01 
   9   8  -4   40.25    2.57 
  -9   8   4   47.48    2.70 
  -8   8   4    5.75    1.09 
   8   8  -4    5.30    1.14 
   7   8  -4  188.58    6.12 
  -7   8   4  186.74    5.94 
  -7   8   4  188.64    6.38 
   7  -8  -4  204.89    5.56 
   6   8  -4   10.15    1.15 
  -6   8   4    9.00    0.98 
   6  -8  -4   10.07    0.89 
   5   8  -4   65.98    2.79 
  -5   8   4   69.28    2.80 
   5   8  -4   71.85    2.48 
   5  -8  -4   71.75    2.36 
   4   8  -4   31.77    1.47 
  -4   8   4   27.44    1.60 
   4   8  -4   28.55    1.63 
   3   8  -4   -0.22    0.35 
  -3   8   4   -0.31    0.44 
   3   8  -4    0.05    0.44 
  -3   8   4    0.38    0.30 
  -2   8   4   17.08    1.23 
   2   8  -4   16.91    1.18 
  -2   8   4   18.31    0.86 
   1   8  -4    0.97    0.47 
  -1   8   4   -0.07    0.24 
  -1   8   4   -0.12    0.32 
   0   8  -4  394.64    9.72 
   0   8   4  379.03    9.37 
   0   8   4  385.30   10.47 
   1   8   4  111.28    3.16 
  -1   8  -4  105.81    3.29 
   1   8   4  112.32    3.65 
   2   8   4  767.84   19.60 
  -2   8  -4  753.61   18.18 
   2   8   4  759.72   18.17 
  -3   8  -4  188.27    5.10 
   3   8   4  195.64    5.34 
  -3   8  -4  189.35    5.21 
   3   8   4  191.68    5.63 
   4   8   4  154.08    4.64 
   4   8   4  149.46    4.56 
   5   8   4   34.24    1.60 
   5   8   4   35.49    1.81 
   5  -8   4   32.55    1.67 
   6  -8   4    0.22    0.47 
   6   8   4   -0.17    0.48 
  -7   8  -4    6.78    0.99 
   7  -8   4    5.60    0.93 
   7   8   4    4.91    0.99 
  -8   8  -4    0.49    0.58 
   8  -8   4    1.44    0.66 
   8   8   4   -0.02    0.64 
   9   8   4    0.54    0.81 
   9  -8   4    1.38    0.72 
  10   8   4   11.17    1.66 
  10  -8   4   12.13    1.40 
  10   9  -4    2.74    1.04 
 -10   9   4    3.96    1.06 
  -9   9   4    8.54    1.41 
   9   9  -4    9.19    1.43 
  -8   9   4    0.35    0.64 
   8   9  -4   -0.38    0.68 
   7   9  -4   21.46    1.73 
  -7   9   4   21.70    1.76 
  -7   9   4   22.91    1.63 
  -6   9   4   13.40    1.21 
   6   9  -4   15.58    1.47 
   6  -9  -4   14.35    1.07 
   5   9  -4  135.67    4.59 
   5   9  -4  147.24    4.35 
  -5   9   4  135.60    4.66 
  -4   9   4  173.93    5.44 
  -4   9   4  173.95    4.54 
   4   9  -4  168.61    5.13 
  -4   9   4  164.15    4.42 
   4   9  -4  169.79    5.21 
  -3   9   4  239.30    7.19 
   3   9  -4  249.24    6.81 
  -3   9   4  243.46    6.13 
   3   9  -4  241.16    6.96 
  -2   9   4  914.31   21.66 
  -2   9   4  935.54   23.89 
   2   9  -4  923.98   22.25 
  -1   9   4   38.84    1.44 
   1   9  -4   40.66    1.79 
  -1   9   4   38.73    1.91 
   0   9   4  520.66   14.04 
   0   9   4  529.22   12.69 
   0   9  -4  531.08   13.01 
  -1   9  -4    6.44    0.71 
   1   9   4    5.40    0.78 
   1   9   4    8.17    0.68 
   2   9   4    5.28    0.72 
  -2   9  -4    5.23    0.65 
   2   9   4    5.75    0.67 
  -3   9  -4    4.83    0.64 
   3   9   4    5.42    0.73 
   3   9   4    4.85    0.70 
  -3   9  -4    4.75    0.64 
   4   9   4   28.37    1.52 
  -4   9  -4   26.67    1.36 
   4   9   4   24.08    1.50 
  -4   9  -4   28.80    1.44 
   5   9   4   46.97    2.02 
   5   9   4   43.29    2.12 
   6   9   4    6.38    1.02 
   6  -9   4    6.98    0.94 
   7  -9   4   51.24    2.38 
   7   9   4   50.60    2.63 
  -7   9  -4   53.42    2.55 
   8   9   4   15.47    1.64 
  -8   9  -4   17.41    1.56 
   8  -9   4   17.64    1.50 
   9  -9   4   10.73    1.28 
   9   9   4    9.05    1.47 
  10  -9   4   23.79    1.83 
  10   9   4   18.00    1.99 
  10  10  -4    0.65    0.76 
 -10  10   4    1.85    0.90 
  -9  10   4   42.30    2.71 
   9  10  -4   43.83    2.79 
  -8  10   4    0.74    0.70 
   8  10  -4   -0.64    0.76 
  -7  10   4  141.13    4.87 
   7  10  -4  131.22    4.90 
  -7  10   4  133.89    5.11 
   6  10  -4   22.54    1.74 
  -6  10   4   24.93    1.70 
  -5  10   4   16.06    1.41 
   5  10  -4   20.44    1.51 
   5  10  -4   20.90    1.29 
   4  10  -4   58.86    2.41 
  -4  10   4   57.58    1.99 
  -4  10   4   59.17    2.65 
   4  10  -4   59.17    2.59 
  -3  10   4   10.38    1.13 
  -3  10   4   11.95    0.81 
   3  10  -4   10.51    1.01 
   3  10  -4   12.68    1.11 
  -2  10   4    9.02    1.02 
   2  10  -4   10.31    0.99 
  -2  10   4    8.02    0.70 
   2  10  -4    8.12    0.88 
  -1  10   4   20.20    1.01 
   1  10  -4   18.61    1.26 
  -1  10   4   19.41    1.34 
   0  10   4  254.10    7.45 
   0  10  -4  253.42    6.80 
   0  10   4  249.08    6.49 
  -1  10  -4   14.39    1.05 
   1  10   4   13.91    1.18 
   1  10   4   13.51    0.96 
   2  10   4  369.09   10.41 
   2  10   4  370.77    9.55 
  -2  10  -4  386.50    9.61 
   3  10   4   76.85    3.00 
   3  10   4   81.86    2.88 
  -3  10  -4   78.49    2.72 
  -4  10  -4   61.23    2.27 
   4  10   4   59.37    2.52 
  -4  10  -4   57.32    2.28 
   4  10   4   59.21    2.50 
  -5  10  -4    7.39    0.86 
  -5  10  -4    4.87    0.73 
   5  10   4    6.50    0.97 
   6  10   4    5.37    1.01 
   7  10   4    1.28    0.77 
   7 -10   4    0.61    0.62 
  -8  10  -4    4.57    1.00 
   8 -10   4    3.63    0.88 
   8  10   4    3.89    1.05 
   9 -10   4    2.43    0.81 
   9  10   4    0.24    0.79 
  10  10   4    4.97    1.32 
   9  11  -4    0.09    0.92 
  -9  11   4    0.71    0.84 
   8  11  -4    0.10    0.85 
  -8  11   4    0.76    0.70 
  -7  11   4   49.27    2.60 
   7  11  -4   48.00    2.73 
   6  11  -4    0.21    0.78 
  -6  11   4   -1.11    0.68 
   5  11  -4   86.72    3.57 
  -5  11   4   98.04    3.78 
   5  11  -4   92.74    3.35 
   4  11  -4    6.46    0.88 
   4  11  -4    7.06    1.07 
  -4  11   4    4.67    0.97 
   3  11  -4  109.91    3.83 
   3  11  -4  110.46    3.89 
  -3  11   4  109.20    3.23 
  -3  11   4  114.89    4.17 
   2  11  -4  104.60    4.07 
  -2  11   4  128.64    3.51 
   2  11  -4  124.27    4.00 
  -2  11   4  132.71    4.47 
   1  11  -4    9.25    0.93 
  -1  11   4    8.22    0.70 
  -1  11   4    8.88    1.05 
   0  11  -4  124.80    3.90 
   0  11   4  125.28    4.36 
   0  11   4  122.52    3.62 
   1  11   4    4.91    0.68 
  -1  11  -4    4.25    0.71 
   1  11   4    3.70    0.76 
   2  11   4    2.11    0.60 
   2  11   4    2.04    0.67 
  -2  11  -4    1.91    0.62 
   3  11   4   31.43    1.79 
   3  11   4   33.05    1.73 
  -3  11  -4   29.64    1.57 
   4  11   4    6.72    0.93 
  -4  11  -4    5.18    0.76 
   4  11   4    4.68    0.85 
   5  11   4   51.35    2.46 
  -5  11  -4   49.78    2.13 
  -5  11  -4   55.93    2.26 
   5  11   4   49.75    2.36 
  -6  11  -4    0.99    0.62 
  -6  11  -4    1.03    0.63 
   6  11   4    0.46    0.70 
  -7  11  -4   18.62    1.63 
  -7  11  -4   17.52    1.39 
   7  11   4   18.66    1.72 
  -7  11  -4   19.07    1.38 
  -8  11  -4   10.25    1.35 
   8 -11   4    9.27    1.21 
   8  11   4    8.44    1.36 
   9  11   4    1.05    0.87 
   9  12  -4    3.64    1.26 
  -9  12   4    4.17    1.18 
   8  12  -4   -0.47    0.82 
  -8  12   4    0.64    0.69 
  -7  12   4    3.87    0.95 
   7  12  -4    2.41    0.92 
  -6  12   4    3.66    1.01 
   6  12  -4    4.87    1.13 
   5  12  -4   19.96    1.49 
   5  12  -4   19.74    1.66 
  -5  12   4   18.58    1.61 
  -4  12   4   58.54    2.86 
   4  12  -4   61.32    2.65 
   4  12  -4   59.29    2.75 
   3  12  -4   59.51    2.67 
   3  12  -4   58.59    2.69 
  -3  12   4   66.78    3.00 
   2  12  -4   87.49    3.21 
   2  12  -4   87.78    3.42 
  -2  12   4   81.76    3.48 
  -2  12   4   85.94    2.72 
   1  12  -4   24.20    1.48 
  -1  12   4   19.40    1.17 
   1  12  -4   20.97    1.53 
  -1  12   4   17.92    1.49 
   0  12  -4   22.26    1.41 
   0  12   4   22.41    1.29 
   0  12   4   24.30    1.72 
   1  12   4    0.94    0.47 
   1  12   4   -0.48    0.42 
  -1  12  -4    0.61    0.47 
  -2  12  -4    1.32    0.55 
   2  12   4    1.92    0.69 
   2  12   4    1.48    0.55 
   3  12   4   -0.43    0.47 
   3  12   4   -0.14    0.42 
  -3  12  -4    0.30    0.45 
   4  12   4    1.61    0.70 
  -4  12  -4    1.65    0.61 
   4  12   4    1.01    0.59 
   5  12   4   74.71    3.18 
  -5  12  -4   78.10    2.95 
   5  12   4   77.80    3.20 
  -6  12  -4   14.38    1.23 
   6  12   4   11.97    1.42 
  -6  12  -4   10.53    1.33 
  -6  12  -4   12.62    1.19 
  -7  12  -4   49.07    2.36 
   7  12   4   41.04    2.56 
  -7  12  -4   49.79    2.29 
  -7  12  -4   44.13    2.63 
  -8  12  -4    9.13    1.32 
   8  12   4    7.73    1.37 
   9  12   4   14.82    1.81 
  -9  13   4   13.14    1.80 
   9  13  -4   14.00    1.91 
  -8  13   4    0.76    0.74 
   8  13  -4    1.04    1.01 
  -7  13   4   27.60    2.03 
   7  13  -4   23.79    2.09 
   6  13  -4   10.58    1.42 
  -6  13   4    6.87    1.26 
  -5  13   4   14.39    1.54 
   5  13  -4   15.67    1.55 
   4  13  -4   26.49    1.71 
   4  13  -4   24.74    1.78 
  -4  13   4   28.38    2.02 
   3  13  -4    0.20    0.46 
   3  13  -4    1.59    0.72 
  -3  13   4    0.22    0.61 
  -2  13   4    1.03    0.62 
   2  13  -4    0.16    0.46 
   2  13  -4   -0.77    0.48 
  -1  13   4    1.13    0.63 
   1  13  -4    2.30    0.68 
  -1  13   4    2.90    0.55 
   1  13  -4    0.89    0.64 
   0  13  -4   37.22    2.16 
   0  13   4   42.97    2.35 
   0  13   4   41.66    1.80 
   0  13  -4   45.86    2.07 
   1  13   4   25.96    1.75 
   1  13   4   23.31    1.38 
  -1  13  -4   24.55    1.51 
  -1  13  -4   24.76    1.75 
  -2  13  -4   55.55    2.30 
   2  13   4   46.31    2.17 
   2  13   4   53.10    2.61 
   3  13   4   46.93    2.45 
   3  13   4   47.21    2.26 
  -3  13  -4   49.80    2.19 
   4  13   4   10.64    1.24 
   4  13   4   10.39    1.23 
  -4  13  -4   11.81    1.12 
   5  13   4   32.46    2.04 
  -5  13  -4   29.56    1.77 
   5  13   4   29.70    1.94 
  -5  13  -4   26.15    1.95 
  -6  13  -4    0.55    0.68 
  -6  13  -4    1.22    0.72 
   6  13   4   -0.43    0.69 
  -7  13  -4    1.30    0.76 
   7  13   4    0.39    0.78 
   8  13   4    1.02    0.85 
  -8  13  -4    1.16    0.70 
   9  13   4    9.80    1.56 
  -8  14   4    1.99    0.91 
   8  14  -4    1.23    1.00 
   7  14  -4   10.55    1.62 
  -7  14   4   12.65    1.62 
   6  14  -4    1.21    0.92 
  -6  14   4    2.17    0.91 
   5  14  -4   30.65    2.19 
  -5  14   4   37.42    2.43 
   4  14  -4    9.01    1.15 
   4  14  -4   10.98    1.35 
  -4  14   4    9.60    1.34 
  -3  14   4   22.81    1.90 
   3  14  -4   22.20    1.67 
   3  14  -4   20.79    1.62 
  -2  14   4   66.78    3.21 
   2  14  -4   65.81    2.84 
   2  14  -4   67.89    3.08 
  -1  14   4    0.24    0.68 
   1  14  -4    0.30    0.57 
   1  14  -4    0.34    0.58 
   0  14  -4   79.88    3.06 
   0  14  -4   79.78    3.47 
   0  14   4   86.35    2.87 
   0  14   4   77.01    3.50 
   1  14   4    7.04    1.13 
  -1  14  -4    5.66    1.04 
  -1  14  -4    6.95    0.97 
   1  14   4    4.92    0.81 
   2  14   4   23.42    1.76 
  -2  14  -4   26.13    1.62 
   2  14   4   26.64    1.63 
  -2  14  -4   24.89    1.90 
   3  14   4    0.53    0.61 
  -3  14  -4    0.58    0.58 
   3  14   4    0.77    0.64 
  -3  14  -4   -0.50    0.59 
   4  14   4    1.42    0.72 
  -4  14  -4    0.42    0.65 
   4  14   4    0.53    0.64 
  -4  14  -4    1.34    0.67 
   5  14   4   30.02    1.98 
  -5  14  -4   27.12    2.05 
   5  14   4   29.66    2.01 
  -6  14  -4    0.00    0.60 
   6  14   4    0.32    0.66 
   7  14   4   20.48    1.91 
  -7  14  -4   24.47    1.99 
   8  14   4   -0.77    0.74 
  -7  15   4    0.05    0.75 
   7  15  -4   -0.31    0.84 
   6  15  -4    0.05    0.80 
  -6  15   4    1.05    0.80 
   5  15  -4    3.45    1.07 
  -5  15   4    3.83    1.11 
   4  15  -4   20.05    1.74 
  -4  15   4   17.94    1.78 
   4  15  -4   21.78    1.75 
   3  15  -4    8.35    1.18 
  -3  15   4    8.31    1.31 
   3  15  -4    7.97    1.15 
   2  15  -4   20.23    1.65 
  -2  15   4   21.10    1.87 
   2  15  -4   19.04    1.71 
  -1  15   4    2.66    0.97 
   1  15  -4    3.23    0.83 
   1  15  -4    3.63    0.93 
   0  15   4    4.79    1.14 
   0  15  -4    3.43    1.02 
   0  15  -4    6.81    0.97 
  -1  15  -4    1.12    0.64 
  -1  15  -4    0.95    0.60 
   1  15   4   -0.29    0.70 
   2  15   4    0.89    0.62 
  -2  15  -4    1.09    0.60 
  -2  15  -4   -0.06    0.57 
   2  15   4    0.45    0.62 
  -3  15  -4    5.53    1.11 
  -3  15  -4    4.86    0.85 
   3  15   4    3.25    0.90 
   3  15   4    4.60    0.91 
  -4  15  -4    2.92    0.98 
   4  15   4    4.56    0.99 
   4  15   4    4.00    0.98 
  -5  15  -4    4.09    1.01 
   5  15   4    3.86    1.01 
   5  15   4    3.37    0.98 
   6  15   4   -1.06    0.70 
  -6  15  -4   -0.36    0.79 
  -7  15  -4    0.07    0.68 
   7  15   4    0.52    0.88 
   7  16  -4   -0.03    0.91 
  -7  16   4   -0.29    0.89 
  -6  16   4    7.48    1.44 
   6  16  -4    6.26    1.38 
  -5  16   4    1.15    0.99 
   5  16  -4    4.01    1.07 
   4  16  -4   11.86    1.44 
  -4  16   4   11.53    1.56 
   4  16  -4   12.14    1.38 
   3  16  -4    6.07    1.06 
  -3  16   4    3.96    1.14 
   3  16  -4    4.91    0.99 
   2  16  -4    9.48    1.19 
   2  16  -4   10.17    1.34 
  -2  16   4    8.83    1.36 
   1  16  -4    9.59    1.30 
  -1  16   4    9.54    1.35 
   1  16  -4    6.86    1.05 
   0  16   4    4.28    1.06 
   0  16  -4    2.36    0.83 
   0  16  -4    3.35    0.95 
  -1  16  -4    5.00    0.96 
  -1  16  -4    4.90    1.08 
   1  16   4    4.07    1.04 
  -2  16  -4   -0.97    0.62 
   2  16   4    1.05    0.79 
  -2  16  -4    0.80    0.65 
   3  16   4    1.82    0.84 
  -3  16  -4    3.11    1.00 
   3  16   4    3.69    0.91 
   4  16   4    1.38    0.81 
   4  16   4    1.15    0.86 
  -4  16  -4    1.86    0.96 
   5  16   4    3.54    1.04 
  -5  16  -4    0.68    0.83 
   6  16   4    2.35    1.00 
  -6  16  -4    1.66    0.94 
  -7  16  -4    3.50    1.10 
   7  16   4    2.34    1.04 
  -6  17   4    0.57    1.01 
   6  17  -4    1.42    1.08 
  -5  17   4   14.87    1.81 
   5  17  -4   12.93    1.61 
   4  17  -4    1.00    0.74 
   4  17  -4    0.55    0.78 
  -4  17   4    0.06    0.83 
   3  17  -4    3.45    0.95 
  -3  17   4    1.67    0.96 
   3  17  -4    4.21    1.03 
  -2  17   4    0.60    0.74 
   2  17  -4    0.55    0.67 
   2  17  -4   -0.95    0.57 
  -1  17   4   -0.46    0.58 
   1  17  -4    0.20    0.62 
   1  17  -4   -0.42    0.66 
   0  17   4   13.69    1.61 
   0  17  -4   13.58    1.60 
   0  17  -4   14.44    1.37 
  -1  17  -4    7.10    1.06 
  -1  17  -4    6.03    1.22 
   1  17   4    7.88    1.34 
  -2  17  -4    9.18    1.42 
   2  17   4    7.63    1.29 
   3  17   4   18.96    1.79 
  -3  17  -4   18.36    1.87 
  -4  17  -4    0.44    0.77 
   4  17   4   -0.19    0.72 
  -5  17  -4   10.43    1.54 
   5  17   4    8.90    1.35 
  -6  17  -4    1.17    0.93 
   6  17   4    0.73    0.91 
  -5  18   4   10.28    1.62 
   5  18  -4    7.84    1.45 
   4  18  -4   14.43    1.56 
  -4  18   4   11.48    1.69 
   4  18  -4   12.32    1.56 
   3  18  -4    7.26    1.24 
  -3  18   4    8.04    1.48 
   3  18  -4    9.41    1.39 
  -2  18   4   28.03    2.25 
   2  18  -4   23.94    2.00 
   2  18  -4   27.20    1.92 
   1  18  -4    1.01    0.75 
   1  18  -4    0.25    0.71 
  -1  18   4    0.71    0.76 
   0  18   4   14.74    1.74 
   0  18  -4   13.64    1.64 
   1  18   4    0.97    0.79 
  -1  18  -4    1.01    0.78 
  -2  18  -4    0.11    0.70 
   2  18   4    0.38    0.68 
   3  18   4    0.94    0.74 
  -3  18  -4    0.16    0.74 
  -4  18  -4    0.57    0.88 
   4  18   4    0.80    0.75 
  -5  18  -4   16.47    1.90 
  -4  19   4   -0.06    0.74 
   4  19  -4    2.67    0.95 
  -3  19   4   -0.28    0.65 
   3  19  -4   -0.98    0.59 
   3  19  -4   -1.07    0.70 
  -2  19   4    3.19    1.12 
   2  19  -4    2.47    0.97 
  -1  19   4    0.55    0.74 
   1  19  -4   -0.07    0.79 
   0  19  -4   17.05    1.85 
   0  19   4   19.91    2.00 
   1  19   4    3.03    1.11 
  -1  19  -4    0.54    0.91 
   2  19   4   13.74    1.72 
  -2  19  -4   11.39    1.67 
   3  19   4   24.86    2.18 
  -3  19  -4   21.49    2.12 
   1  20  -4    2.23    1.00 
  -1  20   4    1.18    0.95 
   0  20  -4   -0.16    0.77 
   0  20   4    0.17    0.86 
   1  20   4    8.13    1.53 
  -1  20  -4    7.83    1.45 
  11   0  -5    0.53    0.70 
 -11   0   5   -1.12    0.56 
  10   0  -5   -0.38    0.63 
 -10   0   5   -0.18    0.62 
   9   0  -5   -0.63    0.57 
  -9   0   5   -0.16    0.58 
  -8   0   5   -0.07    0.53 
   8   0  -5    0.57    0.53 
   7   0  -5   -0.15    0.45 
  -7   0   5    0.65    0.56 
  -6   0   5   -0.29    0.41 
   6   0  -5    0.12    0.42 
  -5   0   5    1.12    0.51 
   5   0  -5    0.31    0.45 
  -4   0   5    0.46    0.34 
   4   0  -5    0.23    0.28 
   3   0  -5   -0.14    0.25 
  -3   0   5   -0.06    0.16 
   2   0  -5    0.31    0.18 
  -2   0   5    0.99    0.25 
  -2   0   5    0.04    0.13 
   1   0  -5    1.41    0.19 
  -1   0   5    0.06    0.12 
   0   0   5    0.32    0.09 
   0   0  -5    0.06    0.09 
   0   0   5    0.13    0.11 
   0   0  -5    0.14    0.10 
   1   0   5   -0.03    0.16 
   1   0   5   -0.15    0.15 
   2   0   5   -0.95    0.16 
   2   0   5   -0.81    0.20 
  -2   0  -5   -0.65    0.12 
   3   0   5   -0.18    0.22 
   3   0   5   -0.45    0.26 
  -3   0  -5   -0.30    0.18 
   4   0   5   -0.26    0.28 
  -4   0  -5    0.07    0.20 
   4   0   5    0.19    0.20 
  -5   0  -5    0.44    0.35 
   5   0   5    0.16    0.27 
   5   0   5   -0.02    0.49 
  -6   0  -5   -0.14    0.33 
   6   0   5   -0.53    0.37 
  -7   0  -5    0.97    0.54 
   7   0   5    0.35    0.59 
   8   0   5   -1.18    0.42 
  -8   0  -5   -0.25    0.40 
  -9   0  -5    1.09    0.64 
   9   0   5    1.07    0.83 
  10   0   5   -0.18    0.67 
  11   0   5    0.21    0.81 
 -11   1   5    1.05    0.75 
 -11  -1   5    0.21    0.61 
  11  -1  -5    0.78    0.75 
  11   1  -5   -0.06    0.72 
  10   1  -5    0.73    0.73 
 -10  -1   5    1.31    0.78 
 -10   1   5    1.18    0.71 
  10  -1  -5    1.56    0.76 
   9   1  -5    6.45    1.07 
  -9   1   5    6.50    1.11 
  -9  -1   5    5.70    1.10 
   9  -1  -5    5.05    0.97 
  -8   1   5    7.44    1.10 
  -8  -1   5    8.50    1.10 
   8  -1  -5    7.24    0.96 
   8   1  -5    8.78    1.03 
   7  -1  -5   -0.28    0.49 
   7   1  -5    0.10    0.49 
  -7  -1   5    0.92    0.58 
  -7   1   5    1.29    0.57 
  -6   1   5   28.88    1.62 
   6   1  -5   28.08    1.49 
   6  -1  -5   27.98    1.44 
  -6  -1   5   28.58    1.63 
  -5   1   5  123.40    3.90 
  -5  -1   5  115.59    3.87 
  -5   1   5  120.57    3.19 
   5   1  -5  117.40    3.57 
   5  -1  -5  120.28    3.50 
  -4  -1   5   18.53    1.08 
   4   1  -5   15.43    0.92 
  -4   1   5   14.86    0.96 
  -4   1   5   16.69    0.66 
   4  -1  -5   17.01    0.88 
   3   1  -5  138.37    3.68 
  -3   1   5  140.83    3.65 
   3  -1  -5  137.41    3.57 
  -3  -1   5  134.62    3.56 
  -3  -1   5  138.30    4.02 
  -3   1   5  134.51    3.98 
  -2  -1   5  360.65    9.35 
   2  -1  -5  364.65    8.52 
   2   1  -5  362.31    8.65 
  -2  -1   5  361.89    9.09 
  -2   1   5  354.09    9.33 
  -2   1   5  355.79    9.11 
  -1  -1   5   94.42    2.69 
   1  -1  -5   99.22    2.39 
  -1   1   5   97.94    2.65 
  -1  -1   5   96.34    2.64 
  -1   1   5   93.10    2.68 
   1   1  -5   97.43    2.56 
   0   1  -5    7.13    0.40 
   0   1   5    7.17    0.32 
   0  -1   5    7.11    0.42 
   0  -1   5    7.09    0.32 
   0   1   5    6.47    0.40 
   0   1  -5    7.72    0.40 
   1  -1   5  196.80    5.21 
   1  -1   5  197.66    4.89 
   1   1   5  194.17    4.82 
   1   1   5  200.71    5.20 
   2   1   5   44.72    1.46 
   2   1   5   45.64    1.46 
  -2   1  -5   45.87    1.30 
   2  -1   5   41.49    1.45 
   2  -1   5   44.82    1.49 
   3   1   5    6.91    0.59 
  -3  -1  -5    6.46    0.47 
  -3   1  -5    7.12    0.46 
   3  -1   5    7.18    0.63 
   3  -1   5    5.95    0.50 
   3   1   5    7.92    0.53 
   4  -1   5  178.57    4.81 
   4   1   5  170.33    4.73 
  -4   1  -5  178.84    4.82 
  -4  -1  -5  175.74    4.84 
   4   1   5  173.51    4.80 
   4  -1   5  172.92    4.79 
  -5  -1  -5    3.20    0.54 
   5  -1   5    3.57    0.63 
  -5   1  -5    3.48    0.53 
   6   1   5   92.97    3.26 
  -6  -1  -5   97.07    3.17 
  -6   1  -5   94.39    3.14 
   6   1   5   97.97    2.86 
  -7  -1  -5    5.96    0.83 
  -7   1  -5    7.31    0.83 
   7  -1   5    4.78    0.90 
   7   1   5    6.74    0.95 
   8   1   5   15.97    1.38 
  -8   1  -5   16.34    1.28 
  -8  -1  -5   17.15    1.25 
   8  -1   5   20.95    1.49 
   9   1   5    4.48    1.03 
  -9   1  -5    7.78    1.01 
   9  -1   5    6.10    1.13 
  -9  -1  -5    5.44    0.94 
  10  -1   5    0.92    0.67 
  10   1   5    0.79    0.68 
  11  -1   5    3.20    1.12 
  11   1   5    2.81    1.07 
  11  -2  -5    0.18    0.72 
 -11   2   5    1.12    0.74 
  11   2  -5    1.08    0.79 
 -11  -2   5    0.78    0.77 
 -10   2   5   44.76    2.61 
 -10  -2   5   46.84    2.67 
  10   2  -5   46.14    2.57 
  10  -2  -5   47.87    2.46 
  -9   2   5   15.67    1.50 
   9   2  -5   10.96    1.26 
   9  -2  -5   10.59    1.22 
  -9  -2   5   12.58    1.45 
   8  -2  -5   78.29    2.98 
   8   2  -5   78.66    3.13 
  -8  -2   5   77.98    3.31 
  -8   2   5   76.85    3.27 
   7   2  -5   91.30    3.20 
  -7  -2   5   88.73    3.38 
  -7   2   5   89.46    3.38 
   7  -2  -5   76.29    2.93 
   6   2  -5   28.69    1.54 
  -6   2   5   30.63    1.11 
   6  -2  -5   29.14    1.48 
  -6  -2   5   32.09    1.73 
  -6   2   5   30.46    1.67 
  -5  -2   5  128.92    4.13 
  -5   2   5  127.16    3.51 
   5   2  -5  126.69    3.81 
   5  -2  -5  128.66    3.64 
  -5   2   5  123.37    4.07 
   4   2  -5    0.46    0.32 
  -4  -2   5    0.46    0.34 
  -4   2   5    0.98    0.26 
  -4   2   5    0.28    0.30 
   4  -2  -5    0.15    0.27 
  -3  -2   5   13.23    0.83 
  -3   2   5   17.15    0.71 
   3  -2  -5   13.40    0.65 
  -3   2   5   13.31    0.82 
   3   2  -5   12.73    0.78 
   2   2  -5  133.59    3.53 
  -2  -2   5  129.67    3.77 
  -2   2   5  133.43    3.62 
   2  -2  -5  133.03    3.27 
  -1   2   5   59.34    1.73 
  -1  -2   5   52.56    1.64 
   1   2  -5   56.65    1.69 
  -1   2   5   54.54    1.43 
  -1  -2   5   52.82    1.70 
   0  -2   5 1662.32   42.58 
   0   2   5 1753.08   40.77 
   0   2  -5 1683.24   39.43 
   0   2   5 1732.74   43.06 
   1   2   5   27.70    0.93 
   1   2   5   30.09    1.05 
   1  -2   5   27.73    1.02 
   1  -2   5   26.47    1.05 
   2  -2   5 1658.72   37.90 
   2   2   5 1633.30   37.84 
   2   2   5 1651.43   40.48 
   2  -2   5 1601.90   40.51 
  -3   2  -5    6.66    0.44 
   3   2   5    7.04    0.50 
   3   2   5    7.06    0.61 
   3  -2   5    6.52    0.59 
  -4   2  -5  690.64   17.50 
   4   2   5  696.66   17.38 
   4  -2   5  686.22   16.58 
   4   2   5  671.25   16.58 
  -4  -2  -5  706.34   17.58 
   5  -2   5   15.67    1.10 
   5   2   5   14.55    1.10 
   5   2   5   14.48    0.78 
  -5  -2  -5   13.60    0.93 
  -5   2  -5   15.72    0.91 
   6   2   5   19.03    1.34 
  -6   2  -5   16.37    1.08 
   6   2   5   17.59    0.92 
  -6  -2  -5   18.09    1.17 
   6  -2   5   16.64    1.24 
  -7   2  -5    6.69    0.80 
   7  -2   5    5.18    0.86 
   7   2   5    5.73    0.90 
  -7  -2  -5    5.31    0.82 
  -8   2  -5    3.51    0.78 
   8  -2   5    4.02    0.89 
  -8  -2  -5    4.85    0.82 
   8   2   5    3.59    0.95 
  -9  -2  -5    2.87    0.87 
   9  -2   5    2.41    0.87 
   9   2   5    2.71    0.85 
  -9   2  -5    2.67    0.70 
  10  -2   5    1.42    0.81 
  10   2   5    0.80    0.72 
  11  -2   5   -0.97    0.71 
  11   2   5    0.22    0.73 
  11  -3  -5   -0.59    0.67 
 -11  -3   5   -0.02    0.78 
 -11   3   5    1.39    0.78 
  11   3  -5    1.58    0.92 
  10  -3  -5   10.85    1.27 
  10   3  -5    7.37    1.23 
 -10   3   5   10.05    1.39 
 -10  -3   5    9.59    1.43 
   9   3  -5    2.52    0.82 
  -9   3   5    3.65    0.89 
  -9  -3   5    2.83    0.88 
   9  -3  -5    2.98    0.82 
  -8  -3   5   -0.49    0.59 
  -8   3   5    1.15    0.65 
   8  -3  -5   -0.33    0.50 
   8   3  -5    0.16    0.61 
   7  -3  -5    7.45    0.84 
  -7   3   5    8.72    1.03 
  -7  -3   5    7.36    1.02 
   7   3  -5    6.75    0.92 
  -6   3   5   20.79    0.95 
  -6  -3   5   16.07    1.25 
   6  -3  -5   19.73    1.18 
  -6   3   5   18.38    1.31 
   6   3  -5   16.34    1.22 
   5  -3  -5  215.94    5.64 
  -5  -3   5  214.70    6.33 
  -5   3   5  216.41    5.78 
   5   3  -5  218.42    5.92 
  -5   3   5  206.59    6.26 
  -4   3   5    7.69    0.58 
   4  -3  -5    7.23    0.61 
   4   3  -5    5.98    0.66 
   4   3  -5    7.17    0.39 
  -4   3   5    7.84    0.76 
  -4  -3   5    8.71    0.79 
   3  -3  -5  266.73    6.43 
  -3   3   5  264.08    7.22 
  -3  -3   5  269.89    7.25 
   3   3  -5  263.13    6.74 
  -3   3   5  258.49    6.95 
  -2  -3   5  165.73    4.66 
  -2   3   5  165.23    4.55 
   2  -3  -5  169.88    4.04 
   2   3  -5  165.13    4.39 
   1   3  -5   25.00    1.03 
  -1   3   5   23.86    0.98 
   0   3  -5  259.00    6.44 
   0   3   5  257.68    6.85 
   0   3   5  266.01    6.20 
  -1   3  -5    6.00    0.44 
  -1   3  -5    5.76    0.43 
   1   3   5    2.52    0.29 
   2   3   5   26.46    1.03 
   2   3   5   23.57    1.00 
   2  -3   5   24.07    1.04 
   3   3   5    0.80    0.24 
   3  -3   5    1.26    0.36 
   3   3   5    1.39    0.36 
  -4   3  -5  705.00   18.07 
   4  -3   5  707.22   17.09 
   4   3   5  721.20   17.16 
   4   3   5  714.72   17.93 
   5   3   5   20.51    0.94 
   5  -3   5   19.97    1.20 
  -5   3  -5   19.25    1.03 
   5   3   5   18.80    1.20 
  -6   3  -5  391.45   10.66 
   6   3   5  405.80   10.28 
  -6  -3  -5  397.09   10.75 
  -7  -3  -5    7.49    0.89 
  -7   3  -5    6.72    0.80 
   7   3   5    7.04    0.98 
   8  -3   5   34.35    2.03 
  -8   3  -5   35.75    1.87 
  -8  -3  -5   36.73    1.94 
   8   3   5   36.46    2.16 
   9   3   5    1.44    0.82 
   9  -3   5    1.94    0.79 
  -9  -3  -5    1.57    0.70 
  10   3   5    0.24    0.77 
  10  -3   5    1.83    0.87 
  11  -3   5    0.31    0.70 
  11   3   5    0.05    0.69 
 -11   4   5    0.91    0.72 
 -11  -4   5   -0.40    0.68 
  11   4  -5    0.08    0.82 
  10  -4  -5   16.39    1.51 
 -10  -4   5   17.15    1.78 
 -10   4   5   13.80    1.60 
  10   4  -5   18.82    1.72 
  -9  -4   5   10.26    1.32 
   9  -4  -5   10.23    1.13 
  -9   4   5   10.31    1.31 
   9   4  -5    8.29    1.21 
  -8  -4   5   53.99    2.70 
   8   4  -5   53.66    2.56 
  -8   4   5   53.17    2.64 
   8  -4  -5   56.53    2.41 
  -7   4   5   10.92    1.16 
   7  -4  -5   12.64    1.06 
   7   4  -5    9.08    1.07 
  -7  -4   5   11.58    1.21 
  -6   4   5   54.15    1.98 
   6  -4  -5   58.61    2.12 
  -6  -4   5   53.94    2.44 
   6   4  -5   57.68    2.38 
  -6   4   5   53.52    2.40 
  -5   4   5    2.90    0.64 
  -5  -4   5    2.85    0.65 
   5  -4  -5    2.36    0.46 
  -5   4   5    1.45    0.44 
   5   4  -5    2.67    0.62 
   4   4  -5    0.44    0.39 
  -4   4   5    0.42    0.31 
  -4  -4   5    0.37    0.39 
   4   4  -5    0.24    0.21 
   4  -4  -5    0.19    0.29 
  -4   4   5    0.65    0.39 
  -3   4   5  123.64    3.61 
  -3  -4   5  119.43    3.77 
   3  -4  -5  129.36    3.20 
   3   4  -5  120.51    3.55 
   2   4  -5   17.50    0.93 
   2  -4  -5   18.86    0.64 
  -2   4   5   17.02    0.91 
  -1   4   5  128.46    3.67 
  -1   4   5  125.05    3.12 
   1   4  -5  128.05    3.52 
   0   4  -5  932.05   22.34 
   0   4   5  972.19   22.15 
   0   4   5  955.34   23.89 
  -1   4  -5   89.54    2.57 
   1   4   5   92.64    2.44 
  -1   4  -5   89.05    2.51 
   1   4   5   89.73    2.74 
   2   4   5 1581.67   36.43 
   2  -4   5 1537.46   36.49 
   2   4   5 1596.70   39.02 
   3  -4   5    1.45    0.38 
   3   4   5    1.16    0.31 
   3   4   5    1.37    0.39 
   4  -4   5  642.74   15.68 
   4   4   5  643.10   16.43 
   4   4   5  660.45   15.76 
   5  -4   5   18.41    1.16 
   5   4   5   19.98    1.29 
  -5   4  -5   21.04    1.10 
   5   4   5   19.29    0.98 
   6   4   5   32.62    1.29 
   6  -4   5   32.02    1.67 
  -6   4  -5   28.16    1.47 
   6   4   5   30.98    1.70 
   7  -4   5   54.06    2.34 
   7   4   5   51.69    2.42 
  -7   4  -5   56.21    2.30 
   8   4   5    2.22    0.85 
   8  -4   5    3.97    0.90 
  -8   4  -5    3.56    0.77 
   9  -4   5   19.33    1.57 
   9   4   5   17.35    1.62 
  10  -4   5   -0.03    0.72 
  10   4   5   -0.50    0.67 
  11  -4   5    0.64    0.79 
  11   4   5    0.09    0.78 
 -11   5   5    1.93    0.81 
  11   5  -5    0.47    0.84 
 -11  -5   5    0.65    0.81 
  10   5  -5   20.18    1.85 
  10  -5  -5   18.17    1.60 
 -10  -5   5   20.78    1.87 
 -10   5   5   19.90    1.77 
  -9  -5   5    4.55    1.02 
   9  -5  -5    3.68    0.86 
   9   5  -5    2.68    0.85 
  -9   5   5    4.56    1.00 
  -8   5   5   29.64    1.93 
  -8  -5   5   25.60    1.91 
   8   5  -5   29.96    1.92 
   8  -5  -5   29.10    1.68 
  -7  -5   5   94.72    3.73 
  -7   5   5   93.74    3.70 
   7  -5  -5   97.34    3.21 
   7   5  -5   94.62    3.56 
  -6  -5   5    5.38    0.91 
  -6   5   5    3.03    0.57 
  -6   5   5    4.85    0.83 
   6  -5  -5    4.17    0.66 
   6   5  -5    4.48    0.82 
  -5  -5   5  263.66    7.63 
   5   5  -5  265.66    7.18 
  -5   5   5  253.89    7.57 
  -5   5   5  258.75    7.18 
   5  -5  -5  261.89    6.68 
   5   5  -5  265.49    6.78 
   4   5  -5    9.66    0.89 
   4   5  -5   10.38    0.65 
  -4  -5   5   11.29    1.00 
  -4   5   5    9.75    0.84 
   4  -5  -5   11.73    0.71 
  -3   5   5   19.06    1.05 
   3   5  -5   18.62    1.12 
  -2   5   5  264.98    6.32 
  -2   5   5  266.63    7.21 
  -2   5   5  258.76    6.19 
   2   5  -5  271.09    6.88 
  -1   5   5   64.41    1.69 
   1   5  -5   63.69    2.12 
  -1   5   5   65.15    2.21 
   0   5  -5  604.54   14.69 
   0   5   5  612.99   15.70 
   0   5   5  624.83   14.36 
   1   5   5  199.04    4.95 
   1   5   5  197.66    5.49 
  -1   5  -5  197.08    5.13 
  -2   5  -5  547.72   13.23 
   2   5   5  547.37   13.18 
   2   5   5  554.00   14.14 
  -2   5  -5  555.10   12.98 
   3   5   5    0.32    0.36 
   3  -5   5    0.17    0.32 
   3   5   5    3.69    0.47 
   4   5   5    3.37    0.45 
   4  -5   5    3.30    0.58 
   4   5   5    3.70    0.61 
   5   5   5   32.47    1.37 
   5   5   5   32.58    1.64 
  -5   5  -5   31.23    1.46 
   5  -5   5   33.49    1.61 
   6  -5   5   20.40    1.32 
   6   5   5   23.31    1.53 
   6   5   5   22.86    1.09 
  -6   5  -5   20.81    1.25 
  -7   5  -5    2.14    0.64 
   7  -5   5    2.26    0.72 
   7   5   5    0.98    0.66 
   8  -5   5   -0.17    0.60 
   8   5   5    0.13    0.69 
  -8   5  -5    0.38    0.51 
   9   5   5   23.44    1.93 
   9  -5   5   24.28    1.78 
  10   5   5    3.23    1.01 
  10  -5   5    3.51    1.00 
  11  -5   5   31.24    2.24 
  11   5   5   29.06    2.34 
 -11   6   5    1.17    0.84 
  11   6  -5    2.23    0.99 
  10   6  -5    5.54    1.17 
 -10   6   5    4.17    1.07 
   9   6  -5    0.54    0.69 
   9  -6  -5    0.30    0.64 
  -9   6   5    1.24    0.69 
  -8   6   5    3.63    0.93 
   8   6  -5    5.13    1.02 
   8  -6  -5    4.50    0.81 
  -8  -6   5    3.76    0.95 
  -7  -6   5   55.21    2.75 
  -7   6   5   62.62    2.84 
   7   6  -5   56.50    2.63 
   7  -6  -5   62.16    2.37 
   6   6  -5    3.66    0.76 
  -6   6   5    4.59    0.82 
  -6   6   5    3.34    0.62 
   6  -6  -5    4.75    0.65 
  -5   6   5  510.99   13.66 
   5  -6  -5  520.82   12.61 
  -5   6   5  511.25   14.06 
   5   6  -5  538.79   13.28 
   4   6  -5   14.07    1.07 
   4   6  -5   14.51    0.83 
   4  -6  -5   13.06    0.77 
  -4   6   5   13.28    1.03 
   3   6  -5 1800.36   42.09 
   3  -6  -5 1824.31   41.56 
  -3   6   5 1779.08   44.90 
   2   6  -5  209.45    5.56 
  -2   6   5  200.59    5.81 
  -2   6   5  200.88    4.95 
  -1   6   5 1136.22   26.73 
  -1   6   5 1165.85   29.05 
   1   6  -5 1160.61   27.17 
   0   6   5  103.83    2.73 
   0   6  -5  104.85    3.10 
   0   6   5  103.02    3.28 
   1   6   5   97.84    3.11 
   1   6   5   97.13    2.70 
  -1   6  -5   97.49    2.90 
  -2   6  -5    3.00    0.45 
  -2   6  -5    2.69    0.43 
   2   6   5    2.69    0.43 
   2   6   5    3.50    0.50 
   3   6   5    2.22    0.44 
   3   6   5    2.43    0.49 
   3  -6   5    3.03    0.53 
   4  -6   5   10.74    0.90 
   4   6   5   11.81    0.81 
   4   6   5   11.50    0.91 
   5  -6   5  104.29    3.33 
   5   6   5  106.72    3.20 
   5   6   5   89.98    3.31 
   6  -6   5    5.86    0.80 
   6   6   5    5.77    0.59 
  -6   6  -5    5.68    0.74 
   6   6   5    5.25    0.88 
  -7   6  -5  251.61    8.01 
   7  -6   5  292.19    7.86 
   7   6   5  298.70    8.15 
   8   6   5    4.40    0.96 
   8  -6   5    3.71    0.83 
  -8   6  -5    5.09    0.84 
   9   6   5   94.48    3.99 
   9  -6   5   94.03    3.72 
  10  -6   5    0.27    0.64 
  10   6   5    0.15    0.77 
  11  -6   5    2.85    1.10 
  11   6   5    2.81    1.12 
 -11   7   5    1.39    0.80 
  11   7  -5   -0.12    0.84 
  10   7  -5   20.55    1.96 
 -10   7   5   20.94    1.86 
  -9   7   5   20.17    1.78 
   9   7  -5   16.78    1.69 
  -8   7   5   65.53    3.14 
   8   7  -5   65.83    3.08 
   8  -7  -5   67.58    2.64 
   7   7  -5  123.48    4.49 
  -7   7   5  130.64    4.70 
   7  -7  -5  128.09    3.98 
  -6   7   5   14.13    1.26 
   6  -7  -5   12.91    0.96 
   6   7  -5   11.94    1.18 
  -6   7   5   11.26    1.05 
  -5   7   5  107.87    3.69 
   5   7  -5  103.77    3.71 
   5   7  -5  118.64    3.40 
   5  -7  -5  113.65    3.26 
   4   7  -5    3.41    0.51 
   4   7  -5    4.77    0.74 
  -4   7   5    3.53    0.65 
   4  -7  -5    4.28    0.49 
   3   7  -5   29.68    1.52 
  -3   7   5   30.28    1.09 
  -3   7   5   29.19    1.55 
  -3   7   5   30.57    1.07 
  -2   7   5    0.03    0.33 
  -2   7   5   -0.01    0.20 
   2   7  -5   -0.08    0.34 
  -1   7   5  588.24   13.87 
  -1   7   5  590.30   15.40 
   1   7  -5  593.00   14.40 
   0   7   5   17.88    1.10 
   0   7  -5   19.77    1.10 
   0   7   5   20.14    0.85 
   1   7   5  687.67   16.32 
  -1   7  -5  690.04   16.56 
   1   7   5  692.52   17.78 
   2   7   5  393.91   10.46 
  -2   7  -5  388.86    9.54 
  -2   7  -5  393.12    9.73 
   2   7   5  390.03    9.66 
  -3   7  -5    2.26    0.51 
   3   7   5    0.98    0.48 
   3   7   5    1.07    0.49 
  -3   7  -5    1.71    0.49 
   4   7   5  132.81    4.08 
   4  -7   5  129.31    3.98 
   4   7   5  136.77    4.09 
   5   7   5   97.86    3.20 
   5  -7   5   96.69    3.29 
   5   7   5   99.98    3.43 
  -6   7  -5   40.40    1.94 
   6   7   5   41.01    1.71 
   6   7   5   39.17    2.05 
   6  -7   5   41.49    1.95 
  -7   7  -5    4.36    0.83 
   7  -7   5    4.62    0.88 
   7   7   5    4.68    0.97 
  -8   7  -5   15.32    1.29 
   8  -7   5   15.95    1.37 
   8   7   5   14.86    1.52 
   9   7   5   20.33    1.81 
   9  -7   5   24.56    1.76 
  10   7   5    1.61    0.97 
  10  -7   5    2.13    0.78 
  11  -7   5   34.45    2.35 
  11   7   5   30.11    2.45 
  10   8  -5    0.93    0.87 
 -10   8   5    3.58    0.99 
   9   8  -5    0.54    0.72 
  -9   8   5    0.06    0.70 
  -8   8   5    4.99    1.11 
   8   8  -5    5.79    1.16 
  -7   8   5   11.41    1.38 
   7   8  -5    9.97    1.29 
  -7   8   5   13.09    1.23 
   6   8  -5   15.55    1.42 
  -6   8   5   15.12    1.24 
  -6   8   5   15.67    1.46 
   6  -8  -5   15.67    1.12 
   5   8  -5  149.68    4.92 
  -5   8   5  155.07    4.99 
   5  -8  -5  161.23    4.34 
   5   8  -5  162.14    4.65 
   4   8  -5   15.02    1.00 
  -4   8   5   14.06    0.79 
   4   8  -5   15.44    1.20 
  -4   8   5   14.57    1.18 
  -4   8   5   15.24    0.84 
   3   8  -5  436.87   11.17 
  -3   8   5  430.99   10.42 
  -3   8   5  440.24   11.84 
   2   8  -5   12.89    1.05 
  -2   8   5   11.45    0.67 
  -2   8   5   11.19    0.99 
  -1   8   5   99.70    2.72 
  -1   8   5   99.80    3.44 
   1   8  -5   99.12    3.18 
   0   8   5   20.91    1.31 
   0   8  -5   21.80    1.23 
   0   8   5   20.96    0.95 
   1   8   5   24.66    1.39 
  -1   8  -5   30.76    1.41 
   1   8   5   27.79    1.20 
   2   8   5   10.91    0.94 
   2   8   5   11.95    1.03 
  -2   8  -5   11.02    0.96 
   3   8   5   22.31    1.32 
  -3   8  -5   22.83    1.22 
  -3   8  -5   24.46    1.27 
   3   8   5   23.32    1.28 
   4   8   5    1.17    0.48 
   4   8   5    1.47    0.60 
   5   8   5    5.25    0.82 
   5  -8   5    5.80    0.82 
   5   8   5    7.82    0.80 
   6   8   5    0.48    0.58 
   6  -8   5    2.10    0.66 
   7  -8   5   90.64    3.34 
   7   8   5   84.26    3.47 
  -7   8  -5   85.16    3.35 
   8  -8   5    7.69    1.09 
   8   8   5    7.93    1.25 
  -8   8  -5    8.20    1.08 
   9  -8   5   36.84    2.17 
   9   8   5   35.68    2.38 
  10   8   5    3.37    1.10 
  10  -8   5    1.59    0.87 
  10   9  -5    2.58    1.06 
 -10   9   5    4.87    1.23 
   9   9  -5    0.29    0.70 
  -9   9   5   -0.38    0.60 
   8   9  -5    5.72    1.23 
  -8   9   5    8.26    1.32 
  -7   9   5    5.01    1.04 
   7   9  -5    4.16    1.04 
  -7   9   5    4.68    0.88 
   6   9  -5    3.54    0.99 
  -6   9   5    3.25    0.80 
   5   9  -5    4.36    0.65 
  -5   9   5    5.19    0.85 
   5   9  -5    3.50    0.87 
  -4   9   5    4.23    0.53 
  -4   9   5    3.92    0.53 
   4   9  -5    1.58    0.64 
   4   9  -5    4.38    0.84 
  -4   9   5    2.82    0.77 
  -3   9   5    0.66    0.61 
   3   9  -5    0.39    0.58 
  -3   9   5    0.72    0.36 
   3   9  -5    0.03    0.45 
  -2   9   5    1.12    0.66 
  -2   9   5    1.53    0.40 
   2   9  -5    2.17    0.65 
  -1   9   5    5.12    0.79 
  -1   9   5    4.16    0.46 
   1   9  -5    5.48    0.75 
   0   9   5   11.91    0.79 
   0   9   5   10.80    1.01 
   0   9  -5   13.87    1.02 
   1   9   5    1.17    0.40 
  -1   9  -5    1.14    0.44 
   1   9   5    0.58    0.40 
  -2   9  -5   15.36    1.02 
   2   9   5   14.58    1.11 
   2   9   5   14.60    0.97 
   3   9   5    7.65    0.84 
   3   9   5    7.10    0.80 
  -3   9  -5    7.91    0.79 
  -3   9  -5    6.13    0.72 
   4   9   5    4.26    0.71 
  -4   9  -5    4.47    0.70 
   4   9   5    3.84    0.73 
  -4   9  -5    5.20    0.73 
   5   9   5    4.12    0.82 
   5   9   5    5.22    0.74 
   6   9   5    3.27    0.91 
   6  -9   5    4.87    0.89 
   7   9   5    4.21    0.99 
   7  -9   5    4.51    0.90 
  -7   9  -5    5.43    0.90 
   8   9   5    0.04    0.72 
  -8   9  -5    1.00    0.71 
   8  -9   5    1.16    0.76 
   9   9   5    0.62    0.80 
   9  -9   5    0.66    0.59 
  10   9   5   -0.17    0.84 
  10  -9   5   -0.48    0.70 
  10  10  -5    5.40    1.39 
 -10  10   5    7.87    1.46 
   9  10  -5    2.75    1.02 
  -9  10   5    2.83    0.93 
  -8  10   5    9.73    1.46 
   8  10  -5    8.99    1.48 
   7  10  -5   19.87    1.72 
  -7  10   5   21.58    1.71 
  -7  10   5   23.01    1.85 
   6  10  -5    4.78    1.03 
  -6  10   5    5.10    0.95 
  -5  10   5   66.02    2.97 
   5  10  -5   74.41    2.75 
   5  10  -5   76.99    3.13 
   4  10  -5    3.79    0.82 
   4  10  -5    4.28    0.73 
  -4  10   5    4.76    0.88 
  -4  10   5    4.79    0.54 
   3  10  -5  156.29    4.87 
  -3  10   5  149.67    4.08 
   3  10  -5  156.00    4.80 
  -3  10   5  148.76    5.05 
  -2  10   5    4.49    0.79 
   2  10  -5    4.20    0.77 
  -2  10   5    4.44    0.49 
  -1  10   5   63.75    1.99 
  -1  10   5   52.74    2.48 
   1  10  -5   65.49    2.46 
   0  10  -5  130.38    3.91 
   0  10   5  118.17    4.19 
   0  10   5  120.40    3.47 
   1  10   5    7.19    0.72 
  -1  10  -5    7.61    0.83 
   1  10   5    8.16    0.94 
  -2  10  -5  115.42    3.59 
   2  10   5  110.37    3.47 
   2  10   5  110.12    3.92 
  -3  10  -5    1.90    0.56 
   3  10   5    1.00    0.55 
   3  10   5    0.96    0.57 
   4  10   5   35.25    1.85 
  -4  10  -5   31.63    1.62 
   4  10   5   34.34    1.83 
  -4  10  -5   32.75    1.67 
   5  10   5    9.02    0.97 
   5  10   5    9.34    1.11 
  -5  10  -5   10.44    0.97 
  -5  10  -5   10.17    0.99 
   6  10   5    0.49    0.59 
   7 -10   5   13.63    1.33 
   7  10   5   14.81    1.49 
   8 -10   5    0.89    0.72 
   8  10   5    0.80    0.81 
  -8  10  -5    1.67    0.76 
   9  10   5    3.73    1.17 
   9 -10   5    5.79    1.09 
  10  10   5    0.79    0.89 
  -9  11   5    8.47    1.52 
   9  11  -5    8.89    1.58 
   8  11  -5   11.00    1.57 
  -8  11   5    8.83    1.41 
  -7  11   5   22.36    1.73 
   7  11  -5   22.61    1.87 
   6  11  -5    9.31    1.36 
  -6  11   5    7.12    1.14 
   5  11  -5   13.63    1.40 
  -5  11   5   14.52    1.39 
   5  11  -5   14.18    1.20 
  -4  11   5   -0.70    0.53 
   4  11  -5   -0.28    0.45 
   4  11  -5   -0.35    0.53 
   3  11  -5   53.92    2.44 
   3  11  -5   54.80    2.40 
  -3  11   5   51.45    2.56 
  -2  11   5   -0.20    0.31 
   2  11  -5   -0.22    0.45 
   2  11  -5    0.36    0.56 
  -2  11   5    0.45    0.58 
   1  11  -5  107.73    3.63 
  -1  11   5  108.06    3.16 
  -1  11   5  110.65    4.01 
   0  11   5    5.96    0.66 
   0  11   5    5.61    0.91 
   1  11   5   39.10    2.04 
   1  11   5   42.30    1.74 
  -1  11  -5   39.67    1.86 
   2  11   5   38.72    2.02 
   2  11   5   38.74    1.73 
  -2  11  -5   36.47    1.79 
  -3  11  -5   -0.17    0.45 
   3  11   5   -0.06    0.46 
   3  11   5    0.56    0.52 
   4  11   5   70.25    2.88 
  -4  11  -5   67.81    2.59 
   4  11   5   65.23    2.71 
  -5  11  -5    8.00    0.95 
   5  11   5    9.34    1.04 
   5  11   5    8.17    1.10 
  -5  11  -5    7.05    0.90 
  -6  11  -5   40.36    2.02 
   6  11   5   40.23    2.28 
  -6  11  -5   40.29    1.95 
  -7  11  -5    2.03    0.73 
   7  11   5    2.37    0.92 
  -7  11  -5    2.53    0.71 
   8  11   5    6.92    1.30 
   9  11   5   16.20    1.87 
  -9  12   5    0.61    0.82 
   9  12  -5   -0.66    0.73 
  -8  12   5    0.54    0.68 
   8  12  -5    1.37    0.97 
   7  12  -5   10.01    1.44 
  -7  12   5   11.50    1.34 
  -6  12   5    8.50    1.22 
   6  12  -5    6.89    1.25 
   5  12  -5   83.60    3.22 
  -5  12   5   79.24    3.50 
   5  12  -5   82.02    3.49 
   4  12  -5    1.30    0.73 
   4  12  -5    0.90    0.55 
  -4  12   5    0.74    0.69 
   3  12  -5  169.76    5.30 
   3  12  -5  160.12    5.40 
  -3  12   5  170.56    5.73 
  -2  12   5    3.94    0.94 
   2  12  -5    2.57    0.78 
   2  12  -5    4.70    0.85 
  -1  12   5   32.57    1.41 
  -1  12   5   28.62    1.91 
   1  12  -5   29.99    1.71 
   0  12   5   13.27    1.31 
   0  12   5   13.81    0.98 
   0  12  -5   13.51    1.13 
  -1  12  -5    0.03    0.42 
   1  12   5    0.46    0.47 
   1  12   5    4.34    0.85 
   2  12   5   -0.44    0.41 
  -2  12  -5    0.22    0.47 
   2  12   5    0.63    0.54 
  -3  12  -5    0.07    0.47 
   3  12   5    0.03    0.49 
   3  12   5   -0.19    0.47 
   4  12   5    2.15    0.72 
   4  12   5    1.57    0.67 
  -4  12  -5    2.89    0.70 
   5  12   5   29.68    1.92 
  -5  12  -5   28.08    1.69 
   5  12   5   26.96    1.78 
  -5  12  -5   27.09    1.60 
  -6  12  -5    2.52    0.75 
   6  12   5    2.29    0.91 
  -6  12  -5    2.19    0.69 
  -7  12  -5   56.38    2.94 
   7  12   5   52.56    2.82 
  -7  12  -5   55.78    2.61 
  -7  12  -5   56.29    2.54 
   8  12   5    1.42    0.85 
   9  12   5   27.26    2.29 
  -9  13   5    4.56    1.20 
   9  13  -5    3.69    1.23 
   8  13  -5    7.49    1.46 
  -8  13   5    9.82    1.56 
  -7  13   5   18.09    1.69 
   7  13  -5   17.93    1.88 
  -6  13   5   -0.03    0.75 
   6  13  -5    1.13    0.86 
  -5  13   5   29.80    2.11 
   5  13  -5   30.11    2.00 
   4  13  -5    2.18    0.72 
  -4  13   5    1.14    0.80 
   4  13  -5    2.37    0.80 
  -3  13   5    1.14    0.68 
   3  13  -5    0.74    0.55 
   3  13  -5    0.93    0.65 
   2  13  -5    0.86    0.54 
   2  13  -5    0.02    0.55 
  -2  13   5    1.39    0.70 
  -1  13   5   16.01    1.51 
   1  13  -5   15.70    1.35 
   1  13  -5   16.76    1.44 
   0  13   5   20.60    1.64 
   0  13  -5   20.61    1.45 
   0  13   5   20.82    1.22 
   1  13   5    9.20    1.20 
  -1  13  -5    7.51    0.97 
   1  13   5    6.85    0.87 
   2  13   5    5.21    0.81 
   2  13   5    3.67    0.87 
  -2  13  -5    5.22    0.85 
  -3  13  -5   10.20    1.11 
   3  13   5   11.34    1.19 
   3  13   5   10.33    1.26 
   4  13   5    4.20    0.93 
  -4  13  -5    3.08    0.78 
   4  13   5    3.29    0.85 
  -5  13  -5   50.35    2.30 
   5  13   5   44.42    2.43 
   5  13   5   47.34    2.49 
  -6  13  -5    1.48    0.81 
  -6  13  -5    2.21    0.74 
   6  13   5    3.86    0.99 
  -6  13  -5    2.66    0.78 
  -7  13  -5    5.34    1.08 
   7  13   5    5.67    1.19 
   8  13   5    0.28    0.83 
  -8  14   5   17.97    2.03 
   8  14  -5   19.44    2.07 
   7  14  -5    3.06    1.18 
  -7  14   5    2.23    0.97 
  -6  14   5   24.16    1.98 
   6  14  -5   24.87    1.98 
  -5  14   5   -0.10    0.78 
   5  14  -5    0.16    0.74 
  -4  14   5    3.95    1.07 
   4  14  -5    5.27    0.94 
   4  14  -5    5.05    1.05 
   3  14  -5   21.62    1.67 
  -3  14   5   20.84    1.87 
   3  14  -5   22.36    1.69 
   2  14  -5    4.33    0.91 
  -2  14   5    1.91    0.83 
   2  14  -5    1.79    0.77 
  -1  14   5   19.12    1.65 
   1  14  -5   19.56    1.50 
   1  14  -5   21.51    1.71 
   0  14  -5   64.66    2.70 
   0  14  -5   62.53    3.00 
   0  14   5   63.27    3.11 
  -1  14  -5    0.02    0.56 
   1  14   5   -0.11    0.56 
  -1  14  -5    0.29    0.59 
   1  14   5    1.41    0.64 
   2  14   5  119.61    3.82 
  -2  14  -5  107.63    3.79 
   2  14   5  107.64    4.30 
   3  14   5   12.56    1.37 
   3  14   5   13.44    1.25 
  -3  14  -5   13.96    1.24 
   4  14   5   68.80    2.97 
   4  14   5   68.83    3.19 
  -4  14  -5   69.28    2.87 
  -5  14  -5    1.24    0.69 
   5  14   5    0.92    0.70 
   5  14   5    0.47    0.62 
  -5  14  -5   -0.31    0.61 
  -6  14  -5    8.04    1.24 
   6  14   5    9.96    1.36 
   7  14   5   11.39    1.53 
  -7  14  -5   10.20    1.41 
   8  14   5    1.34    0.95 
   7  15  -5    3.58    1.23 
  -7  15   5    2.58    1.06 
  -6  15   5    5.19    1.19 
   6  15  -5    3.78    1.11 
  -5  15   5   47.97    2.84 
   5  15  -5   47.41    2.73 
   4  15  -5   -0.40    0.64 
  -4  15   5    0.08    0.74 
   4  15  -5    0.58    0.71 
  -3  15   5   27.18    2.10 
   3  15  -5   26.38    1.87 
   3  15  -5   27.12    1.90 
   2  15  -5   27.04    1.96 
   2  15  -5   25.58    1.80 
  -2  15   5   27.27    2.08 
   1  15  -5    8.54    1.09 
   1  15  -5    9.32    1.24 
  -1  15   5    6.46    1.24 
   0  15  -5   48.54    2.30 
   0  15   5   45.68    2.62 
   0  15  -5   42.10    2.53 
  -1  15  -5    0.75    0.60 
  -1  15  -5    1.03    0.60 
   1  15   5   -0.44    0.65 
  -2  15  -5    1.06    0.63 
  -2  15  -5   -0.20    0.54 
   2  15   5   -0.03    0.49 
   2  15   5   -0.16    0.59 
   3  15   5    4.49    0.90 
  -3  15  -5    5.17    0.90 
  -3  15  -5    4.01    0.98 
   3  15   5    3.58    0.96 
  -4  15  -5   38.03    2.10 
   4  15   5   40.24    2.42 
   4  15   5   35.68    2.12 
  -4  15  -5   36.22    2.38 
   5  15   5   15.06    1.56 
   5  15   5   18.01    1.61 
  -5  15  -5   14.78    1.63 
   6  15   5   34.92    2.34 
  -6  15  -5   31.99    2.35 
  -7  15  -5    4.60    1.17 
   7  15   5    6.18    1.31 
   7  16  -5   11.24    1.67 
  -7  16   5   10.26    1.59 
   6  16  -5    6.83    1.42 
  -6  16   5    5.85    1.35 
   5  16  -5   10.70    1.46 
  -5  16   5    8.71    1.46 
   4  16  -5   -0.14    0.71 
  -4  16   5   -0.20    0.73 
   4  16  -5   -0.02    0.57 
  -3  16   5   -0.05    0.66 
   3  16  -5    0.66    0.61 
   3  16  -5    0.98    0.70 
   2  16  -5    1.96    0.87 
  -2  16   5    2.98    1.00 
   2  16  -5    2.79    0.90 
   1  16  -5    8.68    1.18 
   1  16  -5    9.36    1.28 
  -1  16   5   10.69    1.44 
   0  16  -5   85.97    3.82 
   0  16  -5   83.81    3.27 
   0  16   5   77.81    3.72 
  -1  16  -5    1.31    0.69 
  -1  16  -5    1.25    0.72 
   1  16   5    1.79    0.86 
  -2  16  -5  135.28    5.35 
  -2  16  -5  140.96    4.65 
   2  16   5  144.33    5.40 
  -3  16  -5    0.01    0.72 
   3  16   5    0.18    0.73 
   4  16   5   56.73    3.07 
   4  16   5   64.04    2.92 
  -4  16  -5   60.02    3.25 
   5  16   5    0.36    0.74 
  -5  16  -5   -0.31    0.56 
   5  16   5    0.77    0.79 
   6  16   5    3.07    1.03 
  -6  16  -5    3.46    1.10 
  -7  16  -5    1.79    0.90 
   7  16   5   -0.55    0.79 
  -6  17   5    2.99    1.11 
   6  17  -5    3.15    1.18 
  -5  17   5   12.14    1.70 
   5  17  -5   10.32    1.51 
  -4  17   5   -0.97    0.75 
   4  17  -5    0.60    0.71 
   4  17  -5    0.20    0.74 
  -3  17   5    7.51    1.41 
   3  17  -5    8.60    1.25 
   3  17  -5    4.94    1.09 
   2  17  -5   11.35    1.43 
  -2  17   5    8.27    1.43 
   2  17  -5   10.41    1.33 
  -1  17   5    2.16    0.92 
   1  17  -5    2.10    0.79 
   1  17  -5    2.48    0.99 
   0  17  -5   26.28    1.81 
   0  17   5   21.87    1.97 
   0  17  -5   24.40    1.96 
  -1  17  -5    0.51    0.72 
   1  17   5    0.23    0.76 
  -1  17  -5    1.06    0.72 
  -2  17  -5    0.77    0.72 
   2  17   5   -0.23    0.64 
   3  17   5    0.38    0.71 
  -3  17  -5    0.42    0.79 
   4  17   5   17.25    1.76 
  -4  17  -5   15.88    1.77 
  -5  17  -5    0.50    0.81 
  -6  17  -5   16.66    1.85 
   6  17   5   15.84    1.79 
  -5  18   5    1.38    0.86 
   5  18  -5    0.89    0.86 
  -4  18   5    4.18    1.24 
   4  18  -5    4.82    1.18 
   4  18  -5    4.77    1.04 
   3  18  -5    9.16    1.38 
  -3  18   5    8.81    1.53 
   3  18  -5    9.42    1.33 
   2  18  -5    6.85    1.17 
  -2  18   5    5.17    1.29 
   2  18  -5    4.47    1.13 
   1  18  -5   13.54    1.63 
  -1  18   5   14.06    1.75 
   1  18  -5   15.92    1.50 
   0  18   5   -1.38    0.61 
   0  18  -5    0.52    0.67 
   0  18  -5    0.06    0.61 
  -1  18  -5    5.31    1.19 
   1  18   5    6.92    1.34 
  -2  18  -5    3.96    1.05 
   2  18   5    4.85    1.18 
  -3  18  -5    3.16    1.02 
   3  18   5    3.12    0.99 
   4  18   5    1.08    0.80 
  -4  18  -5    1.81    0.97 
  -5  18  -5    0.83    0.88 
   3  19  -5    1.29    0.89 
   3  19  -5    0.40    0.83 
  -3  19   5    1.03    0.79 
  -2  19   5    1.15    0.91 
   2  19  -5    0.12    0.80 
   2  19  -5    1.45    0.82 
   1  19  -5    3.65    1.11 
  -1  19   5    3.66    1.12 
   0  19  -5    3.83    1.10 
   0  19   5    5.98    1.33 
  -1  19  -5    5.89    1.29 
   1  19   5    4.00    1.20 
  -2  19  -5    2.28    1.08 
   2  19   5    3.14    1.13 
  -3  19  -5    1.32    0.96 
   3  19   5    1.67    0.97 
   1  20  -5   -0.05    0.66 
  -1  20   5    0.08    0.82 
   0  20  -5    6.75    1.42 
   0  20   5    8.51    1.59 
  -1  20  -5    1.43    0.89 
   1  20   5   -0.53    0.78 
  11   0  -6   10.46    1.43 
 -11   0   6   11.79    1.57 
 -10   0   6    7.12    1.23 
  10   0  -6    6.83    1.12 
   9   0  -6    0.23    0.66 
  -9   0   6    0.54    0.74 
   8   0  -6    3.62    0.75 
  -8   0   6    3.92    0.86 
  -7   0   6   10.86    1.16 
   7   0  -6    9.08    0.99 
  -6   0   6  153.47    4.97 
   6   0  -6  158.85    4.55 
  -5   0   6  712.65   18.39 
   5   0  -6  699.11   16.94 
  -4   0   6  157.93    4.01 
   4   0  -6  152.90    4.14 
  -4   0   6  149.75    4.56 
   3   0  -6 2408.73   55.98 
  -3   0   6 2323.40   59.23 
  -3   0   6 2417.08   59.50 
  -2   0   6  127.65    3.73 
  -2   0   6  134.04    3.53 
   2   0  -6  133.68    3.38 
   1   0  -6 3825.98   94.63 
  -1   0   6 4148.05  102.43 
  -1   0   6 4176.30  102.27 
   0   0   6   -0.99    0.16 
   0   0   6   -1.31    0.21 
   0   0  -6   -1.06    0.19 
   0   0  -6   -1.03    0.18 
   1   0   6  139.71    3.93 
   1   0   6  142.76    3.68 
   2   0   6   10.54    0.61 
   2   0   6   10.23    0.58 
  -2   0  -6   10.54    0.40 
   3   0   6  603.97   15.37 
  -3   0  -6  625.60   15.30 
   3   0   6  593.10   14.52 
  -4   0  -6    2.65    0.35 
   4   0   6    3.27    0.52 
   4   0   6    2.31    0.34 
   5   0   6   87.00    2.65 
   5   0   6   81.91    2.84 
  -5   0  -6   84.95    2.71 
  -6   0  -6    0.76    0.35 
   6   0   6    0.01    0.38 
  -7   0  -6   23.10    1.37 
   7   0   6   25.89    1.66 
  -8   0  -6    5.04    0.79 
   8   0   6    4.85    0.93 
   9   0   6   35.30    2.22 
  10   0   6    6.20    1.17 
  11   0   6    2.67    1.08 
  11  -1  -6   13.99    1.51 
  11   1  -6   11.22    1.48 
 -11   1   6   13.42    1.64 
 -11  -1   6   14.30    1.70 
 -10   1   6   33.65    2.27 
 -10  -1   6   35.21    2.33 
  10   1  -6   35.01    2.20 
  10  -1  -6   35.38    2.10 
  -9   1   6   11.64    1.38 
   9  -1  -6   13.12    1.30 
   9   1  -6   10.35    1.22 
  -9  -1   6   12.33    1.44 
  -8   1   6   18.02    1.53 
  -8  -1   6   20.45    1.57 
   8  -1  -6   19.98    1.41 
   8   1  -6   20.70    1.49 
  -7   1   6    5.10    0.87 
   7  -1  -6    3.88    0.75 
   7   1  -6    5.84    0.83 
  -7  -1   6    5.01    0.87 
   6  -1  -6    8.76    0.84 
   6   1  -6    8.39    0.89 
  -6   1   6    9.92    1.02 
  -6  -1   6    9.11    0.98 
   5   1  -6   73.23    2.49 
   5  -1  -6   74.23    2.42 
  -5  -1   6   74.46    2.79 
  -5   1   6   73.10    2.08 
  -5   1   6   71.70    2.72 
  -4   1   6   11.30    0.85 
   4   1  -6   10.26    0.78 
  -4   1   6   11.27    0.55 
   4  -1  -6   11.33    0.74 
  -4  -1   6   10.98    0.85 
  -3  -1   6   94.26    2.52 
   3   1  -6   94.76    2.68 
  -3  -1   6   91.24    2.93 
  -3   1   6   93.30    2.60 
   3  -1  -6   94.70    2.57 
  -3   1   6   91.24    2.91 
   2   1  -6    1.74    0.30 
  -2   1   6    1.49    0.23 
  -2  -1   6    1.87    0.33 
  -2  -1   6    1.94    0.23 
   2  -1  -6    1.96    0.23 
  -2   1   6    1.51    0.31 
  -1  -1   6 2549.73   63.91 
   1  -1  -6 2610.64   60.66 
  -1   1   6 2597.64   65.67 
  -1   1   6 2568.53   64.61 
  -1  -1   6 2555.83   63.60 
   1   1  -6 2522.69   61.31 
   0  -1   6   35.22    1.19 
   0   1   6   36.01    1.01 
   0  -1   6   34.27    1.04 
   0   1  -6   34.06    1.07 
   0   1   6   32.95    1.17 
   0   1  -6   33.22    1.09 
   1  -1   6 3438.52   86.74 
   1   1   6 3636.57   88.64 
   1   1   6 3462.31   81.46 
   1  -1   6 3379.51   82.30 
   2   1   6    0.09    0.21 
   2   1   6    0.26    0.18 
  -2   1  -6    0.54    0.11 
   2  -1   6    0.17    0.22 
   2  -1   6    0.97    0.24 
   3   1   6  571.37   14.28 
  -3  -1  -6  559.27   14.22 
   3  -1   6  548.12   13.51 
   3  -1   6  558.90   14.30 
  -3   1  -6  577.42   14.20 
   3   1   6  562.47   13.53 
   4  -1   6    6.63    0.55 
  -4   1  -6    5.42    0.49 
   4   1   6    6.21    0.53 
   4   1   6    5.25    0.61 
  -4  -1  -6    5.90    0.50 
   4  -1   6    6.05    0.62 
  -5   1  -6    6.62    0.61 
   5   1   6    4.89    0.69 
   5   1   6    5.81    0.53 
  -5  -1  -6    6.32    0.63 
   5  -1   6    5.82    0.75 
   6  -1   6    5.82    0.80 
  -6   1  -6    6.12    0.68 
   6   1   6    6.68    0.60 
   6   1   6    6.70    0.88 
  -6  -1  -6    6.96    0.71 
   7  -1   6   -0.41    0.47 
   7   1   6   -0.20    0.49 
  -7  -1  -6   -0.65    0.38 
  -7   1  -6    0.21    0.45 
   8  -1   6    0.29    0.56 
   8   1   6   -0.36    0.56 
  -8   1  -6    0.02    0.55 
  -8  -1  -6    0.71    0.52 
   9   1   6   37.79    2.31 
   9  -1   6   38.95    2.28 
  10  -1   6    0.11    0.66 
  10   1   6   -0.50    0.56 
  11   1   6   37.67    2.56 
  11  -1   6   37.10    2.52 
  11   2  -6    5.07    1.16 
  11  -2  -6    6.04    1.14 
 -11  -2   6    7.15    1.34 
 -11   2   6    8.50    1.38 
 -10   2   6    1.76    0.89 
  10  -2  -6    2.38    0.82 
 -10  -2   6    3.38    1.04 
  10   2  -6    2.77    0.95 
   9   2  -6   -0.01    0.55 
  -9   2   6    0.59    0.65 
  -9  -2   6   -0.44    0.56 
   9  -2  -6   -0.16    0.60 
   8   2  -6   38.44    2.07 
  -8  -2   6   41.44    2.25 
  -8   2   6   42.41    2.26 
   8  -2  -6   39.75    2.01 
   7   2  -6    1.97    0.63 
  -7  -2   6    2.69    0.76 
  -7   2   6    2.44    0.67 
   7  -2  -6    1.90    0.63 
  -6   2   6  161.54    4.12 
  -6   2   6  144.38    4.86 
   6  -2  -6  160.47    4.41 
  -6  -2   6  136.05    4.82 
   6   2  -6  154.00    4.56 
  -5   2   6   29.40    1.12 
   5  -2  -6   29.40    1.30 
   5   2  -6   27.97    1.39 
  -5   2   6   29.38    1.53 
  -5  -2   6   32.12    1.63 
  -4   2   6   37.07    1.67 
  -4  -2   6   38.94    1.73 
   4   2  -6   37.55    1.55 
   4  -2  -6   41.67    1.43 
  -4   2   6   42.70    1.39 
   3   2  -6  221.42    5.75 
  -3   2   6  219.64    6.19 
  -3   2   6  228.41    5.91 
  -3  -2   6  223.18    6.22 
   3  -2  -6  228.98    5.53 
  -2  -2   6    3.29    0.42 
  -2   2   6    3.11    0.34 
   2  -2  -6    3.06    0.26 
  -2   2   6    3.41    0.40 
   2   2  -6    3.02    0.40 
  -2  -2   6    2.75    0.29 
   1  -2  -6  203.23    4.79 
   1   2  -6  196.45    4.97 
  -1   2   6  196.12    5.22 
  -1  -2   6  192.34    5.16 
  -1  -2   6  190.05    5.22 
   0   2   6   20.83    0.65 
   0  -2   6   18.47    0.83 
   0   2   6   17.67    0.82 
   0   2  -6   20.09    0.84 
   1  -2   6  149.28    3.91 
   1   2   6  151.00    4.12 
   1  -2   6  146.94    4.14 
   1   2   6  155.31    3.79 
   2   2   6  246.18    6.02 
   2   2   6  239.25    6.35 
   2  -2   6  240.13    6.07 
   2  -2   6  237.37    6.41 
   3   2   6   41.15    1.56 
   3  -2   6   41.19    1.57 
   3   2   6   42.32    1.48 
   3  -2   6   41.39    1.54 
  -3   2  -6   44.89    1.37 
   4   2   6  175.14    4.95 
  -4   2  -6  180.80    4.91 
   4  -2   6  181.14    4.94 
   4   2   6  180.71    4.93 
  -5  -2  -6    9.10    0.76 
   5  -2   6    8.77    0.84 
  -5   2  -6    9.37    0.71 
   5   2   6   10.95    0.70 
   5   2   6    9.77    0.92 
   6  -2   6    3.10    0.71 
   6   2   6    6.22    0.91 
   6   2   6    2.36    0.47 
  -6  -2  -6    5.07    0.66 
  -6   2  -6    2.57    0.57 
  -7   2  -6   29.80    1.48 
   7   2   6   22.52    1.53 
  -7  -2  -6   25.35    1.46 
   7  -2   6   23.10    1.56 
  -8   2  -6   34.42    1.83 
  -8  -2  -6   35.99    1.90 
   8   2   6   34.43    2.12 
   8  -2   6   38.63    2.13 
   9  -2   6   24.83    1.81 
   9   2   6   25.25    1.86 
  10  -2   6    2.69    0.93 
  10   2   6    0.40    0.73 
  11  -2   6    0.44    0.82 
  11   2   6    0.85    0.79 
 -11  -3   6    0.77    0.80 
  11   3  -6    0.29    0.75 
 -11   3   6    0.15    0.72 
  11  -3  -6   -0.11    0.61 
  10   3  -6    6.01    1.20 
 -10  -3   6    7.08    1.31 
 -10   3   6    7.40    1.32 
  10  -3  -6    7.50    1.15 
  -9   3   6    1.87    0.79 
  -9  -3   6    0.99    0.69 
   9   3  -6    1.83    0.73 
   9  -3  -6    2.01    0.71 
   8   3  -6   10.70    1.21 
  -8  -3   6    8.65    1.23 
   8  -3  -6   10.00    1.09 
  -8   3   6   10.18    1.28 
  -7  -3   6    0.71    0.55 
  -7   3   6    1.01    0.53 
   7   3  -6    0.58    0.51 
   7  -3  -6    0.32    0.48 
   6  -3  -6  101.16    3.18 
  -6   3   6  101.93    3.66 
  -6  -3   6   98.55    3.62 
  -6   3   6  105.55    3.00 
   6   3  -6   91.17    3.30 
  -5   3   6   16.52    0.86 
  -5   3   6   18.61    1.17 
   5  -3  -6   15.27    0.92 
   5   3  -6   16.63    1.12 
  -5  -3   6   15.22    1.15 
   4  -3  -6  255.81    6.32 
  -4   3   6  242.73    7.08 
  -4   3   6  254.60    6.71 
  -4  -3   6  259.66    7.15 
   4   3  -6  249.03    6.61 
   3   3  -6   22.05    1.07 
  -3  -3   6   20.14    1.10 
  -3   3   6   23.49    1.14 
   3  -3  -6   23.31    0.86 
  -3   3   6   25.39    1.03 
   2   3  -6   63.02    2.09 
   2  -3  -6   68.12    1.73 
  -2   3   6   67.47    2.12 
  -2  -3   6   67.99    2.22 
  -1   3   6   68.08    2.09 
   1   3  -6   62.95    2.02 
   0   3  -6    1.97    0.33 
   0   3   6    2.59    0.23 
   0   3   6    1.53    0.31 
  -1   3  -6   51.54    1.59 
   1   3   6   51.38    1.71 
   1   3   6   51.52    1.50 
  -1   3  -6   49.81    1.62 
   2  -3   6  118.60    3.34 
   2   3   6  122.06    3.26 
   2   3   6  120.06    3.45 
   3   3   6   33.25    1.35 
   3   3   6   31.59    1.25 
   3  -3   6   33.00    1.37 
   4  -3   6  392.44    9.81 
   4   3   6  395.40    9.82 
  -4   3  -6  385.66   10.13 
   4   3   6  387.26   10.12 
   5   3   6    2.22    0.58 
  -5   3  -6    3.18    0.46 
   5  -3   6    2.51    0.57 
   5   3   6    3.03    0.40 
   6   3   6  413.59   10.76 
  -6   3  -6  414.37   11.08 
   6   3   6  410.38   10.80 
   6  -3   6  422.67   10.73 
   7  -3   6   -0.09    0.45 
  -7   3  -6    0.58    0.41 
  -7  -3  -6    0.26    0.44 
   7   3   6   -0.08    0.51 
   8  -3   6   71.01    3.01 
   8   3   6   72.53    3.16 
  -8  -3  -6   73.72    2.93 
  -8   3  -6   62.57    2.72 
   9  -3   6    0.54    0.65 
   9   3   6    1.46    0.79 
  10  -3   6    5.27    1.16 
  10   3   6    6.15    1.27 
  11  -3   6    1.32    0.85 
  11   3   6    0.78    0.78 
  11   4  -6    0.81    0.86 
 -11  -4   6    0.40    0.84 
 -11   4   6    1.32    0.84 
 -10   4   6   26.90    2.02 
  10  -4  -6   29.47    1.89 
  10   4  -6   27.61    1.99 
 -10  -4   6   27.72    2.13 
   9   4  -6    1.37    0.72 
  -9   4   6    1.54    0.71 
   9  -4  -6    1.02    0.64 
  -9  -4   6    1.58    0.74 
   8   4  -6   80.96    3.29 
  -8   4   6   77.25    3.39 
   8  -4  -6   78.79    2.96 
  -8  -4   6   81.20    3.47 
   7  -4  -6   11.99    0.98 
  -7  -4   6   11.23    1.21 
  -7   4   6   11.89    1.20 
   7   4  -6   12.76    1.20 
   6   4  -6   75.99    2.91 
  -6   4   6   81.97    2.63 
   6  -4  -6   80.00    2.66 
  -6  -4   6   81.17    3.19 
  -6   4   6   82.99    3.16 
   5   4  -6  118.34    3.84 
  -5   4   6  126.31    3.72 
  -5  -4   6  129.33    4.20 
   5  -4  -6  126.02    3.53 
  -5   4   6  125.48    4.13 
  -4  -4   6    3.54    0.65 
  -4   4   6    4.37    0.51 
   4  -4  -6    3.42    0.43 
   4   4  -6    4.01    0.64 
  -4   4   6    3.76    0.63 
   3   4  -6  132.44    3.82 
  -3  -4   6  132.74    4.03 
  -3   4   6  130.22    3.84 
   3  -4  -6  132.47    3.36 
  -2   4   6   39.88    1.54 
   2  -4  -6   41.03    1.12 
   2   4  -6   42.44    1.59 
  -1   4   6   44.36    1.58 
   1   4  -6   38.46    1.52 
   0   4  -6    1.39    0.34 
   0   4   6    0.75    0.27 
   0   4   6    0.65    0.16 
   1   4   6   23.56    1.06 
  -1   4  -6   24.84    1.04 
  -1   4  -6   25.46    1.03 
   1   4   6   25.27    0.90 
   2  -4   6  423.83   10.44 
   2   4   6  429.05   11.05 
   2   4   6  428.48   10.31 
   3   4   6   66.81    2.19 
   3  -4   6   66.55    2.22 
   3   4   6   63.65    2.15 
   4  -4   6  174.07    4.86 
   4   4   6  174.19    4.89 
   4   4   6  172.14    4.86 
   5   4   6   38.46    1.80 
   5   4   6   38.76    1.51 
  -5   4  -6   38.06    1.55 
   5  -4   6   36.91    1.70 
   6  -4   6    2.59    0.68 
  -6   4  -6    3.83    0.63 
   6   4   6    1.77    0.62 
   6   4   6    2.62    0.45 
   7  -4   6    2.07    0.68 
  -7   4  -6    2.31    0.62 
   7   4   6    2.46    0.76 
   8  -4   6   41.78    2.21 
   8   4   6   46.05    2.46 
  -8   4  -6   43.54    2.09 
   9   4   6   -0.45    0.52 
   9  -4   6    0.01    0.52 
  10  -4   6   19.00    1.75 
  10   4   6   20.46    1.90 
  11  -4   6    1.70    0.89 
  11   4   6   -0.22    0.77 
  11   5  -6    4.50    1.21 
 -11   5   6    4.28    1.13 
 -11  -5   6    6.00    1.30 
  10   5  -6    1.41    0.81 
 -10   5   6    1.58    0.85 
 -10  -5   6    0.95    0.78 
  -9   5   6    0.38    0.63 
   9   5  -6   -0.34    0.63 
   9  -5  -6    0.34    0.62 
  -9  -5   6    0.85    0.67 
  -8   5   6   54.06    2.75 
   8   5  -6   53.16    2.63 
  -8  -5   6   53.04    2.74 
   8  -5  -6   57.89    2.37 
   7  -5  -6    3.93    0.71 
  -7  -5   6    3.36    0.85 
   7   5  -6    4.15    0.87 
  -7   5   6    3.96    0.90 
  -6   5   6  153.25    5.08 
  -6  -5   6  161.47    5.20 
   6   5  -6  148.79    4.78 
  -6   5   6  154.78    4.60 
   6  -5  -6  157.96    4.40 
  -5   5   6    3.40    0.59 
   5  -5  -6    5.73    0.59 
  -5   5   6    5.48    0.83 
   5   5  -6    3.86    0.70 
  -5  -5   6    4.13    0.78 
   5   5  -6    4.27    0.40 
  -4  -5   6  228.91    6.75 
   4  -5  -6  241.02    5.86 
   4   5  -6  229.45    6.37 
  -4   5   6  234.14    6.48 
   3   5  -6   93.87    3.02 
   3  -5  -6   98.25    2.53 
  -3   5   6   92.48    3.02 
  -2   5   6    5.55    0.60 
  -2   5   6    5.60    0.31 
   2   5  -6    4.95    0.59 
  -2   5   6    5.47    0.32 
   1   5  -6 1065.69   25.06 
  -1   5   6 1050.77   26.73 
  -1   5   6 1073.62   24.94 
   0   5   6    0.31    0.16 
   0   5   6    0.11    0.22 
   0   5  -6    0.95    0.35 
   1   5   6  770.44   18.06 
  -1   5  -6  767.45   18.28 
   1   5   6  777.25   19.59 
   2   5   6   42.64    1.66 
  -2   5  -6   44.92    1.61 
   2   5   6   43.08    1.54 
  -2   5  -6   44.64    1.57 
   3  -5   6  450.08   11.04 
   3   5   6  444.20   11.61 
   3   5   6  445.39   10.98 
   4   5   6  132.40    3.94 
   4   5   6  133.22    4.00 
   4  -5   6  137.50    3.99 
   5   5   6   15.74    1.20 
   5   5   6   15.54    0.95 
   5  -5   6   16.58    1.17 
  -5   5  -6   15.73    0.98 
  -6   5  -6  153.97    4.73 
   6  -5   6  152.64    4.70 
   6   5   6  157.79    4.48 
   6   5   6  156.20    4.85 
   7  -5   6    0.35    0.58 
   7   5   6    0.04    0.60 
  -7   5  -6    0.27    0.52 
   8   5   6   57.44    2.81 
   8  -5   6   57.05    2.61 
  -8   5  -6   59.41    2.51 
   9   5   6    2.69    1.03 
   9  -5   6    4.99    1.02 
  10  -5   6    7.22    1.21 
  10   5   6    7.15    1.31 
  11  -5   6    8.33    1.38 
  11   5   6    7.63    1.47 
  11   6  -6   -0.06    0.72 
 -11   6   6    1.49    0.79 
  10   6  -6    2.62    0.91 
 -10   6   6    3.15    0.97 
  -9   6   6    0.62    0.68 
   9   6  -6    0.82    0.76 
  -9  -6   6    1.05    0.80 
  -8  -6   6   -0.48    0.55 
  -8   6   6    0.02    0.62 
   8  -6  -6    0.67    0.54 
   8   6  -6    0.41    0.62 
   7  -6  -6    4.37    0.76 
  -7   6   6    5.02    1.03 
   7   6  -6    4.01    0.91 
  -7  -6   6    5.82    1.06 
  -6   6   6    7.94    0.82 
   6  -6  -6    8.50    0.78 
  -6  -6   6    8.78    1.07 
   6   6  -6    9.37    1.03 
  -6   6   6   10.24    1.12 
  -5   6   6   74.37    3.05 
   5   6  -6   81.23    2.98 
   5   6  -6   82.68    2.51 
  -5   6   6   78.01    2.85 
   5  -6  -6   84.83    2.54 
  -4   6   6   29.05    1.47 
   4  -6  -6   30.44    1.16 
   4   6  -6   30.13    1.58 
  -3   6   6  373.78   10.13 
   3  -6  -6  369.76    8.99 
   3   6  -6  389.25    9.69 
   2   6  -6    1.82    0.47 
  -2   6   6    2.37    0.48 
  -2   6   6    3.11    0.26 
  -1   6   6  185.70    4.43 
   1   6  -6  179.85    5.00 
  -1   6   6  182.64    5.29 
   0   6   6    0.15    0.26 
   0   6  -6    0.14    0.31 
   1   6   6    0.02    0.25 
  -1   6  -6    1.88    0.39 
   1   6   6   -0.04    0.22 
   2   6   6   11.19    0.80 
  -2   6  -6   10.02    0.69 
   2   6   6    9.79    0.70 
  -2   6  -6    9.48    0.71 
   3  -6   6    9.93    0.85 
   3   6   6   10.28    0.86 
   3   6   6    9.70    0.80 
   4  -6   6   20.43    1.21 
   4   6   6   19.65    1.18 
   4   6   6   21.03    1.11 
   5  -6   6   37.58    1.77 
   5   6   6   29.51    1.72 
   5   6   6   33.86    1.55 
   6   6   6   17.88    1.36 
   6  -6   6   13.63    1.14 
  -6   6  -6   16.60    1.11 
   6   6   6   15.61    0.95 
  -7   6  -6    0.88    0.62 
   7  -6   6   -0.14    0.55 
   7   6   6   -0.32    0.63 
   8   6   6   -0.22    0.61 
   8  -6   6    0.90    0.61 
  -8   6  -6    0.61    0.45 
   9  -6   6    5.60    1.10 
   9   6   6    5.43    1.21 
  10  -6   6   -0.27    0.61 
  10   6   6    0.30    0.77 
  11   6   6    1.06    0.90 
  11  -6   6    0.95    0.86 
  11   7  -6   -0.25    0.84 
 -11   7   6    2.41    0.89 
 -10   7   6    1.26    0.75 
  10   7  -6    1.46    0.79 
   9   7  -6   -0.02    0.67 
  -9   7   6    0.84    0.79 
  -8   7   6    0.53    0.71 
   8   7  -6    1.09    0.67 
  -7   7   6    9.53    1.23 
   7  -7  -6    8.28    0.95 
   7   7  -6    7.78    1.14 
   6  -7  -6   45.12    1.78 
   6   7  -6   45.32    2.23 
  -6   7   6   46.24    2.04 
  -6   7   6   41.32    2.21 
   5   7  -6   22.37    1.13 
  -5   7   6   21.73    1.39 
   5   7  -6   22.42    1.51 
   5  -7  -6   22.02    1.12 
   4   7  -6  144.59    4.23 
  -4   7   6  144.61    4.49 
   4  -7  -6  140.66    3.77 
   4   7  -6  140.84    4.42 
  -3   7   6   56.71    1.64 
  -3   7   6   57.28    2.29 
  -3   7   6   56.93    1.67 
   3   7  -6   57.89    2.31 
   2   7  -6  125.71    3.85 
  -2   7   6  123.21    3.20 
  -2   7   6  131.14    4.05 
  -1   7   6   29.21    1.49 
  -1   7   6   24.82    0.93 
   1   7  -6   26.75    1.40 
   0   7  -6   14.40    0.97 
   0   7   6   16.36    0.76 
   0   7   6   18.05    1.09 
   1   7   6   58.89    2.29 
  -1   7  -6   59.30    2.11 
   1   7   6   58.49    1.90 
   2   7   6   35.09    1.46 
   2   7   6   36.13    1.67 
  -2   7  -6   39.66    1.56 
  -2   7  -6   39.88    1.59 
   3   7   6   15.43    1.11 
   3   7   6   16.92    1.15 
  -3   7  -6   17.14    1.08 
  -3   7  -6   18.18    1.07 
   4  -7   6  118.49    3.70 
   4   7   6  116.44    3.69 
   4   7   6  120.21    3.77 
   5   7   6    4.31    0.79 
   5  -7   6    3.77    0.72 
   5   7   6    4.17    0.63 
   6   7   6  131.80    4.36 
   6   7   6  127.99    3.97 
   6  -7   6  129.57    4.17 
  -6   7  -6  124.78    4.18 
   7   7   6    2.19    0.85 
  -7   7  -6    2.43    0.68 
   7  -7   6    2.57    0.78 
  -8   7  -6   29.09    1.71 
   8   7   6   26.76    1.91 
   8  -7   6   23.48    1.63 
   9  -7   6    0.85    0.73 
   9   7   6    2.22    0.88 
  10  -7   6    1.08    0.78 
  10   7   6    0.41    0.78 
  10   8  -6   32.48    2.37 
 -10   8   6   28.44    2.22 
   9   8  -6    0.75    0.71 
  -9   8   6    0.45    0.73 
   8   8  -6  130.08    4.89 
  -8   8   6  139.72    5.22 
  -7   8   6    7.78    1.22 
   7   8  -6    5.51    1.11 
  -7   8   6    6.19    0.94 
  -6   8   6   99.79    3.60 
  -6   8   6  100.60    3.94 
   6  -8  -6   99.07    3.12 
   6   8  -6   98.59    3.74 
   5   8  -6    6.46    1.01 
   5   8  -6    8.10    0.73 
  -5   8   6    6.62    0.88 
   5  -8  -6    7.16    0.66 
   4   8  -6    6.95    0.71 
  -4   8   6    7.67    0.63 
  -4   8   6    6.37    0.83 
  -4   8   6    6.80    0.58 
   4   8  -6    7.01    0.90 
  -3   8   6    2.29    0.66 
  -3   8   6    3.19    0.38 
   3   8  -6    2.15    0.66 
  -2   8   6    3.29    0.65 
  -2   8   6    4.32    0.38 
   2   8  -6    3.97    0.69 
  -1   8   6   14.86    0.73 
   1   8  -6   17.78    1.18 
  -1   8   6   15.33    1.12 
   0   8   6   45.70    2.00 
   0   8  -6   45.51    1.89 
   0   8   6   46.93    1.53 
   1   8   6   10.28    0.92 
  -1   8  -6    8.46    0.81 
   1   8   6   10.77    0.73 
  -2   8  -6  431.11   10.80 
   2   8   6  433.60   10.67 
   2   8   6  433.46   11.63 
   3   8   6   30.06    1.45 
  -3   8  -6   29.74    1.44 
   3   8   6   29.78    1.53 
  -3   8  -6   28.78    1.38 
   4   8   6  303.81    8.20 
  -4   8  -6  307.06    8.10 
  -4   8  -6  308.46    7.94 
   4   8   6  318.71    8.62 
   5   8   6    1.85    0.62 
   5  -8   6    1.35    0.58 
   6  -8   6    7.05    0.96 
   6   8   6    6.47    0.99 
   6   8   6    5.37    0.73 
   7  -8   6   11.99    1.21 
   7   8   6   11.80    1.32 
  -7   8  -6   13.60    1.19 
   8  -8   6   14.13    1.37 
   8   8   6   17.95    1.68 
   9   8   6    0.65    0.76 
   9  -8   6    0.33    0.65 
  10  -8   6   15.59    1.59 
  10   8   6   13.00    1.77 
 -10   9   6    1.47    0.89 
  10   9  -6    2.89    1.09 
   9   9  -6    1.47    0.87 
  -9   9   6    2.16    0.93 
   8   9  -6   21.90    1.88 
  -8   9   6   21.62    1.91 
  -7   9   6   -0.13    0.51 
  -7   9   6    0.19    0.62 
   7   9  -6    0.20    0.66 
   6   9  -6  240.76    7.25 
  -6   9   6  238.38    7.24 
  -5   9   6    7.67    0.95 
   5   9  -6    8.47    0.81 
   5   9  -6   10.49    1.20 
   4   9  -6  422.92   10.63 
  -4   9   6  396.42    9.45 
   4   9  -6  401.83   10.75 
  -4   9   6  370.47   10.99 
  -4   9   6  397.29    9.63 
   3   9  -6  122.63    4.22 
  -3   9   6  139.82    3.58 
  -3   9   6  141.96    4.58 
  -2   9   6   52.32    2.33 
  -2   9   6   51.54    1.65 
   2   9  -6   55.39    2.29 
  -1   9   6   48.03    1.61 
  -1   9   6   50.97    2.24 
   1   9  -6   54.32    2.16 
   0   9  -6   22.81    1.28 
   0   9   6   25.04    1.07 
   0   9   6   23.86    1.43 
   1   9   6    5.95    0.79 
  -1   9  -6    7.60    0.79 
   1   9   6    7.40    0.64 
   2   9   6   12.21    1.03 
  -2   9  -6   10.92    0.92 
   2   9   6   11.63    0.90 
   3   9   6   10.64    0.93 
  -3   9  -6    9.29    0.86 
  -3   9  -6    9.90    0.90 
   3   9   6    9.55    0.93 
  -4   9  -6  302.99    7.94 
   4   9   6  293.03    8.05 
  -4   9  -6  300.78    7.78 
   4   9   6  298.98    8.45 
   5   9   6   10.50    0.96 
   5   9   6    9.99    1.07 
   6   9   6  424.00   11.22 
   6  -9   6  409.81   10.94 
   7  -9   6    1.23    0.63 
   7   9   6    1.81    0.81 
  -7   9  -6    1.50    0.56 
   8   9   6  123.35    4.76 
   8  -9   6  128.72    4.50 
   9   9   6    4.49    1.12 
   9  -9   6    3.81    0.92 
  10   9   6    4.47    1.33 
  10  -9   6    7.09    1.25 
  10  10  -6   23.06    2.26 
 -10  10   6   24.41    2.12 
  -9  10   6    3.14    1.07 
   9  10  -6    1.94    0.94 
  -8  10   6   79.76    3.90 
   8  10  -6   87.96    3.91 
   7  10  -6    3.34    0.93 
  -7  10   6    2.01    0.76 
  -7  10   6    1.72    0.80 
  -6  10   6   59.79    2.75 
   6  10  -6   58.89    2.89 
  -5  10   6   -0.33    0.50 
   5  10  -6   -0.01    0.58 
   5  10  -6   -0.86    0.34 
   4  10  -6    2.98    0.63 
  -4  10   6    4.60    0.87 
   4  10  -6    3.02    0.78 
  -3  10   6   35.77    1.35 
  -3  10   6   35.25    1.97 
   3  10  -6   36.38    1.94 
   3  10  -6   37.50    1.85 
  -2  10   6   58.64    2.56 
  -2  10   6   59.06    1.82 
   2  10  -6   50.66    2.32 
   1  10  -6   87.39    3.01 
  -1  10   6   80.77    3.19 
  -1  10   6   78.76    2.41 
   0  10   6   12.89    0.85 
   0  10  -6   12.96    1.03 
   0  10   6    9.88    1.05 
  -1  10  -6   21.29    1.33 
   1  10   6   22.53    1.43 
   1  10   6   22.63    1.17 
   2  10   6  272.18    7.98 
   2  10   6  278.88    7.25 
  -2  10  -6  273.47    7.36 
   3  10   6   22.43    1.38 
   3  10   6   20.78    1.44 
  -3  10  -6   22.73    1.35 
   4  10   6  193.03    5.90 
   4  10   6  192.03    5.61 
  -4  10  -6  185.52    5.33 
  -4  10  -6  188.13    5.45 
   5  10   6   13.95    1.25 
  -5  10  -6   11.20    1.07 
   5  10   6   12.57    1.13 
  -5  10  -6   13.43    1.08 
  -6  10  -6    2.23    0.74 
   6  10   6    5.34    1.00 
  -6  10  -6    2.88    0.74 
   7  10   6   11.78    1.38 
   7 -10   6   12.58    1.28 
   8  10   6   23.00    1.94 
   8 -10   6   25.53    1.80 
   9 -10   6    1.44    0.78 
   9  10   6    0.89    0.89 
  10  10   6   12.49    1.78 
  10 -10   6   14.71    1.60 
  -9  11   6    4.03    1.19 
   9  11  -6    4.02    1.21 
  -8  11   6    1.73    0.77 
   8  11  -6    0.84    0.87 
  -7  11   6    1.53    0.82 
  -7  11   6    1.02    0.70 
   7  11  -6    1.36    0.81 
   6  11  -6   24.97    1.93 
  -6  11   6   28.17    1.91 
   5  11  -6    1.32    0.56 
  -5  11   6    0.98    0.66 
   5  11  -6    0.87    0.65 
   4  11  -6   40.72    2.19 
  -4  11   6   42.82    2.31 
   4  11  -6   44.31    2.10 
  -3  11   6    4.31    0.89 
   3  11  -6    4.53    0.88 
   3  11  -6    3.23    0.71 
  -2  11   6    0.14    0.51 
   2  11  -6    0.74    0.58 
   1  11  -6   78.59    2.94 
  -1  11   6   77.51    2.40 
  -1  11   6   76.39    3.20 
   0  11   6   57.53    2.63 
   0  11   6   58.69    2.03 
   0  11  -6   61.57    2.45 
  -1  11  -6  116.17    3.78 
   1  11   6  116.40    3.52 
   1  11   6  115.10    4.15 
   2  11   6    8.76    1.00 
   2  11   6    9.37    0.87 
  -2  11  -6    8.96    0.95 
   3  11   6   47.06    2.10 
   3  11   6   49.15    2.35 
  -3  11  -6   49.80    2.14 
   4  11   6   51.46    2.30 
  -4  11  -6   49.35    2.19 
   4  11   6   54.06    2.45 
   5  11   6    0.62    0.54 
   5  11   6    1.39    0.67 
  -5  11  -6    0.78    0.53 
  -5  11  -6    1.40    0.63 
  -6  11  -6   83.64    3.20 
  -6  11  -6   85.35    3.13 
   6  11   6   83.15    3.45 
   7  11   6    5.79    1.15 
  -7  11  -6    5.55    0.91 
  -7  11  -6    5.42    0.95 
   8  11   6   24.68    2.02 
   9  11   6   16.64    1.91 
   9 -11   6   15.17    1.56 
   9  12  -6    1.72    1.05 
  -9  12   6    0.52    0.74 
  -8  12   6    3.71    1.09 
   8  12  -6    2.54    0.97 
  -7  12   6    0.59    0.70 
   7  12  -6   -0.02    0.71 
   6  12  -6    6.43    1.22 
  -6  12   6    5.15    1.04 
   5  12  -6   29.20    2.01 
  -5  12   6   31.06    2.05 
  -4  12   6    0.54    0.65 
   4  12  -6    1.47    0.71 
   4  12  -6    0.54    0.47 
   3  12  -6  118.68    4.06 
   3  12  -6  105.23    3.98 
  -3  12   6  110.75    4.28 
   2  12  -6    7.69    1.01 
  -2  12   6   10.97    1.25 
   2  12  -6    8.85    1.02 
  -1  12   6  104.41    3.98 
   1  12  -6   97.69    3.51 
   0  12  -6    0.47    0.47 
   0  12   6   -0.36    0.36 
   0  12   6   -0.48    0.39 
  -1  12  -6    7.90    0.91 
   1  12   6    3.52    0.81 
   1  12   6    5.39    0.70 
  -2  12  -6   13.53    1.14 
   2  12   6   13.53    1.10 
   2  12   6   12.02    1.21 
   3  12   6    8.74    1.11 
   3  12   6   10.39    1.05 
  -3  12  -6   11.08    1.09 
  -4  12  -6   28.21    1.64 
   4  12   6   31.98    1.80 
   4  12   6   27.07    1.81 
   5  12   6    4.08    1.00 
   5  12   6    4.15    0.93 
  -5  12  -6    4.63    0.87 
  -5  12  -6    4.53    0.89 
  -6  12  -6    3.68    0.81 
  -6  12  -6    3.75    0.84 
   6  12   6    4.56    1.02 
   7  12   6    2.54    1.00 
  -7  12  -6    1.48    0.78 
  -7  12  -6    3.79    0.89 
  -8  12  -6    0.35    0.59 
   8  12   6    0.00    0.69 
  -8  12  -6    0.18    0.48 
   9  12   6    4.70    1.22 
  -9  13   6    3.44    1.11 
   9  13  -6    1.84    1.14 
   8  13  -6    7.08    1.47 
  -8  13   6    6.20    1.33 
  -7  13   6    0.39    0.76 
   7  13  -6   -0.01    0.83 
   6  13  -6    6.38    1.26 
  -6  13   6    4.12    1.07 
   5  13  -6    1.29    0.81 
  -5  13   6   -0.55    0.63 
  -4  13   6    4.12    0.99 
   4  13  -6    4.05    0.83 
   4  13  -6    5.32    1.04 
   3  13  -6    9.01    1.08 
   3  13  -6    8.34    1.14 
  -3  13   6   10.27    1.28 
   2  13  -6    1.31    0.58 
  -2  13   6    0.85    0.60 
   2  13  -6    1.02    0.60 
   1  13  -6  194.05    5.78 
  -1  13   6  190.41    6.40 
   0  13   6   11.91    1.28 
   0  13  -6   11.29    1.12 
   1  13   6  229.34    6.21 
   1  13   6  222.59    7.15 
  -1  13  -6  224.08    6.46 
   2  13   6   35.85    1.79 
  -2  13  -6   28.77    1.74 
   2  13   6   34.36    2.07 
  -3  13  -6   95.98    3.45 
   3  13   6   91.85    3.80 
   3  13   6   97.20    3.44 
   4  13   6    9.72    1.14 
  -4  13  -6   13.55    1.26 
   4  13   6   11.32    1.31 
   5  13   6    1.92    0.83 
   5  13   6    2.88    0.90 
  -5  13  -6    2.57    0.79 
  -6  13  -6   11.79    1.25 
  -6  13  -6   13.54    1.31 
   6  13   6   13.36    1.44 
  -7  13  -6    0.25    0.56 
   7  13   6    0.90    0.77 
  -7  13  -6    0.79    0.67 
  -7  13  -6    0.18    0.62 
   8  13   6    5.39    1.26 
   8  14  -6    2.98    1.08 
  -8  14   6    3.86    1.17 
   7  14  -6   -0.01    0.90 
  -7  14   6    0.32    0.76 
  -6  14   6    1.56    0.86 
   6  14  -6    2.22    0.93 
   5  14  -6   24.00    1.98 
  -5  14   6   27.00    2.08 
   4  14  -6    2.43    0.89 
   4  14  -6    2.85    0.80 
  -4  14   6    2.96    0.97 
   3  14  -6   80.58    3.29 
  -3  14   6   75.89    3.57 
   3  14  -6   75.47    3.30 
  -2  14   6    0.09    0.72 
   2  14  -6   -0.58    0.55 
   2  14  -6    0.10    0.61 
  -1  14   6   56.39    2.88 
   1  14  -6   55.49    2.53 
   1  14  -6   54.51    2.71 
   0  14  -6    3.89    0.86 
   0  14   6    4.62    1.04 
   0  14  -6    3.44    0.92 
   1  14   6    0.39    0.64 
  -1  14  -6    0.43    0.63 
   2  14   6   12.30    1.14 
   2  14   6   10.00    1.25 
  -2  14  -6   11.20    1.17 
   3  14   6   12.63    1.38 
  -3  14  -6   13.76    1.26 
   3  14   6   15.87    1.30 
   4  14   6   12.84    1.29 
   4  14   6   12.41    1.39 
  -4  14  -6   14.38    1.30 
  -5  14  -6    6.51    0.97 
   5  14   6    5.93    1.07 
   5  14   6    5.69    1.09 
   6  14   6    0.73    0.73 
  -6  14  -6    0.76    0.70 
  -7  14  -6    0.67    0.71 
   7  14   6    0.54    0.83 
   8  14   6    1.65    1.04 
   7  15  -6    1.03    0.85 
  -7  15   6    0.82    0.82 
  -6  15   6    8.19    1.40 
   6  15  -6    5.83    1.27 
  -5  15   6    1.41    0.89 
   5  15  -6    1.11    0.87 
   4  15  -6    1.34    0.92 
   4  15  -6    2.56    0.89 
  -4  15   6    2.51    1.01 
  -3  15   6   -0.95    0.65 
   3  15  -6   -0.36    0.56 
   3  15  -6    0.10    0.68 
  -2  15   6    2.27    0.95 
   2  15  -6    2.44    0.85 
   2  15  -6    2.12    0.83 
   1  15  -6   11.98    1.24 
  -1  15   6   10.93    1.43 
   1  15  -6   11.93    1.35 
   0  15  -6    8.11    1.24 
   0  15   6    8.21    1.31 
   0  15  -6   12.69    1.22 
  -1  15  -6   11.25    1.35 
   1  15   6   11.85    1.44 
  -1  15  -6   12.29    1.18 
   2  15   6    0.87    0.66 
  -2  15  -6    1.04    0.60 
  -2  15  -6    0.74    0.61 
   3  15   6    0.62    0.66 
  -3  15  -6    0.44    0.61 
  -3  15  -6    0.70    0.62 
   3  15   6    1.54    0.71 
  -4  15  -6    1.47    0.72 
   4  15   6    0.17    0.66 
   4  15   6    1.39    0.77 
  -4  15  -6    1.80    0.83 
   5  15   6    2.75    0.92 
   5  15   6    4.57    1.02 
  -5  15  -6    3.23    0.99 
   6  15   6    7.59    1.34 
  -6  15  -6    8.16    1.36 
  -7  15  -6    4.62    1.14 
   7  15   6    3.80    1.10 
  -7  16   6    2.19    1.06 
   7  16  -6    0.85    0.76 
  -6  16   6    0.11    0.81 
   6  16  -6   -0.25    0.84 
   5  16  -6    3.48    1.06 
  -5  16   6    2.17    0.99 
  -4  16   6   -0.11    0.72 
   4  16  -6    1.15    0.82 
   4  16  -6    0.00    0.59 
   3  16  -6   15.88    1.55 
   3  16  -6   15.92    1.54 
  -3  16   6   13.23    1.65 
   2  16  -6    0.97    0.78 
   2  16  -6    2.30    0.87 
  -2  16   6    2.62    0.99 
  -1  16   6   16.40    1.67 
   1  16  -6   13.12    1.37 
   1  16  -6   13.07    1.49 
   0  16   6    0.68    0.70 
   0  16  -6   -0.08    0.65 
   0  16  -6    0.31    0.66 
  -1  16  -6    4.65    0.98 
  -1  16  -6    4.86    1.09 
   1  16   6    5.15    1.09 
   2  16   6    3.91    1.09 
  -2  16  -6    6.36    1.05 
  -2  16  -6    3.34    1.08 
   3  16   6    0.62    0.78 
  -3  16  -6    0.00    0.72 
  -3  16  -6    1.65    0.77 
  -4  16  -6    8.14    1.37 
   4  16   6    9.28    1.40 
   5  16   6   -0.14    0.73 
  -5  16  -6    0.06    0.64 
   5  16   6   -0.28    0.65 
  -6  16  -6    0.92    0.82 
   6  16   6    2.05    0.95 
  -7  16  -6   -0.94    0.67 
   7  16   6    0.77    0.87 
  -6  17   6    1.48    0.98 
   6  17  -6    2.99    1.13 
  -5  17   6    0.96    0.88 
   5  17  -6    0.18    0.78 
   4  17  -6    2.03    0.88 
   4  17  -6    1.84    0.90 
  -4  17   6    1.09    0.97 
  -3  17   6    8.20    1.44 
   3  17  -6    8.30    1.29 
   3  17  -6    6.87    1.19 
   2  17  -6    2.85    0.88 
  -2  17   6    2.94    1.07 
   2  17  -6    2.83    0.91 
   1  17  -6   49.90    2.84 
  -1  17   6   51.04    2.97 
   1  17  -6   51.14    2.57 
   0  17   6    5.41    1.23 
   0  17  -6    7.32    1.27 
   0  17  -6    8.16    1.16 
   1  17   6   59.66    3.26 
  -1  17  -6   62.80    3.26 
  -1  17  -6   61.33    2.80 
  -2  17  -6    3.52    0.98 
   2  17   6    3.57    1.03 
  -2  17  -6    3.13    0.89 
  -3  17  -6   26.59    2.14 
   3  17   6   23.72    1.99 
  -4  17  -6    2.17    0.91 
   4  17   6    1.64    0.91 
  -5  17  -6    5.29    1.22 
  -6  17  -6    0.60    0.85 
   5  18  -6   11.41    1.59 
  -5  18   6   10.61    1.65 
  -4  18   6    2.73    1.09 
   4  18  -6    2.53    1.09 
   4  18  -6    3.85    1.00 
   3  18  -6   41.88    2.58 
  -3  18   6   42.01    2.86 
   3  18  -6   38.58    2.41 
  -2  18   6    0.53    0.87 
   2  18  -6    0.14    0.69 
   2  18  -6    0.41    0.71 
  -1  18   6   21.30    2.09 
   1  18  -6   24.25    2.02 
   1  18  -6   24.70    1.82 
   0  18  -6   -0.28    0.60 
   0  18   6   -0.63    0.67 
   0  18  -6   -0.19    0.58 
  -1  18  -6    0.40    0.65 
   1  18   6   -0.14    0.66 
  -2  18  -6   -1.52    0.51 
   2  18   6    0.98    0.76 
  -3  18  -6    6.96    1.41 
   3  18   6    7.95    1.41 
   4  18   6   -0.24    0.75 
  -4  18  -6    0.05    0.82 
  -5  18  -6    2.25    1.04 
   3  19  -6    0.51    0.80 
  -3  19   6    1.10    0.85 
   3  19  -6   -0.40    0.80 
   2  19  -6   -0.66    0.68 
  -2  19   6    1.58    0.96 
   2  19  -6    1.26    0.80 
   1  19  -6   21.54    1.85 
  -1  19   6   21.90    2.17 
   1  19  -6   24.24    2.10 
   0  19  -6    1.79    0.97 
   0  19   6    0.91    0.79 
   1  19   6   38.74    2.73 
  -1  19  -6   37.06    2.68 
  -2  19  -6    0.12    0.78 
   2  19   6    1.15    0.93 
   3  19   6    8.05    1.48 
  -3  19  -6    5.62    1.30 
  -1  20   6    9.72    1.67 
   1  20  -6   10.53    1.55 
   0  20  -6    0.57    0.79 
   0  20   6    0.95    0.95 
 -11   0   7    2.64    0.93 
  11   0  -7    1.02    0.79 
 -10   0   7   -1.03    0.58 
  10   0  -7    0.30    0.60 
   9   0  -7   -1.12    0.58 
  -9   0   7    0.16    0.73 
  -8   0   7   -0.99    0.37 
   8   0  -7   -0.74    0.39 
  -7   0   7    1.19    0.67 
   7   0  -7   -0.01    0.57 
   6   0  -7   -0.12    0.35 
  -6   0   7   -0.49    0.40 
   5   0  -7   -0.33    0.43 
  -4   0   7   -0.27    0.15 
  -4   0   7   -0.58    0.33 
   4   0  -7   -0.27    0.25 
   3   0  -7   -0.14    0.23 
  -3   0   7   -0.41    0.19 
   2   0  -7    0.22    0.17 
  -2   0   7    0.40    0.18 
  -2   0   7    0.31    0.20 
   1   0  -7    1.24    0.23 
  -1   0   7    0.11    0.17 
   0   0  -7   -0.40    0.15 
   0   0   7   -0.20    0.13 
   0   0   7   -0.35    0.18 
   0   0  -7   -0.15    0.16 
   1   0   7   -1.35    0.26 
   2   0   7   -0.26    0.21 
   2   0   7   -0.31    0.20 
   3   0   7   -0.19    0.23 
   3   0   7    0.05    0.27 
  -3   0  -7    0.40    0.19 
  -4   0  -7    0.23    0.19 
   4   0   7    0.30    0.29 
   4   0   7    0.10    0.20 
   5   0   7    0.93    0.38 
   5   0   7    0.58    0.55 
  -5   0  -7    0.43    0.38 
  -6   0  -7    0.05    0.30 
   6   0   7   -0.02    0.38 
   6   0   7    0.00    0.25 
  -7   0  -7    0.22    0.49 
   7   0   7   -0.19    0.52 
  -8   0  -7   -0.25    0.47 
   8   0   7   -0.07    0.54 
   9   0   7    0.95    0.82 
  10   0   7   -1.00    0.55 
  11   0   7    1.49    0.90 
 -11  -1   7    5.86    1.23 
 -11   1   7    5.21    1.15 
  11   1  -7    3.88    0.99 
  11  -1  -7    2.46    0.94 
  10   1  -7   -1.41    0.52 
  10  -1  -7    1.71    0.69 
 -10  -1   7    0.99    0.74 
 -10   1   7    0.42    0.75 
  -9   1   7    2.54    0.82 
   9   1  -7    2.38    0.83 
  -9  -1   7    2.87    0.97 
   9  -1  -7    1.65    0.82 
  -8  -1   7   22.10    1.64 
   8  -1  -7   20.98    1.42 
  -8   1   7   22.14    1.63 
   8   1  -7   19.67    1.41 
   7  -1  -7   -0.83    0.48 
   7   1  -7    0.37    0.54 
  -7   1   7    0.92    0.56 
  -7  -1   7   -0.03    0.59 
   6  -1  -7  234.88    6.16 
  -6  -1   7  221.80    6.78 
  -6   1   7  207.59    6.71 
   6   1  -7  242.61    6.29 
   5  -1  -7    1.21    0.45 
   5   1  -7    1.26    0.47 
  -5   1   7    1.10    0.27 
  -5   1   7    2.22    0.59 
  -5  -1   7    0.78    0.56 
  -4   1   7  782.54   20.47 
  -4  -1   7  783.61   19.86 
  -4  -1   7  807.04   20.50 
  -4   1   7  798.20   19.88 
   4   1  -7  809.15   18.93 
   4  -1  -7  800.58   18.80 
   3   1  -7    4.32    0.46 
  -3  -1   7    5.18    0.57 
  -3  -1   7    4.43    0.37 
  -3   1   7    4.46    0.53 
  -3   1   7    4.50    0.39 
   3  -1  -7    4.11    0.39 
   2   1  -7  585.49   13.85 
  -2  -1   7  587.50   14.70 
   2  -1  -7  596.89   13.71 
  -2   1   7  583.43   14.94 
  -2   1   7  583.69   14.72 
  -2  -1   7  575.64   14.94 
   1   1  -7   34.09    1.15 
  -1   1   7   30.67    1.13 
  -1   1   7   30.82    1.14 
  -1  -1   7   32.20    1.14 
   1  -1  -7   34.30    0.99 
  -1  -1   7   31.85    1.14 
   0  -1   7    4.90    0.31 
   0  -1   7    5.48    0.44 
   0   1   7    4.53    0.40 
   0   1  -7    6.59    0.42 
   0   1  -7    5.50    0.41 
   0   1   7    5.39    0.37 
  -1   1  -7    5.97    0.26 
   1  -1   7    5.56    0.51 
   1  -1   7    6.70    0.54 
   1   1   7    6.77    0.52 
   1   1   7    6.14    0.46 
  -2   1  -7    5.26    0.27 
   2   1   7    5.37    0.49 
   2  -1   7    7.75    0.56 
   2   1   7    6.03    0.50 
   2  -1   7    8.15    0.54 
   3   1   7   33.32    1.28 
  -3   1  -7   33.53    1.07 
   3   1   7   30.55    1.29 
   3  -1   7   31.17    1.29 
   3  -1   7   31.23    1.31 
   4  -1   7   34.59    1.51 
   4   1   7   32.99    1.35 
   4   1   7   34.16    1.53 
   4  -1   7   34.47    1.39 
  -4   1  -7   35.58    1.26 
  -4  -1  -7   36.54    1.29 
   5  -1   7   19.93    1.22 
   5   1   7   18.00    0.99 
   5   1   7   21.04    1.29 
   5  -1   7   20.69    1.09 
  -5  -1  -7   19.32    1.03 
  -5   1  -7   19.59    1.00 
   6   1   7   52.88    1.86 
  -6   1  -7   52.43    1.94 
  -6  -1  -7   52.83    1.97 
   6   1   7   46.99    2.16 
   6  -1   7   46.16    2.08 
   7   1   7    0.21    0.53 
  -7  -1  -7    0.75    0.52 
  -7   1  -7    1.13    0.53 
   7  -1   7    1.12    0.62 
  -8  -1  -7   38.33    1.90 
   8  -1   7   36.31    2.07 
   8   1   7   38.08    2.16 
  -8   1  -7   35.33    1.82 
   9  -1   7    5.57    1.10 
   9   1   7    8.31    1.22 
  10  -1   7    1.33    0.83 
  10   1   7    2.37    0.95 
  11   1   7    1.88    0.92 
  11  -1   7    0.59    0.91 
 -11  -2   7    0.45    0.79 
 -11   2   7    2.58    0.95 
  11   2  -7    2.37    0.93 
  11  -2  -7    0.67    0.72 
  10   2  -7   10.68    1.33 
  10  -2  -7    8.34    1.15 
 -10  -2   7   11.73    1.50 
 -10   2   7    9.37    1.39 
   9  -2  -7    7.37    1.03 
   9   2  -7    6.82    1.07 
  -9  -2   7    5.72    1.18 
  -9   2   7    8.60    1.23 
   8  -2  -7   90.20    3.22 
   8   2  -7   85.78    3.33 
  -8  -2   7   87.93    3.65 
  -8   2   7   89.23    3.64 
  -7  -2   7    0.90    0.64 
   7  -2  -7    1.53    0.61 
  -7   2   7    2.61    0.69 
   7   2  -7    2.40    0.64 
  -6  -2   7  103.89    3.72 
  -6   2   7  104.30    2.96 
   6   2  -7  102.11    3.42 
   6  -2  -7  102.37    3.23 
  -6   2   7  105.92    3.76 
  -5   2   7    3.44    0.63 
  -5   2   7    3.94    0.40 
  -5  -2   7    3.43    0.70 
   5   2  -7    3.70    0.59 
   5  -2  -7    3.58    0.53 
   4  -2  -7   66.51    2.06 
  -4   2   7   63.43    2.44 
  -4  -2   7   66.44    2.49 
  -4   2   7   68.58    2.09 
   4   2  -7   70.24    2.29 
  -3  -2   7    0.11    0.23 
  -3  -2   7    0.02    0.15 
   3   2  -7    0.45    0.26 
   3  -2  -7    1.20    0.24 
  -3   2   7    0.61    0.29 
  -3   2   7    0.13    0.19 
   2   2  -7  947.15   21.91 
   2  -2  -7  963.07   21.68 
  -2   2   7  927.08   23.53 
  -2   2   7  929.81   23.31 
  -2  -2   7  903.52   23.23 
  -2  -2   7  932.40   23.55 
  -1  -2   7   70.94    2.14 
   1  -2  -7   72.44    1.80 
  -1   2   7   71.59    2.18 
  -1  -2   7   70.97    2.16 
   1   2  -7   71.35    2.13 
   0   2   7 1021.51   25.35 
   0  -2   7 1008.39   25.34 
   0   2   7 1031.76   23.84 
   0   2  -7 1002.77   23.68 
   1  -2   7    3.09    0.39 
   1   2   7    2.86    0.31 
   1  -2   7    3.01    0.37 
   2   2   7   35.32    1.28 
   2   2   7   35.82    1.33 
   2  -2   7   33.39    1.33 
   2  -2   7   35.17    1.34 
   3   2   7    0.24    0.22 
   3  -2   7    0.71    0.33 
  -3   2  -7    1.11    0.22 
   3  -2   7    0.16    0.24 
   3   2   7    2.58    0.43 
   4  -2   7   15.64    1.02 
  -4   2  -7   16.14    0.79 
   4  -2   7   15.35    0.89 
   4   2   7   13.36    0.98 
   5  -2   7   71.14    2.60 
   5   2   7   73.57    2.64 
  -5  -2  -7   71.91    2.42 
   5   2   7   70.01    2.34 
  -5   2  -7   72.79    2.36 
  -6  -2  -7    4.49    0.63 
   6   2   7    2.92    0.51 
   6  -2   7    3.19    0.67 
  -6   2  -7    2.63    0.56 
   6   2   7    1.68    0.73 
   7  -2   7   40.00    2.01 
   7   2   7   37.84    2.02 
  -7  -2  -7   40.13    1.86 
  -7   2  -7   41.73    1.82 
   8   2   7   58.24    2.74 
  -8   2  -7   53.25    2.41 
   8  -2   7   61.72    2.74 
  -8  -2  -7   60.53    2.53 
   9   2   7    7.76    1.22 
   9  -2   7    5.67    1.09 
  10  -2   7   64.44    3.11 
  10   2   7   59.09    3.11 
  11   2   7    0.89    0.87 
  11  -2   7    0.26    0.78 
 -11  -3   7    1.01    0.86 
 -11   3   7    0.77    0.73 
  11   3  -7    0.79    0.81 
 -10   3   7    2.31    0.85 
  10   3  -7    1.11    0.75 
  10  -3  -7    0.52    0.73 
 -10  -3   7    1.97    0.89 
   9   3  -7    0.82    0.62 
   9  -3  -7    0.44    0.56 
  -9   3   7    1.09    0.65 
  -9  -3   7    0.07    0.63 
  -8  -3   7   24.80    1.78 
   8  -3  -7   20.77    1.48 
   8   3  -7   23.15    1.66 
  -8   3   7   22.21    1.74 
   7   3  -7    0.50    0.50 
  -7  -3   7    0.71    0.59 
   7  -3  -7    0.89    0.52 
  -7   3   7    1.65    0.63 
  -6   3   7  508.78   13.96 
   6  -3  -7  517.36   12.66 
   6   3  -7  507.27   12.96 
  -6   3   7  524.62   13.16 
   5   3  -7    2.58    0.57 
  -5   3   7    2.54    0.59 
  -5   3   7    2.72    0.39 
  -5  -3   7    2.94    0.63 
   5  -3  -7    2.36    0.45 
   4   3  -7 1270.73   30.02 
  -4  -3   7 1290.27   32.36 
  -4   3   7 1282.72   31.79 
  -4   3   7 1254.99   32.31 
   4  -3  -7 1283.09   29.66 
   3  -3  -7    0.06    0.16 
   3   3  -7    0.49    0.27 
  -3   3   7    0.14    0.21 
  -3   3   7    0.13    0.22 
  -3  -3   7    0.54    0.30 
  -2  -3   7 1084.37   27.70 
   2   3  -7 1097.20   25.81 
  -2   3   7 1094.17   27.48 
   2  -3  -7 1128.33   25.60 
  -1   3   7    8.64    0.58 
   1   3  -7    8.79    0.65 
  -1  -3   7    7.80    0.52 
   0   3   7    9.35    0.60 
   0  -3   7    9.01    0.58 
   0   3  -7    7.97    0.58 
   0   3   7    8.42    0.38 
   1   3   7    1.39    0.24 
   1  -3   7    1.36    0.30 
  -1   3  -7    1.11    0.27 
  -1   3  -7    1.59    0.30 
   1   3   7    1.37    0.29 
   2  -3   7    4.06    0.48 
   2   3   7    4.23    0.45 
   2   3   7    3.04    0.39 
   3  -3   7   17.08    0.97 
   3   3   7   15.92    0.92 
   3   3   7   16.89    0.86 
   4   3   7  171.52    4.86 
   4  -3   7  175.78    4.88 
  -4   3  -7  171.78    4.77 
   4   3   7  175.81    4.89 
  -5   3  -7   26.71    1.19 
   5   3   7   26.99    1.44 
   5  -3   7   25.16    1.37 
   5   3   7   27.35    1.19 
  -6   3  -7  324.27    8.83 
   6  -3   7  328.98    8.70 
   6   3   7  325.33    8.63 
   6   3   7  322.84    8.76 
   7  -3   7    5.42    0.85 
  -7   3  -7    6.73    0.76 
   7   3   7    5.48    0.94 
   8  -3   7  156.41    5.02 
   8   3   7  144.28    5.02 
  -8   3  -7  148.61    4.81 
   9   3   7    5.22    1.07 
   9  -3   7    6.34    1.10 
  10  -3   7    7.59    1.28 
  10   3   7    6.50    1.22 
  11   3   7    3.50    1.07 
  11  -3   7    3.53    1.07 
  11   4  -7    8.19    1.40 
 -11  -4   7    8.76    1.49 
 -11   4   7    7.25    1.36 
 -10  -4   7    2.39    1.00 
  10   4  -7    3.60    1.03 
 -10   4   7    3.81    1.03 
  10  -4  -7    2.60    0.88 
   9  -4  -7    4.75    0.87 
   9   4  -7    4.24    0.92 
  -9  -4   7    3.83    1.02 
  -9   4   7    3.33    0.97 
   8  -4  -7   67.68    2.63 
  -8   4   7   61.27    2.95 
   8   4  -7   64.16    2.83 
  -8  -4   7   60.45    2.97 
  -7  -4   7    6.89    1.04 
  -7   4   7    6.18    0.98 
   7   4  -7    5.82    0.90 
   7  -4  -7    6.20    0.75 
   6  -4  -7   57.32    2.13 
  -6   4   7   59.83    2.14 
   6   4  -7   63.18    2.53 
  -6  -4   7   60.01    2.67 
  -6   4   7   60.96    2.62 
  -5   4   7    3.75    0.51 
   5   4  -7    2.92    0.63 
  -5   4   7    3.63    0.69 
   5   4  -7    3.06    0.29 
  -5  -4   7    2.48    0.60 
   5  -4  -7    3.64    0.48 
  -4   4   7   66.71    2.28 
   4   4  -7   68.39    2.44 
  -4   4   7   68.46    2.58 
   4  -4  -7   69.58    2.03 
  -4  -4   7   66.99    2.58 
  -3  -4   7    9.10    0.75 
   3   4  -7    8.71    0.76 
  -3   4   7   10.28    0.72 
   3  -4  -7   10.03    0.52 
   2   4  -7  421.74   10.46 
  -2   4   7  425.75   11.05 
   2  -4  -7  425.37   10.03 
  -2  -4   7  426.26   11.16 
  -1   4   7    6.77    0.56 
   1   4  -7    5.67    0.57 
   0   4   7  672.58   15.29 
   0   4  -7  654.34   15.62 
   0   4   7  637.75   16.64 
  -1   4  -7   37.64    1.40 
   1   4   7   40.49    1.26 
   1   4   7   38.42    1.48 
  -1   4  -7   37.19    1.37 
   2   4   7    0.30    0.27 
   2   4   7    0.27    0.27 
   2  -4   7    0.43    0.34 
   3   4   7  270.01    7.48 
   3   4   7  291.39    7.18 
   3  -4   7  280.02    7.23 
   4   4   7   48.79    1.81 
   4   4   7   48.87    1.96 
   4  -4   7   48.11    1.94 
   5   4   7   45.89    1.75 
  -5   4  -7   47.27    1.77 
   5  -4   7   45.55    1.95 
   5   4   7   47.66    2.00 
   6   4   7    5.56    0.87 
   6   4   7    5.60    0.61 
  -6   4  -7    5.66    0.70 
   6  -4   7    5.75    0.86 
  -7   4  -7    9.36    0.93 
   7   4   7   11.05    1.23 
   7  -4   7   10.09    1.10 
   8  -4   7   67.37    2.91 
   8   4   7   68.97    3.06 
   9   4   7   -0.25    0.63 
   9  -4   7    0.08    0.61 
  10  -4   7   51.58    2.81 
  10   4   7   54.74    2.98 
  11  -4   7    2.41    0.97 
  11   4   7    0.49    0.87 
  11   5  -7   20.35    2.00 
 -11  -5   7   22.41    2.02 
 -11   5   7   16.87    1.88 
  10   5  -7    1.30    0.76 
 -10  -5   7    0.68    0.78 
 -10   5   7    1.41    0.81 
   9  -5  -7   83.98    3.15 
   9   5  -7   74.79    3.40 
  -9   5   7   75.74    3.54 
  -9  -5   7   79.86    3.63 
   8   5  -7    1.17    0.71 
   8  -5  -7    1.04    0.63 
  -8  -5   7    1.47    0.76 
  -8   5   7    1.91    0.79 
   7  -5  -7   66.70    2.44 
  -7  -5   7   68.28    3.00 
  -7   5   7   62.30    2.89 
   7   5  -7   62.74    2.78 
  -6   5   7   34.16    1.56 
  -6  -5   7   35.05    1.96 
   6   5  -7   32.67    1.79 
   6  -5  -7   36.59    1.56 
  -6   5   7   37.45    1.96 
   5   5  -7   14.16    1.12 
  -5  -5   7   13.85    1.16 
  -5   5   7   14.75    1.21 
   5  -5  -7   14.98    0.90 
  -5   5   7   13.62    0.97 
   5   5  -7   15.55    0.74 
  -4  -5   7  176.88    5.49 
   4  -5  -7  188.84    4.66 
  -4   5   7  178.64    5.23 
   4   5  -7  183.69    5.22 
   3  -5  -7   86.60    2.26 
  -3   5   7   82.93    2.80 
   3   5  -7   85.96    2.84 
  -2   5   7   31.65    1.39 
   2   5  -7   32.66    1.44 
   1   5  -7  541.82   12.96 
  -1   5   7  520.37   13.72 
   0   5   7  131.87    3.23 
   0   5   7  130.51    3.89 
   0   5  -7  127.22    3.68 
   1   5   7 1358.27   34.03 
  -1   5  -7 1352.26   31.18 
   1   5   7 1386.57   31.55 
  -1   5  -7 1350.92   31.79 
  -2   5  -7    1.76    0.38 
   2   5   7    0.68    0.31 
   2   5   7    0.25    0.24 
  -2   5  -7    2.18    0.40 
   3  -5   7  500.08   12.27 
   3   5   7  498.59   12.18 
   3   5   7  495.47   12.92 
   4  -5   7   31.54    1.51 
   4   5   7   30.56    1.38 
   4   5   7   30.89    1.51 
   5   5   7   12.86    1.13 
  -5   5  -7   13.33    0.91 
   5   5   7   11.63    0.88 
   5  -5   7   13.37    1.09 
   6   5   7   87.54    2.85 
   6  -5   7   87.18    3.14 
   6   5   7   89.70    3.24 
  -6   5  -7   87.28    3.01 
   7   5   7    3.23    0.94 
   7  -5   7    3.91    0.84 
  -7   5  -7    3.37    0.70 
   8   5   7    8.10    1.20 
   8  -5   7    9.80    1.18 
   9   5   7    3.16    1.03 
   9  -5   7    2.29    0.86 
  10   5   7    1.97    0.94 
  10  -5   7    3.71    1.03 
  11  -5   7    3.12    1.07 
  11   5   7    5.15    1.21 
  11   6  -7    4.91    1.25 
 -11   6   7    6.60    1.37 
  10   6  -7    0.26    0.67 
 -10  -6   7    1.53    0.83 
 -10   6   7    0.44    0.67 
  -9  -6   7    5.33    1.19 
   9   6  -7    2.26    0.94 
  -9   6   7    2.94    1.02 
   8   6  -7    3.13    0.82 
  -8  -6   7    3.81    0.97 
  -8   6   7    2.31    0.80 
   8  -6  -7    3.19    0.70 
   7   6  -7   80.46    3.33 
   7  -6  -7   79.80    2.83 
  -7   6   7   82.98    3.51 
  -7  -6   7   84.04    3.53 
  -6  -6   7    7.67    1.02 
   6  -6  -7    6.54    0.70 
  -6   6   7    6.57    0.76 
   6   6  -7    6.43    0.94 
  -6   6   7    6.24    0.93 
   5  -6  -7   34.95    1.39 
  -5   6   7   33.41    1.65 
   5   6  -7   32.71    1.34 
  -5   6   7   33.89    1.82 
   5   6  -7   30.43    1.76 
   4  -6  -7    4.47    0.43 
   4   6  -7    3.93    0.71 
  -4   6   7    4.75    0.63 
   3  -6  -7  163.65    4.08 
   3   6  -7  161.86    4.78 
  -3   6   7  168.43    4.93 
  -2   6   7   47.09    1.89 
   2   6  -7   45.65    1.86 
  -2   6   7   44.81    1.24 
  -1   6   7  311.24    8.61 
   1   6  -7  318.43    8.16 
  -1   6   7  323.60    7.53 
   0   6   7    6.44    0.43 
   0   6  -7    6.89    0.66 
   0   6   7    7.14    0.66 
   1   6   7   49.63    1.99 
  -1   6  -7   52.19    1.89 
   1   6   7   54.99    1.67 
  -2   6  -7  105.74    3.21 
   2   6   7  104.85    3.09 
   2   6   7  113.26    3.45 
  -2   6  -7  107.82    3.15 
   3   6   7  871.77   20.72 
   3  -6   7  852.37   20.82 
   3   6   7  888.09   22.16 
   4  -6   7   25.05    1.38 
   4   6   7   25.86    1.38 
   4   6   7   26.82    1.32 
   5   6   7  592.12   14.61 
   5   6   7  527.97   14.01 
   5  -6   7  562.42   14.00 
  -6   6  -7    4.40    0.67 
   6   6   7    3.41    0.54 
   6  -6   7    5.14    0.81 
   6   6   7    3.39    0.75 
   7  -6   7  105.24    3.73 
   7   6   7  104.41    3.85 
  -7   6  -7  100.83    3.60 
   8   6   7    3.13    0.85 
   8  -6   7    4.43    0.91 
   9   6   7    5.39    1.19 
   9  -6   7    5.41    1.07 
  10  -6   7    0.78    0.75 
  10   6   7    0.17    0.79 
  11   6   7    1.62    1.01 
  11  -6   7    0.47    0.84 
  11   7  -7   35.26    2.61 
 -11   7   7   39.20    2.69 
 -10   7   7    1.74    0.78 
  10   7  -7    0.02    0.72 
   9   7  -7   86.09    3.75 
  -9   7   7   77.16    3.74 
   8   7  -7   17.54    1.53 
  -8   7   7   18.84    1.62 
   7   7  -7   22.51    1.74 
  -7   7   7   22.15    1.77 
  -6   7   7   36.55    1.81 
  -6   7   7   35.36    2.03 
   6  -7  -7   38.44    1.59 
   6   7  -7   37.22    2.01 
   5  -7  -7    0.06    0.38 
   5   7  -7   -0.43    0.44 
  -5   7   7   -0.09    0.44 
   5   7  -7   -0.08    0.32 
  -4   7   7   17.47    1.17 
   4  -7  -7   17.92    0.85 
   4   7  -7   14.81    1.18 
  -3   7   7   38.35    1.20 
   3   7  -7   40.72    1.86 
  -3   7   7   38.92    1.80 
  -3   7   7   37.29    1.17 
   2   7  -7   24.88    1.37 
  -2   7   7   24.47    1.37 
  -2   7   7   24.73    0.83 
  -1   7   7  965.72   21.98 
  -1   7   7  933.87   24.13 
   1   7  -7  940.57   22.60 
   0   7   7   25.43    1.35 
   0   7  -7   25.57    1.30 
   0   7   7   25.57    0.95 
   1   7   7 2065.62   51.10 
  -1   7  -7 2021.83   47.66 
   1   7   7 2065.06   47.36 
   2   7   7   20.87    1.07 
  -2   7  -7   21.82    1.16 
  -2   7  -7   20.43    1.15 
   2   7   7   19.64    1.20 
   3   7   7  990.79   23.79 
  -3   7  -7  996.27   23.37 
  -3   7  -7 1013.29   23.84 
   3   7   7 1011.26   25.48 
   4  -7   7    3.56    0.67 
   4   7   7    2.53    0.55 
   4   7   7    2.75    0.61 
   5  -7   7   46.36    2.10 
   5   7   7   47.60    2.17 
   5   7   7   49.86    2.01 
   6  -7   7   -0.19    0.49 
   6   7   7   -0.46    0.53 
   6   7   7   -0.40    0.35 
  -6   7  -7   -0.18    0.41 
   7   7   7   11.59    1.33 
   7  -7   7   12.59    1.24 
  -7   7  -7   10.89    1.10 
   8  -7   7    5.14    0.97 
   8   7   7    4.30    1.04 
   9   7   7    0.90    0.79 
   9  -7   7    1.11    0.75 
  10   7   7   12.51    1.67 
  10  -7   7   15.77    1.60 
 -10   8   7    3.92    1.07 
  10   8  -7    1.96    1.05 
   9   8  -7    3.88    1.08 
  -9   8   7    6.57    1.28 
   8   8  -7    0.93    0.69 
  -8   8   7    1.38    0.76 
   7   8  -7   35.87    2.20 
  -7   8   7   35.11    2.19 
  -6   8   7    0.16    0.62 
   6   8  -7    0.74    0.62 
  -6   8   7    1.06    0.61 
  -5   8   7    8.37    0.96 
   5   8  -7   10.37    1.17 
   5  -8  -7    8.55    0.75 
   5   8  -7    8.01    0.75 
  -4   8   7    7.53    0.59 
   4   8  -7    7.91    0.97 
  -4   8   7    7.24    0.58 
  -4   8   7    7.63    0.91 
  -3   8   7  131.05    4.23 
   3   8  -7  127.06    4.09 
  -3   8   7  120.75    3.24 
  -2   8   7   26.77    0.94 
   2   8  -7   26.47    1.48 
  -2   8   7   25.94    1.53 
  -1   8   7  171.94    5.34 
   1   8  -7  178.03    5.07 
  -1   8   7  178.30    4.38 
   0   8  -7   -0.45    0.41 
   0   8   7    0.09    0.41 
   0   8   7    0.69    0.30 
   1   8   7    6.56    0.75 
  -1   8  -7    4.78    0.67 
   1   8   7    6.84    0.58 
  -2   8  -7    3.69    0.65 
   2   8   7    2.75    0.63 
   2   8   7    3.17    0.53 
  -3   8  -7  216.41    5.85 
   3   8   7  214.44    6.23 
  -3   8  -7  210.31    5.71 
   3   8   7  207.25    5.77 
   4   8   7    0.05    0.44 
  -4   8  -7    1.12    0.49 
   4   8   7    0.13    0.43 
  -4   8  -7    1.27    0.49 
   5  -8   7  210.06    5.90 
   5   8   7  198.19    5.94 
   5   8   7  197.92    5.91 
   6  -8   7   12.18    1.20 
   6   8   7   13.52    1.33 
   6   8   7   14.50    1.10 
   7  -8   7   32.20    1.87 
   7   8   7   26.30    1.85 
  -7   8  -7   34.40    1.82 
   8   8   7    2.52    0.94 
   8  -8   7    3.40    0.92 
   9   8   7   -0.29    0.65 
   9  -8   7    0.44    0.68 
  10   8   7    0.14    0.85 
  10  -8   7    0.32    0.75 
  10   9  -7    0.15    0.80 
 -10   9   7    1.57    0.88 
   9   9  -7    0.34    0.73 
  -9   9   7    0.76    0.63 
   8   9  -7    0.79    0.78 
  -8   9   7    0.64    0.79 
  -7   9   7    0.50    0.59 
  -7   9   7    1.32    0.68 
   7   9  -7    1.32    0.72 
   6   9  -7    8.73    1.23 
  -6   9   7   10.05    1.18 
   5   9  -7   11.14    0.92 
   5   9  -7   12.12    1.27 
  -5   9   7   11.28    1.10 
  -4   9   7   28.48    1.86 
   4   9  -7   34.75    1.76 
   4   9  -7   39.23    2.09 
  -3   9   7   26.70    1.63 
   3   9  -7   25.28    1.55 
  -3   9   7   24.61    0.98 
  -2   9   7   40.10    1.36 
   2   9  -7   47.14    2.08 
  -2   9   7   39.21    2.02 
   1   9  -7    3.44    0.68 
  -1   9   7    2.62    0.63 
  -1   9   7    3.29    0.37 
   0   9  -7    2.69    0.58 
   0   9   7    2.60    0.40 
   0   9   7    2.66    0.64 
  -1   9  -7    0.16    0.40 
   1   9   7    0.18    0.39 
   1   9   7    0.08    0.31 
   2   9   7    6.12    0.83 
  -2   9  -7    7.21    0.80 
   2   9   7    6.63    0.69 
   3   9   7    5.99    0.80 
  -3   9  -7    5.37    0.73 
   3   9   7    5.62    0.72 
  -3   9  -7    5.52    0.74 
  -4   9  -7   28.61    1.59 
   4   9   7   28.05    1.64 
  -4   9  -7   25.58    1.50 
   4   9   7   32.66    1.72 
  -5   9  -7    6.06    0.82 
   5   9   7    5.50    0.79 
   5   9   7    5.36    0.87 
  -5   9  -7    6.33    0.82 
   6   9   7   15.02    1.47 
   6  -9   7   19.60    1.54 
   6   9   7   17.46    1.42 
  -7   9  -7    5.55    0.89 
   7   9   7    5.38    1.04 
   7  -9   7    5.18    0.92 
   8   9   7    1.25    0.91 
   8  -9   7    2.22    0.86 
   9   9   7    0.43    0.70 
   9  -9   7    0.89    0.66 
  10   9   7    0.20    0.83 
  10  -9   7    1.01    0.87 
  10  10  -7    0.45    0.90 
 -10  10   7    2.26    0.95 
  -9  10   7    0.19    0.72 
   9  10  -7    0.31    0.74 
   8  10  -7    2.97    1.03 
  -8  10   7    5.98    1.28 
  -7  10   7    3.22    0.90 
  -7  10   7    3.52    0.87 
   7  10  -7    2.93    0.95 
   6  10  -7    1.46    0.79 
  -6  10   7    0.82    0.66 
   5  10  -7    0.73    0.45 
  -5  10   7   -0.67    0.43 
   5  10  -7    0.24    0.54 
  -4  10   7    7.74    1.00 
   4  10  -7    9.70    0.92 
   4  10  -7   10.13    1.14 
   3  10  -7    5.08    0.86 
  -3  10   7    5.80    0.90 
   2  10  -7   59.31    2.51 
  -2  10   7   59.90    1.80 
  -2  10   7   55.26    2.57 
   1  10  -7    5.01    0.82 
  -1  10   7    5.63    0.50 
  -1  10   7    5.88    0.84 
   0  10   7   40.96    2.09 
   0  10  -7   43.84    1.96 
   0  10   7   44.70    1.61 
   1  10   7    6.41    0.89 
  -1  10  -7    6.09    0.82 
   1  10   7    8.49    0.72 
   2  10   7   10.92    0.93 
   2  10   7    8.73    1.03 
  -2  10  -7   15.23    1.16 
  -3  10  -7   52.44    2.22 
   3  10   7   61.50    2.28 
   3  10   7   50.59    2.38 
  -4  10  -7    3.68    0.71 
   4  10   7    2.09    0.68 
  -4  10  -7    4.21    0.74 
   4  10   7    3.39    0.75 
  -5  10  -7   53.56    2.25 
   5  10   7   49.07    2.32 
  -5  10  -7   55.20    2.33 
   5  10   7   55.65    2.48 
   6  10   7    0.11    0.64 
  -6  10  -7    0.91    0.64 
  -6  10  -7    1.09    0.65 
  -7  10  -7   12.47    1.28 
   7 -10   7   11.59    1.28 
   7  10   7   11.83    1.36 
   8 -10   7    3.93    0.98 
   8  10   7    3.87    1.07 
   9  10   7    0.31    0.88 
   9 -10   7    1.15    0.77 
  10  10   7    4.22    1.27 
  10 -10   7    7.09    1.28 
   9  11  -7   21.48    2.16 
  -9  11   7   20.66    2.14 
   8  11  -7    4.47    1.18 
  -8  11   7    6.59    1.29 
  -7  11   7   11.26    1.31 
  -7  11   7   11.07    1.52 
   7  11  -7   11.24    1.47 
  -6  11   7   30.24    1.98 
   6  11  -7   25.50    1.93 
   5  11  -7    1.12    0.54 
  -5  11   7    0.82    0.65 
   5  11  -7   -0.32    0.66 
  -4  11   7   35.48    2.10 
   4  11  -7   39.70    2.18 
   4  11  -7   39.02    1.97 
  -3  11   7    9.53    1.16 
   3  11  -7   10.10    1.15 
  -2  11   7   28.20    1.80 
   2  11  -7   31.19    1.79 
   1  11  -7  147.35    4.58 
  -1  11   7  141.83    4.93 
  -1  11   7  144.16    3.90 
   0  11   7    0.57    0.39 
   0  11   7   -0.02    0.46 
   0  11  -7    0.44    0.53 
   1  11   7  368.75   10.68 
   1  11   7  386.75    9.50 
  -2  11  -7    1.88    0.62 
   2  11   7    2.19    0.56 
   2  11   7    1.12    0.56 
   3  11   7  132.09    4.18 
   3  11   7  137.54    4.66 
  -3  11  -7  133.24    4.24 
   4  11   7    2.42    0.71 
   4  11   7    1.80    0.65 
  -4  11  -7    2.47    0.66 
  -5  11  -7   14.86    1.25 
   5  11   7   13.34    1.24 
  -5  11  -7   13.97    1.19 
   5  11   7   13.46    1.29 
  -6  11  -7    3.13    0.80 
   6  11   7    3.44    0.96 
  -6  11  -7    4.96    0.86 
   7  11   7    2.14    0.94 
  -7  11  -7    3.08    0.83 
  -7  11  -7    2.37    0.82 
   8  11   7   14.58    1.63 
   9 -11   7    1.94    0.84 
   9  11   7    0.85    0.96 
  -9  12   7    1.66    0.96 
   9  12  -7    0.95    1.04 
  -8  12   7    0.56    0.67 
   8  12  -7   -0.48    0.81 
   7  12  -7   19.16    1.86 
  -7  12   7   18.83    1.66 
  -6  12   7    0.05    0.61 
   6  12  -7    0.88    0.84 
   5  12  -7    2.90    1.02 
  -5  12   7    3.22    0.95 
   4  12  -7    2.68    0.67 
  -4  12   7    2.07    0.79 
   4  12  -7    2.31    0.82 
   3  12  -7   23.75    1.70 
   3  12  -7   20.87    1.52 
  -3  12   7   18.87    1.69 
  -2  12   7    7.30    1.10 
   2  12  -7    8.34    1.06 
   1  12  -7   39.16    1.98 
  -1  12   7   40.94    2.26 
   0  12   7    8.62    1.07 
   0  12  -7    7.79    0.94 
   0  12   7    9.42    0.80 
  -1  12  -7    1.91    0.64 
   1  12   7    1.94    0.54 
   1  12   7    1.99    0.69 
  -2  12  -7   19.20    1.37 
   2  12   7   21.26    1.28 
   2  12   7   19.97    1.52 
   3  12   7  122.47    4.48 
   3  12   7  126.22    4.07 
  -3  12  -7  125.10    4.12 
   4  12   7    0.68    0.63 
   4  12   7    0.20    0.55 
  -4  12  -7    0.01    0.53 
   5  12   7  111.26    4.16 
  -5  12  -7  106.57    3.82 
  -5  12  -7  109.74    3.76 
   5  12   7  107.97    4.03 
  -6  12  -7   12.32    1.24 
  -6  12  -7   12.12    1.19 
   6  12   7   11.41    1.35 
  -7  12  -7   29.96    1.96 
  -7  12  -7   26.61    1.81 
   7  12   7   29.36    2.15 
  -8  12  -7    8.40    1.14 
  -8  12  -7    8.15    1.17 
   8  12   7    7.12    1.36 
   9  12   7    0.29    0.91 
  -8  13   7   -0.18    0.72 
   8  13  -7   -0.01    0.86 
   7  13  -7    0.56    0.94 
  -7  13   7    1.51    0.86 
  -6  13   7    4.14    1.06 
   6  13  -7    4.58    1.14 
  -5  13   7    3.27    0.96 
   5  13  -7    2.74    0.96 
   4  13  -7   18.35    1.42 
   4  13  -7   17.76    1.53 
  -4  13   7   18.47    1.58 
   3  13  -7   -0.12    0.63 
   3  13  -7    0.31    0.52 
  -3  13   7   -0.20    0.58 
   2  13  -7    8.64    1.05 
   2  13  -7   10.11    1.18 
  -2  13   7    9.22    1.23 
  -1  13   7   37.90    2.30 
   1  13  -7   41.76    2.15 
   0  13  -7    1.85    0.72 
   0  13   7    3.91    0.94 
   1  13   7  137.81    4.98 
   1  13   7  139.84    4.15 
  -1  13  -7  130.85    4.39 
   2  13   7    7.88    0.93 
  -2  13  -7    6.05    0.96 
   2  13   7    5.71    1.00 
  -3  13  -7   59.84    2.57 
   3  13   7   55.36    2.81 
   3  13   7   57.87    2.49 
   4  13   7   33.85    2.09 
   4  13   7   34.53    1.98 
  -4  13  -7   30.54    1.84 
  -5  13  -7    5.96    0.96 
   5  13   7    4.55    0.98 
   5  13   7    5.66    1.04 
  -6  13  -7   15.98    1.38 
   6  13   7   19.68    1.63 
  -6  13  -7   18.73    1.51 
  -7  13  -7    4.88    0.94 
  -7  13  -7    5.88    1.03 
   7  13   7    6.26    1.22 
   8  13   7    1.09    0.89 
   8  14  -7    8.17    1.52 
  -8  14   7   10.01    1.66 
  -7  14   7    5.47    1.19 
   7  14  -7    6.93    1.46 
  -6  14   7   11.56    1.50 
   6  14  -7   13.35    1.62 
  -5  14   7   -0.79    0.67 
   5  14  -7    0.28    0.81 
   4  14  -7    1.57    0.77 
   4  14  -7    1.37    0.70 
  -4  14   7    1.15    0.80 
  -3  14   7    9.21    1.37 
   3  14  -7    9.55    1.26 
   3  14  -7    8.66    1.18 
   2  14  -7   26.87    1.78 
   2  14  -7   31.48    2.02 
  -2  14   7   33.46    2.22 
   1  14  -7   27.41    1.90 
   1  14  -7   25.26    1.70 
  -1  14   7   23.27    1.85 
   0  14   7   36.75    2.31 
   0  14  -7   35.52    1.98 
   1  14   7    0.72    0.64 
  -1  14  -7   -0.02    0.59 
  -2  14  -7    5.52    0.93 
   2  14   7    5.35    1.02 
   2  14   7    5.59    0.84 
   3  14   7   26.67    1.65 
   3  14   7   24.42    1.79 
  -3  14  -7   25.63    1.68 
  -4  14  -7    0.21    0.58 
   4  14   7    1.15    0.67 
   4  14   7    0.53    0.60 
  -5  14  -7    4.46    0.89 
   5  14   7    3.02    0.91 
   5  14   7    4.02    0.98 
   6  14   7    6.72    1.19 
  -6  14  -7    7.69    1.09 
   7  14   7    0.28    0.78 
  -7  14  -7   -0.42    0.62 
   8  14   7   23.56    2.15 
  -7  15   7   -1.23    0.62 
   7  15  -7    0.08    0.88 
   6  15  -7   59.63    3.26 
  -6  15   7   59.66    3.26 
  -5  15   7    2.96    1.01 
   5  15  -7    1.65    0.98 
  -4  15   7  159.21    5.99 
   4  15  -7  157.47    5.57 
   4  15  -7  171.15    5.71 
  -3  15   7    1.19    0.87 
   3  15  -7    2.29    0.79 
   3  15  -7    2.85    0.90 
   2  15  -7  100.78    3.89 
  -2  15   7  110.64    4.49 
   2  15  -7   99.29    4.11 
   1  15  -7    0.06    0.57 
   1  15  -7   -0.06    0.53 
  -1  15   7   -0.83    0.51 
   0  15  -7   12.27    1.38 
   0  15  -7   14.52    1.32 
   0  15   7   13.21    1.53 
   1  15   7    1.51    0.79 
  -1  15  -7    1.57    0.68 
   2  15   7    1.68    0.77 
  -2  15  -7    1.28    0.64 
   3  15   7    1.67    0.76 
  -3  15  -7    0.92    0.67 
  -4  15  -7   20.77    1.58 
   4  15   7   19.29    1.73 
   4  15   7   21.14    1.65 
   5  15   7    3.03    0.94 
  -5  15  -7    3.13    0.88 
   5  15   7    5.37    1.06 
   6  15   7   39.30    2.44 
  -6  15  -7   36.95    2.50 
  -7  15  -7    2.86    0.99 
   7  15   7    2.14    1.00 
  -7  16   7   -0.51    0.75 
   7  16  -7    0.57    0.82 
   6  16  -7   12.32    1.64 
  -6  16   7   12.74    1.69 
   5  16  -7    0.92    0.85 
  -5  16   7   -0.79    0.70 
   4  16  -7    2.97    0.91 
   4  16  -7    4.33    1.09 
  -4  16   7    3.76    1.12 
  -3  16   7   -0.43    0.67 
   3  16  -7   -0.02    0.54 
   3  16  -7   -0.27    0.59 
  -2  16   7   48.34    2.88 
   2  16  -7   51.29    2.77 
   2  16  -7   58.45    2.76 
   1  16  -7   -0.13    0.65 
   1  16  -7    1.22    0.72 
  -1  16   7   -0.28    0.65 
   0  16  -7   46.65    2.70 
   0  16  -7   41.77    2.30 
   0  16   7   42.56    2.69 
  -1  16  -7    0.88    0.70 
   1  16   7    0.66    0.72 
  -1  16  -7   -0.22    0.61 
   2  16   7    1.00    0.77 
  -2  16  -7    0.73    0.76 
  -2  16  -7    1.54    0.80 
  -3  16  -7    4.54    1.11 
  -3  16  -7    6.15    1.05 
   3  16   7    3.02    0.98 
  -4  16  -7    5.35    1.19 
  -4  16  -7    6.72    1.10 
   4  16   7    5.28    1.17 
  -5  16  -7    0.09    0.64 
   5  16   7    0.15    0.71 
   6  16   7    0.76    0.78 
  -6  16  -7   -0.16    0.75 
  -6  17   7    7.86    1.55 
   6  17  -7    9.04    1.54 
   5  17  -7    4.33    1.19 
  -5  17   7    3.39    1.10 
  -4  17   7   34.63    2.56 
   4  17  -7   33.66    2.29 
   4  17  -7   31.39    2.15 
   3  17  -7    1.28    0.84 
  -3  17   7    1.89    0.95 
   3  17  -7    1.43    0.83 
   2  17  -7    7.60    1.26 
   2  17  -7    8.79    1.27 
  -2  17   7    8.42    1.46 
  -1  17   7    2.60    0.96 
   1  17  -7    1.73    0.88 
   1  17  -7    3.00    0.93 
   0  17  -7    1.26    0.72 
   0  17   7    2.01    0.94 
   0  17  -7    1.70    0.82 
  -1  17  -7    1.80    0.79 
  -1  17  -7    1.76    0.78 
   1  17   7    1.86    0.90 
  -2  17  -7    5.89    1.02 
   2  17   7    5.59    1.19 
  -2  17  -7    4.59    1.09 
  -3  17  -7    1.17    0.77 
   3  17   7   -0.34    0.65 
  -4  17  -7    0.76    0.80 
   4  17   7    0.68    0.71 
  -5  17  -7    0.71    0.75 
  -6  17  -7   11.57    1.61 
   5  18  -7    3.64    1.13 
  -5  18   7    2.26    0.96 
  -4  18   7   -1.39    0.70 
   4  18  -7   -1.55    0.71 
   3  18  -7    0.80    0.73 
   3  18  -7    1.20    0.83 
  -3  18   7    1.44    0.97 
   2  18  -7    5.67    1.11 
  -2  18   7    4.00    1.25 
   2  18  -7    3.75    1.05 
   1  18  -7    0.44    0.71 
   1  18  -7    0.96    0.71 
  -1  18   7    0.74    0.87 
   0  18  -7    4.23    1.05 
   0  18  -7    3.45    0.93 
   0  18   7    2.91    1.07 
  -1  18  -7    2.99    0.96 
  -1  18  -7    2.96    0.91 
   1  18   7    1.84    0.96 
  -2  18  -7    1.08    0.84 
   2  18   7    1.30    0.85 
   3  18   7    7.36    1.39 
  -3  18  -7    8.12    1.46 
   4  18   7    8.98    1.46 
  -4  18  -7    8.09    1.48 
  -5  18  -7    2.52    1.04 
   3  19  -7    2.40    0.99 
  -3  19   7    0.61    0.87 
   3  19  -7    3.42    1.06 
   2  19  -7    4.55    1.17 
  -2  19   7    3.47    1.08 
   2  19  -7    3.51    1.08 
   1  19  -7    7.63    1.28 
   1  19  -7    5.66    1.27 
  -1  19   7    5.79    1.31 
   0  19  -7    4.49    1.24 
   0  19   7    6.10    1.38 
  -1  19  -7   11.96    1.64 
   1  19   7   10.63    1.67 
   2  19   7    4.08    1.21 
  -2  19  -7    1.70    1.02 
  -3  19  -7    3.33    1.10 
   3  19   7    6.06    1.38 
 -11   0   8    3.98    1.07 
  11   0  -8    3.27    0.97 
  10   0  -8    1.36    0.75 
 -10   0   8   -0.18    0.68 
  -9   0   8   63.75    3.15 
   9   0  -8   64.19    2.85 
  -8   0   8    0.79    0.64 
   8   0  -8    0.86    0.58 
  -7   0   8  439.57   12.43 
   7   0  -8  450.94   11.41 
  -6   0   8    5.90    0.83 
   6   0  -8    6.27    0.73 
  -5   0   8  874.23   21.69 
   5   0  -8  868.04   20.72 
  -4   0   8    1.09    0.22 
  -4   0   8    1.01    0.41 
   4   0  -8    0.58    0.29 
  -3   0   8  346.48    8.76 
   3   0  -8  347.95    8.35 
  -3   0   8  332.25    9.13 
   2   0  -8  295.07    7.09 
  -2   0   8  289.59    7.55 
  -2   0   8  291.26    7.75 
   1   0  -8   -1.10    0.21 
  -1   0   8   -0.88    0.21 
  -1   0   8   -0.87    0.23 
   0   0   8   15.67    0.64 
   0   0   8   16.23    0.81 
   0   0  -8   15.21    0.67 
   0   0  -8   15.26    0.69 
   1   0   8   94.39    2.83 
   1   0   8   94.39    2.62 
   2   0   8    2.38    0.36 
   2   0   8    2.34    0.37 
   3   0   8 1268.62   29.91 
   3   0   8 1272.84   31.88 
  -3   0  -8 1293.65   31.87 
  -4   0  -8   26.59    1.02 
   4   0   8   26.77    1.19 
   4   0   8   26.00    1.30 
  -5   0  -8 1205.85   29.72 
   5   0   8 1194.27   29.69 
   5   0   8 1153.84   28.11 
  -6   0  -8   10.79    0.79 
   6   0   8    9.49    0.99 
   6   0   8   11.81    0.84 
  -7   0  -8  219.68    6.34 
   7   0   8  220.53    6.49 
   8   0   8   45.17    2.36 
   9   0   8   13.36    1.47 
  10   0   8    3.67    1.04 
  11   0   8    0.13    0.85 
 -11  -1   8   32.84    2.39 
  11   1  -8   33.53    2.25 
  11  -1  -8   32.36    2.17 
 -11   1   8   35.72    2.44 
  10   1  -8   -0.47    0.57 
 -10  -1   8    0.04    0.63 
  10  -1  -8   -0.39    0.56 
 -10   1   8   -1.06    0.51 
  -9   1   8  134.08    5.05 
  -9  -1   8  127.52    5.00 
   9   1  -8  135.98    4.64 
   9  -1  -8  143.80    4.66 
  -8   1   8    2.04    0.80 
  -8  -1   8    2.99    0.84 
   8  -1  -8    1.45    0.62 
   8   1  -8    2.06    0.70 
  -7  -1   8  101.81    3.85 
   7   1  -8  106.47    3.48 
   7  -1  -8   86.37    3.26 
  -7   1   8  106.02    3.85 
  -6   1   8    0.24    0.48 
   6  -1  -8    0.02    0.38 
   6   1  -8   -0.11    0.42 
  -6  -1   8    1.67    0.56 
   5  -1  -8   12.92    0.94 
  -5   1   8   13.42    1.08 
  -5  -1   8   13.55    1.14 
  -5   1   8   15.19    0.72 
   5   1  -8   13.71    1.00 
   4  -1  -8   18.73    0.92 
  -4  -1   8   17.99    0.73 
  -4  -1   8   20.36    1.15 
  -4   1   8   17.69    1.10 
  -4   1   8   17.69    0.83 
   4   1  -8   18.93    1.00 
  -3  -1   8  155.94    4.67 
  -3  -1   8  161.85    4.31 
   3   1  -8  162.39    4.27 
   3  -1  -8  165.81    4.14 
  -3   1   8  163.65    4.37 
  -3   1   8  159.47    4.68 
  -2  -1   8    3.08    0.35 
   2  -1  -8    4.28    0.37 
  -2   1   8    3.26    0.36 
   2   1  -8    4.17    0.42 
  -2  -1   8    4.90    0.46 
  -2   1   8    3.15    0.42 
   1  -1  -8   -0.45    0.17 
  -1  -1   8   -0.67    0.18 
  -1   1   8   -0.41    0.18 
  -1  -1   8   -0.52    0.17 
   1   1  -8   -0.34    0.23 
   0   1  -8  229.96    5.70 
   0  -1   8  230.61    5.95 
   0   1  -8  232.57    5.59 
   0   1   8  227.70    5.59 
   0  -1   8  233.36    6.14 
   0   1   8  228.54    6.12 
   1   1   8  430.47   10.28 
   1  -1   8  430.97   11.09 
   1  -1   8  433.72   10.37 
   1   1   8  429.08   11.07 
   2  -1   8  182.94    4.82 
   2   1   8  180.91    4.76 
   2   1   8  185.12    5.08 
   2  -1   8  190.44    5.12 
   3  -1   8  237.68    6.44 
   3  -1   8  237.55    6.16 
  -3   1  -8  241.63    6.10 
   3   1   8  236.59    6.40 
   3   1   8  230.98    6.10 
   4   1   8   14.72    0.87 
  -4  -1  -8   15.00    0.74 
   4  -1   8   14.22    0.97 
   4  -1   8   14.68    0.87 
  -4   1  -8   13.55    0.69 
   4   1   8   14.43    0.99 
   5  -1   8    3.45    0.67 
  -5   1  -8    3.72    0.50 
  -5  -1  -8    2.91    0.51 
   5   1   8    4.35    0.70 
   5   1   8    3.10    0.50 
   5  -1   8    3.61    0.56 
   6   1   8   16.58    1.24 
   6  -1   8   14.49    1.14 
  -6   1  -8   17.15    0.99 
  -6  -1  -8   16.18    1.01 
   6   1   8   14.82    0.96 
   7   1   8  106.44    3.77 
  -7  -1  -8  101.49    3.48 
   7  -1   8  107.96    3.76 
  -7   1  -8  102.99    3.44 
   8   1   8   -0.41    0.61 
   8  -1   8    0.03    0.50 
   9  -1   8   65.85    3.08 
   9   1   8   63.87    3.07 
  10  -1   8   16.98    1.70 
  10   1   8   15.40    1.69 
  11  -1   8    5.65    1.31 
  11   1   8    7.22    1.37 
  11   2  -8    2.80    0.94 
 -11   2   8    4.04    1.05 
  11  -2  -8    2.44    0.89 
 -11  -2   8    2.02    0.94 
 -10   2   8    4.90    1.12 
  10   2  -8    4.46    1.06 
 -10  -2   8    4.84    1.16 
  10  -2  -8    4.75    0.98 
  -9   2   8   10.73    1.35 
   9   2  -8   10.43    1.23 
  -9  -2   8    8.82    1.30 
   9  -2  -8    8.29    1.10 
  -8  -2   8    1.20    0.70 
  -8   2   8    0.95    0.72 
   8   2  -8   -0.06    0.61 
   8  -2  -8   -0.67    0.50 
  -7   2   8  104.78    3.92 
  -7  -2   8  107.62    3.98 
   7  -2  -8  105.74    3.46 
   7   2  -8  104.15    3.60 
  -6   2   8    4.65    0.84 
  -6  -2   8    7.15    0.92 
   6   2  -8    4.45    0.72 
   6  -2  -8    5.17    0.69 
  -6   2   8    4.95    0.50 
  -5  -2   8  332.62    9.34 
   5  -2  -8  332.94    8.35 
   5   2  -8  334.36    8.58 
  -5   2   8  342.33    8.65 
  -5   2   8  326.09    9.30 
  -4  -2   8   29.21    1.46 
  -4   2   8   27.94    1.46 
   4   2  -8   32.66    1.42 
  -4   2   8   31.15    1.21 
   4  -2  -8   29.91    1.18 
  -3   2   8   26.94    1.08 
  -3  -2   8   25.24    1.25 
   3   2  -8   27.10    1.19 
  -3   2   8   28.36    1.27 
  -3  -2   8   26.35    0.99 
   3  -2  -8   27.37    0.98 
  -2   2   8  476.66   12.39 
   2   2  -8  469.21   11.54 
   2  -2  -8  493.38   11.24 
  -2  -2   8  482.68   12.40 
  -2   2   8  483.39   12.23 
  -2  -2   8  471.15   12.15 
   1  -2  -8    2.97    0.25 
  -1  -2   8    3.91    0.38 
  -1  -2   8    3.67    0.38 
   1   2  -8    3.29    0.41 
  -1   2   8    3.34    0.37 
   0  -2   8   22.17    1.03 
   0   2   8   28.79    0.86 
   0   2  -8   26.38    1.03 
   0   2   8   23.36    1.04 
   1  -2   8  103.45    2.91 
   1   2   8  103.41    2.73 
   1   2   8   99.44    3.02 
   1  -2   8  103.88    3.07 
   2  -2   8   11.41    0.75 
   2   2   8   12.15    0.72 
   2  -2   8   13.37    0.81 
   2   2   8   11.56    0.73 
  -3   2  -8  469.61   11.66 
   3   2   8  456.13   11.25 
   3   2   8  462.53   11.90 
   3  -2   8  465.38   11.97 
   3  -2   8  450.70   11.30 
   4  -2   8    1.00    0.43 
   4  -2   8    0.03    0.27 
   4   2   8   -0.65    0.36 
   4   2   8    0.40    0.30 
  -4   2  -8    0.03    0.23 
   5   2   8  464.76   11.60 
   5   2   8  460.73   11.88 
   5  -2   8  442.89   11.50 
  -5   2  -8  460.64   11.83 
   6  -2   8   18.58    1.31 
  -6   2  -8   18.53    1.09 
   6   2   8   17.15    1.32 
   6   2   8   17.71    1.06 
   7   2   8   70.96    2.89 
  -7   2  -8   71.07    2.58 
   7  -2   8   67.69    2.80 
  -7  -2  -8   68.51    2.62 
   8   2   8   33.12    2.12 
   8  -2   8   39.38    2.18 
   9  -2   8    0.26    0.71 
   9   2   8    1.46    0.73 
  10  -2   8   12.93    1.49 
  10   2   8   11.96    1.54 
  11   2   8    0.62    0.79 
  11  -2   8    0.38    0.86 
 -11   3   8    1.08    0.76 
 -11  -3   8    0.84    0.80 
  11   3  -8   -1.39    0.63 
  10  -3  -8   -0.38    0.62 
 -10  -3   8    1.27    0.84 
  10   3  -8    0.58    0.75 
 -10   3   8   -0.62    0.71 
   9   3  -8   -0.47    0.43 
  -9  -3   8   -0.73    0.49 
   9  -3  -8   -0.06    0.48 
  -9   3   8   -0.46    0.53 
   8  -3  -8    0.54    0.63 
  -8  -3   8    0.98    0.72 
  -8   3   8    1.24    0.78 
   8   3  -8    0.75    0.63 
   7   3  -8    0.40    0.49 
  -7  -3   8    0.58    0.55 
   7  -3  -8    0.49    0.45 
  -7   3   8    0.07    0.48 
   6  -3  -8   61.84    2.28 
  -6  -3   8   67.84    2.80 
  -6   3   8   62.13    2.18 
  -6   3   8   65.70    2.75 
   6   3  -8   64.88    2.55 
   5  -3  -8    4.66    0.53 
  -5   3   8    4.92    0.50 
   5   3  -8    5.26    0.69 
  -5  -3   8    4.79    0.77 
  -5   3   8    5.42    0.75 
  -4   3   8  268.62    7.25 
   4  -3  -8  275.30    6.73 
  -4   3   8  272.55    7.67 
   4   3  -8  280.71    7.16 
  -4  -3   8  263.29    7.65 
  -3   3   8   42.41    1.76 
  -3  -3   8   44.18    1.78 
   3  -3  -8   44.26    1.35 
   3   3  -8   42.82    1.67 
  -3   3   8   51.15    1.67 
   2   3  -8   93.67    2.80 
   2  -3  -8   95.75    2.30 
  -2  -3   8   91.64    2.89 
  -2   3   8   92.81    2.82 
  -2  -3   8   88.15    2.69 
  -1   3   8   30.80    1.21 
  -1  -3   8   28.30    1.15 
  -1  -3   8   29.38    1.15 
   1   3  -8   28.00    1.20 
   0   3   8   93.08    2.81 
   0   3   8   91.16    2.33 
   0   3  -8   91.84    2.68 
   0  -3   8   89.82    2.78 
   1   3   8    0.32    0.19 
  -1   3  -8    0.62    0.24 
   1  -3   8    0.21    0.20 
  -1   3  -8    0.47    0.22 
   1   3   8    1.61    0.31 
   2  -3   8  229.91    5.95 
   2   3   8  232.60    5.82 
   2   3   8  229.92    6.23 
   2  -3   8  225.55    6.28 
   3   3   8   48.11    1.79 
   3   3   8   50.62    1.82 
   3  -3   8   52.25    1.88 
   4   3   8   24.60    1.36 
   4   3   8   23.47    1.19 
  -4   3  -8   23.24    1.05 
   4  -3   8   26.70    1.38 
  -5   3  -8   24.97    1.15 
   5   3   8   26.24    1.21 
   5   3   8   25.22    1.41 
   5  -3   8   25.19    1.43 
   6   3   8    1.21    0.69 
  -6   3  -8    1.73    0.50 
   6   3   8    0.76    0.44 
   6  -3   8    1.48    0.59 
  -7   3  -8   20.69    1.25 
   7  -3   8   21.54    1.52 
   7   3   8   22.67    1.62 
   8   3   8    0.73    0.80 
   8  -3   8    1.36    0.70 
   9  -3   8    3.68    0.91 
   9   3   8    1.71    0.81 
  10  -3   8    0.50    0.78 
  10   3   8    0.66    0.84 
  11   3   8    2.36    0.96 
  11  -3   8    1.42    0.87 
 -11   4   8    0.64    0.74 
 -11  -4   8    1.08    0.79 
  11   4  -8   -0.40    0.70 
  10   4  -8    8.38    1.31 
 -10  -4   8    7.75    1.38 
 -10   4   8    8.48    1.39 
  -9  -4   8    6.97    1.19 
  -9   4   8    5.75    1.14 
   9  -4  -8    7.16    0.96 
   9   4  -8    5.98    1.08 
  -8  -4   8    0.72    0.76 
  -8   4   8    1.55    0.79 
   8   4  -8    0.73    0.63 
   8  -4  -8    0.28    0.58 
  -7   4   8   53.04    2.58 
   7  -4  -8   52.54    2.06 
   7   4  -8   47.30    2.28 
  -7  -4   8   53.58    2.58 
   6  -4  -8   -0.25    0.43 
  -6   4   8    0.68    0.56 
   6   4  -8    0.90    0.51 
  -6  -4   8    0.50    0.59 
  -6   4   8    0.75    0.43 
  -5  -4   8   88.25    3.27 
  -5   4   8   91.71    2.87 
   5  -4  -8   91.54    2.69 
  -5   4   8   86.59    3.26 
   5   4  -8   89.81    3.07 
  -4   4   8   34.75    1.69 
  -4  -4   8   32.82    1.68 
   4   4  -8   35.19    1.65 
   4  -4  -8   36.80    1.27 
  -4   4   8   36.86    1.51 
  -3  -4   8  148.99    4.53 
  -3   4   8  146.93    4.34 
   3   4  -8  153.18    4.31 
   3  -4  -8  151.18    3.73 
  -2  -4   8  882.77   22.55 
  -2   4   8  885.71   22.41 
   2   4  -8  895.81   21.11 
   1   4  -8   20.68    1.05 
   0   4  -8 1644.39   40.39 
   0   4   8 1785.40   43.26 
   0   4   8 1792.28   40.67 
   1   4   8    1.87    0.38 
  -1   4  -8    2.56    0.40 
  -1   4  -8    2.10    0.38 
   1   4   8    1.87    0.30 
   2   4   8  530.98   12.69 
   2  -4   8  528.97   12.89 
   2   4   8  530.68   13.66 
   3   4   8   38.12    1.55 
   3   4   8   37.91    1.56 
   3  -4   8   40.74    1.68 
   4  -4   8   85.03    2.87 
   4   4   8   85.01    2.81 
   4   4   8   90.70    2.91 
  -5   4  -8  100.94    3.11 
   5  -4   8  101.54    3.36 
   5   4   8  101.79    3.39 
   5   4   8   98.60    3.17 
   6  -4   8    9.75    1.03 
   6   4   8   10.05    1.10 
  -6   4  -8    9.55    0.84 
   6   4   8    8.96    0.80 
   7   4   8  146.19    4.78 
   7  -4   8  139.11    4.61 
  -7   4  -8  139.08    4.41 
   8  -4   8    8.06    1.12 
   8   4   8    9.94    1.29 
   9  -4   8   38.44    2.23 
   9   4   8   37.08    2.33 
  10  -4   8   16.11    1.64 
  10   4   8   16.00    1.72 
  11   4   8   -0.44    0.78 
  11  -4   8    0.38    0.85 
 -11  -5   8   14.85    1.78 
 -11   5   8   12.47    1.70 
  11   5  -8   11.46    1.67 
  10   5  -8    0.02    0.61 
 -10  -5   8   -0.43    0.77 
 -10   5   8    1.27    0.72 
  -9  -5   8   35.40    2.33 
  -9   5   8   36.20    2.36 
   9   5  -8   35.80    2.26 
  -8   5   8    0.23    0.56 
  -8  -5   8   -0.30    0.61 
   8  -5  -8    0.02    0.51 
   8   5  -8   -0.16    0.50 
  -7  -5   8   47.05    2.41 
  -7   5   8   42.61    2.33 
   7  -5  -8   44.69    1.92 
   7   5  -8   43.62    2.23 
  -6   5   8   15.62    1.32 
  -6   5   8   17.39    1.09 
   6  -5  -8   17.97    1.09 
  -6  -5   8   19.48    1.45 
   6   5  -8   16.45    1.32 
  -5   5   8    7.98    0.97 
  -5  -5   8    5.02    0.84 
   5   5  -8    4.39    0.77 
   5  -5  -8    5.18    0.56 
  -5   5   8    6.64    0.69 
   4  -5  -8  294.79    7.04 
  -4   5   8  284.54    7.84 
  -4  -5   8  286.38    8.16 
   4   5  -8  284.80    7.65 
   3   5  -8   44.06    1.85 
   3  -5  -8   46.74    1.31 
  -3   5   8   44.18    1.79 
  -3  -5   8   42.79    1.89 
   2   5  -8  232.99    6.12 
  -2   5   8  222.03    6.33 
   1   5  -8    0.82    0.36 
  -1   5   8    0.35    0.31 
   0   5   8  172.78    4.09 
   0   5   8  160.93    4.81 
   0   5  -8  167.86    4.60 
  -1   5  -8   80.44    2.49 
   1   5   8   76.98    2.20 
  -1   5  -8   79.69    2.44 
   1   5   8   73.45    2.58 
   2   5   8  116.22    3.22 
  -2   5  -8  111.21    3.33 
   2   5   8  116.68    3.54 
  -2   5  -8  113.82    3.28 
   3   5   8  258.45    6.70 
   3   5   8  264.91    7.12 
   3  -5   8  251.42    6.79 
   4   5   8  118.25    3.65 
   4  -5   8  121.31    3.70 
   4   5   8  114.32    3.63 
   5   5   8   19.04    1.14 
   5  -5   8   18.88    1.31 
   5   5   8   21.51    1.35 
  -5   5  -8   21.34    1.11 
   6   5   8    5.82    0.66 
  -6   5  -8    6.13    0.72 
   6   5   8    6.47    0.90 
   6  -5   8    6.39    0.86 
   7  -5   8    1.46    0.67 
  -7   5  -8    1.75    0.64 
   7   5   8    1.08    0.82 
   8   5   8    4.86    1.05 
   8  -5   8    6.36    1.04 
   9  -5   8   17.86    1.61 
   9   5   8   17.92    1.77 
  10  -5   8    8.73    1.34 
  10   5   8    8.58    1.44 
  11   5   8    8.68    1.49 
  11  -5   8    5.90    1.32 
 -11   6   8    2.20    0.97 
  11   6  -8   -0.83    0.77 
  10   6  -8   -0.17    0.60 
 -10  -6   8   -0.85    0.62 
 -10   6   8    0.06    0.64 
  -9  -6   8    8.99    1.46 
   9   6  -8    7.34    1.22 
  -9   6   8    9.26    1.43 
  -8  -6   8    0.33    0.64 
   8   6  -8   -0.07    0.52 
  -8   6   8    0.14    0.59 
  -7  -6   8   45.26    2.50 
   7  -6  -8   42.19    1.94 
  -7   6   8   43.13    2.45 
   7   6  -8   42.64    2.30 
   6  -6  -8    7.10    0.71 
  -6   6   8    9.04    1.09 
  -6  -6   8    7.24    1.01 
  -6   6   8    7.80    0.80 
   6   6  -8    5.09    0.88 
  -5   6   8   80.94    2.95 
  -5  -6   8   84.75    3.30 
   5  -6  -8   85.25    2.56 
  -5   6   8   86.41    3.31 
   5   6  -8   83.61    2.64 
   5   6  -8   83.07    3.12 
   4   6  -8    4.00    0.71 
  -4   6   8    3.89    0.59 
  -3   6   8   27.26    1.44 
   3  -6  -8   26.36    0.92 
   3   6  -8   31.22    1.55 
   2   6  -8    1.27    0.47 
  -2   6   8    1.30    0.42 
   1   6  -8    2.96    0.54 
  -1   6   8    3.09    0.55 
   0   6  -8   24.51    1.25 
   0   6   8   25.49    0.86 
   0   6   8   23.87    1.26 
  -1   6  -8    0.83    0.37 
   1   6   8    0.06    0.31 
   1   6   8    0.58    0.27 
  -2   6  -8   22.87    1.19 
  -2   6  -8   23.24    1.17 
   2   6   8   22.67    1.24 
   2   6   8   24.74    1.11 
   3   6   8   59.25    2.28 
   3   6   8   61.31    2.19 
   3  -6   8   61.11    2.30 
   4   6   8    1.11    0.50 
   4   6   8    1.30    0.44 
   4  -6   8    1.25    0.52 
   5  -6   8  140.07    4.35 
   5   6   8  138.14    4.33 
   5   6   8  136.40    4.25 
   6  -6   8   13.67    1.20 
  -6   6  -8   14.35    1.05 
   6   6   8   15.19    1.25 
   6   6   8   15.21    1.02 
   7   6   8   59.26    2.83 
   7  -6   8   66.10    2.79 
  -7   6  -8   65.50    2.59 
   8  -6   8   10.37    1.20 
   8   6   8    9.65    1.29 
   9   6   8    6.03    1.23 
   9  -6   8    4.55    1.04 
  10  -6   8    2.40    0.89 
  10   6   8    1.65    0.88 
  11  -6   8    0.48    0.86 
  11   6   8    0.51    0.85 
 -11   7   8    3.67    1.07 
  10   7  -8   -0.69    0.67 
 -10   7   8    0.56    0.70 
   9   7  -8    3.10    0.98 
  -9   7   8    4.39    1.16 
   8   7  -8    0.60    0.65 
  -8   7   8    1.26    0.68 
   7   7  -8    1.50    0.74 
  -7   7   8    1.85    0.85 
  -6   7   8   25.75    1.49 
  -6   7   8   24.67    1.68 
   6   7  -8   25.83    1.66 
   6  -7  -8   26.56    1.28 
   5   7  -8   30.98    1.78 
   5   7  -8   29.79    1.37 
  -5   7   8   31.92    1.66 
   5  -7  -8   30.13    1.27 
   4  -7  -8   95.68    2.64 
  -4   7   8  103.89    3.42 
   4   7  -8   90.18    3.33 
  -3   7   8    5.13    0.41 
   3   7  -8    4.72    0.82 
  -3   7   8    6.14    0.77 
   2   7  -8   81.13    2.85 
  -2   7   8   83.02    2.95 
  -1   7   8    8.24    0.85 
   1   7  -8    7.50    0.81 
  -1   7   8    9.52    0.46 
   0   7   8   12.52    1.01 
   0   7  -8   13.15    0.97 
   0   7   8   13.61    0.65 
   1   7   8   54.27    2.20 
   1   7   8   52.60    1.75 
  -1   7  -8   54.63    2.06 
   2   7   8   55.49    1.93 
  -2   7  -8   55.67    2.09 
   2   7   8   56.60    2.23 
  -2   7  -8   55.19    2.05 
  -3   7  -8   15.47    1.07 
  -3   7  -8   16.07    1.11 
   3   7   8    9.54    0.88 
   3   7   8    9.29    0.90 
   4   7   8   11.90    1.02 
   4  -7   8   10.59    1.01 
   4   7   8   12.53    0.97 
   5  -7   8   24.39    1.49 
   5   7   8   22.34    1.33 
   5   7   8   23.33    1.50 
   6  -7   8    0.64    0.56 
   6   7   8    0.41    0.45 
  -6   7  -8    0.73    0.50 
   6   7   8    1.09    0.59 
   7  -7   8   10.58    1.18 
  -7   7  -8    8.87    1.00 
   7   7   8    7.11    1.10 
   8  -7   8    0.33    0.59 
   8   7   8    0.78    0.68 
   9  -7   8    3.70    0.99 
   9   7   8    4.17    1.06 
  10  -7   8    3.31    1.03 
  10   7   8    3.39    1.09 
 -10   8   8    9.55    1.56 
  10   8  -8    7.43    1.47 
   9   8  -8    0.37    0.73 
  -9   8   8    0.46    0.76 
  -8   8   8    0.82    0.74 
   8   8  -8    0.21    0.63 
   7   8  -8    0.75    0.68 
  -7   8   8    0.80    0.73 
   6   8  -8    0.24    0.66 
  -6   8   8    0.21    0.59 
  -6   8   8    1.44    0.58 
   5   8  -8    2.08    0.53 
  -5   8   8    3.16    0.70 
   5   8  -8    2.57    0.77 
  -4   8   8   99.61    3.60 
   4   8  -8  106.98    3.68 
  -4   8   8  100.48    2.76 
  -4   8   8  104.74    2.72 
  -3   8   8   47.58    2.20 
   3   8  -8   51.81    2.28 
  -3   8   8   52.96    1.49 
  -2   8   8  971.58   24.69 
  -2   8   8  949.79   22.30 
  -1   8   8    9.10    0.90 
   1   8  -8    8.81    0.89 
  -1   8   8   10.12    0.54 
   0   8  -8 1255.02   29.81 
   0   8   8 1276.48   29.19 
   0   8   8 1243.38   31.89 
  -1   8  -8    4.12    0.65 
   1   8   8    4.34    0.48 
   1   8   8    4.62    0.70 
   2   8   8  558.23   14.61 
  -2   8  -8  545.61   13.59 
   2   8   8  550.42   13.37 
  -3   8  -8    8.20    0.81 
   3   8   8    8.31    0.86 
  -3   8  -8    7.36    0.78 
   3   8   8    8.39    0.80 
  -4   8  -8   51.50    2.19 
   4   8   8   58.23    2.30 
  -4   8  -8   51.71    2.14 
   4   8   8   60.12    2.35 
   5   8   8    6.74    0.91 
   5   8   8    6.05    0.81 
   5  -8   8    8.56    0.99 
   6  -8   8    9.55    1.07 
   6   8   8    5.85    1.02 
   6   8   8    7.33    0.90 
  -7   8  -8   14.90    1.21 
   7  -8   8   15.81    1.37 
   7   8   8   17.05    1.55 
   8   8   8   20.45    1.80 
   8  -8   8   18.00    1.56 
   9  -8   8   10.98    1.36 
   9   8   8    9.78    1.42 
  10  -8   8   21.35    1.84 
  10   8   8   23.35    2.18 
  10   9  -8    0.13    0.78 
 -10   9   8    0.79    0.93 
   9   9  -8    1.00    0.76 
  -9   9   8    1.46    0.78 
   8   9  -8    0.02    0.67 
  -8   9   8   -0.18    0.75 
  -7   9   8    0.52    0.56 
  -7   9   8   -0.35    0.52 
   7   9  -8    0.72    0.62 
  -6   9   8  100.73    3.79 
   6   9  -8  101.98    3.93 
  -5   9   8   17.80    1.34 
   5   9  -8   16.96    1.14 
   5   9  -8   15.61    1.38 
   4   9  -8  564.72   14.46 
   3   9  -8   -0.15    0.42 
  -3   9   8   -0.11    0.42 
  -2   9   8  408.51   11.37 
  -2   9   8  408.10    9.76 
   2   9  -8  420.32   10.72 
  -1   9   8    6.97    0.51 
  -1   9   8    7.10    0.88 
   1   9  -8    6.39    0.83 
   0   9   8    2.12    0.36 
   0   9   8    4.00    0.72 
   0   9  -8    2.32    0.60 
   1   9   8   10.57    0.98 
  -1   9  -8   13.88    1.08 
   1   9   8   12.31    0.81 
   2   9   8  244.22    6.30 
   2   9   8  235.53    7.03 
  -2   9  -8  233.78    6.50 
  -3   9  -8   18.69    1.21 
   3   9   8   17.47    1.24 
  -3   9  -8   19.62    1.25 
   3   9   8   17.29    1.14 
  -4   9  -8  123.61    3.89 
   4   9   8  118.91    3.90 
  -4   9  -8  117.21    3.76 
   4   9   8  121.22    4.10 
  -5   9  -8  121.60    3.95 
  -5   9  -8  119.09    3.84 
   5   9   8  114.97    3.99 
   5   9   8  122.72    4.08 
   6   9   8    0.32    0.54 
   6  -9   8    0.01    0.61 
   6   9   8   -0.07    0.62 
   7   9   8   13.88    1.43 
   7  -9   8   11.17    1.23 
   8   9   8    3.71    1.07 
   8  -9   8    3.63    0.95 
   9   9   8    0.41    0.71 
   9  -9   8    1.35    0.75 
  10  -9   8    0.99    0.93 
  10   9   8    0.57    0.89 
 -10  10   8    4.26    1.22 
  10  10  -8    4.70    1.25 
  -9  10   8    0.87    0.72 
   9  10  -8    0.14    0.75 
   8  10  -8    1.42    0.87 
  -8  10   8    2.33    1.03 
  -7  10   8    1.98    0.81 
   7  10  -8    0.56    0.63 
  -7  10   8    0.48    0.63 
  -6  10   8    8.47    1.10 
   6  10  -8    7.02    1.18 
   5  10  -8    5.37    0.77 
   5  10  -8    6.97    1.11 
  -5  10   8    4.59    0.86 
   4  10  -8   19.60    1.29 
  -4  10   8   17.70    1.40 
   4  10  -8   16.24    1.45 
   3  10  -8    0.26    0.51 
  -3  10   8    0.11    0.44 
   2  10  -8  520.15   13.25 
  -1  10   8    0.34    0.31 
  -1  10   8    0.22    0.45 
   1  10  -8    0.71    0.58 
   0  10   8  774.06   17.98 
   0  10  -8  747.48   18.59 
   1  10   8   48.20    2.27 
   1  10   8   48.37    1.79 
  -1  10  -8   47.68    2.09 
   2  10   8  261.09    6.73 
   2  10   8  252.50    7.51 
  -2  10  -8  246.23    6.94 
   3  10   8   81.89    3.26 
  -3  10  -8   88.90    3.10 
   3  10   8   90.62    3.05 
  -4  10  -8    5.04    0.80 
   4  10   8    4.31    0.78 
  -4  10  -8    5.69    0.81 
   4  10   8    3.18    0.72 
   5  10   8   27.41    1.72 
  -5  10  -8   27.49    1.65 
   5  10   8   27.60    1.68 
  -5  10  -8   28.73    1.62 
  -6  10  -8    1.34    0.67 
   6  10   8    0.87    0.70 
  -6  10  -8    1.71    0.67 
   7 -10   8    6.48    1.08 
   7  10   8    8.65    1.24 
   8 -10   8   10.47    1.31 
   8  10   8    8.21    1.38 
   9  10   8   11.06    1.60 
   9 -10   8   12.55    1.47 
  10 -10   8   19.49    1.87 
  10  10   8   13.30    1.82 
   9  11  -8    8.53    1.59 
  -9  11   8   11.59    1.69 
  -8  11   8    3.29    1.07 
   8  11  -8    3.72    1.19 
  -7  11   8   14.33    1.46 
   7  11  -8   14.39    1.68 
  -7  11   8   16.48    1.78 
  -6  11   8    8.12    1.14 
   6  11  -8    9.95    1.34 
   5  11  -8    1.44    0.79 
  -5  11   8    1.11    0.67 
   4  11  -8   67.95    2.99 
   4  11  -8   71.13    2.83 
  -4  11   8   71.67    3.12 
  -3  11   8    3.14    0.84 
   3  11  -8    4.03    0.85 
   2  11  -8   54.99    2.46 
  -2  11   8   52.84    2.57 
   1  11  -8    3.48    0.79 
  -1  11   8    3.52    0.84 
   0  11   8   16.42    1.38 
   0  11  -8   14.31    1.22 
   0  11   8   14.08    0.91 
  -1  11  -8   27.88    1.63 
   1  11   8   28.06    1.38 
   1  11   8   26.72    1.72 
   2  11   8  130.89    3.98 
   2  11   8  132.24    4.62 
  -2  11  -8  134.62    4.26 
  -3  11  -8    0.36    0.49 
   3  11   8    0.32    0.48 
   3  11   8    0.39    0.49 
   4  11   8   28.25    1.66 
  -4  11  -8   27.75    1.62 
   4  11   8   23.91    1.64 
   5  11   8   50.52    2.49 
   5  11   8   57.30    2.57 
  -5  11  -8   57.60    2.42 
  -5  11  -8   56.37    2.46 
   6  11   8    0.01    0.67 
  -6  11  -8    1.56    0.65 
  -6  11  -8    1.41    0.64 
   7  11   8   23.27    1.92 
  -7  11  -8   28.15    1.75 
  -7  11  -8   29.57    1.87 
   8  11   8    1.55    0.86 
   9 -11   8    7.43    1.27 
   9  11   8    4.73    1.28 
  -9  12   8    4.88    1.24 
   9  12  -8    2.69    1.08 
   8  12  -8    0.75    0.83 
  -8  12   8    0.38    0.72 
   7  12  -8   34.83    2.48 
  -7  12   8   36.45    2.28 
  -6  12   8    3.44    0.92 
   6  12  -8    2.17    0.90 
  -5  12   8   68.72    3.23 
   5  12  -8   71.59    3.30 
   4  12  -8   -0.53    0.55 
  -4  12   8    0.29    0.59 
   4  12  -8   -0.12    0.39 
   3  12  -8   30.13    1.93 
  -3  12   8   28.25    1.98 
  -2  12   8   21.08    1.63 
   2  12  -8   20.71    1.54 
   1  12  -8    2.17    0.68 
  -1  12   8    1.40    0.69 
   0  12  -8    1.72    0.64 
   0  12   8    1.42    0.61 
   1  12   8   31.81    1.50 
   1  12   8   30.96    1.95 
  -1  12  -8   34.26    1.82 
   2  12   8    2.32    0.62 
   2  12   8    3.33    0.83 
  -2  12  -8    1.56    0.67 
  -3  12  -8  110.98    3.75 
   3  12   8  107.76    4.07 
   3  12   8   97.65    3.54 
   4  12   8    7.49    1.01 
  -4  12  -8    7.20    0.98 
   4  12   8    7.73    1.08 
  -5  12  -8  134.63    4.45 
   5  12   8  141.17    4.92 
  -5  12  -8  141.05    4.60 
   5  12   8  134.82    4.68 
  -6  12  -8    1.91    0.73 
   6  12   8    2.75    0.87 
  -6  12  -8    2.89    0.78 
   7  12   8   31.25    2.17 
  -7  12  -8   29.79    1.85 
  -7  12  -8   30.36    1.95 
  -8  12  -8    2.49    0.87 
   8  12   8    1.41    0.78 
  -8  12  -8    1.70    0.72 
   9  12   8    4.09    1.21 
  -8  13   8    1.75    0.81 
   8  13  -8    2.35    1.10 
  -7  13   8   19.47    1.77 
   7  13  -8   21.07    2.02 
  -6  13   8    0.43    0.70 
   6  13  -8    1.18    0.82 
   5  13  -8    1.42    0.89 
  -5  13   8    1.68    0.83 
   4  13  -8    5.89    0.93 
   4  13  -8    6.50    1.11 
  -4  13   8    7.23    1.17 
   3  13  -8   12.43    1.39 
   3  13  -8   13.84    1.29 
  -3  13   8   16.76    1.59 
  -2  13   8    6.75    1.08 
   2  13  -8    6.01    1.05 
   1  13  -8    0.29    0.61 
  -1  13   8    0.90    0.69 
   0  13   8    9.95    1.25 
   0  13  -8    8.83    1.09 
   1  13   8   33.38    2.13 
  -1  13  -8   37.05    1.97 
   2  13   8    0.10    0.62 
   2  13   8    0.40    0.56 
  -2  13  -8    0.43    0.64 
  -3  13  -8   45.61    2.25 
   3  13   8   47.72    2.20 
   3  13   8   42.09    2.43 
   4  13   8    8.93    1.19 
  -4  13  -8    7.33    1.06 
   4  13   8    9.65    1.11 
   5  13   8    2.33    0.82 
  -5  13  -8    2.57    0.78 
   5  13   8    1.74    0.73 
   6  13   8    4.45    1.01 
  -6  13  -8    4.00    0.91 
  -6  13  -8    3.82    0.92 
   7  13   8    6.13    1.24 
  -7  13  -8    4.49    0.93 
  -7  13  -8    5.66    1.07 
   8  13   8    0.10    0.84 
  -8  14   8    1.17    0.75 
   8  14  -8    0.38    0.93 
   7  14  -8   21.10    2.12 
  -7  14   8   25.77    2.08 
   6  14  -8    1.86    0.95 
  -6  14   8    2.55    0.98 
  -5  14   8   32.26    2.28 
   5  14  -8   33.30    2.27 
   4  14  -8    1.65    0.84 
   4  14  -8    0.76    0.65 
  -4  14   8    0.72    0.76 
  -3  14   8   15.03    1.62 
   3  14  -8   14.07    1.41 
   3  14  -8   15.44    1.52 
   2  14  -8    9.14    1.20 
  -2  14   8    8.23    1.31 
   2  14  -8    8.35    1.15 
   1  14  -8    3.11    0.88 
  -1  14   8    1.77    0.84 
   0  14   8   32.93    2.24 
   0  14  -8   38.43    2.07 
  -1  14  -8    4.29    0.86 
   1  14   8    2.64    0.85 
  -2  14  -8   37.02    2.01 
   2  14   8   36.08    2.25 
   3  14   8    6.49    1.13 
   3  14   8    6.51    0.93 
  -3  14  -8    4.06    0.91 
   4  14   8    4.74    0.92 
   4  14   8    3.62    0.91 
  -4  14  -8    5.06    0.95 
   5  14   8   38.63    2.24 
   5  14   8   42.90    2.45 
  -5  14  -8   38.96    2.15 
   6  14   8    0.65    0.70 
  -6  14  -8   -0.01    0.63 
   7  14   8   18.37    1.84 
  -8  14  -8   -0.27    0.72 
   8  14   8    2.07    1.01 
  -7  15   8    0.20    0.69 
   7  15  -8   -1.09    0.73 
  -6  15   8    1.19    0.94 
   6  15  -8    1.46    1.03 
   5  15  -8    3.45    1.10 
  -5  15   8    3.78    1.11 
  -4  15   8   13.43    1.66 
   4  15  -8   13.16    1.50 
   4  15  -8   10.70    1.30 
   3  15  -8   11.22    1.27 
   3  15  -8    8.52    1.23 
  -3  15   8    8.78    1.37 
   2  15  -8    4.98    1.03 
   2  15  -8    6.70    1.06 
  -2  15   8    4.69    1.14 
  -1  15   8    3.74    1.03 
   1  15  -8    3.73    0.86 
   1  15  -8    4.47    0.96 
   0  15  -8    0.14    0.58 
   0  15   8   -0.43    0.52 
  -1  15  -8    2.68    0.80 
   1  15   8    2.32    0.82 
   2  15   8    1.97    0.85 
  -2  15  -8    2.12    0.75 
  -3  15  -8    7.25    1.08 
   3  15   8    7.04    1.22 
  -4  15  -8    4.20    0.97 
   4  15   8    3.19    0.99 
   5  15   8    5.85    1.13 
  -5  15  -8    5.82    1.05 
   5  15   8    6.84    1.12 
   6  15   8    2.63    0.95 
   7  15   8    0.86    0.87 
  -7  15  -8    0.76    0.79 
   6  16  -8    3.20    1.15 
  -6  16   8    2.82    1.10 
  -5  16   8    8.34    1.50 
   5  16  -8    7.48    1.37 
  -4  16   8   -1.35    0.58 
   4  16  -8    0.08    0.62 
   4  16  -8   -0.36    0.63 
   3  16  -8    4.30    1.06 
   3  16  -8    7.14    1.17 
  -3  16   8    6.12    1.27 
  -2  16   8    1.13    0.82 
   2  16  -8    1.19    0.77 
   2  16  -8    1.56    0.81 
  -1  16   8    7.34    1.31 
   1  16  -8    7.54    1.21 
   1  16  -8    7.43    1.16 
   0  16  -8    2.43    0.87 
   0  16  -8   -0.16    0.69 
   0  16   8    0.68    0.85 
   1  16   8   14.51    1.64 
  -1  16  -8   13.77    1.54 
  -1  16  -8   14.11    1.41 
  -2  16  -8    0.41    0.67 
   2  16   8   -0.34    0.70 
   3  16   8   21.43    1.87 
  -3  16  -8   19.93    1.61 
   4  16   8    1.99    0.93 
  -4  16  -8    4.14    0.98 
  -5  16  -8    6.97    1.28 
   5  16   8    6.76    1.25 
  -6  16  -8    0.37    0.76 
  -6  17   8   -0.19    0.82 
   6  17  -8   -0.26    0.80 
   5  17  -8    0.89    0.90 
  -5  17   8    1.91    1.00 
   4  17  -8    0.47    0.83 
   4  17  -8    1.23    0.74 
  -4  17   8   -0.17    0.84 
   3  17  -8   -1.23    0.56 
   3  17  -8   -0.37    0.69 
  -3  17   8    0.08    0.72 
   2  17  -8    1.93    0.85 
   2  17  -8    1.05    0.81 
  -2  17   8    0.79    0.88 
  -1  17   8    1.87    0.94 
   1  17  -8    2.42    0.92 
   1  17  -8    2.82    0.91 
   0  17  -8    4.68    1.04 
   0  17   8    5.51    1.23 
   0  17  -8    6.64    1.12 
  -1  17  -8    9.45    1.22 
  -1  17  -8    5.95    1.16 
   1  17   8    6.05    1.26 
  -2  17  -8    4.44    0.98 
  -2  17  -8    2.72    0.90 
   2  17   8    4.50    1.14 
  -3  17  -8    5.89    1.16 
  -3  17  -8    7.19    1.11 
   3  17   8    6.89    1.30 
  -4  17  -8    0.73    0.70 
   4  17   8   -0.32    0.64 
  -5  17  -8    0.80    0.83 
  -5  18   8   31.65    2.51 
  -4  18   8    0.13    0.80 
   4  18  -8    0.04    0.84 
  -3  18   8    7.95    1.49 
   3  18  -8    8.34    1.30 
   3  18  -8    8.67    1.35 
   2  18  -8    0.39    0.75 
  -2  18   8   -0.52    0.81 
   2  18  -8    0.93    0.72 
   1  18  -8    0.28    0.68 
  -1  18   8   -0.55    0.68 
   1  18  -8    0.87    0.68 
   0  18  -8   -0.12    0.68 
   0  18   8    0.82    0.77 
   0  18  -8    0.95    0.75 
  -1  18  -8    7.48    1.19 
  -1  18  -8    4.89    1.14 
   1  18   8    6.66    1.35 
  -2  18  -8    3.55    1.03 
   2  18   8    5.11    1.23 
  -3  18  -8   32.29    2.50 
   3  18   8   30.90    2.41 
  -4  18  -8    3.22    1.11 
   4  18   8    2.14    0.95 
   3  19  -8    7.66    1.35 
  -3  19   8    6.92    1.39 
   3  19  -8    7.72    1.38 
  -2  19   8    0.67    0.76 
   2  19  -8   -1.09    0.76 
   2  19  -8   -0.18    0.74 
   1  19  -8   -0.09    0.66 
  -1  19   8    1.93    1.01 
   1  19  -8    0.44    0.83 
   0  19  -8    2.20    1.02 
   0  19   8    2.06    1.02 
   0  19  -8    3.51    1.03 
   1  19   8    8.40    1.59 
  -1  19  -8    7.30    1.44 
  -2  19  -8    0.64    0.81 
   2  19   8    1.13    0.95 
  -3  19  -8    6.80    1.39 
   3  19   8   11.34    1.72 
  11   0  -9   -0.48    0.67 
 -11   0   9    2.56    0.97 
 -10   0   9   -1.31    0.56 
  10   0  -9   -0.47    0.58 
  -9   0   9    0.63    0.65 
   9   0  -9    0.81    0.67 
   8   0  -9   -0.44    0.45 
  -8   0   9    0.23    0.60 
  -7   0   9    1.99    0.75 
   7   0  -9    0.89    0.60 
   6   0  -9   -0.20    0.39 
  -6   0   9    0.38    0.42 
   5   0  -9    0.26    0.48 
   4   0  -9   -0.32    0.23 
  -4   0   9   -0.05    0.26 
  -4   0   9   -0.03    0.18 
  -3   0   9    1.15    0.37 
   3   0  -9    0.01    0.25 
  -3   0   9   -0.06    0.23 
   2   0  -9    0.24    0.21 
  -2   0   9    0.07    0.19 
  -2   0   9   -0.13    0.16 
   1   0  -9    0.53    0.22 
  -1   0   9    0.04    0.15 
  -1   0   9   -0.19    0.15 
   0   0  -9    0.24    0.16 
   0   0  -9    0.15    0.15 
   0   0   9    0.04    0.19 
   0   0   9    0.11    0.12 
   1   0   9    0.35    0.23 
   1   0   9   -0.02    0.21 
   1   0   9    0.21    0.08 
   2   0   9    0.31    0.22 
   2   0   9   -0.17    0.22 
   3   0   9   -0.20    0.24 
   3   0   9    0.29    0.32 
   4   0   9    0.39    0.34 
   4   0   9   -0.24    0.26 
  -4   0  -9    0.11    0.19 
  -5   0  -9    0.19    0.30 
   5   0   9    0.06    0.44 
   5   0   9    0.31    0.37 
   6   0   9    0.59    0.48 
   6   0   9    0.42    0.38 
  -6   0  -9    0.13    0.33 
  -7   0  -9   -0.12    0.40 
   7   0   9    1.46    0.65 
   8   0   9    0.31    0.66 
   9   0   9    0.29    0.68 
  10   0   9   -0.19    0.61 
  11   0   9    2.19    1.01 
  11   1  -9    1.19    0.81 
 -11   1   9    1.61    0.88 
  11  -1  -9   -0.19    0.62 
 -11  -1   9    1.50    0.92 
 -10  -1   9    2.57    0.91 
  10   1  -9    2.61    0.87 
 -10   1   9    0.84    0.84 
  10  -1  -9    2.93    0.83 
  -9  -1   9    5.68    1.16 
   9  -1  -9    4.91    0.98 
   9   1  -9    6.60    1.07 
  -9   1   9    8.14    1.20 
  -8   1   9   19.02    1.61 
   8   1  -9   18.80    1.42 
  -8  -1   9   18.60    1.58 
   8  -1  -9   19.82    1.37 
   7  -1  -9   21.88    1.43 
  -7  -1   9   31.21    1.84 
  -7   1   9   28.35    1.79 
   7   1  -9   28.36    1.58 
   6  -1  -9   19.96    1.18 
  -6  -1   9   22.44    1.43 
   6   1  -9   20.02    1.26 
  -6   1   9   21.18    1.41 
  -5  -1   9   38.47    1.91 
  -5   1   9   41.74    1.41 
   5   1  -9   42.48    1.73 
  -5  -1   9   39.23    1.25 
   5  -1  -9   39.40    1.60 
  -5   1   9   41.31    1.95 
   4  -1  -9    3.27    0.45 
  -4   1   9    3.27    0.39 
  -4  -1   9    3.69    0.34 
  -4   1   9    3.01    0.56 
  -4  -1   9    3.34    0.58 
   4   1  -9    3.42    0.50 
  -3   1   9    9.07    0.60 
  -3   1   9    7.99    0.70 
  -3  -1   9    8.52    0.59 
   3   1  -9    8.71    0.67 
   3  -1  -9    8.89    0.60 
  -3  -1   9   11.19    0.80 
  -2   1   9  217.20    6.05 
  -2  -1   9  223.22    5.91 
  -2   1   9  218.90    5.92 
   2  -1  -9  225.43    5.44 
   2   1  -9  225.95    5.63 
  -2  -1   9  223.84    6.07 
  -1   1   9   65.30    2.08 
  -1  -1   9   71.93    2.11 
  -1  -1   9   65.44    2.12 
   1  -1  -9   67.75    1.88 
  -1   1   9   66.15    2.13 
   1   1  -9   70.24    2.07 
   0   1   9  131.09    3.55 
   0  -1   9  129.85    3.53 
   0   1  -9  134.59    3.43 
   0   1  -9  136.06    3.50 
   0   1   9  131.70    3.76 
   0  -1   9  129.69    3.76 
   1   1   9   28.80    1.20 
   1  -1   9   27.03    1.12 
   1  -1   9   26.07    1.16 
   1   1   9   29.41    1.06 
   2  -1   9   39.58    1.53 
   2   1   9   37.86    1.41 
   2  -1   9   38.00    1.46 
   2   1   9   42.15    1.54 
   3   1   9   18.84    0.97 
   3  -1   9   17.20    1.01 
   3  -1   9   17.03    0.97 
  -3   1  -9   18.78    0.64 
   3   1   9   17.98    1.00 
   4   1   9  157.42    4.57 
   4   1   9  158.96    4.64 
   4  -1   9  162.95    4.60 
   4  -1   9  163.11    4.69 
  -4   1  -9  164.04    4.34 
   5   1   9   23.31    1.37 
   5  -1   9   25.65    1.26 
   5   1   9   23.12    1.20 
   5  -1   9   24.10    1.43 
  -5  -1  -9   22.95    1.11 
  -5   1  -9   25.20    1.08 
   6  -1   9   79.63    2.77 
   6   1   9   79.56    3.02 
  -6   1  -9   82.38    2.66 
  -6  -1  -9   83.38    2.70 
   6   1   9   78.58    2.71 
   6  -1   9   83.71    3.04 
   7  -1   9   21.45    1.53 
   7   1   9   24.69    1.66 
  -7   1  -9   22.92    1.31 
  -7  -1  -9   25.47    1.40 
   8   1   9    4.60    1.01 
   8  -1   9    4.46    0.96 
   9  -1   9    2.08    0.88 
   9   1   9    2.14    0.87 
  10   1   9    0.82    0.83 
  10  -1   9    1.07    0.79 
  11   1   9    5.31    1.26 
  11  -1   9    8.17    1.44 
 -11   2   9    1.42    0.82 
 -11  -2   9    0.83    0.82 
  11   2  -9   -0.69    0.62 
 -10   2   9   61.39    3.26 
 -10  -2   9   62.75    3.27 
  10   2  -9   60.59    2.98 
  10  -2  -9   65.21    2.89 
  -9  -2   9   -0.07    0.59 
  -9   2   9    0.48    0.59 
   9  -2  -9   -0.76    0.50 
   9   2  -9    0.48    0.56 
  -8  -2   9   48.29    2.58 
   8  -2  -9   50.87    2.25 
  -8   2   9   48.51    2.54 
   8   2  -9   46.65    2.31 
  -7   2   9    3.38    0.79 
   7   2  -9    4.40    0.76 
  -7  -2   9    3.71    0.89 
   7  -2  -9    4.37    0.73 
  -6   2   9    0.08    0.52 
  -6  -2   9    0.40    0.48 
   6   2  -9   -0.13    0.47 
   6  -2  -9   -0.15    0.42 
  -5  -2   9  131.46    4.26 
  -5   2   9  126.38    3.63 
   5  -2  -9  131.39    3.64 
   5   2  -9  121.74    3.82 
  -5   2   9  127.17    4.21 
  -4  -2   9    3.18    0.34 
  -4   2   9    3.57    0.61 
   4  -2  -9    4.67    0.48 
   4   2  -9    4.72    0.61 
  -4   2   9    4.76    0.49 
  -4  -2   9    4.63    0.65 
  -3   2   9  182.15    5.01 
   3  -2  -9  190.34    4.59 
  -3  -2   9  181.34    4.90 
   3   2  -9  183.30    4.90 
  -3  -2   9  184.89    5.30 
  -3   2   9  178.10    5.27 
  -2  -2   9  341.32    9.06 
   2   2  -9  343.53    8.49 
  -2  -2   9  345.12    8.87 
  -2   2   9  334.90    9.04 
   2  -2  -9  351.15    8.12 
  -2   2   9  339.71    8.93 
   1  -2  -9  180.69    4.29 
  -1  -2   9  173.67    4.80 
  -1  -2   9  176.02    4.83 
  -1   2   9  178.46    4.86 
   1   2  -9  171.00    4.62 
   0   2  -9 1714.31   40.16 
   0  -2   9 1761.04   43.04 
   0  -2   9 1705.30   43.97 
   0   2   9 1724.97   40.62 
   0   2   9 1770.39   43.03 
   1  -2   9    0.19    0.24 
   1  -2   9    0.36    0.27 
   1   2   9   -0.15    0.22 
   1   2   9   -0.22    0.18 
   2  -2   9 1241.37   31.08 
   2   2   9 1244.24   31.03 
   2   2   9 1244.35   28.95 
   2  -2   9 1237.98   29.06 
   3   2   9   51.93    1.89 
   3  -2   9   52.89    1.96 
  -3   2  -9   55.82    1.57 
   3  -2   9   53.13    1.94 
   3   2   9   53.60    1.92 
  -4   2  -9   80.09    2.31 
   4  -2   9   75.27    2.62 
   4   2   9   75.28    2.62 
   4   2   9   78.63    2.58 
   4  -2   9   77.31    2.64 
   5  -2   9    0.76    0.39 
   5   2   9    0.88    0.52 
   5  -2   9    0.28    0.47 
   5   2   9    0.89    0.38 
  -5   2  -9    1.02    0.33 
   6   2   9    2.20    0.71 
   6  -2   9    2.49    0.66 
   6   2   9    3.14    0.55 
  -6   2  -9    3.06    0.54 
   7  -2   9   56.23    2.48 
  -7   2  -9   53.35    2.13 
   7   2   9   53.34    2.47 
   8  -2   9    5.31    0.97 
   8   2   9    2.43    0.95 
   9   2   9   62.59    3.00 
   9  -2   9   62.35    2.98 
  10   2   9    0.39    0.72 
  10  -2   9    1.31    0.80 
  11   2   9   16.27    1.84 
  11  -2   9   15.25    1.73 
  11   3  -9    0.83    0.77 
 -11  -3   9   -0.51    0.62 
 -11   3   9    1.30    0.81 
 -10   3   9   14.70    1.70 
 -10  -3   9   14.76    1.70 
  10   3  -9   14.97    1.58 
  10  -3  -9   14.65    1.42 
  -9  -3   9    0.02    0.63 
   9  -3  -9    0.20    0.57 
  -9   3   9    0.18    0.60 
   9   3  -9    0.38    0.60 
   8  -3  -9   68.64    2.67 
  -8  -3   9   69.19    3.20 
  -8   3   9   63.40    3.10 
   8   3  -9   66.87    2.84 
  -7   3   9    6.35    0.98 
  -7  -3   9    5.38    0.95 
   7  -3  -9    7.30    0.81 
   7   3  -9    5.64    0.85 
  -6   3   9   45.77    2.22 
   6   3  -9   44.32    2.05 
   6  -3  -9   46.16    1.83 
  -6   3   9   46.00    1.70 
  -6  -3   9   42.85    2.17 
   5  -3  -9   13.55    0.82 
  -5   3   9   14.04    0.83 
  -5  -3   9   12.22    1.06 
   5   3  -9   16.02    1.05 
  -5   3   9   13.68    1.10 
   4  -3  -9   13.92    0.74 
  -4   3   9   11.92    0.82 
   4   3  -9   13.70    0.95 
  -4   3   9   11.68    0.96 
  -4  -3   9   13.68    1.00 
  -3  -3   9   37.69    1.63 
  -3   3   9   37.95    1.48 
  -3   3   9   39.56    1.65 
   3  -3  -9   37.89    1.19 
   3   3  -9   39.46    1.59 
   2   3  -9  109.71    3.25 
  -2  -3   9  108.71    3.36 
  -2   3   9  110.62    3.31 
  -2  -3   9  109.35    3.20 
   2  -3  -9  113.88    2.73 
  -1  -3   9   83.31    2.66 
  -1  -3   9   91.71    2.67 
  -1   3   9   89.70    2.74 
   1   3  -9   85.00    2.65 
   0   3   9  524.84   12.23 
   0  -3   9  517.79   13.38 
   0   3  -9  525.52   12.57 
   0   3   9  518.05   13.39 
   1  -3   9   78.38    2.56 
  -1   3  -9   80.66    2.35 
   1   3   9   77.09    2.52 
   1   3   9   78.71    2.20 
  -1   3  -9   79.20    2.40 
   2  -3   9 1213.79   30.74 
   2   3   9 1244.22   30.71 
   2   3   9 1227.40   28.60 
   2  -3   9 1222.86   28.77 
   3   3   9    3.57    0.52 
   3   3   9    4.10    0.51 
   3  -3   9    3.09    0.50 
   3  -3   9    2.56    0.49 
   4  -3   9 1071.44   25.51 
  -4   3  -9 1076.07   26.86 
   4   3   9 1062.25   25.48 
   4   3   9 1085.45   27.01 
  -5   3  -9  156.18    4.39 
   5  -3   9  154.68    4.64 
   5   3   9  154.57    4.64 
   5   3   9  154.83    4.54 
   6   3   9  238.95    6.69 
   6   3   9  255.17    6.94 
  -6   3  -9  242.31    6.67 
   6  -3   9  229.05    6.74 
   7   3   9  121.54    4.21 
   7  -3   9  115.81    4.07 
   8   3   9   18.19    1.56 
   8  -3   9   16.56    1.44 
   9  -3   9    1.62    0.74 
   9   3   9    1.17    0.79 
  10   3   9    0.39    0.82 
  10  -3   9    1.07    0.81 
  11   3   9    4.76    1.23 
  11  -3   9    4.07    1.14 
 -11  -4   9    0.89    0.81 
  11   4  -9   -0.53    0.72 
 -11   4   9    0.94    0.80 
 -10   4   9   34.03    2.31 
  10   4  -9   31.47    2.17 
 -10  -4   9   31.42    2.37 
   9  -4  -9   -0.01    0.53 
  -9   4   9   -0.03    0.64 
  -9  -4   9    0.00    0.60 
   9   4  -9    1.06    0.68 
   8   4  -9    7.09    1.04 
  -8  -4   9    7.38    1.20 
   8  -4  -9    8.55    0.98 
  -8   4   9    9.05    1.25 
  -7   4   9   32.37    1.95 
   7  -4  -9   31.77    1.56 
  -7  -4   9   30.91    1.91 
   7   4  -9   33.12    1.86 
   6   4  -9   12.73    1.13 
  -6  -4   9    9.95    1.12 
   6  -4  -9   11.46    0.93 
  -6   4   9   13.36    0.94 
  -6   4   9   14.05    1.28 
   5  -4  -9   48.70    1.69 
  -5  -4   9   45.53    2.15 
  -5   4   9   48.41    2.20 
  -5   4   9   49.00    1.85 
   5   4  -9   49.87    2.09 
  -4  -4   9    5.34    0.76 
  -4   4   9    4.49    0.57 
  -4   4   9    5.24    0.73 
   4   4  -9    3.74    0.63 
   4  -4  -9    4.44    0.44 
  -3   4   9    9.23    0.73 
   3   4  -9    9.52    0.83 
  -3  -4   9    8.25    0.80 
   3  -4  -9    8.35    0.48 
   2   4  -9  462.45   11.47 
  -2  -4   9  463.41   12.16 
  -2   4   9  466.64   12.07 
   1   4  -9    8.18    0.70 
  -1   4   9    8.65    0.70 
   0   4  -9  789.61   19.19 
   0   4   9  834.51   18.82 
   0   4   9  800.58   20.48 
  -1   4  -9    4.32    0.51 
  -1   4  -9    5.31    0.55 
   1   4   9    4.51    0.55 
   1   4   9    4.97    0.44 
   2   4   9  172.05    4.60 
   2   4   9  173.90    5.01 
   2  -4   9  179.50    4.85 
   3   4   9  111.36    3.27 
   3  -4   9  105.99    3.33 
   3   4   9  107.90    3.38 
   4  -4   9   42.06    1.82 
   4   4   9   44.68    1.78 
   4   4   9   43.04    1.84 
   5   4   9   33.56    1.48 
   5  -4   9   28.01    1.58 
  -5   4  -9   33.64    1.36 
   5   4   9   31.87    1.68 
  -6   4  -9   55.61    2.06 
   6   4   9   55.46    2.44 
   6   4   9   52.75    2.07 
   6  -4   9   53.78    2.33 
   7  -4   9    2.32    0.73 
   7   4   9    1.89    0.80 
   8   4   9    2.12    0.82 
   8  -4   9    0.47    0.66 
   9  -4   9   31.20    2.07 
   9   4   9   28.49    2.07 
  10   4   9    0.17    0.83 
  10  -4   9    0.63    0.80 
  11   4   9   14.87    1.82 
  11  -4   9   18.03    1.86 
 -11  -5   9    1.84    0.96 
  11   5  -9   -0.11    0.79 
 -11   5   9    1.56    0.94 
  10   5  -9    8.84    1.34 
 -10   5   9   15.03    1.66 
 -10  -5   9   11.13    1.56 
  -9   5   9   15.51    1.67 
   9   5  -9   10.37    1.33 
  -9  -5   9   17.90    1.74 
  -8  -5   9   18.84    1.69 
   8   5  -9   19.55    1.59 
  -8   5   9   21.30    1.73 
   8  -5  -9   20.95    1.35 
   7  -5  -9    9.79    0.91 
  -7   5   9    7.39    1.15 
   7   5  -9    7.49    1.07 
  -7  -5   9    8.04    1.17 
  -6   5   9    6.26    0.97 
   6   5  -9    5.11    0.86 
  -6  -5   9    8.52    1.10 
   6  -5  -9    5.24    0.68 
  -6   5   9    7.99    0.76 
   5   5  -9   44.93    2.07 
  -5   5   9   44.69    1.89 
   5  -5  -9   48.43    1.66 
  -5   5   9   44.41    2.17 
  -5  -5   9   51.51    2.28 
  -4   5   9   14.55    1.13 
  -4   5   9   13.12    0.97 
   4  -5  -9   12.97    0.71 
  -4  -5   9   10.93    0.98 
   4   5  -9   12.97    1.08 
   3   5  -9  632.15   15.50 
  -3   5   9  630.26   16.35 
   3  -5  -9  650.95   14.79 
  -3  -5   9  621.34   16.54 
  -2   5   9    0.75    0.35 
   2   5  -9    0.70    0.39 
  -1   5   9  411.94   10.99 
   1   5  -9  421.43   10.42 
   0   5   9  454.55   12.16 
   0   5  -9  468.60   11.47 
   0   5   9  471.63   10.92 
  -1   5  -9   22.60    1.15 
   1   5   9   20.47    0.88 
  -1   5  -9   21.69    1.11 
   1   5   9   23.59    1.18 
  -2   5  -9  285.45    7.34 
   2   5   9  288.71    7.81 
   2   5   9  285.32    7.14 
  -2   5  -9  282.01    7.18 
   3   5   9    8.27    0.74 
   3  -5   9    8.21    0.83 
   3   5   9    8.79    0.80 
   4  -5   9  164.31    4.75 
   4   5   9  158.96    4.64 
   4   5   9  158.69    4.76 
   5   5   9   82.33    3.15 
   5   5   9   95.57    3.10 
  -5   5  -9   95.52    2.96 
   5  -5   9   95.53    3.24 
  -6   5  -9    7.94    0.77 
   6  -5   9    6.38    0.89 
   6   5   9    7.81    0.75 
   6   5   9    8.92    1.07 
   7  -5   9  175.74    5.55 
   7   5   9  185.02    5.75 
   8   5   9    5.76    1.06 
   8  -5   9    4.52    0.95 
   9   5   9   51.47    2.86 
   9  -5   9   50.67    2.66 
  10  -5   9    1.52    0.86 
  10   5   9    0.56    0.80 
  11   5   9    7.22    1.48 
  11  -5   9    5.41    1.20 
 -11   6   9    0.44    0.82 
  11   6  -9    0.88    0.84 
 -10   6   9    1.12    0.72 
  10   6  -9   -0.92    0.55 
 -10  -6   9   -0.61    0.67 
  -9  -6   9   14.43    1.64 
   9   6  -9   10.77    1.43 
  -9   6   9   11.39    1.51 
  -8  -6   9    1.45    0.72 
   8   6  -9    2.10    0.77 
  -8   6   9    3.12    0.85 
   7   6  -9  280.50    8.10 
  -7  -6   9  290.85    8.71 
  -7   6   9  271.11    8.59 
  -6   6   9   10.46    1.19 
   6   6  -9   10.33    1.11 
  -6  -6   9    9.02    1.11 
  -6   6   9   10.61    0.95 
   6  -6  -9   10.61    0.87 
   5   6  -9  691.60   17.42 
  -5  -6   9  714.79   18.69 
   5  -6  -9  710.72   16.63 
  -5   6   9  691.46   18.17 
  -4   6   9   -0.19    0.32 
   4  -6  -9    0.00    0.23 
   4   6  -9    0.16    0.41 
   3   6  -9  487.87   12.21 
  -3   6   9  481.42   12.81 
  -2   6   9    4.74    0.63 
   2   6  -9    5.59    0.73 
  -1   6   9   19.54    1.14 
   1   6  -9   18.88    1.15 
   0   6  -9    0.71    0.37 
   0   6   9    0.03    0.16 
   0   6   9   -0.08    0.24 
   1   6   9    5.16    0.46 
  -1   6  -9    4.45    0.58 
   1   6   9    6.12    0.69 
   2   6   9  238.10    6.72 
   2   6   9  239.01    6.10 
  -2   6  -9  239.74    6.32 
  -2   6  -9  234.63    6.19 
   3   6   9   70.73    2.57 
   3   6   9   69.66    2.40 
   4  -6   9  359.60    9.29 
   4   6   9  356.21    9.63 
   4   6   9  351.96    9.18 
   5   6   9  183.57    5.41 
   5   6   9  187.52    5.44 
   5  -6   9  180.99    5.40 
   6   6   9   66.31    2.51 
   6   6   9   71.07    2.87 
   6  -6   9   69.29    2.78 
  -6   6  -9   67.80    2.52 
   7   6   9   47.13    2.49 
   7  -6   9   49.44    2.38 
   8   6   9    1.00    0.72 
   8  -6   9    0.91    0.61 
   9   6   9    0.26    0.82 
   9  -6   9    2.11    0.87 
  10   6   9    1.89    1.02 
  10  -6   9    2.26    0.92 
 -10   7   9    0.62    0.80 
  10   7  -9    1.75    0.89 
   9   7  -9   31.25    2.19 
  -9   7   9   28.48    2.23 
  -8   7   9   -0.01    0.46 
   8   7  -9    0.06    0.61 
   7   7  -9   23.34    1.71 
  -7   7   9   23.91    1.82 
  -6   7   9    0.64    0.55 
   6   7  -9    0.68    0.60 
  -6   7   9   -0.54    0.37 
   5   7  -9   33.18    1.87 
  -5   7   9   32.01    1.69 
   5  -7  -9   31.76    1.28 
   4   7  -9    1.26    0.60 
   4  -7  -9    0.80    0.28 
  -4   7   9    0.66    0.47 
  -3   7   9  636.85   14.88 
   3   7  -9  637.63   15.81 
  -3   7   9  638.51   16.69 
  -2   7   9   29.65    1.54 
   2   7  -9   32.16    1.62 
  -1   7   9  648.02   16.75 
   1   7  -9  635.28   15.72 
   0   7   9  369.22    8.75 
   0   7  -9  363.29    9.39 
   0   7   9  368.62   10.02 
   1   7   9   75.68    2.19 
  -1   7  -9   71.31    2.52 
   1   7   9   71.39    2.68 
  -2   7  -9  109.23    3.35 
   2   7   9  109.83    3.19 
  -2   7  -9  108.11    3.40 
   2   7   9  111.59    3.65 
  -3   7  -9    0.69    0.42 
   3   7   9   -0.41    0.31 
  -3   7  -9    0.37    0.39 
   3   7   9   -0.20    0.35 
   4  -7   9   -0.19    0.46 
   4   7   9    0.42    0.45 
   4   7   9    0.46    0.41 
   5  -7   9    5.33    0.82 
   5   7   9    4.90    0.70 
   5   7   9    4.61    0.80 
   6   7   9   42.92    2.18 
  -6   7  -9   43.18    1.93 
   6   7   9   44.00    1.94 
   6  -7   9   43.78    2.15 
   7   7   9   48.83    2.53 
   7  -7   9   53.84    2.50 
   8   7   9   11.02    1.43 
   8  -7   9   11.94    1.33 
   9   7   9   37.16    2.41 
   9  -7   9   40.37    2.30 
  10  -7   9    0.96    0.78 
  10   7   9    0.41    0.93 
  10   8  -9    1.22    0.96 
 -10   8   9    0.77    0.79 
   9   8  -9    0.14    0.72 
  -9   8   9    1.87    0.78 
   8   8  -9    0.60    0.73 
  -8   8   9    0.72    0.74 
   7   8  -9   76.71    3.34 
  -7   8   9   75.58    3.46 
   6   8  -9   -0.29    0.58 
  -6   8   9    0.74    0.58 
  -6   8   9    0.25    0.66 
   5   8  -9  197.62    5.63 
   5   8  -9  192.13    5.97 
  -5   8   9  195.61    5.98 
   4   8  -9    4.51    0.84 
  -4   8   9    6.09    0.86 
  -3   8   9  119.65    3.91 
   3   8  -9  105.11    3.73 
   2   8  -9    5.05    0.84 
  -2   8   9    3.05    0.69 
  -1   8   9   -0.06    0.38 
   1   8  -9   -0.19    0.41 
  -1   8   9    0.06    0.17 
   0   8  -9    0.47    0.49 
   0   8   9   -0.11    0.43 
   0   8   9    0.36    0.30 
   1   8   9   37.78    1.42 
   1   8   9   39.02    1.87 
  -1   8  -9   39.19    1.74 
  -2   8  -9   70.36    2.53 
   2   8   9   67.32    2.65 
   2   8   9   68.70    2.30 
   3   8   9   -0.71    0.28 
  -3   8  -9    0.20    0.36 
   3   8   9   -0.12    0.34 
  -3   8  -9   -0.26    0.32 
   4   8   9  111.91    3.81 
   4   8   9  109.42    3.64 
  -4   8  -9  114.74    3.58 
  -4   8  -9  112.96    3.65 
   5  -8   9   25.46    1.61 
   5   8   9   27.33    1.54 
   5   8   9   26.75    1.63 
   6  -8   9   14.56    1.33 
   6   8   9   15.09    1.21 
   6   8   9   14.66    1.36 
   7  -8   9   24.87    1.70 
   7   8   9   26.02    1.84 
   8   8   9    2.65    0.99 
   8  -8   9    3.65    0.91 
   9   8   9    1.91    0.93 
   9  -8   9    4.11    0.98 
  10   8   9    3.60    1.15 
  10  -8   9    1.97    0.96 
  10   9  -9    0.25    0.78 
 -10   9   9    0.40    0.86 
   9   9  -9    0.46    0.74 
  -9   9   9    2.19    0.91 
  -8   9   9    0.04    0.77 
   8   9  -9    1.75    0.90 
  -7   9   9    3.49    0.89 
   7   9  -9    3.60    0.96 
  -6   9   9    2.97    0.96 
   6   9  -9    0.67    0.75 
  -6   9   9    1.06    0.70 
  -5   9   9    1.72    0.64 
   5   9  -9    2.43    0.83 
   5   9  -9    1.78    0.51 
   4   9  -9    2.18    0.76 
  -4   9   9    1.08    0.71 
  -3   9   9   14.42    1.23 
   3   9  -9   14.02    1.24 
   2   9  -9    4.00    0.79 
  -2   9   9    3.81    0.76 
  -1   9   9   12.70    0.62 
  -1   9   9   12.47    1.07 
   1   9  -9   12.86    1.12 
   0   9   9   64.04    2.67 
   0   9   9   72.32    2.02 
   0   9  -9   62.39    2.49 
   1   9   9    0.92    0.34 
  -1   9  -9    0.28    0.45 
   1   9   9    0.67    0.41 
  -2   9  -9   46.56    2.01 
   2   9   9   43.58    1.77 
   2   9   9   42.71    2.10 
  -3   9  -9   21.07    1.29 
  -3   9  -9   22.48    1.35 
   3   9   9   25.80    1.39 
   3   9   9   22.84    1.44 
   4   9   9   10.54    1.07 
  -4   9  -9   12.08    1.11 
  -4   9  -9   13.02    1.13 
   4   9   9   10.45    1.08 
  -5   9  -9    5.96    0.87 
   5   9   9    5.18    0.82 
  -5   9  -9    4.25    0.78 
   5   9   9    4.66    0.87 
   6   9   9    0.36    0.55 
   6   9   9    0.66    0.70 
   6  -9   9    0.03    0.63 
   7   9   9    1.14    0.73 
   7  -9   9    1.47    0.71 
   8   9   9    0.39    0.74 
   8  -9   9    0.36    0.65 
   9   9   9    0.53    0.78 
   9  -9   9    0.98    0.70 
  10  -9   9    0.65    0.79 
  10   9   9    1.17    0.93 
 -10  10   9    3.97    1.31 
  10  10  -9    3.85    1.21 
  -9  10   9    6.06    1.30 
   9  10  -9    4.43    1.22 
   8  10  -9   13.12    1.62 
  -8  10   9   10.58    1.57 
   7  10  -9   17.13    1.67 
  -7  10   9   21.28    1.59 
  -7  10   9   18.23    1.79 
   6  10  -9    1.31    0.78 
  -6  10   9    1.65    0.71 
   5  10  -9   70.24    2.73 
   5  10  -9   71.94    3.15 
  -5  10   9   72.52    3.07 
   4  10  -9    2.72    0.80 
  -4  10   9    3.29    0.77 
  -3  10   9   55.58    2.55 
   3  10  -9   55.78    2.49 
  -2  10   9   14.18    1.34 
   2  10  -9   17.24    1.42 
   1  10  -9   47.18    2.16 
  -1  10   9   48.92    2.31 
   0  10  -9   34.61    1.88 
   0  10   9   41.66    2.13 
   0  10   9   39.55    1.46 
   1  10   9   16.01    1.31 
  -1  10  -9   15.60    1.22 
   1  10   9   20.72    1.06 
   2  10   9   79.12    2.69 
  -2  10  -9   83.13    2.97 
   2  10   9   77.22    3.14 
   3  10   9    2.26    0.69 
   3  10   9    2.18    0.63 
  -3  10  -9    2.83    0.70 
  -4  10  -9   12.32    1.13 
  -4  10  -9   13.13    1.10 
   4  10   9   13.98    1.23 
   4  10   9   12.13    1.11 
  -5  10  -9   18.46    1.38 
   5  10   9   16.09    1.36 
   5  10   9   18.08    1.35 
  -5  10  -9   16.48    1.28 
  -6  10  -9    0.74    0.62 
  -6  10  -9   -0.37    0.51 
   6  10   9    1.36    0.70 
   6  10   9    0.09    0.50 
   7 -10   9    4.65    0.99 
   7  10   9    4.76    1.05 
   8 -10   9    0.82    0.71 
   8  10   9   -1.14    0.67 
   9 -10   9    2.21    0.90 
   9  10   9    2.22    1.10 
   9  11  -9    9.51    1.64 
  -9  11   9   11.67    1.71 
   8  11  -9    0.30    0.79 
  -8  11   9    1.29    0.81 
  -7  11   9    4.33    1.13 
  -7  11   9    5.65    1.04 
   7  11  -9    5.47    1.25 
   6  11  -9    2.13    0.90 
  -6  11   9    1.30    0.70 
  -5  11   9    0.24    0.61 
   5  11  -9    0.89    0.77 
  -4  11   9    2.15    0.74 
   4  11  -9    1.30    0.69 
   4  11  -9    0.21    0.52 
  -3  11   9   88.01    3.59 
   3  11  -9   88.66    3.42 
  -2  11   9   35.52    2.03 
   2  11  -9   35.74    1.97 
  -1  11   9  139.25    4.91 
   1  11  -9  145.47    4.61 
   0  11   9   24.46    1.12 
   0  11  -9   23.98    1.51 
   0  11   9   20.08    1.50 
  -1  11  -9   48.00    2.20 
   1  11   9   48.05    2.37 
   1  11   9   48.77    1.84 
   2  11   9    0.47    0.56 
  -2  11  -9    1.15    0.58 
   2  11   9    1.08    0.52 
   3  11   9    1.99    0.67 
   3  11   9    1.49    0.60 
  -3  11  -9    3.60    0.75 
   4  11   9   19.18    1.39 
   4  11   9   15.69    1.38 
  -4  11  -9   18.74    1.40 
   5  11   9   -0.18    0.55 
  -5  11  -9    0.71    0.62 
   5  11   9    0.28    0.64 
  -5  11  -9    0.62    0.63 
   6  11   9   33.01    2.08 
  -6  11  -9   35.43    1.98 
  -6  11  -9   35.70    1.93 
  -7  11  -9   13.13    1.31 
  -7  11  -9   11.77    1.32 
   7  11   9   11.51    1.46 
  -8  11  -9    7.17    1.12 
  -8  11  -9    8.57    1.13 
   8  11   9    6.35    1.20 
   9  11   9   15.33    1.84 
  -9  12   9    1.93    1.01 
   9  12  -9    1.01    0.90 
   8  12  -9    0.90    0.96 
  -8  12   9    1.77    0.87 
   7  12  -9   38.24    2.56 
  -7  12   9   41.69    2.48 
  -7  12   9   40.35    2.68 
  -6  12   9    0.67    0.68 
   6  12  -9    0.21    0.66 
   5  12  -9  146.19    5.15 
  -5  12   9  137.70    5.16 
  -4  12   9    8.83    1.21 
   4  12  -9    6.42    0.90 
   4  12  -9    5.32    1.06 
  -3  12   9   73.44    3.32 
   3  12  -9   75.71    3.16 
   2  12  -9    5.29    0.93 
  -2  12   9    5.60    1.00 
   1  12  -9    3.51    0.81 
  -1  12   9    3.25    0.84 
   0  12  -9    7.25    0.97 
   0  12   9    6.76    1.01 
  -1  12  -9    6.92    0.93 
   1  12   9    5.41    0.99 
   1  12   9    6.69    0.74 
   2  12   9  100.25    3.24 
  -2  12  -9   97.27    3.49 
   2  12   9   93.06    3.76 
   3  12   9    1.29    0.72 
  -3  12  -9    2.09    0.70 
   3  12   9    1.13    0.67 
  -4  12  -9   77.63    3.08 
   4  12   9   80.42    3.10 
   4  12   9   77.76    3.33 
   5  12   9   19.73    1.69 
  -5  12  -9   20.53    1.51 
  -5  12  -9   21.22    1.59 
   5  12   9   21.87    1.68 
   6  12   9    6.64    1.13 
  -6  12  -9    5.61    0.99 
  -6  12  -9    5.47    1.00 
  -7  12  -9   12.33    1.38 
  -7  12  -9   13.45    1.35 
   7  12   9   13.52    1.55 
   8  12   9    1.45    0.91 
  -8  12  -9    1.99    0.81 
  -8  12  -9    1.71    0.85 
   9  12   9   -0.07    0.88 
  -9  12  -9    3.34    0.98 
  -9  12  -9    1.77    0.85 
  -8  13   9    2.72    0.94 
   8  13  -9    1.08    1.01 
  -7  13   9    3.59    0.98 
   7  13  -9    4.11    1.21 
  -6  13   9   -0.91    0.51 
   6  13  -9    0.01    0.72 
   5  13  -9    2.14    0.96 
  -5  13   9    3.07    0.97 
  -4  13   9   -0.73    0.51 
   4  13  -9    0.44    0.71 
   4  13  -9   -0.20    0.45 
   3  13  -9   99.38    3.85 
   3  13  -9   97.33    3.78 
  -3  13   9   95.75    4.05 
  -2  13   9   14.03    1.48 
   2  13  -9   14.19    1.35 
  -1  13   9   67.61    3.22 
   1  13  -9   71.58    3.00 
   0  13  -9   97.45    3.63 
   0  13   9  103.15    4.10 
   1  13   9    7.98    1.23 
  -1  13  -9   11.06    1.17 
   2  13   9   93.57    3.91 
  -2  13  -9  101.66    3.63 
   2  13   9   96.89    3.30 
   3  13   9    0.20    0.59 
  -3  13  -9    0.32    0.59 
   3  13   9    0.00    0.55 
   4  13   9   18.38    1.59 
  -4  13  -9   19.61    1.52 
   4  13   9   20.39    1.53 
   5  13   9    1.01    0.65 
   5  13   9    1.28    0.69 
  -5  13  -9    0.74    0.64 
  -6  13  -9   -0.14    0.61 
  -6  13  -9   -0.80    0.52 
   6  13   9   -0.03    0.61 
  -7  13  -9    9.01    1.19 
   7  13   9    7.75    1.35 
  -7  13  -9    9.80    1.27 
   8  13   9    0.49    0.82 
  -8  13  -9    0.47    0.62 
  -8  13  -9    0.75    0.79 
  -8  14   9    5.53    1.24 
   8  14  -9    3.43    1.19 
   7  14  -9    6.98    1.46 
  -7  14   9    7.68    1.36 
   6  14  -9    1.65    0.90 
  -6  14   9    1.80    0.89 
  -5  14   9   11.07    1.48 
   5  14  -9    9.42    1.44 
   4  14  -9   11.38    1.28 
  -4  14   9   12.88    1.55 
   4  14  -9   14.26    1.53 
   3  14  -9    0.68    0.73 
   3  14  -9    0.50    0.61 
  -3  14   9    0.96    0.81 
   2  14  -9   72.67    3.24 
  -2  14   9   84.41    3.73 
   1  14  -9   17.46    1.52 
  -1  14   9   19.42    1.69 
   0  14  -9  104.49    3.83 
   0  14   9  104.67    4.30 
   1  14   9   10.36    1.30 
  -1  14  -9    9.67    1.14 
  -2  14  -9   21.49    1.57 
   2  14   9   22.64    1.80 
  -3  14  -9    0.64    0.62 
   3  14   9   -0.04    0.59 
  -4  14  -9    2.30    0.85 
   4  14   9    4.27    0.90 
   4  14   9    1.82    0.77 
   5  14   9    0.87    0.72 
  -5  14  -9    0.74    0.63 
   5  14   9   -0.36    0.68 
   6  14   9    2.42    0.93 
  -6  14  -9    2.70    0.88 
   7  14   9    3.46    1.10 
  -7  14  -9    1.83    0.82 
   8  14   9    0.94    0.94 
  -8  14  -9   -0.73    0.77 
  -7  15   9    2.78    1.03 
   7  15  -9    2.64    1.13 
   6  15  -9    6.79    1.42 
  -6  15   9    8.17    1.42 
  -5  15   9    9.18    1.45 
   5  15  -9    8.12    1.41 
   4  15  -9    1.44    0.74 
   4  15  -9    3.14    1.03 
  -4  15   9    1.64    0.94 
  -3  15   9   25.03    2.00 
   3  15  -9   26.30    1.84 
   3  15  -9   25.72    1.90 
   2  15  -9    3.76    0.95 
  -2  15   9    2.58    1.00 
   2  15  -9    5.52    1.03 
  -1  15   9   -0.63    0.59 
   1  15  -9    0.49    0.62 
   0  15  -9   13.22    1.34 
   0  15   9   11.39    1.47 
   1  15   9    3.65    1.00 
  -1  15  -9    6.17    1.03 
  -2  15  -9   79.17    3.27 
   2  15   9   83.04    3.75 
  -3  15  -9   -0.09    0.68 
   3  15   9   -0.20    0.61 
  -4  15  -9   75.36    3.23 
   4  15   9   73.65    3.54 
   5  15   9    9.74    1.27 
   5  15   9    8.00    1.25 
  -5  15  -9    8.75    1.22 
  -6  15  -9   18.81    1.63 
   6  15   9   15.19    1.63 
   7  15   9   10.50    1.50 
   6  16  -9    0.15    0.88 
  -6  16   9    0.97    0.93 
   5  16  -9   -0.60    0.76 
  -5  16   9    0.54    0.85 
   4  16  -9    0.28    0.60 
  -4  16   9    0.45    0.79 
   4  16  -9   -0.06    0.72 
  -3  16   9   13.77    1.68 
   3  16  -9   15.29    1.59 
   3  16  -9   14.07    1.50 
  -2  16   9   19.97    1.94 
   2  16  -9   20.28    1.76 
   2  16  -9   19.94    1.70 
  -1  16   9   11.18    1.50 
   1  16  -9   13.99    1.43 
   1  16  -9   12.02    1.41 
   0  16   9   85.43    4.05 
   0  16  -9   92.75    3.64 
  -1  16  -9    0.62    0.67 
   1  16   9    0.89    0.83 
   2  16   9   42.42    2.64 
  -2  16  -9   40.43    2.26 
   3  16   9    5.78    1.20 
  -3  16  -9    6.86    1.13 
   4  16   9    0.91    0.77 
  -4  16  -9    1.38    0.77 
   5  16   9    0.60    0.73 
  -6  16  -9    0.61    0.77 
   5  17  -9    0.98    0.93 
  -5  17   9    1.37    0.94 
  -4  17   9   -0.21    0.81 
   4  17  -9    1.35    0.86 
   4  17  -9    1.16    0.75 
   3  17  -9    3.86    1.07 
   3  17  -9    3.01    0.97 
  -3  17   9    2.98    1.04 
   2  17  -9    4.03    1.05 
   2  17  -9    3.32    1.02 
  -2  17   9    4.60    1.24 
  -1  17   9   -0.21    0.72 
   1  17  -9    0.01    0.73 
   1  17  -9    1.08    0.78 
   0  17   9    1.58    0.90 
   0  17  -9   -0.11    0.52 
   0  17  -9    0.44    0.72 
   1  17   9    1.28    0.80 
  -1  17  -9    2.58    0.87 
  -1  17  -9    2.20    0.87 
  -2  17  -9   19.11    1.79 
  -2  17  -9   23.97    1.78 
   2  17   9   20.53    1.90 
  -3  17  -9    1.81    0.76 
   3  17   9   -0.03    0.69 
  -3  17  -9    0.03    0.67 
  -4  17  -9   18.62    1.89 
   4  17   9   17.78    1.85 
  -5  17  -9    8.66    1.40 
   4  18  -9    6.04    1.27 
  -4  18   9    4.06    1.26 
   3  18  -9    2.83    1.00 
  -3  18   9    0.59    0.91 
   3  18  -9    2.85    0.88 
  -2  18   9    0.75    0.84 
   2  18  -9    0.79    0.70 
   2  18  -9    0.34    0.73 
   1  18  -9    2.54    0.89 
   1  18  -9    2.97    0.95 
  -1  18   9    2.01    1.00 
   0  18  -9    1.82    0.87 
   0  18  -9    1.85    0.85 
   0  18   9    1.04    0.85 
  -1  18  -9    1.79    0.85 
  -1  18  -9    3.67    1.03 
   1  18   9    3.68    1.07 
   2  18   9    0.37    0.76 
  -2  18  -9    0.09    0.73 
  -2  18  -9    0.34    0.75 
  -3  18  -9    9.32    1.47 
   3  18   9    5.81    1.38 
   4  18   9    1.61    0.96 
  -4  18  -9    1.79    0.90 
   3  19  -9    2.03    0.95 
   3  19  -9    3.88    1.13 
  -3  19   9    5.59    1.35 
   2  19  -9    0.54    0.83 
  -2  19   9    0.25    0.72 
   2  19  -9    0.61    0.85 
   1  19  -9    6.98    1.37 
   1  19  -9    4.42    1.12 
  -1  19   9    4.37    1.26 
   0  19   9    1.76    0.99 
   0  19  -9    1.36    0.97 
   0  19  -9    1.23    0.84 
  -1  19  -9    0.72    0.83 
   1  19   9    0.52    0.91 
   2  19   9    1.55    0.98 
  -2  19  -9    1.25    0.81 
   3  19   9    0.32    0.80 
  -3  19  -9    0.28    0.75 
 -11   0  10    3.23    1.04 
  11   0 -10    2.58    0.90 
  10   0 -10    5.90    1.04 
 -10   0  10    3.27    1.02 
  -9   0  10    1.21    0.79 
   9   0 -10    0.56    0.65 
  -8   0  10   95.65    3.94 
   8   0 -10   99.54    3.49 
   7   0 -10   68.03    2.62 
  -7   0  10   68.26    3.01 
  -6   0  10  213.80    6.64 
   6   0 -10  222.68    5.99 
   5   0 -10  500.10   12.26 
  -5   0  10  501.81   12.64 
  -5   0  10  498.06   13.45 
  -4   0  10  138.00    4.26 
  -4   0  10  137.24    3.77 
   4   0 -10  129.97    3.72 
  -3   0  10  471.83   11.89 
   3   0 -10  460.40   11.17 
  -3   0  10  463.84   12.23 
  -2   0  10   -0.12    0.18 
  -2   0  10    0.29    0.26
[truncated: 1,251,960 more chars]
