# Supplementary material
Source: MDPI journal article supplement (https://www.mdpi.com/2073-4352/6/9/103)
Supplement: s1 [file s1 › crystals-145466-final check-suppl/crystals-145466-final check -suppl.pdf]

# Supplementary Materials: Three-Dimensional Cadmium(II) Cyanide Coordination Polymers with Ethoxy-, Butoxy- and Hexyloxy-ethanol

Takeshi Kawasaki and Takafumi Kitazawa \*

## S1: Experiment for TGA measurement

All TGA measurements were performed by a SII EXSTAR TG/DTA 6200 (SII, Chiba, Japan). The samples were put in aluminum pan and the TGA data were measured from RT to 500 °C under nitrogen atmosphere and heating rate of 4 °C min<sup>-1</sup>.

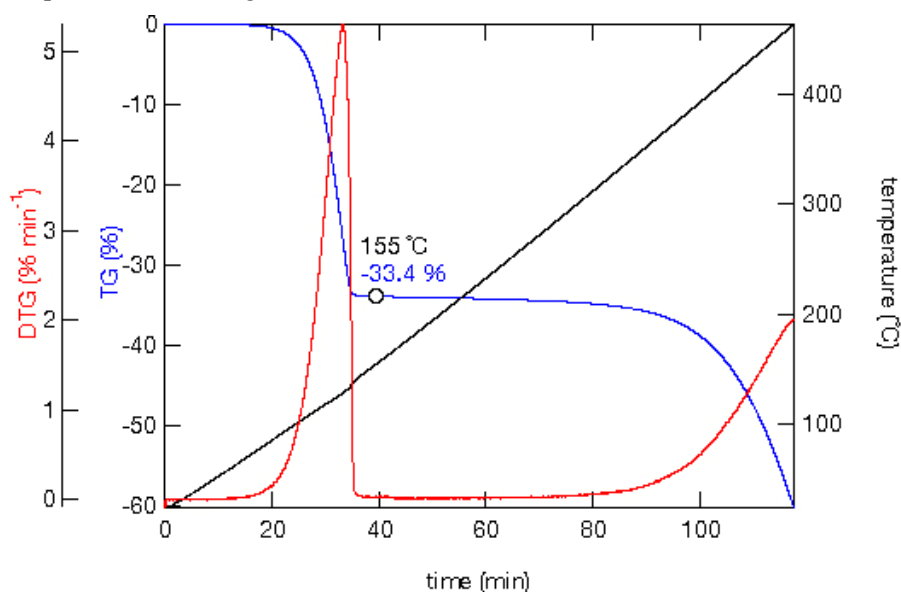

**Figure S1.** TG and DTG plots of **I**. Calculated for percentage by mass of Etcel ligand per **I**: 35.40%.

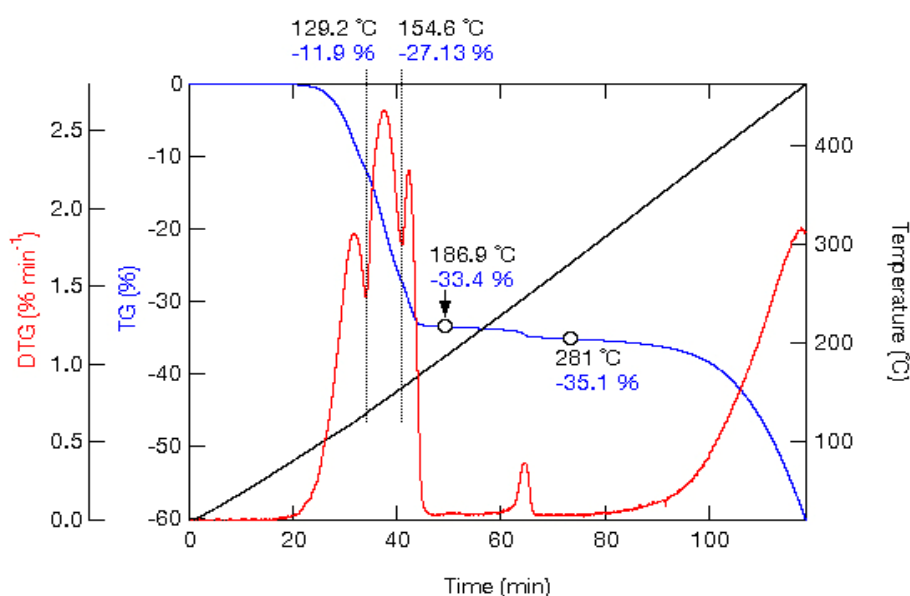

**Figure S2.** TG and DTG plots of **II**.

TG curve was observed seeming one-steps weight loss about range from 100 to 180 °C. However, DTG curve showed that the weight loss was three-steps. The weight loss about 200 °C seems to trigger decomposition [1] of Cd(CN)<sub>2</sub> framework for weight loss at more than 300 °C. Calculated for percentage by mass of Bucel ligands per **II**: 35.02%.

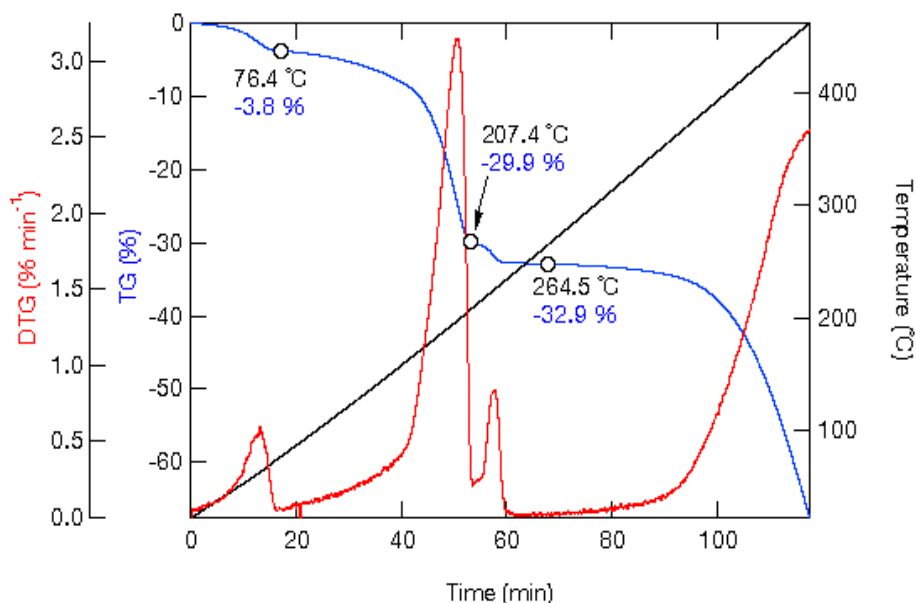

Figure S3. TG and DTG plots of **III**.

Calculated for percentage by mass of Hexcel molecules and H<sub>2</sub>O molecules per **III**: 29.66% and 3.65%, respectively.

#### Reference:

- 1 Bryant, M.R.; Burrows, A.D.; Fitchett, C.M.; Hawes, C.S.; Hunter, S.O.; Keenan, L.L.; Kelly, D.J.; Kruger, P.E.; Mahon M.F.; Richardson, C. The synthesis and characterisation of coordination and hydrogen-bonded networks based on 4-(3,5-dimethyl-1H-pyrazol-4-yl)benzoic acid. *Dalton Trans.* **2015**, *44*, 9269–9280.

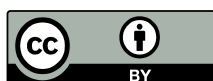

© 2016 by the authors. Submitted for possible open access publication under the terms and conditions of the Creative Commons Attribution (CC-BY) license (<http://creativecommons.org/licenses/by/4.0/>).
